# Supplementary material
Source: PubMed Central journal article supplement (PMC3132838)

### 3-ureidopropionate

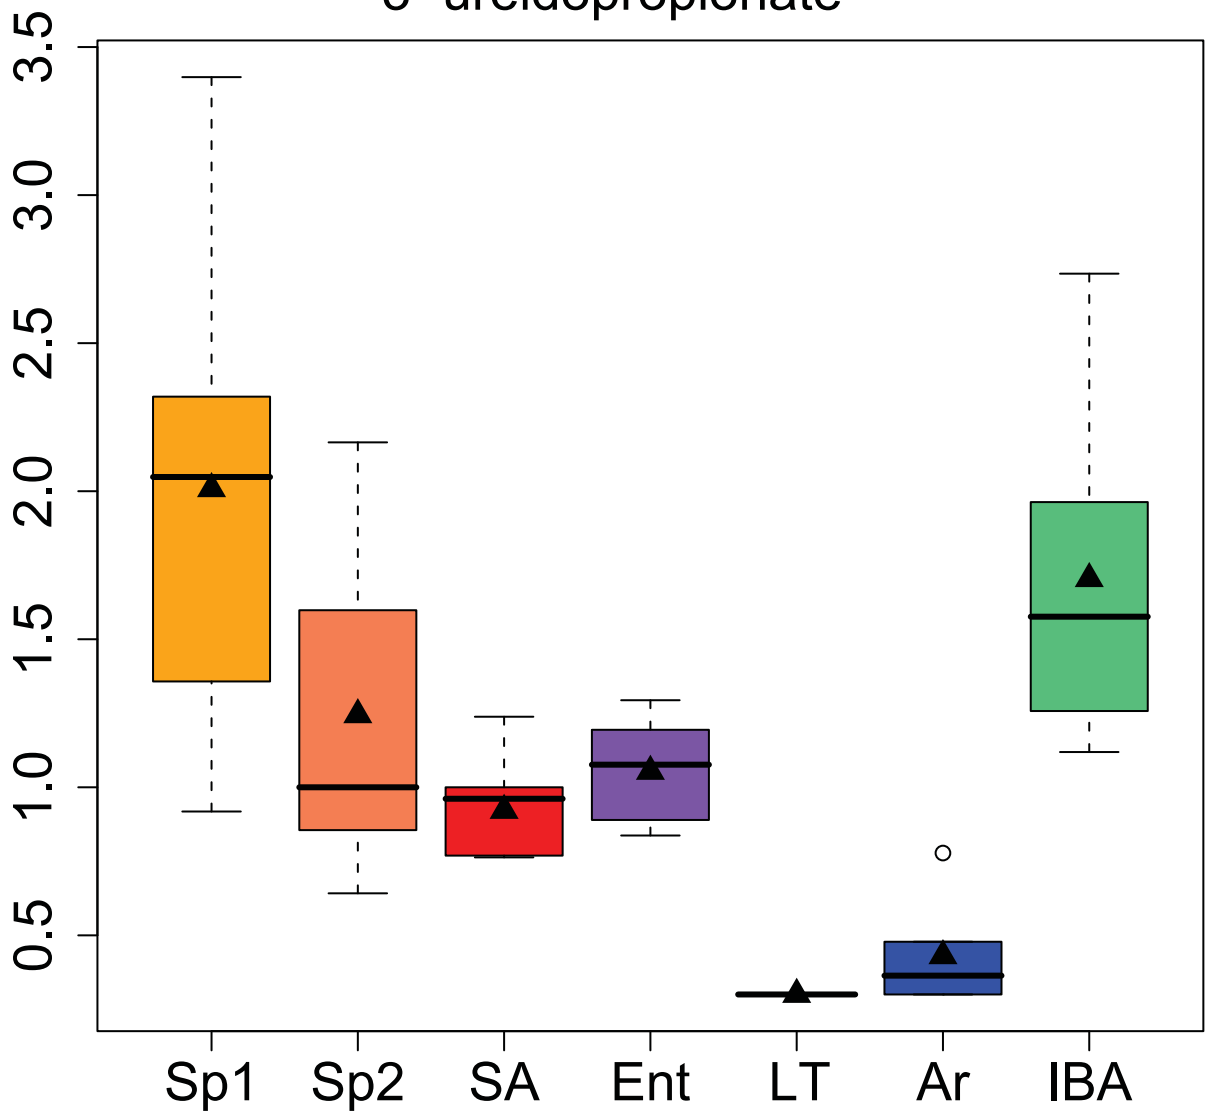

# alanine

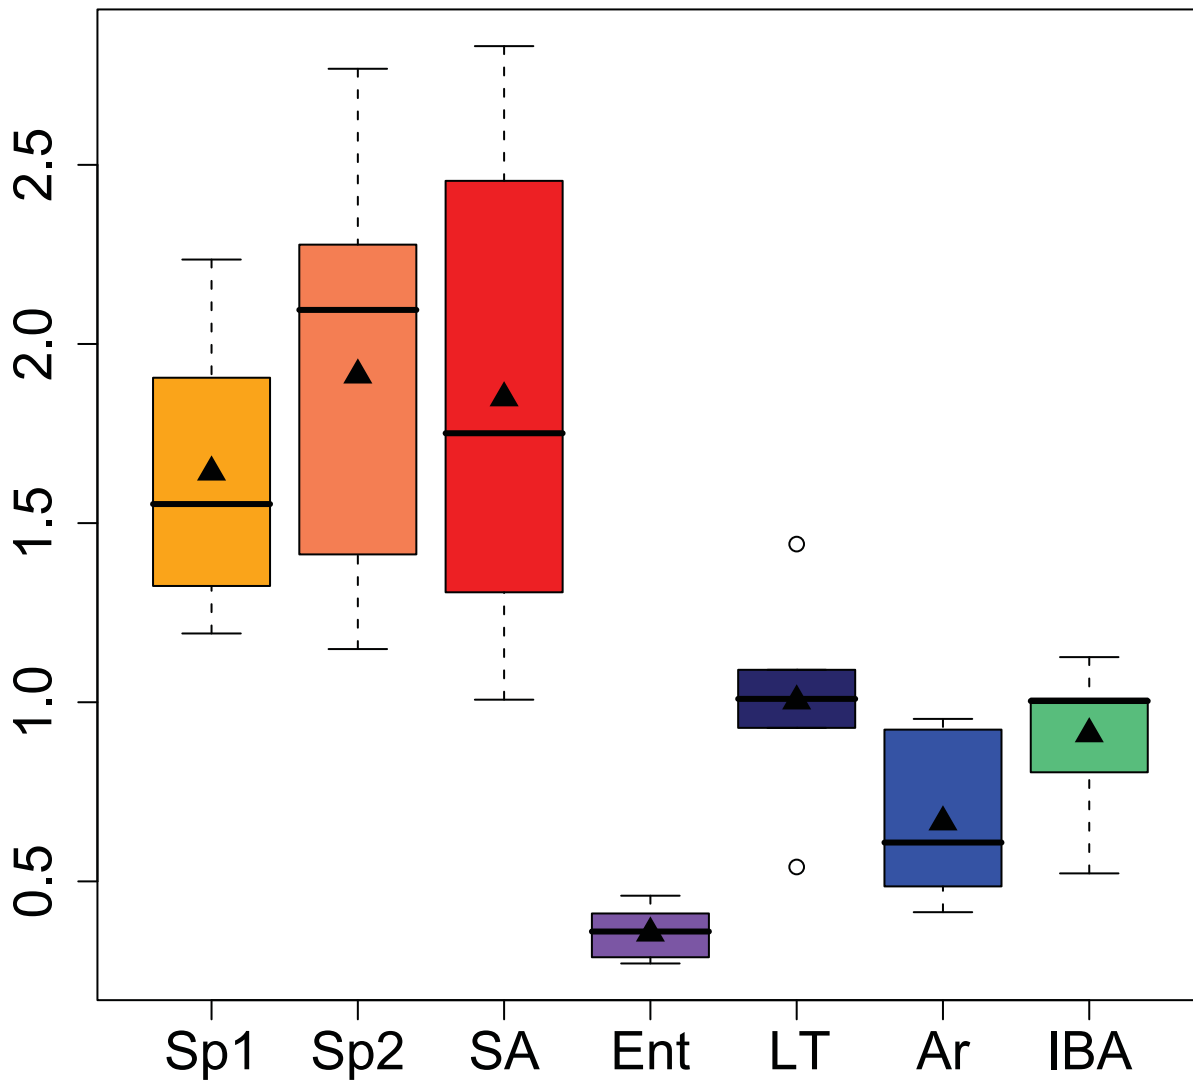

# aspartate

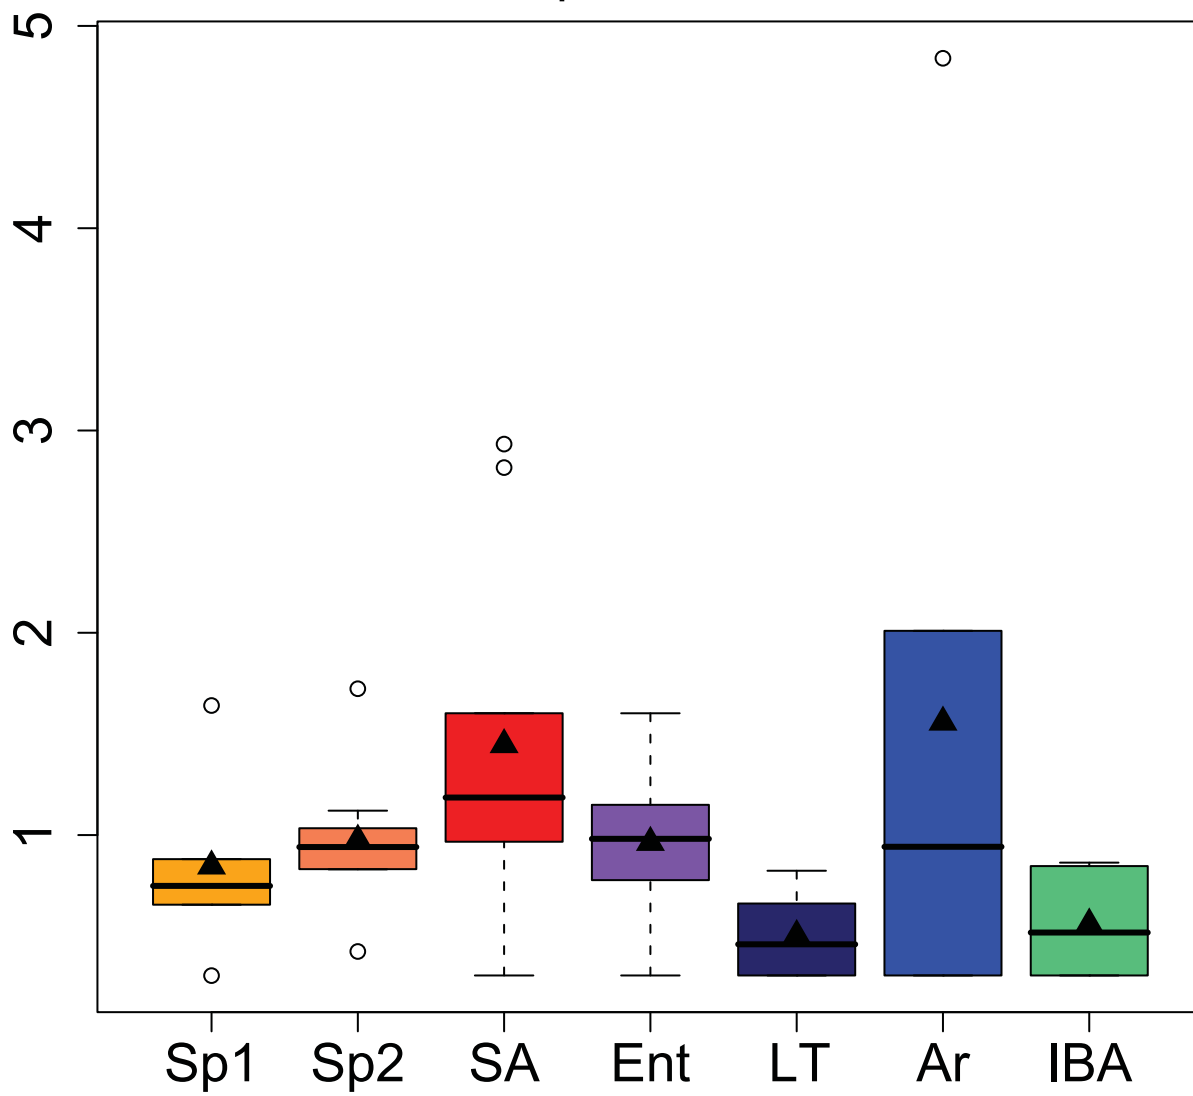

# 2-aminobutyrate

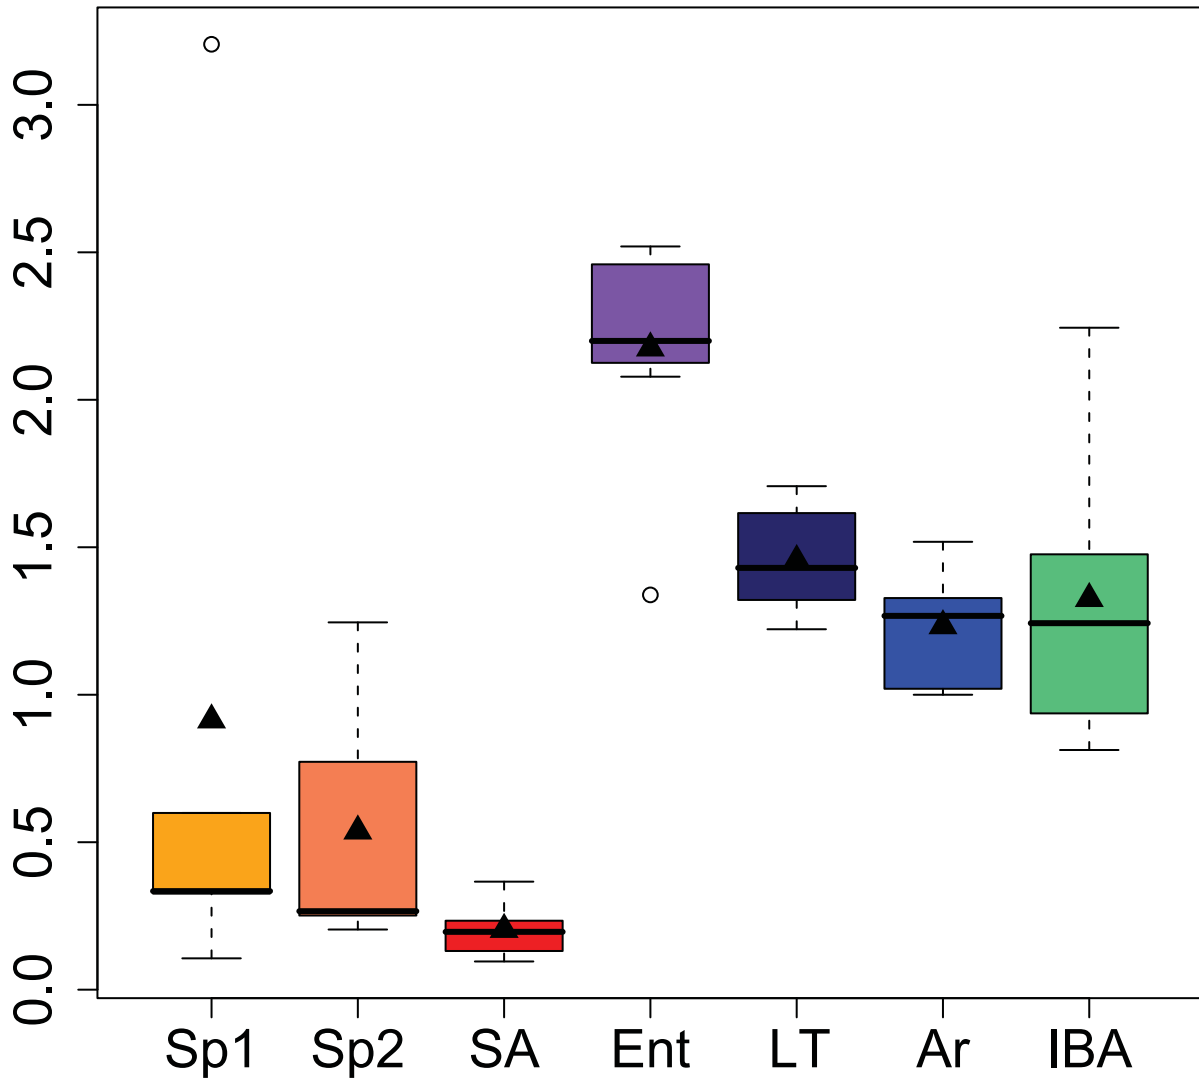

# creatine

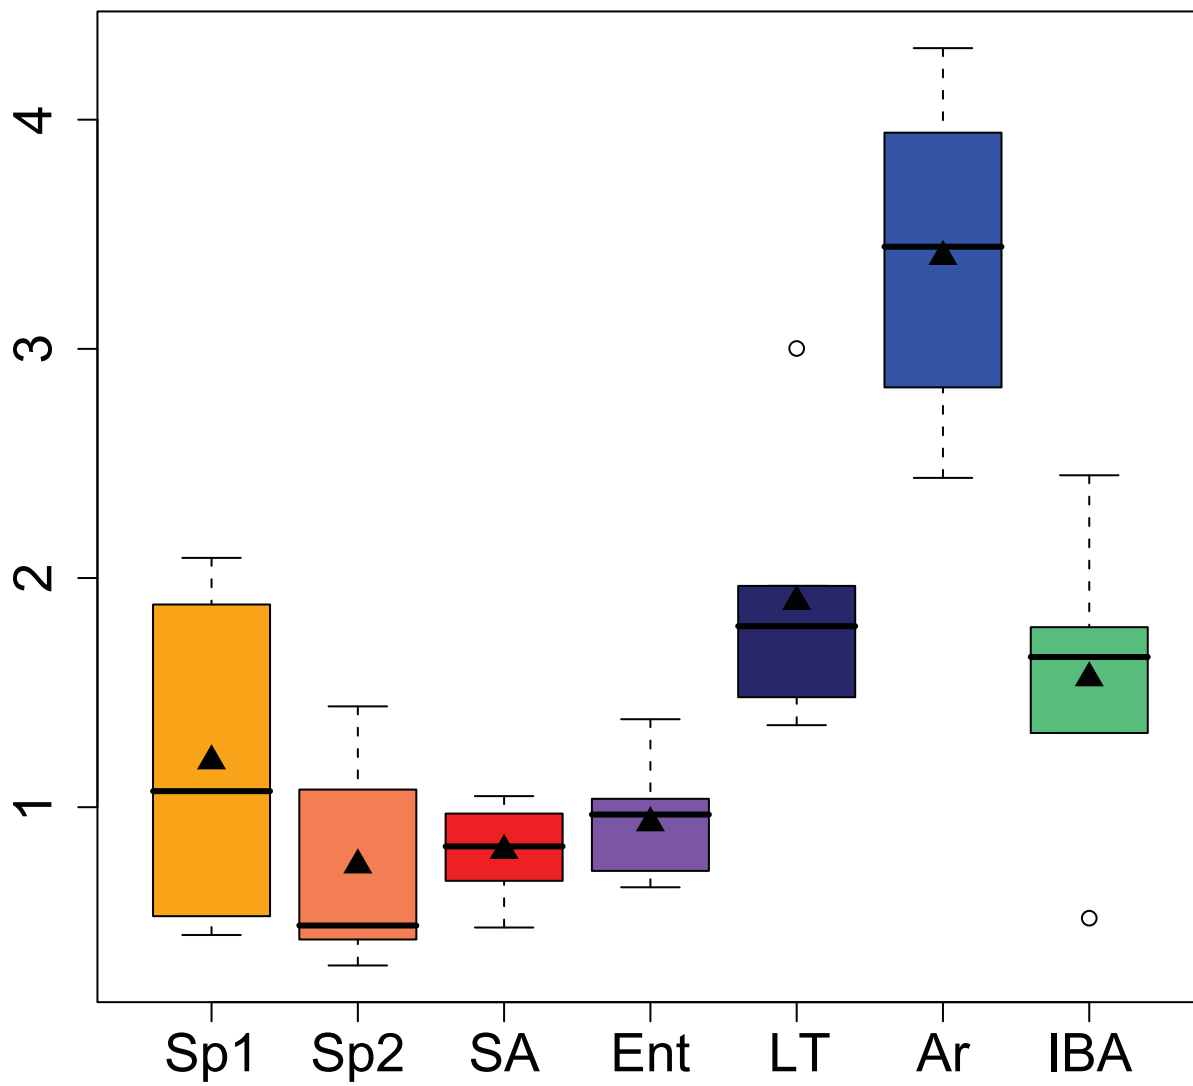

# creatinine

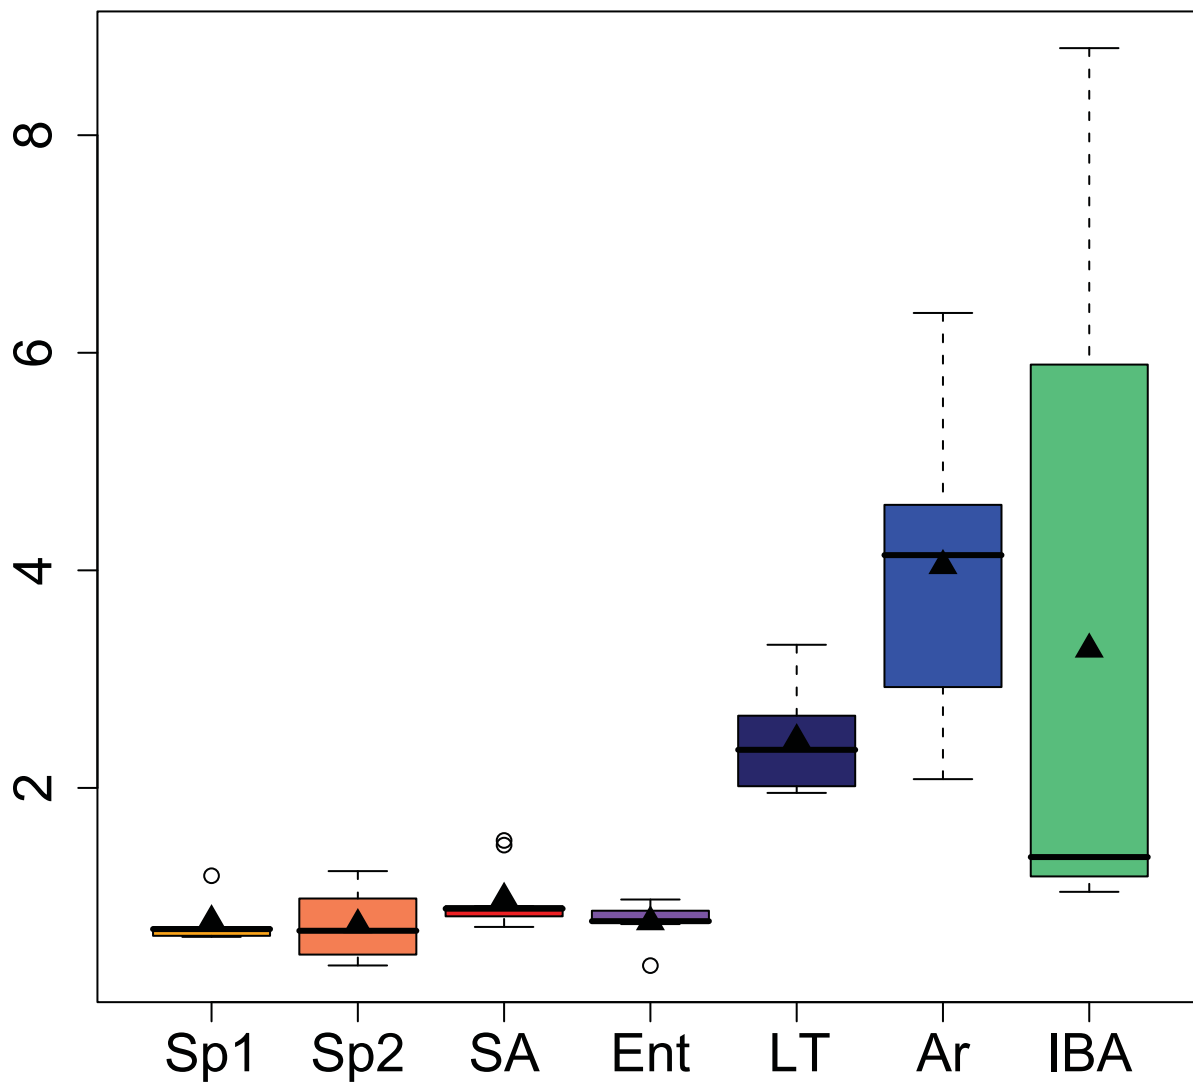

## 2-hydroxybutyrate (AHB)

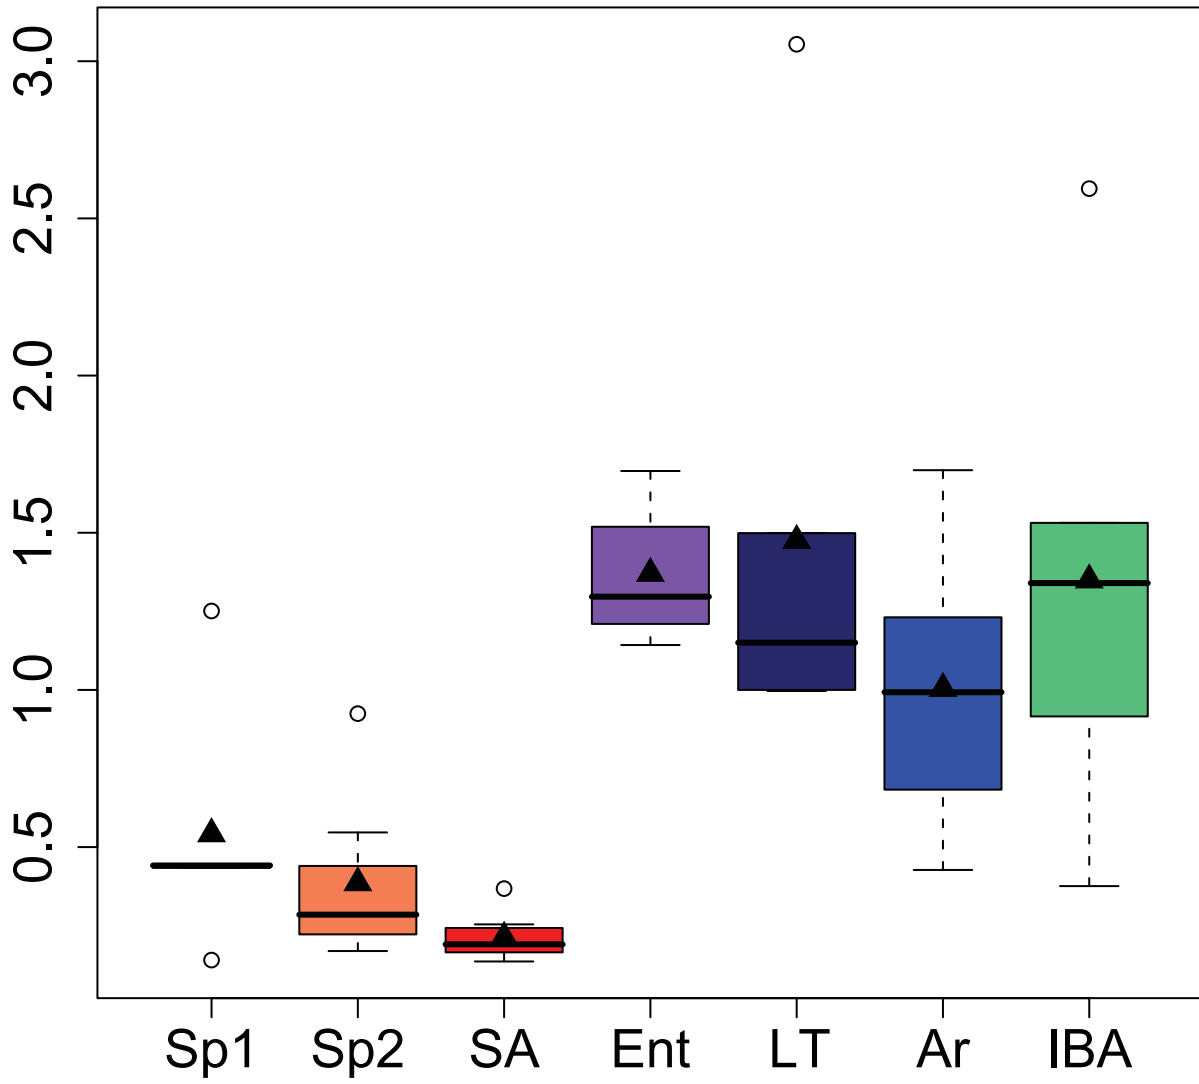

# methionine

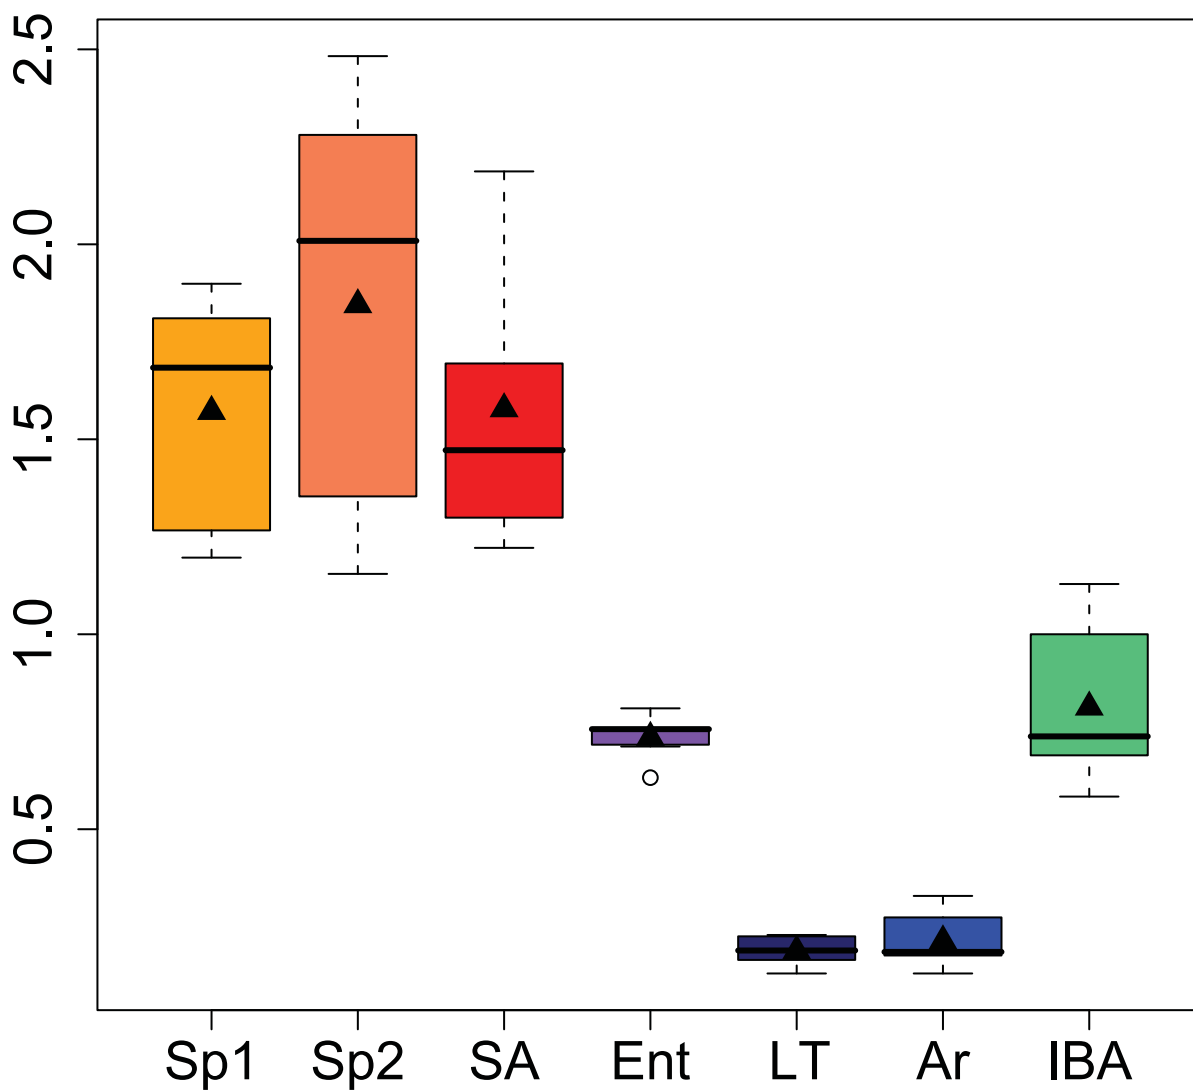



# N-acetylmethionine

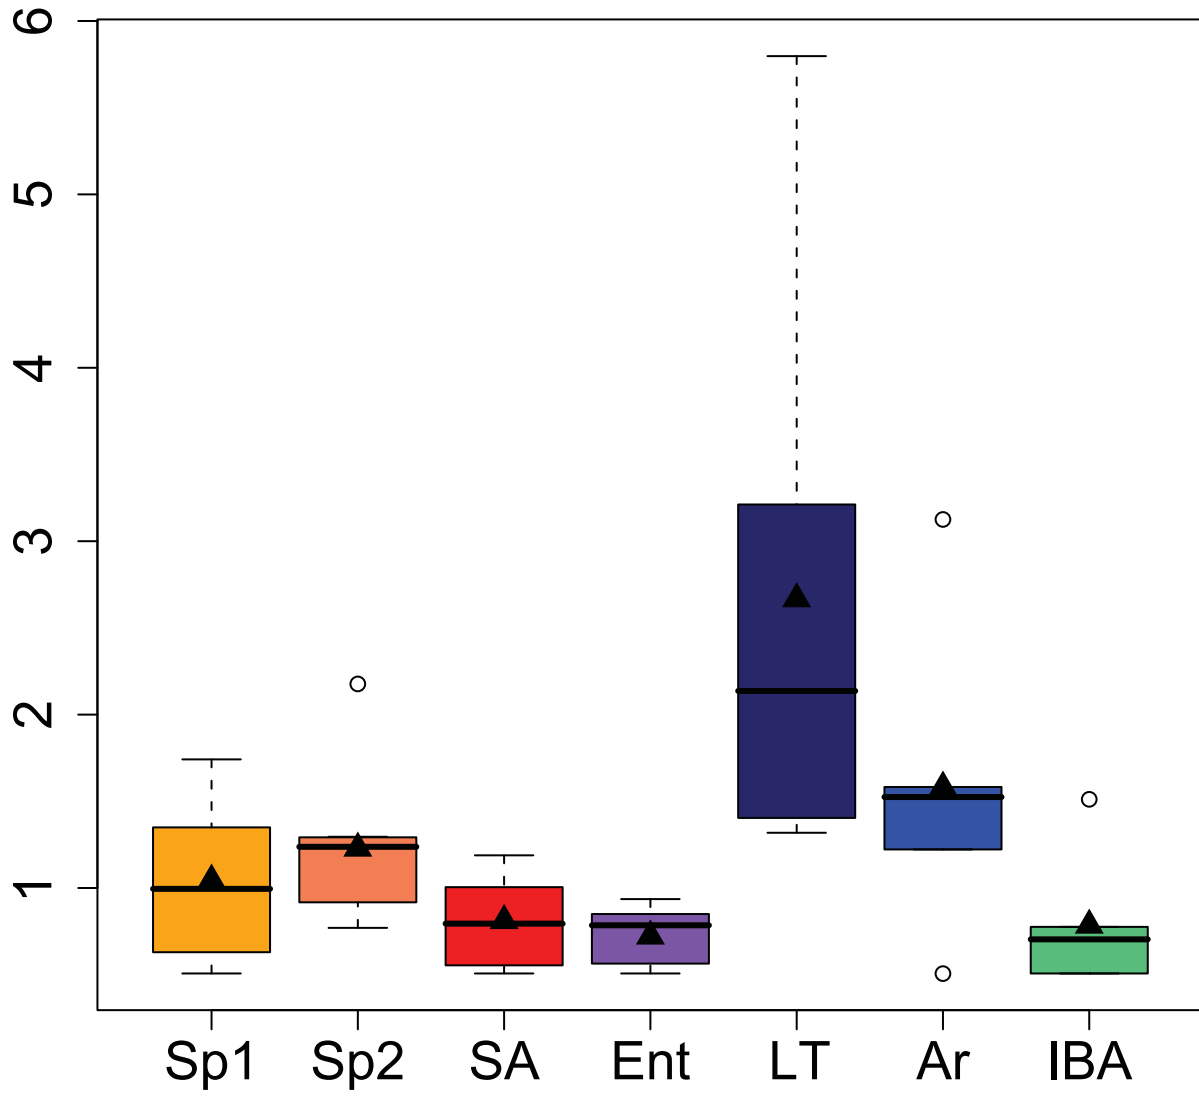

N-formylmethionine

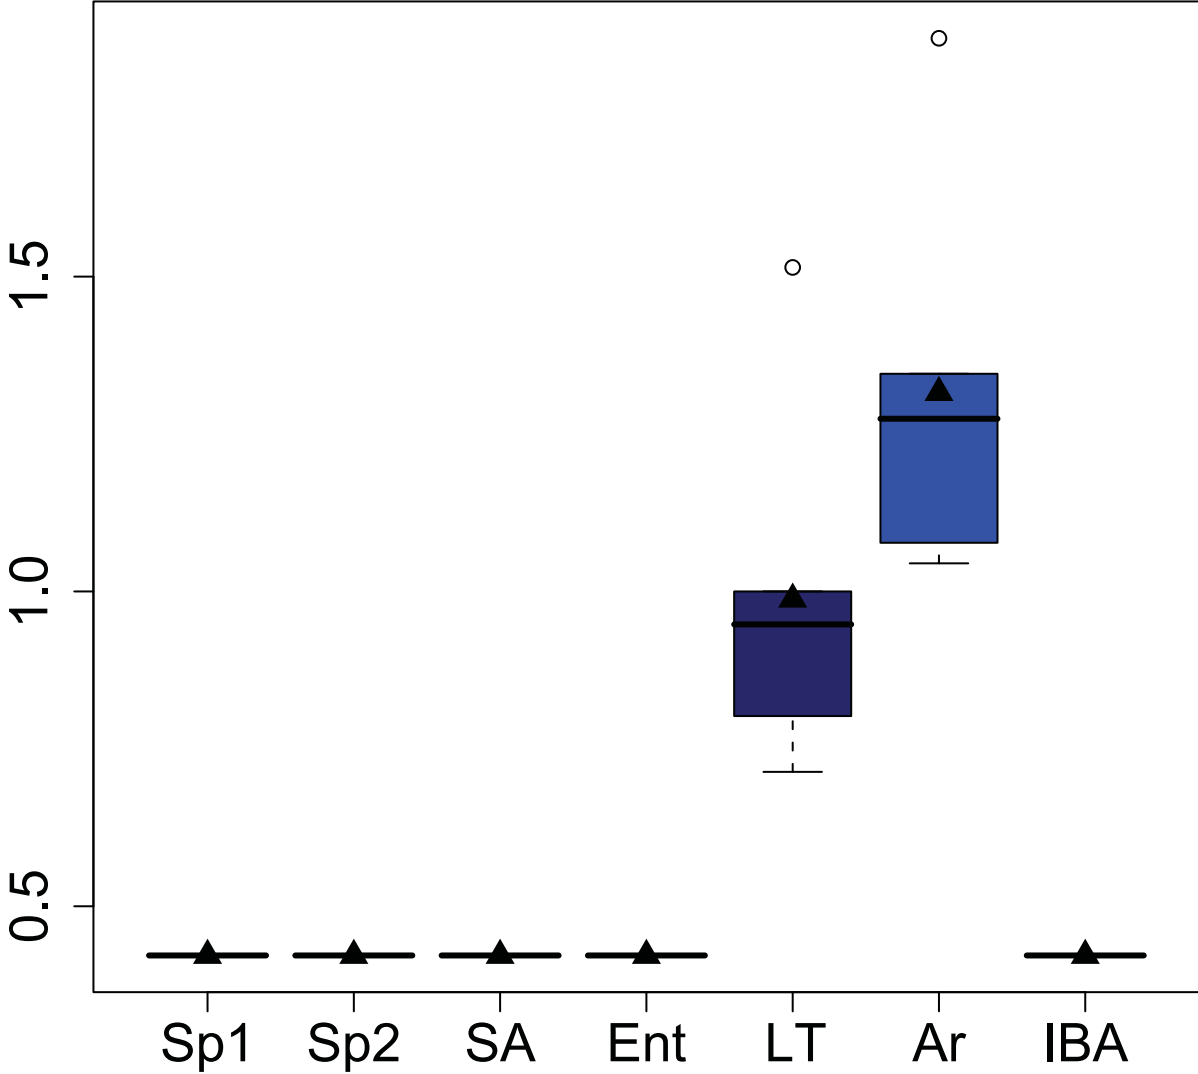

gamma-glutamylfelinylglycine\*

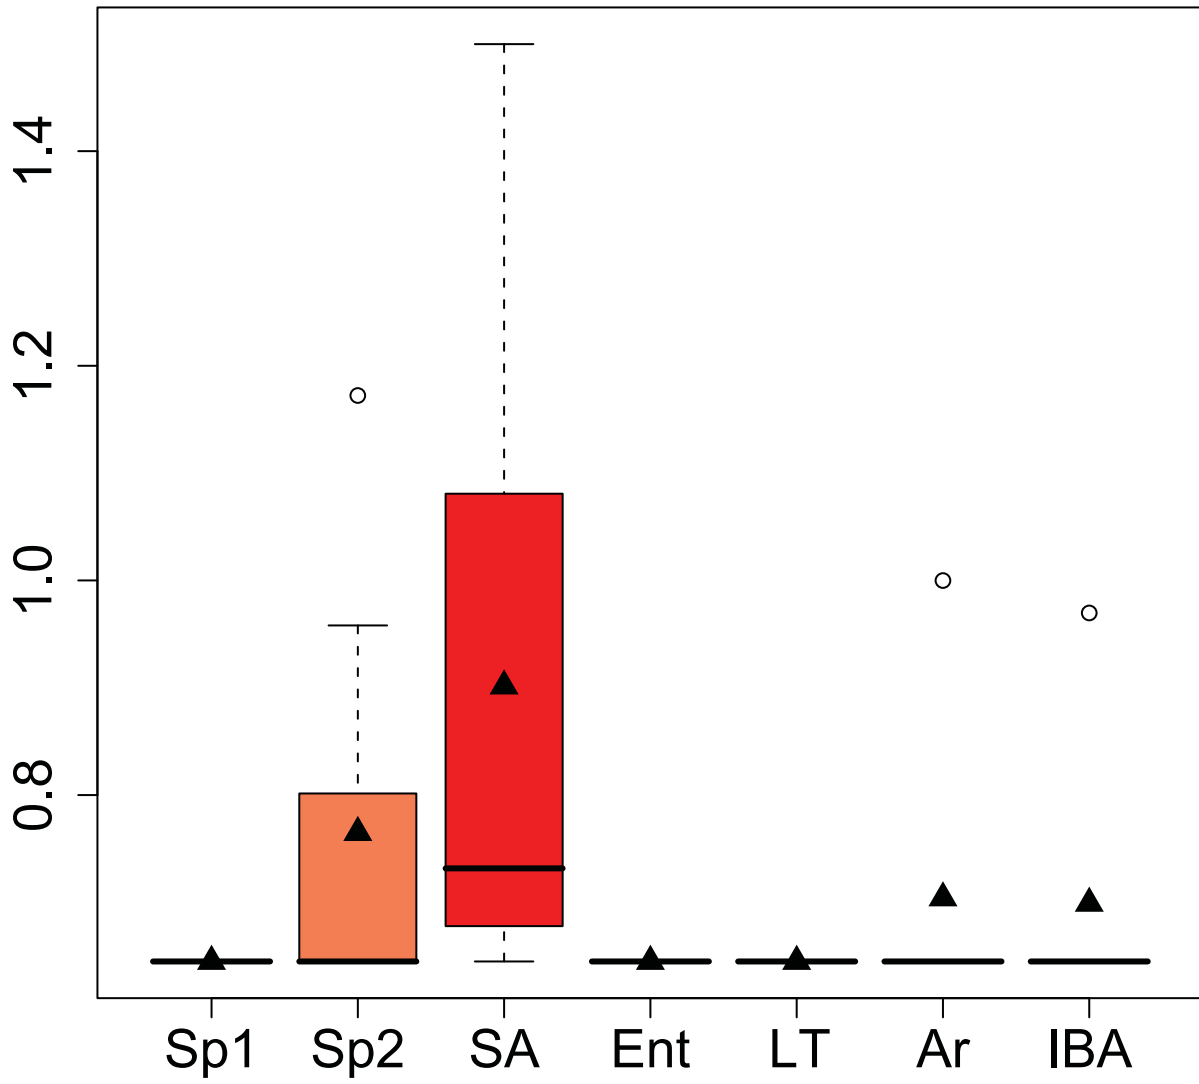

# glutamate

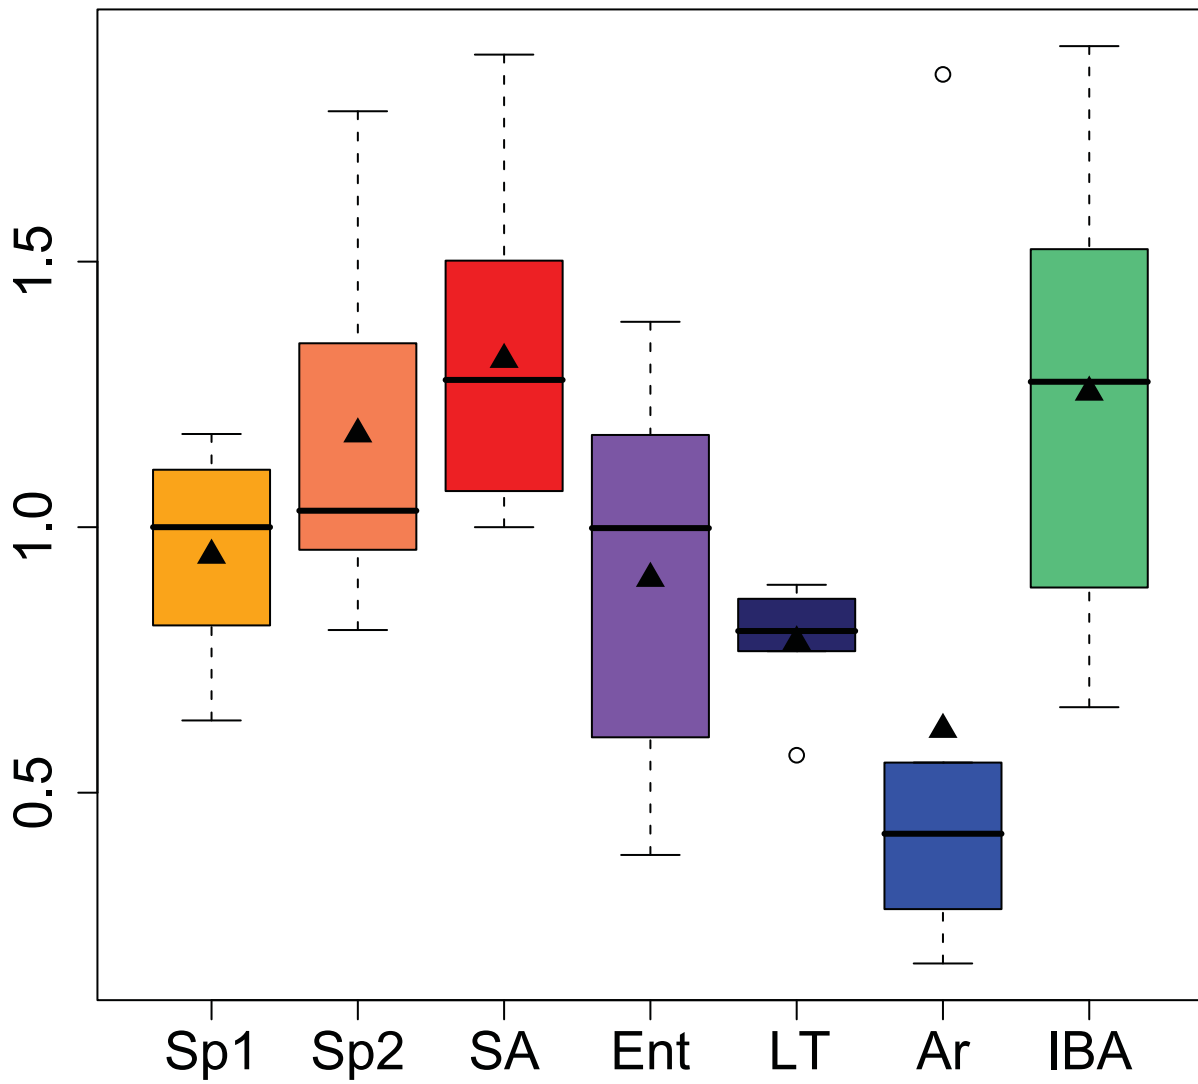

# glutamine

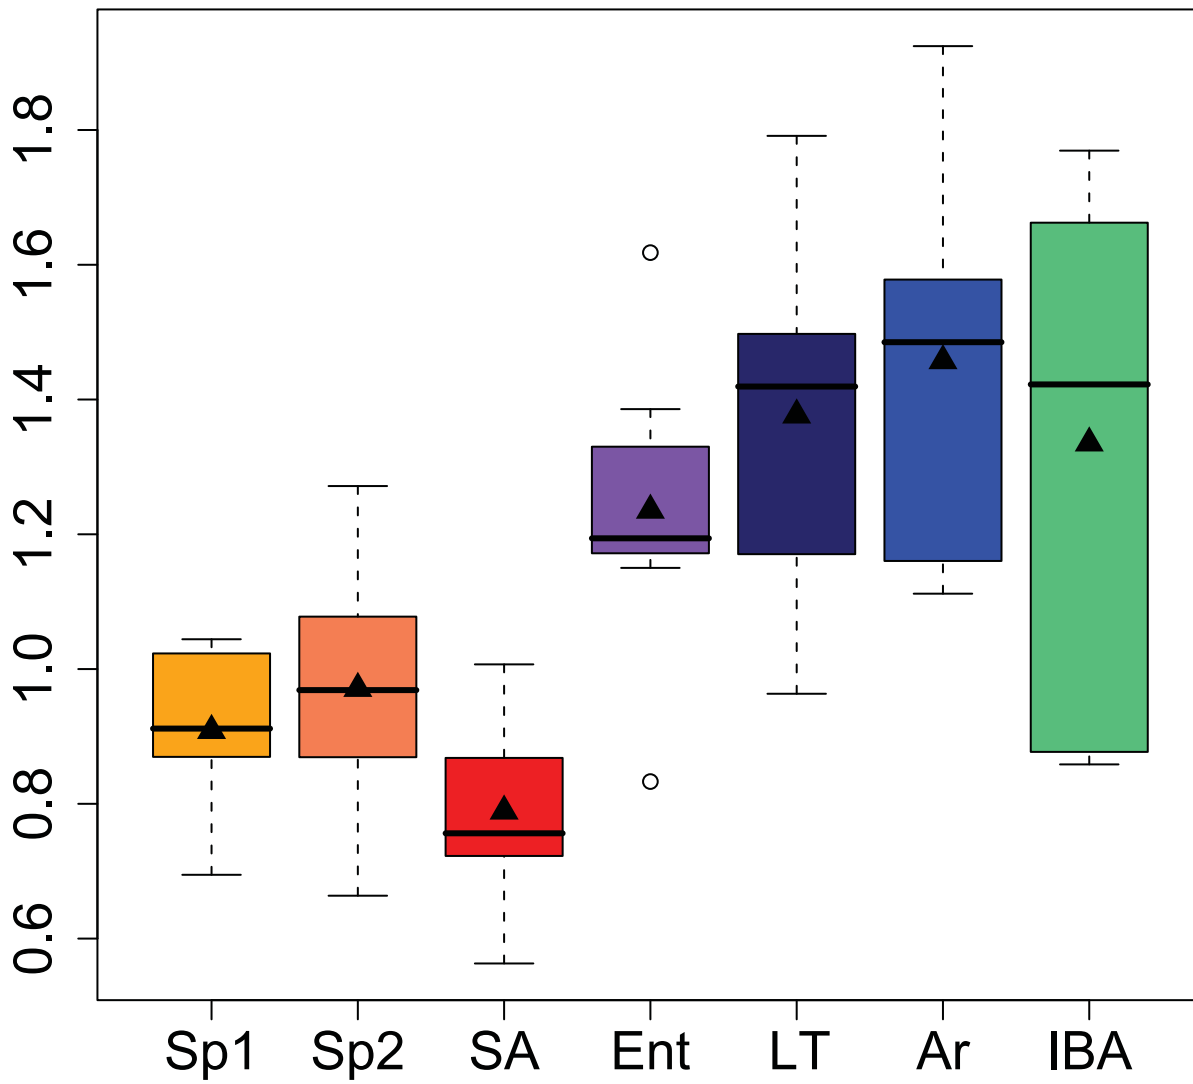

# N-acetylglutamine

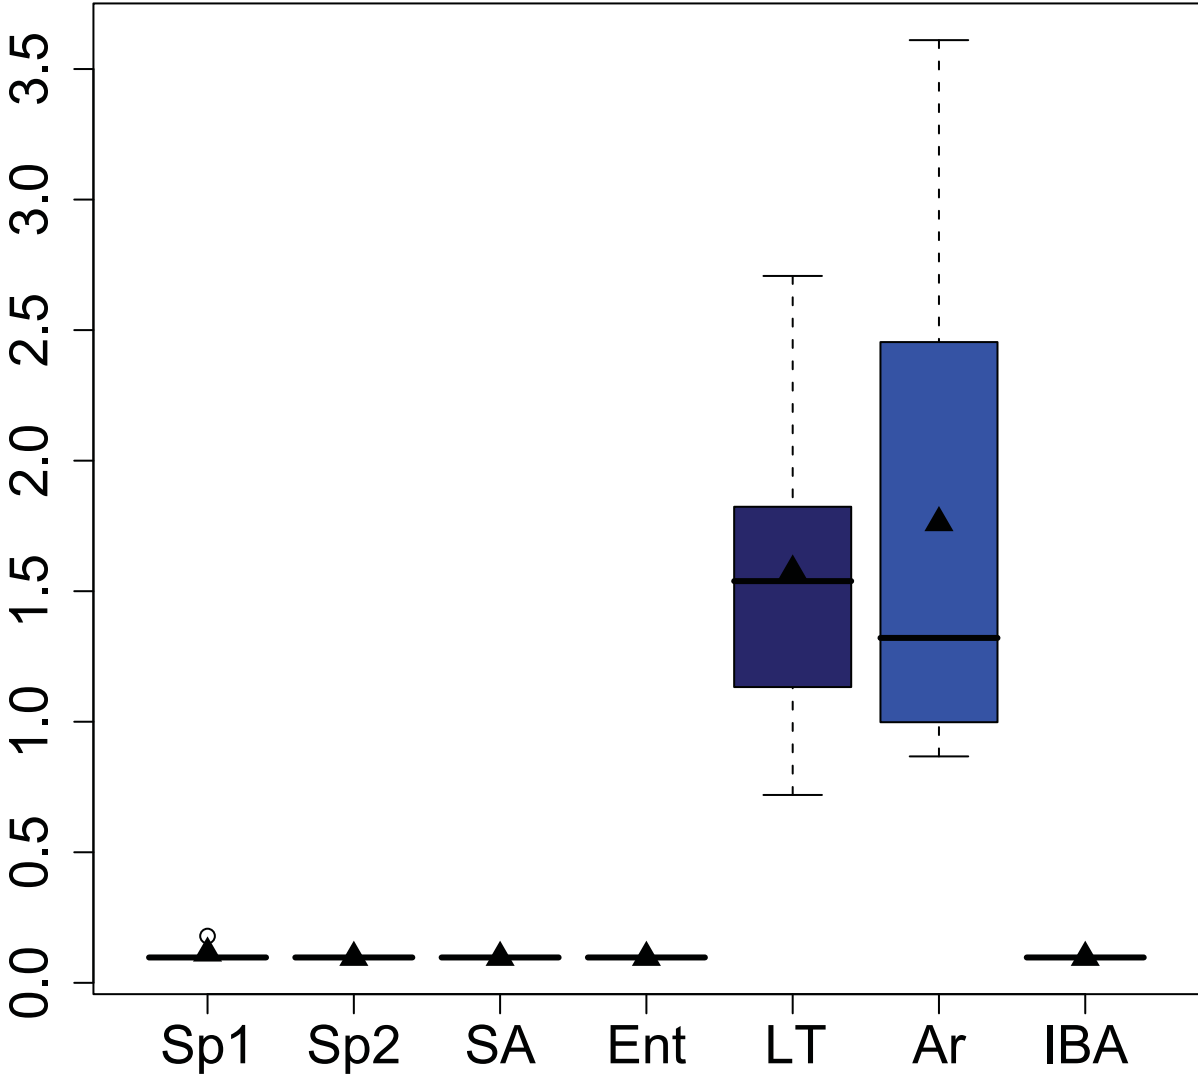

pyroglutamine\*

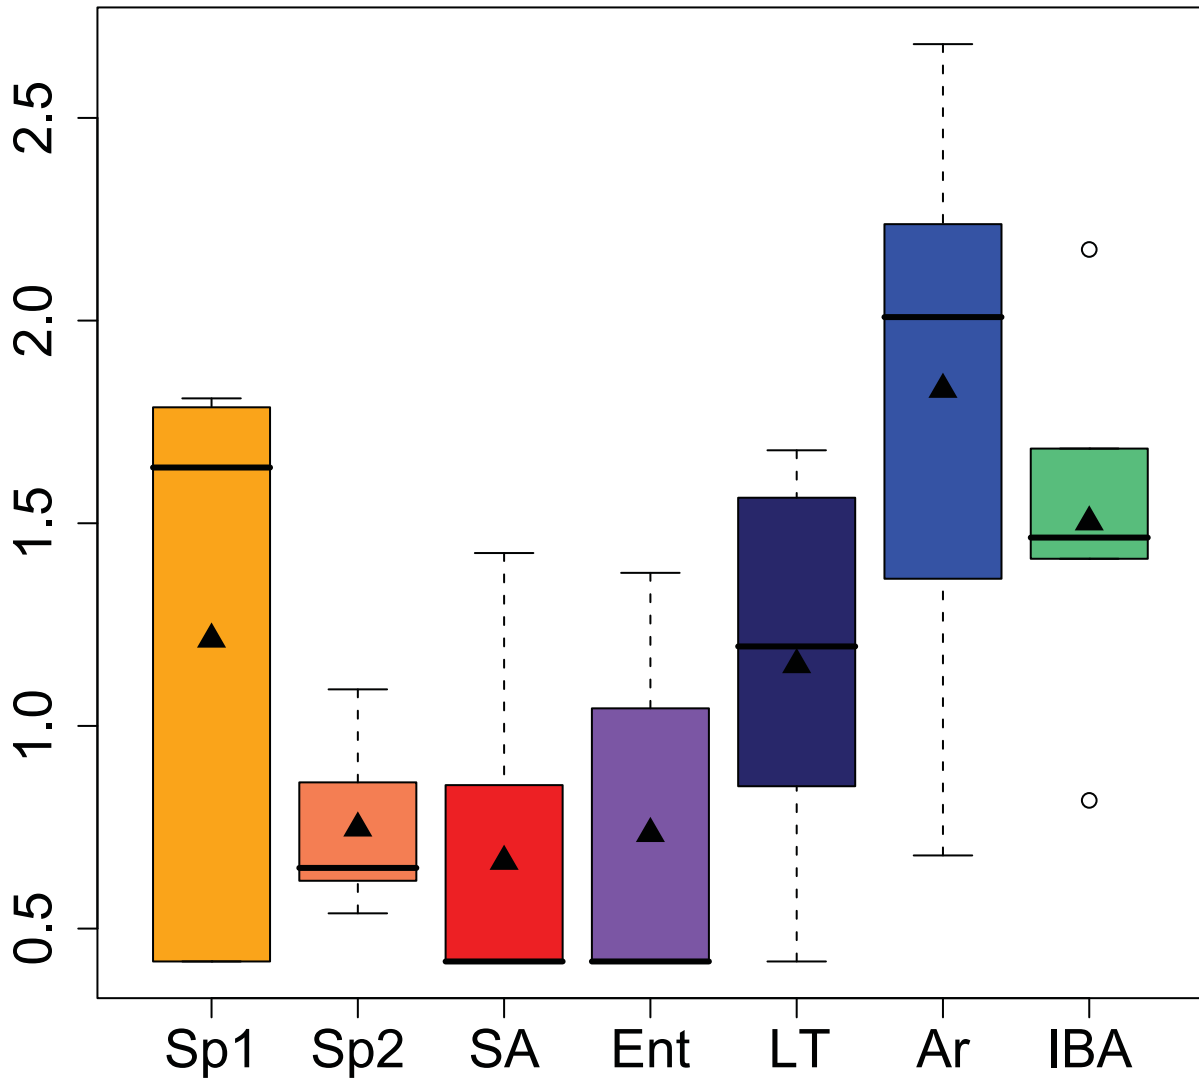

# cysteine-glutathione-disulfide

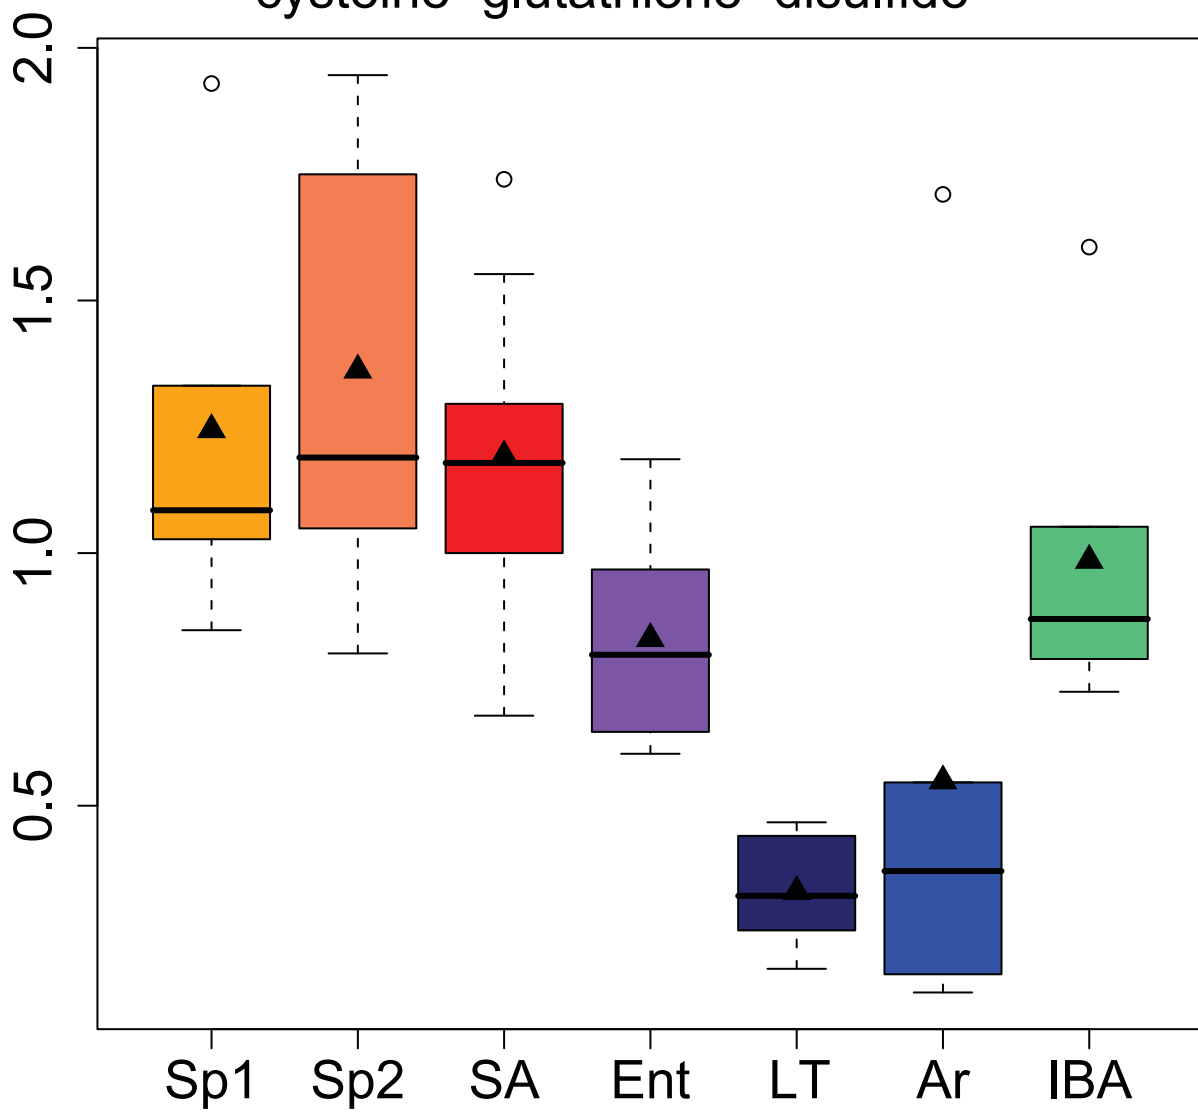



# glutathione, oxidized (GSSG)

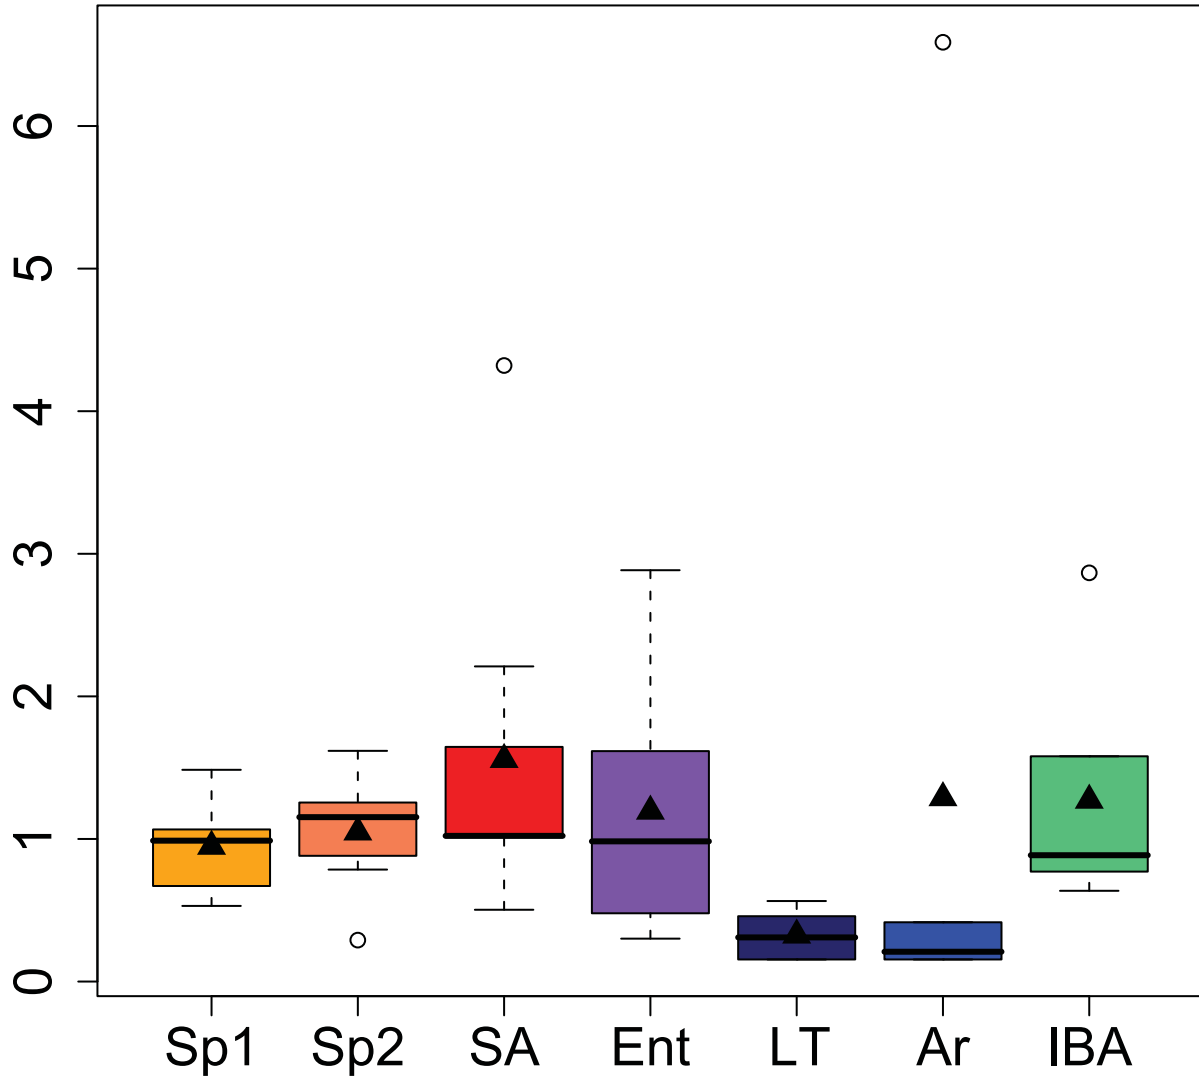

ophthalmate\*

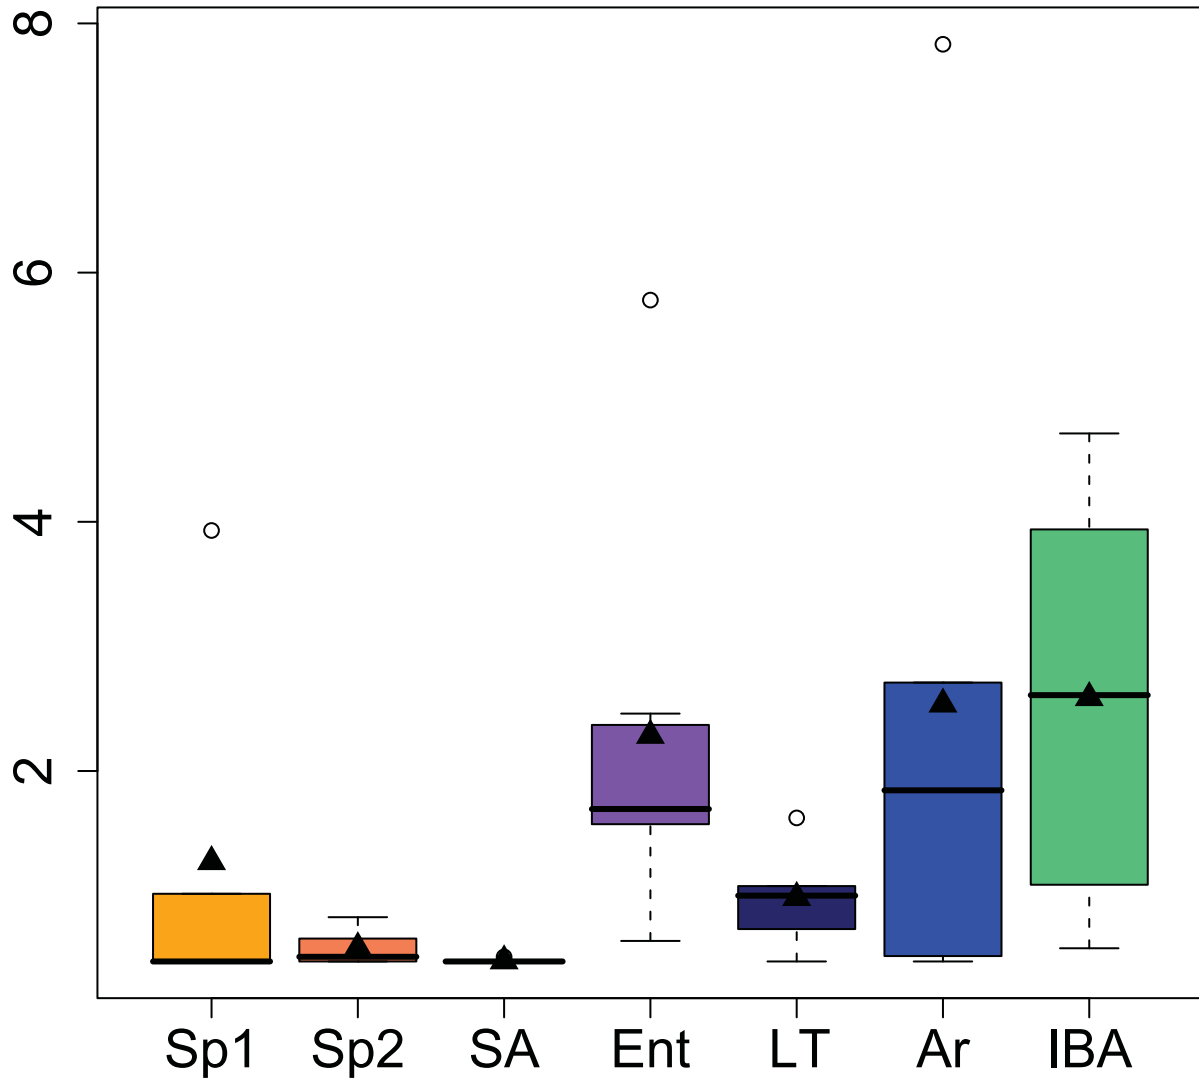

pyroglutamate (5-oxoproline)

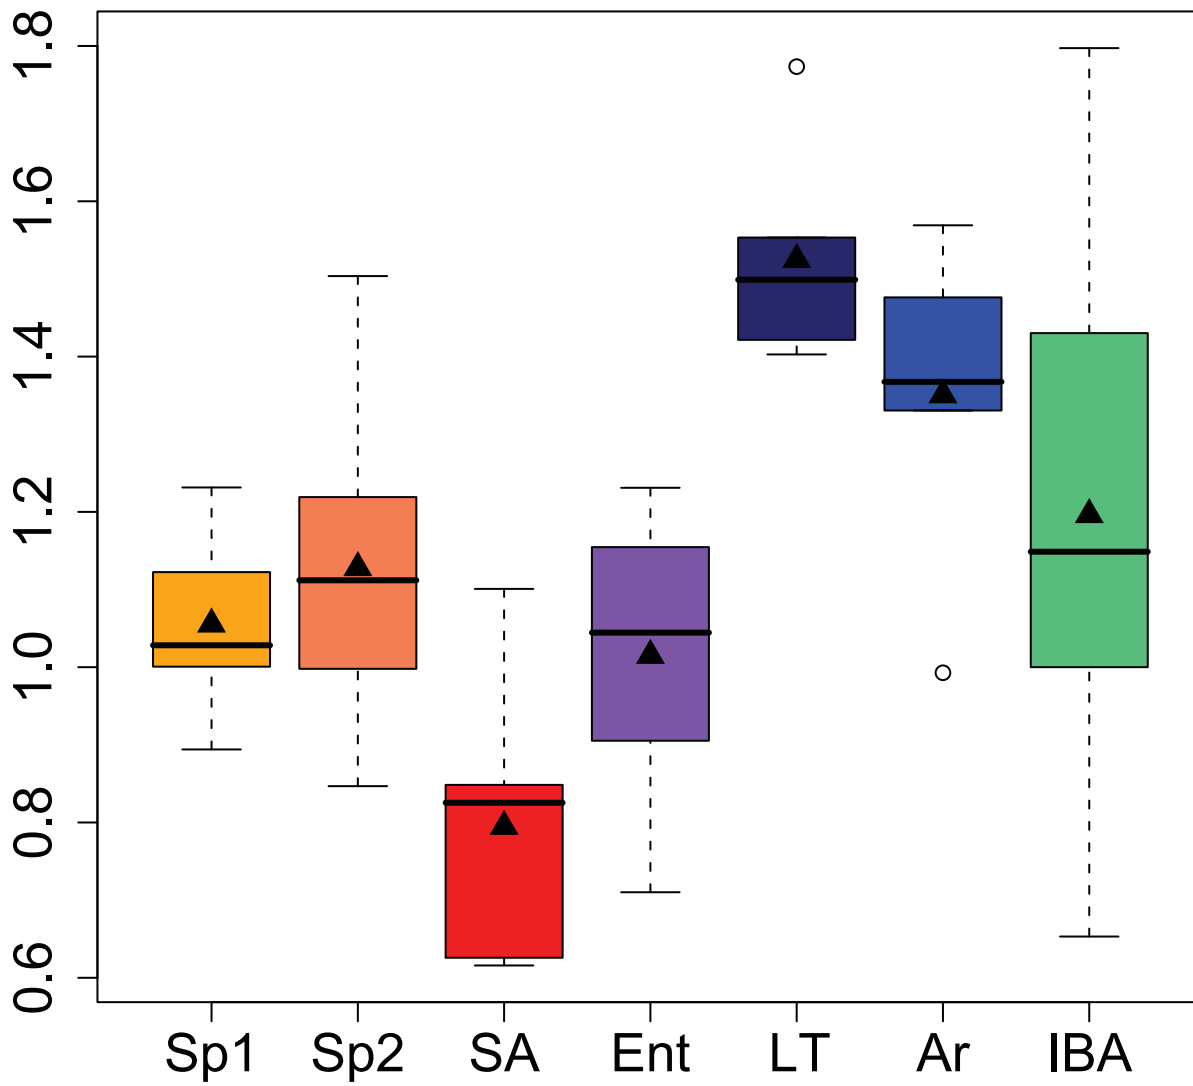

# betaine

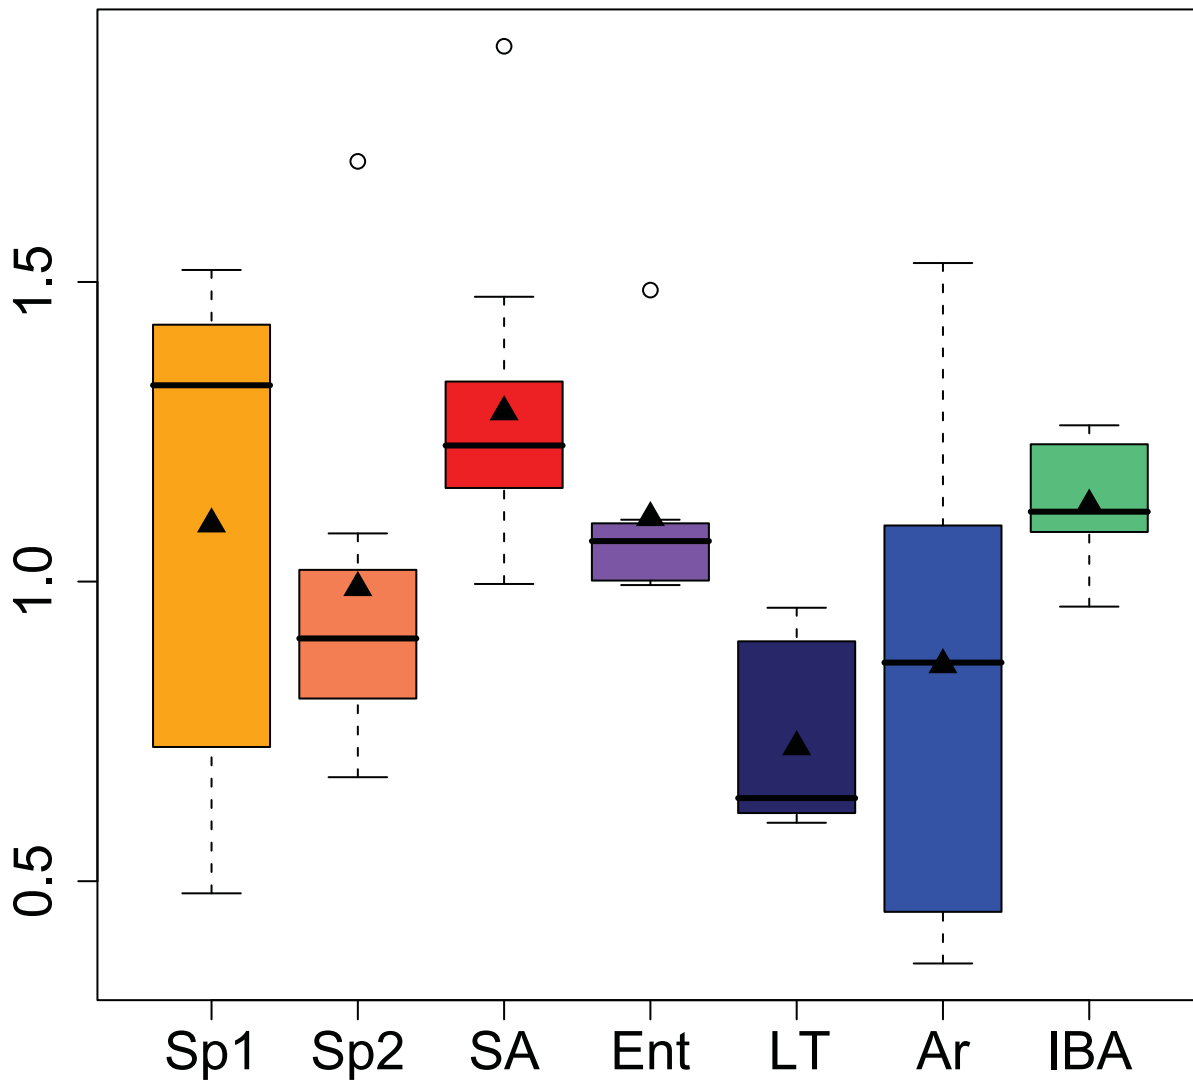

# glycine

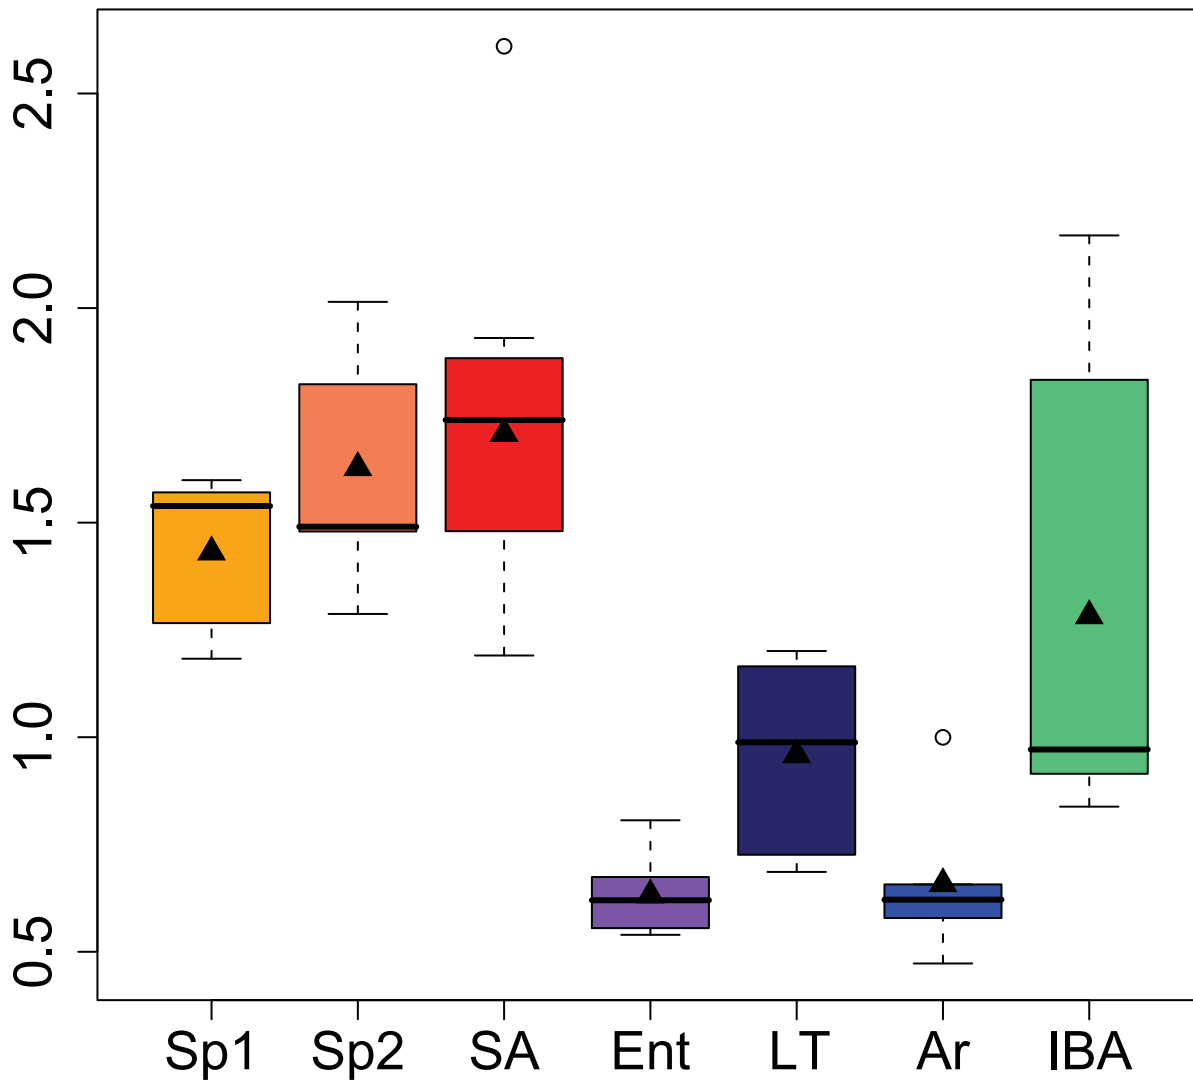

# N-acetylglycine

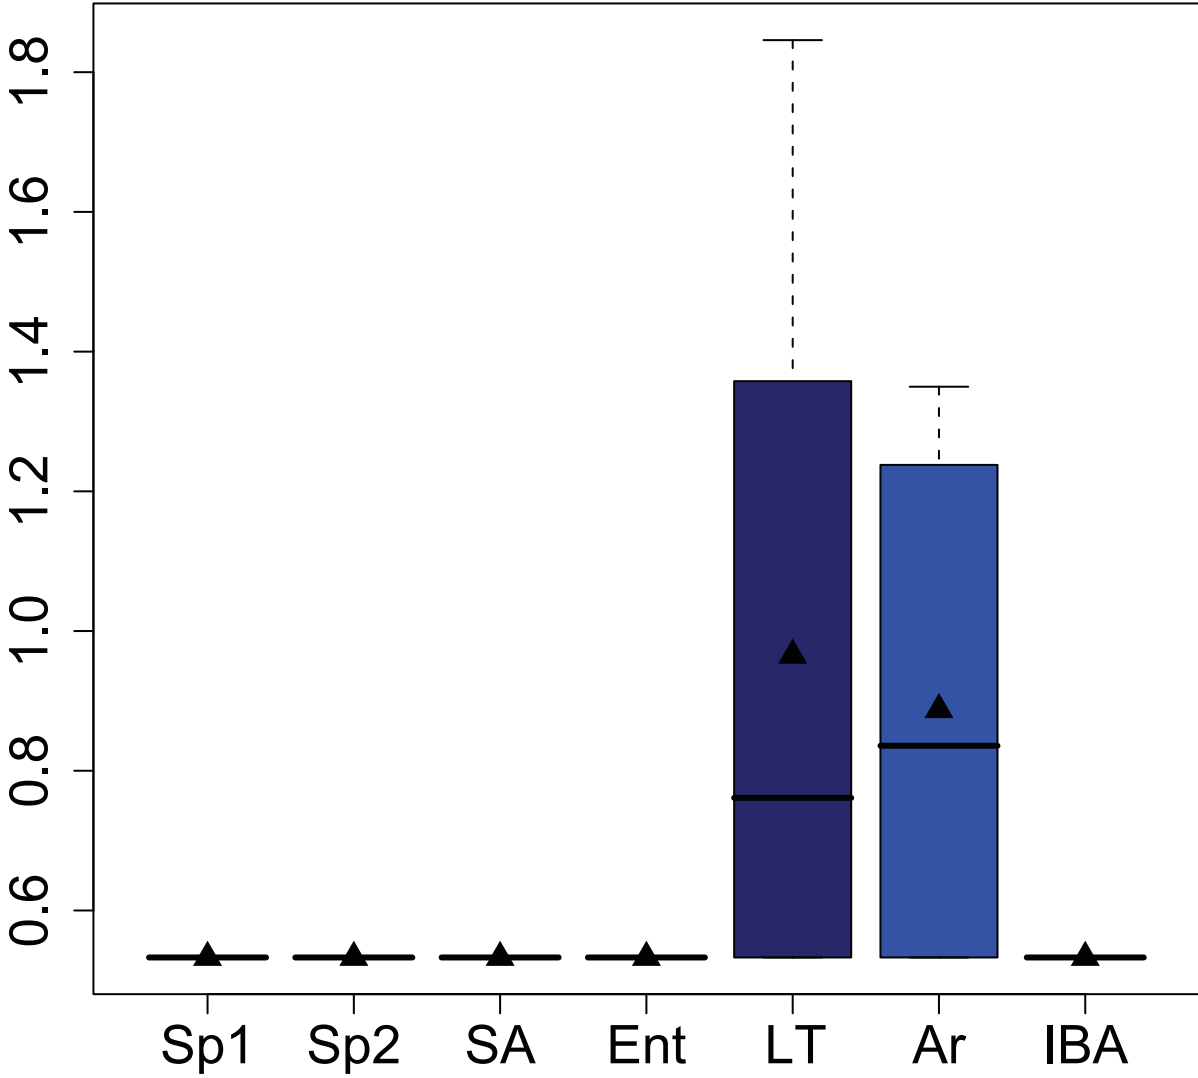

# N-acetylthreonine

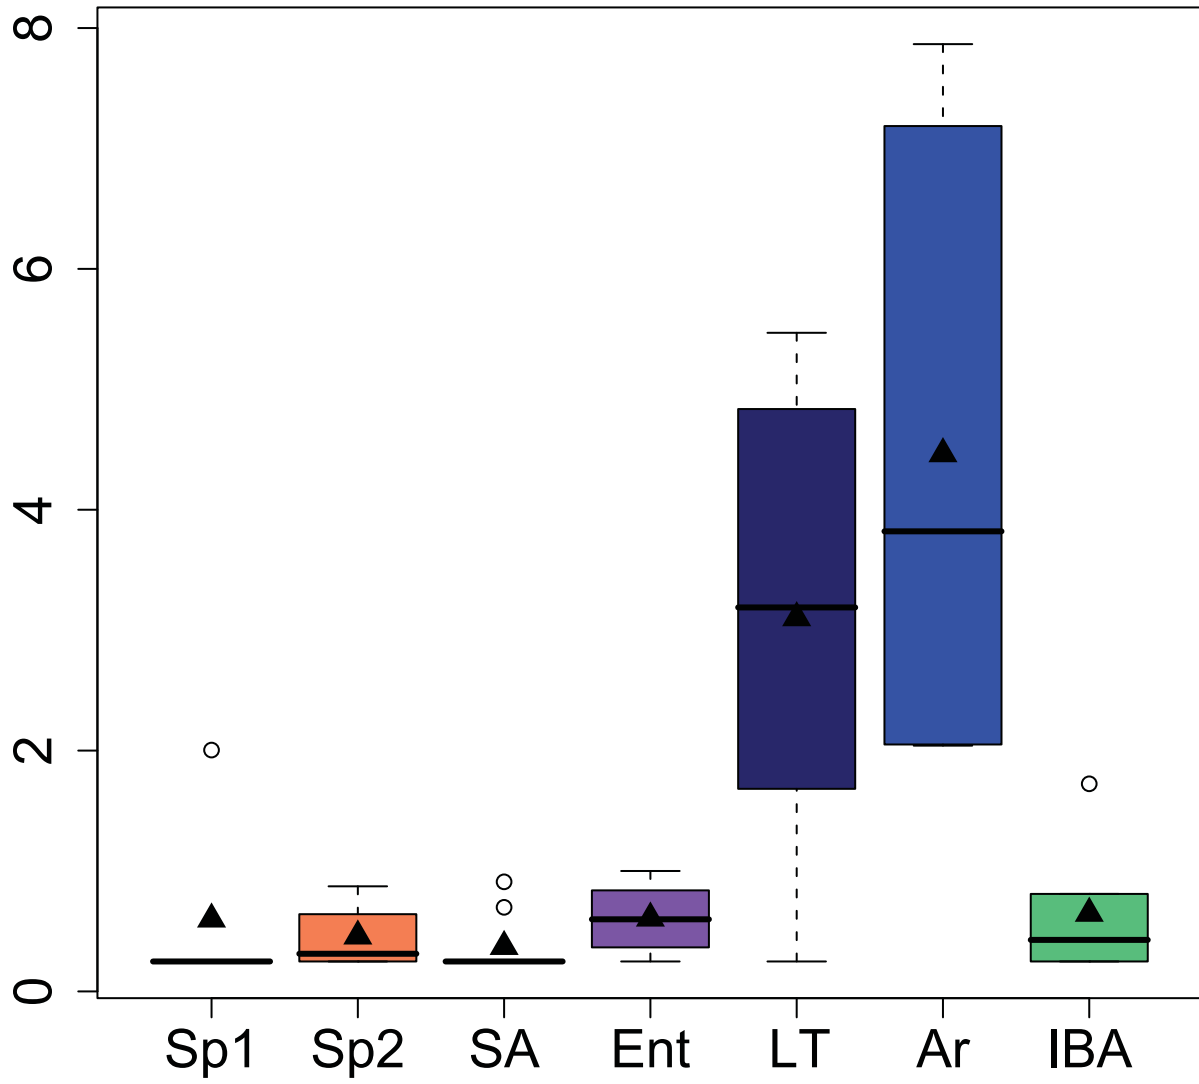

# serine

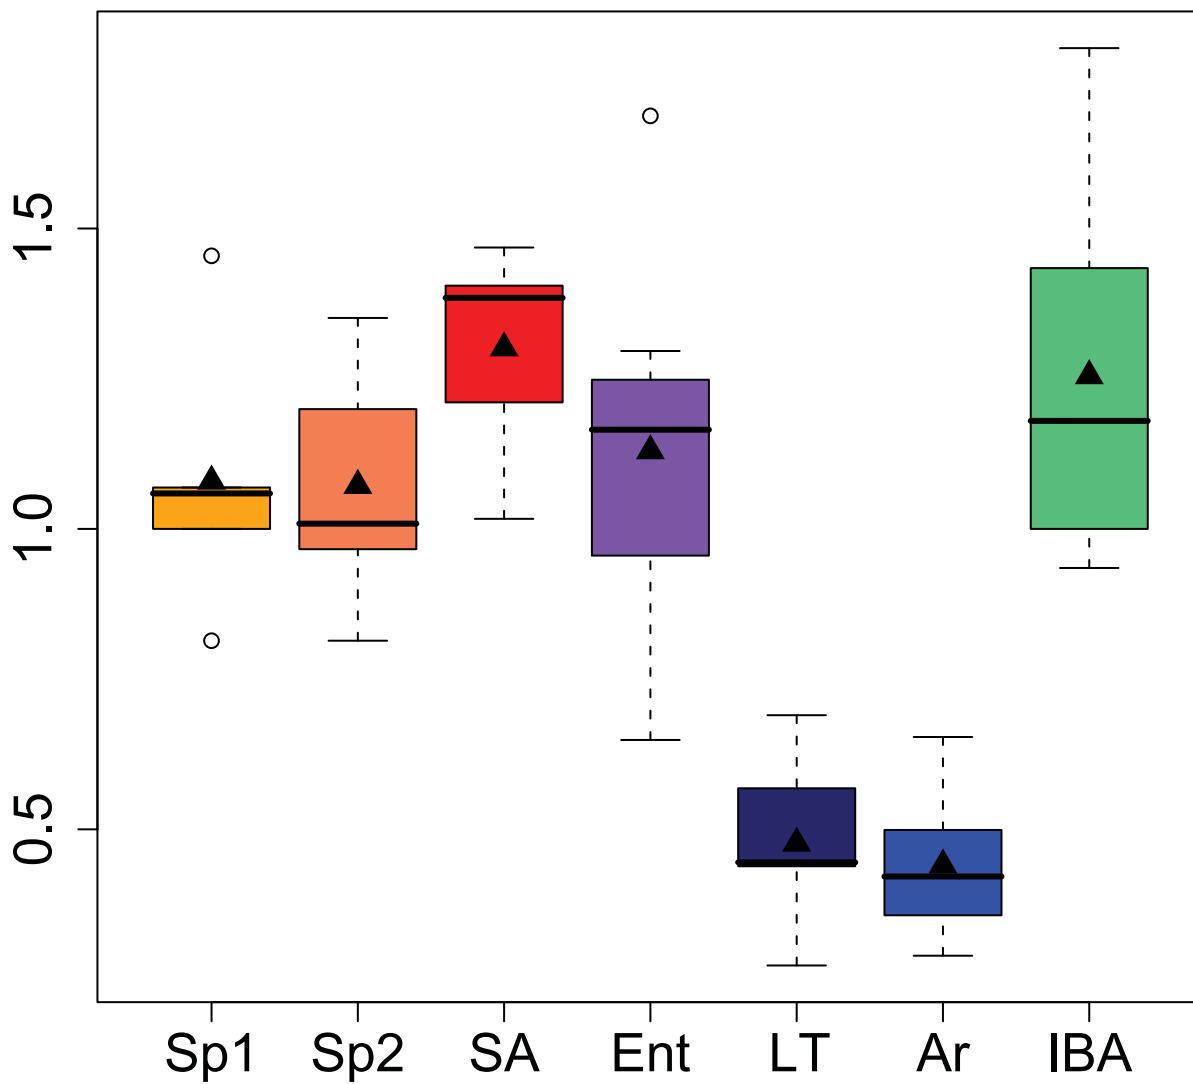



# threonine

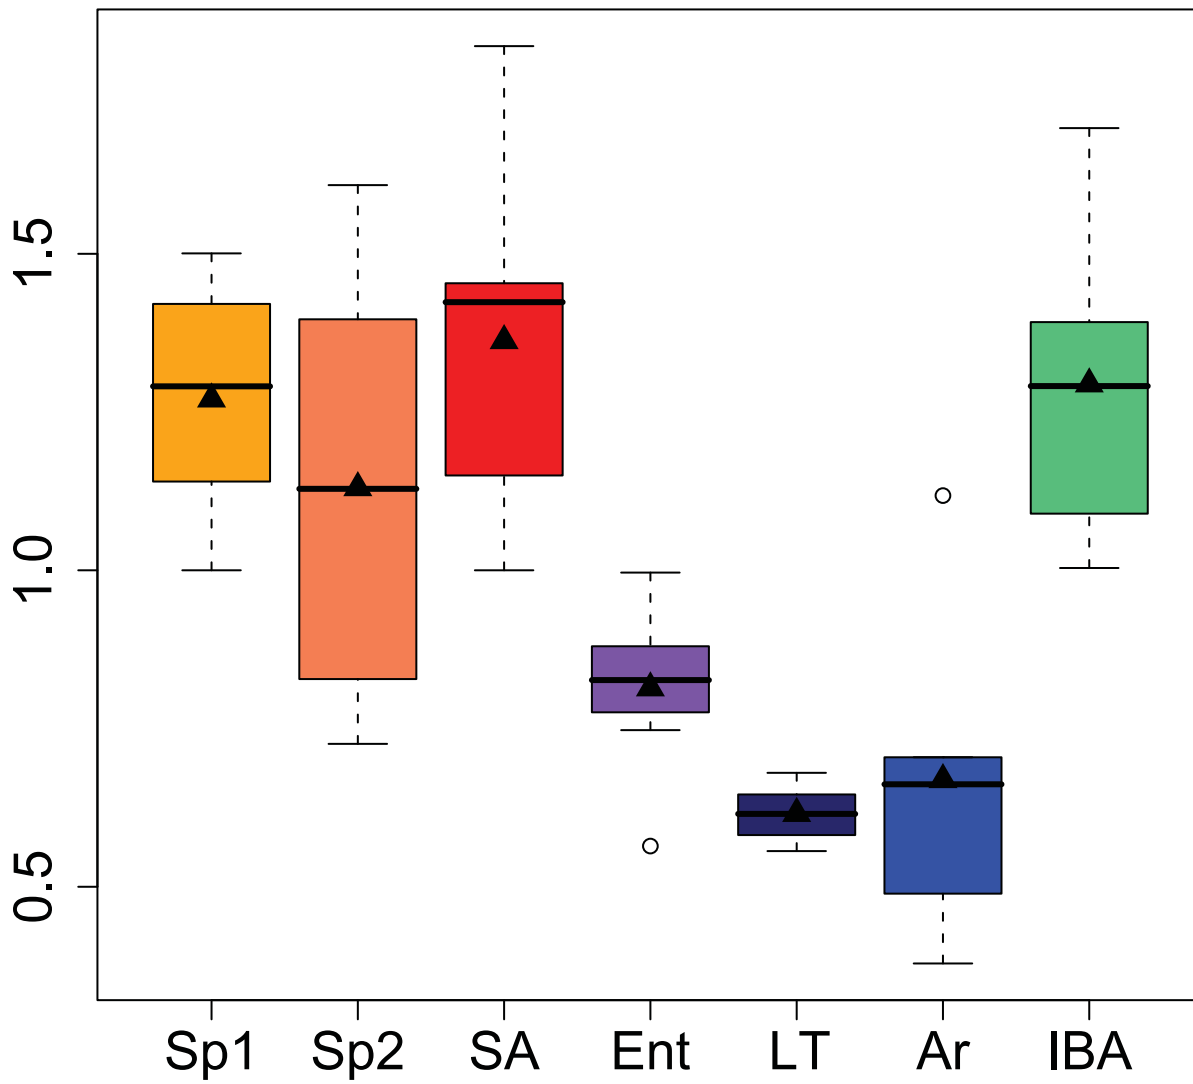

# 4-acetamidobutanoate

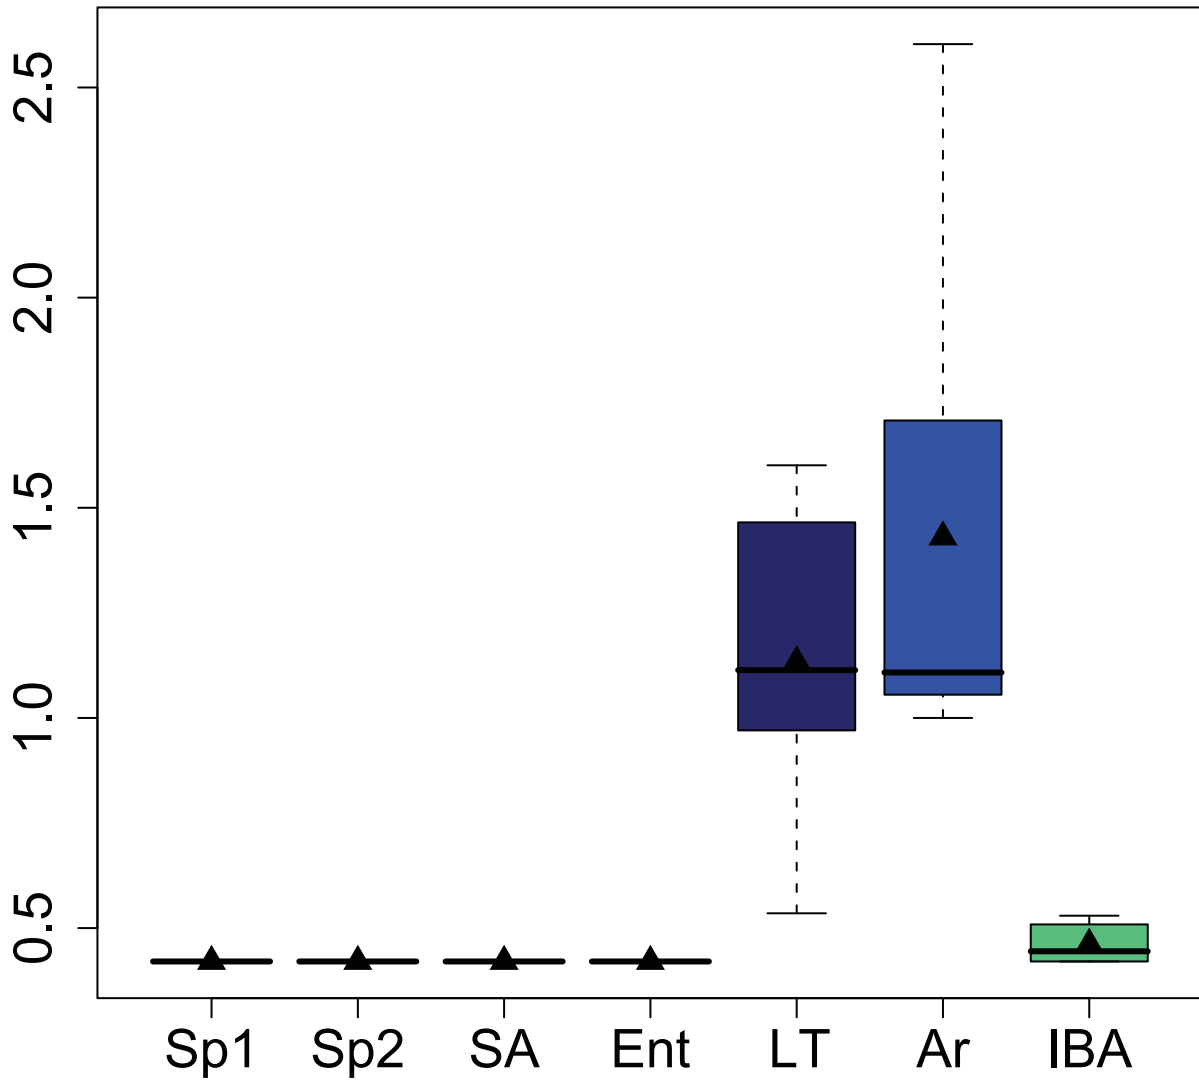

# 4-guanidinobutanoate

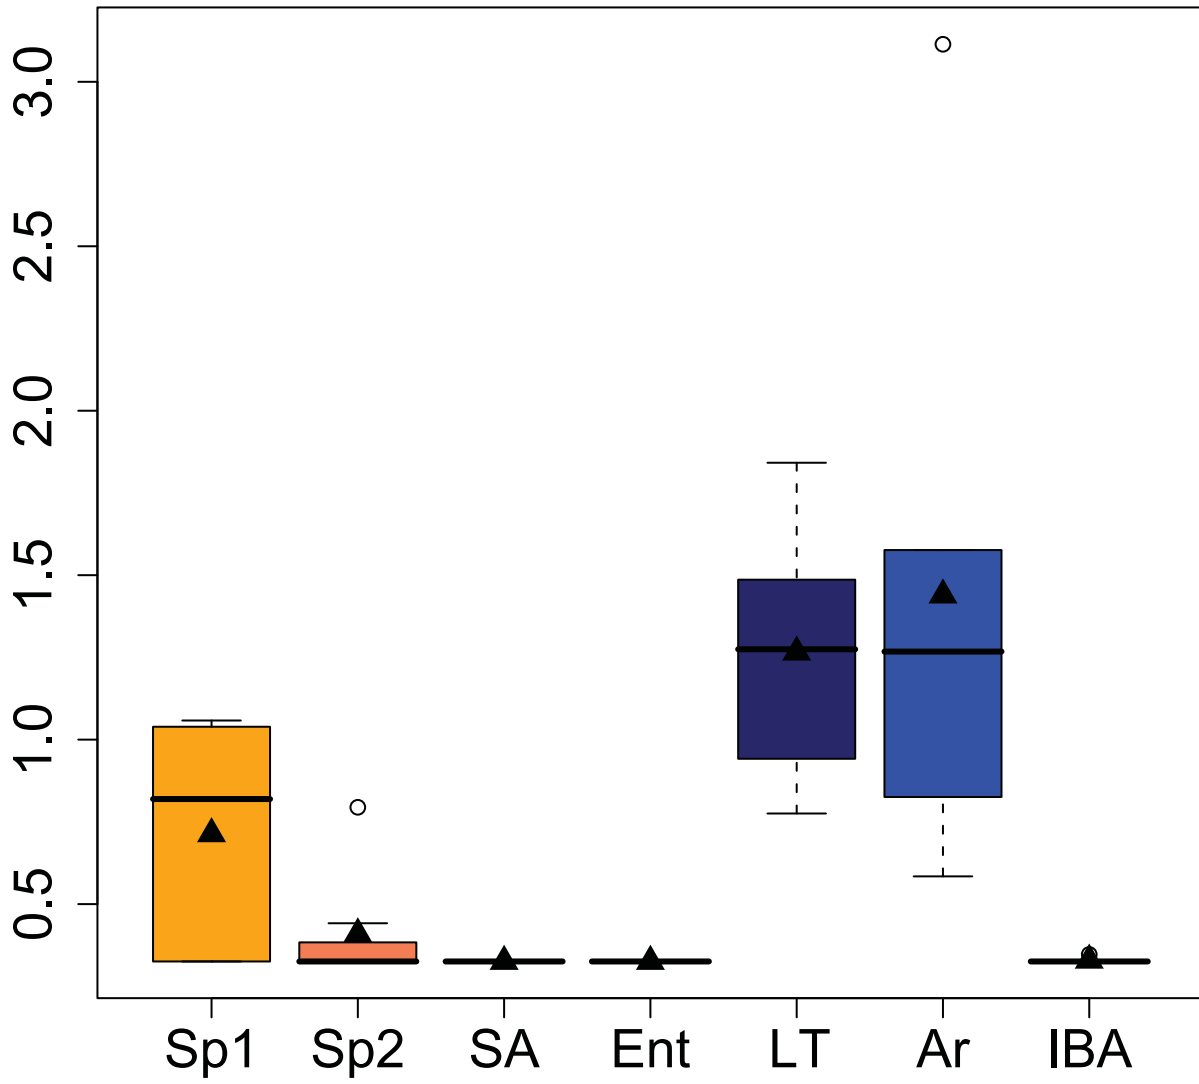

# histidine

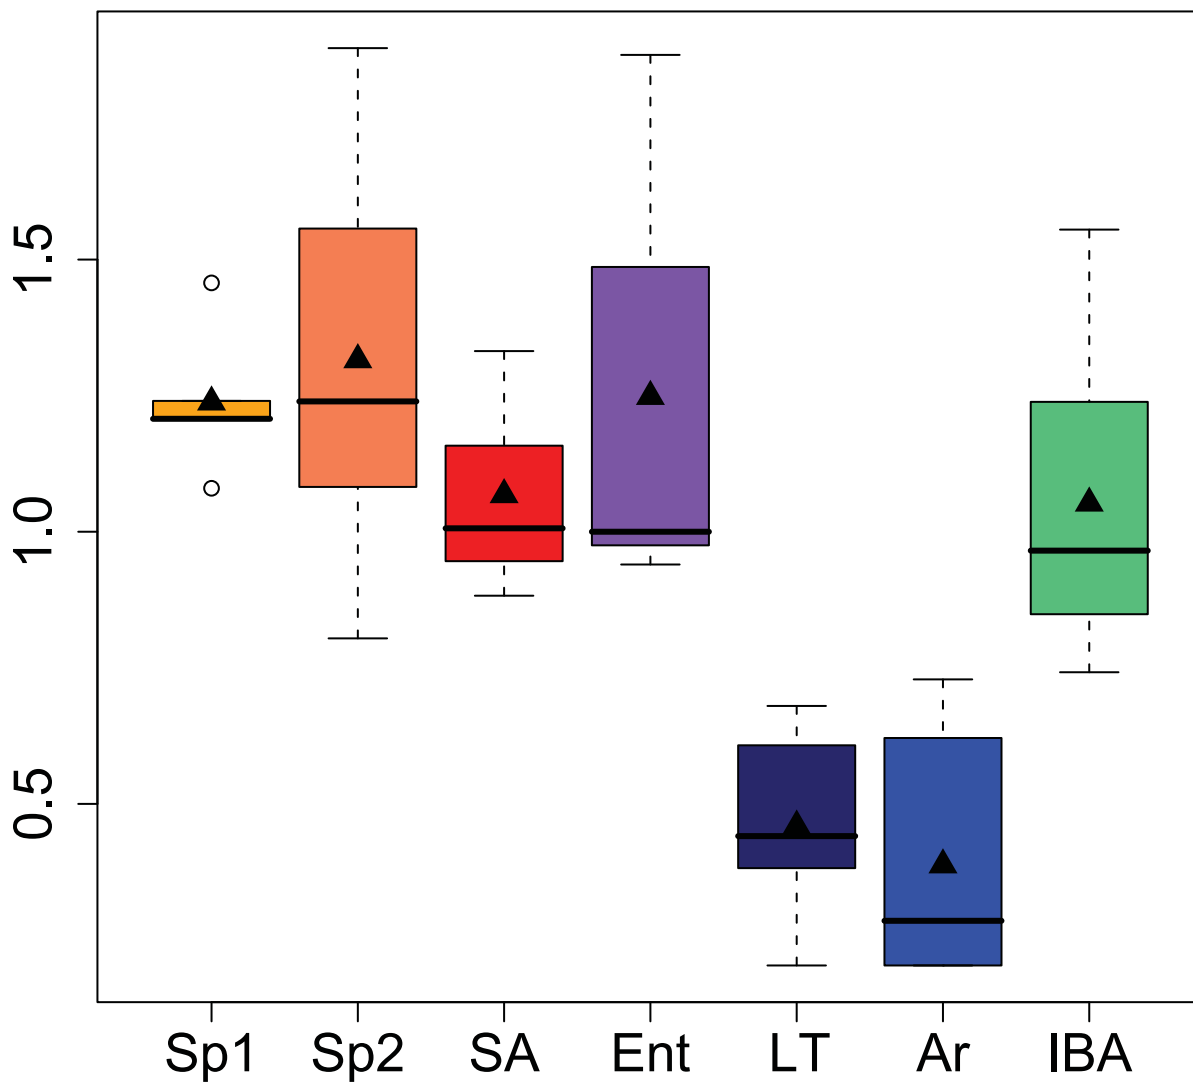

# urocanate

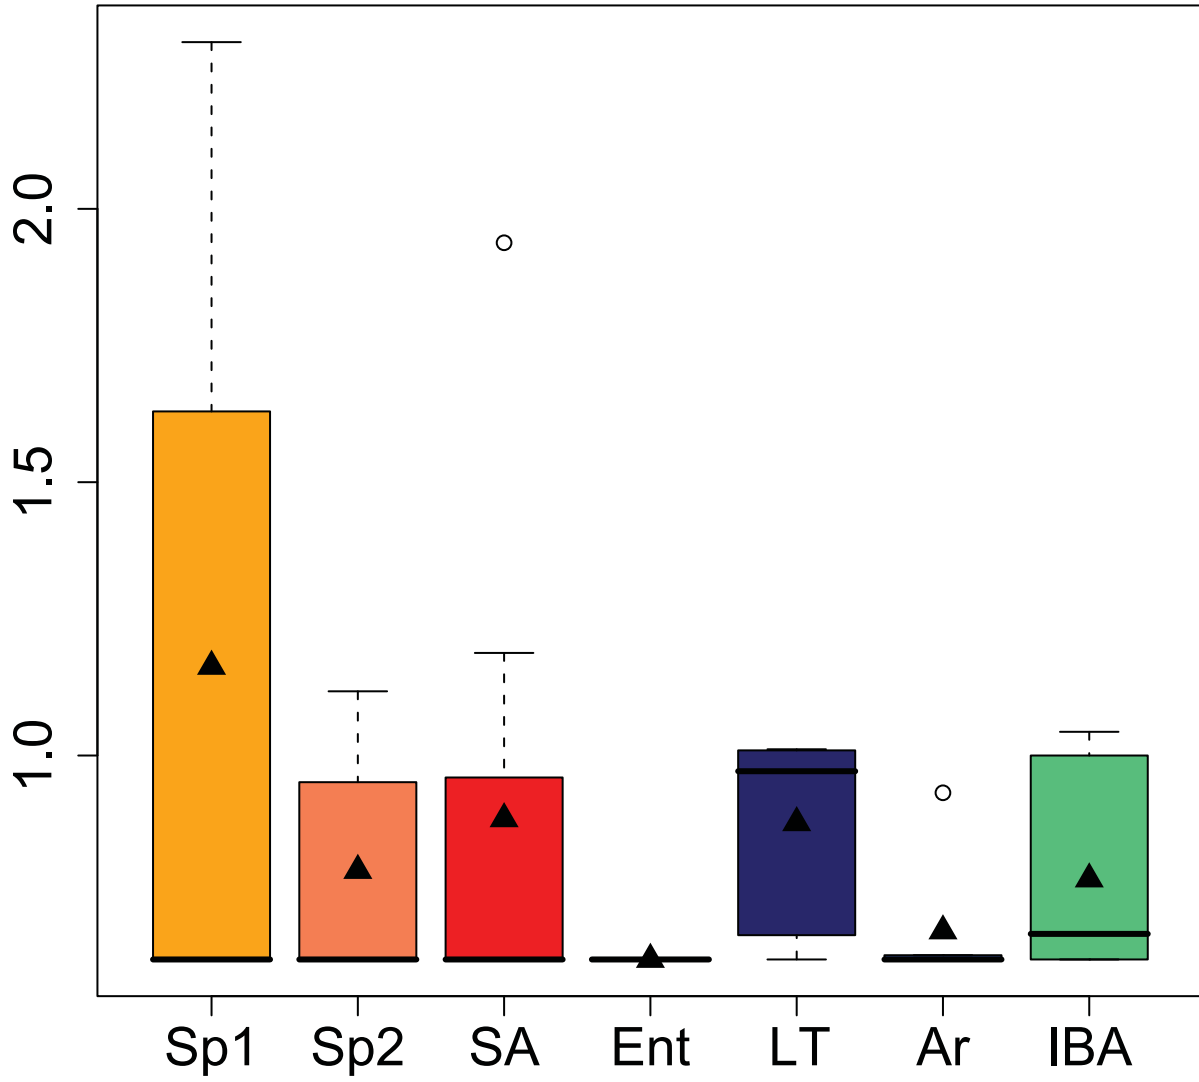

# lysine

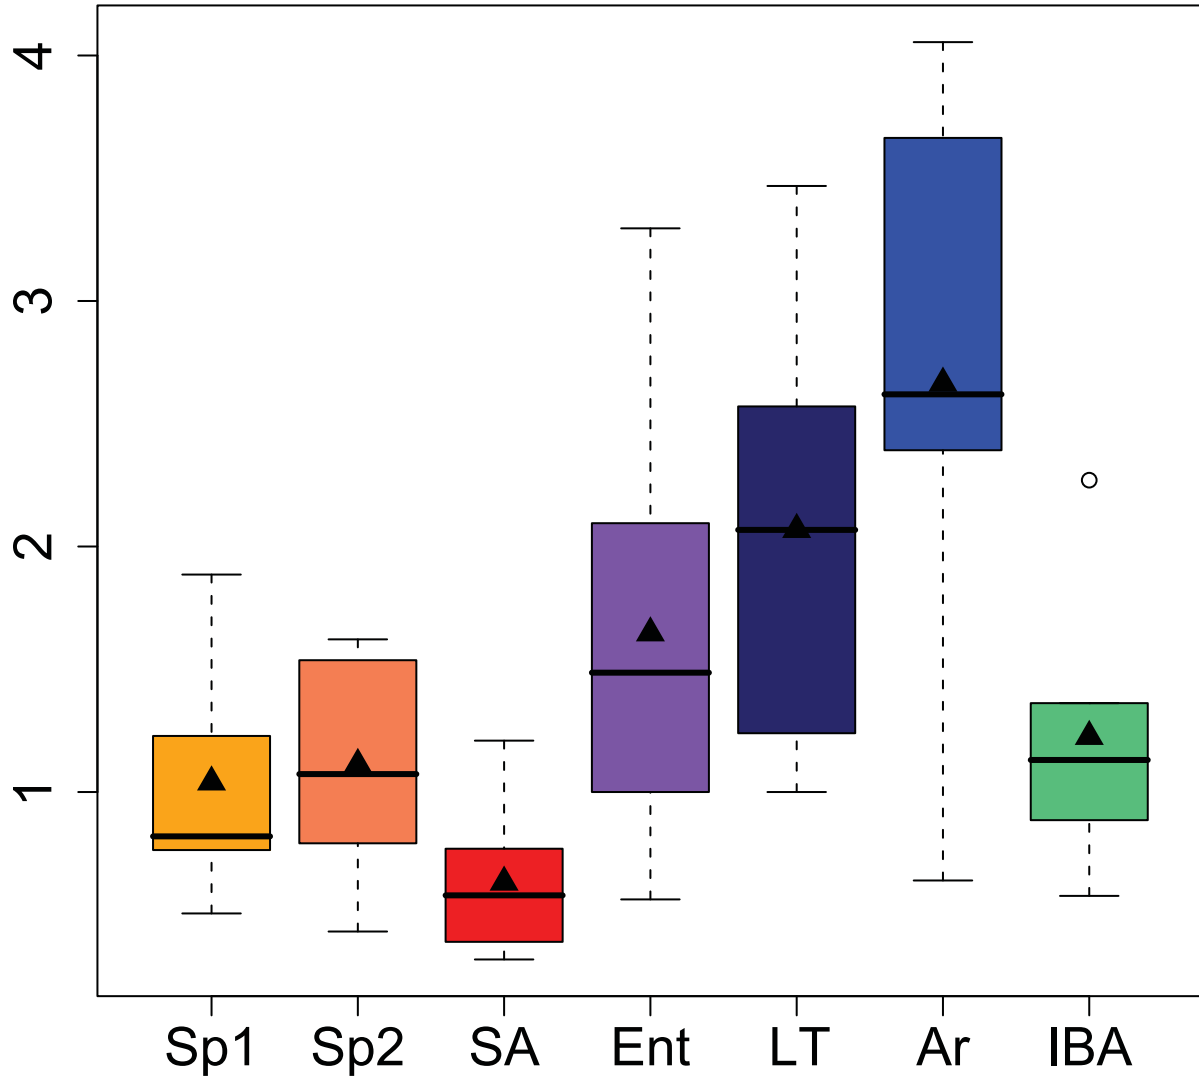

# pipecolate

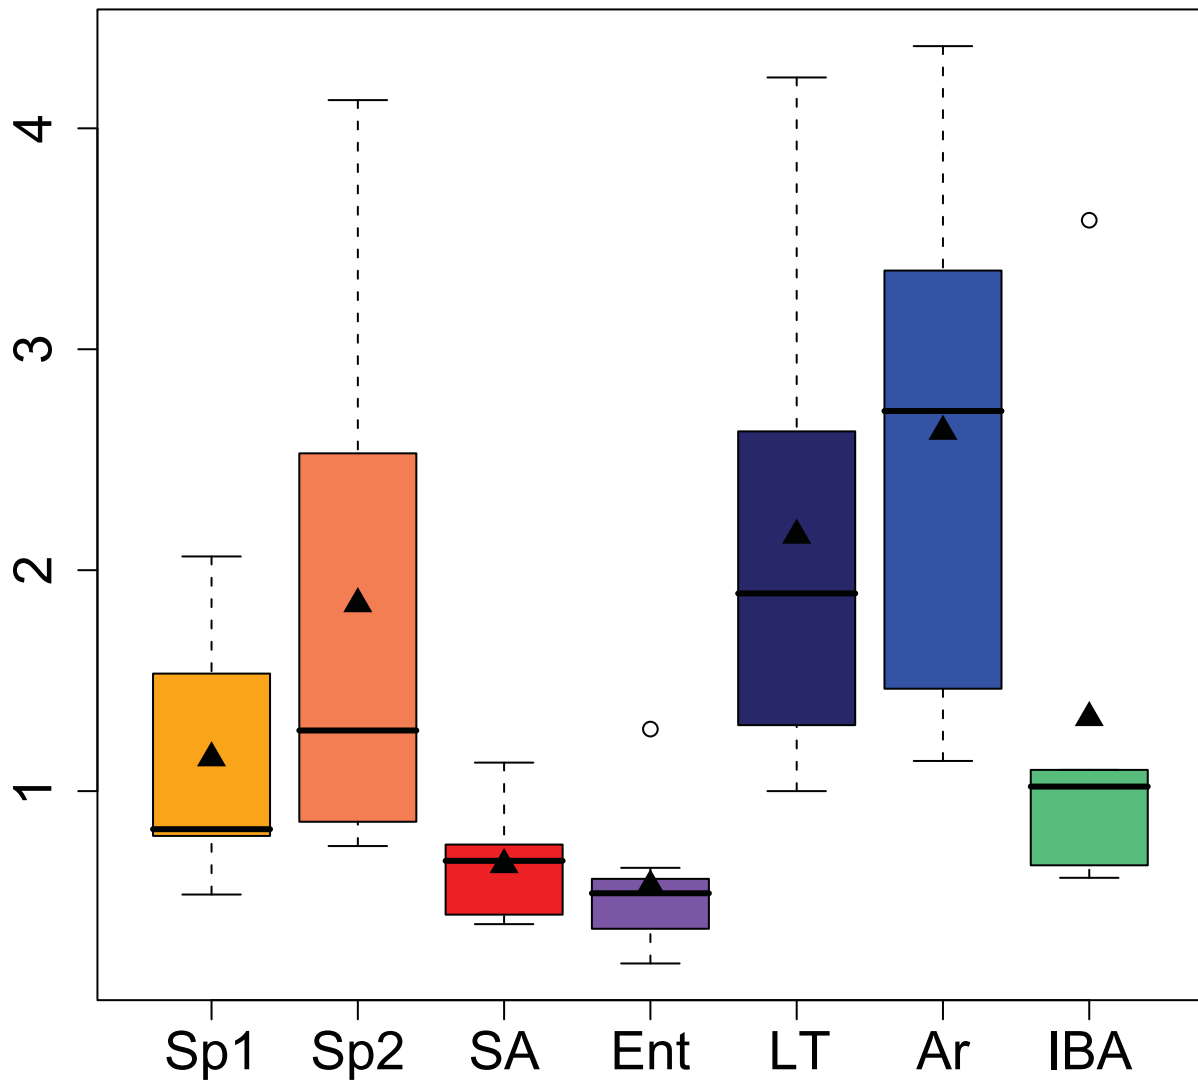

### 3-3-hydroxyphenyl-propionate

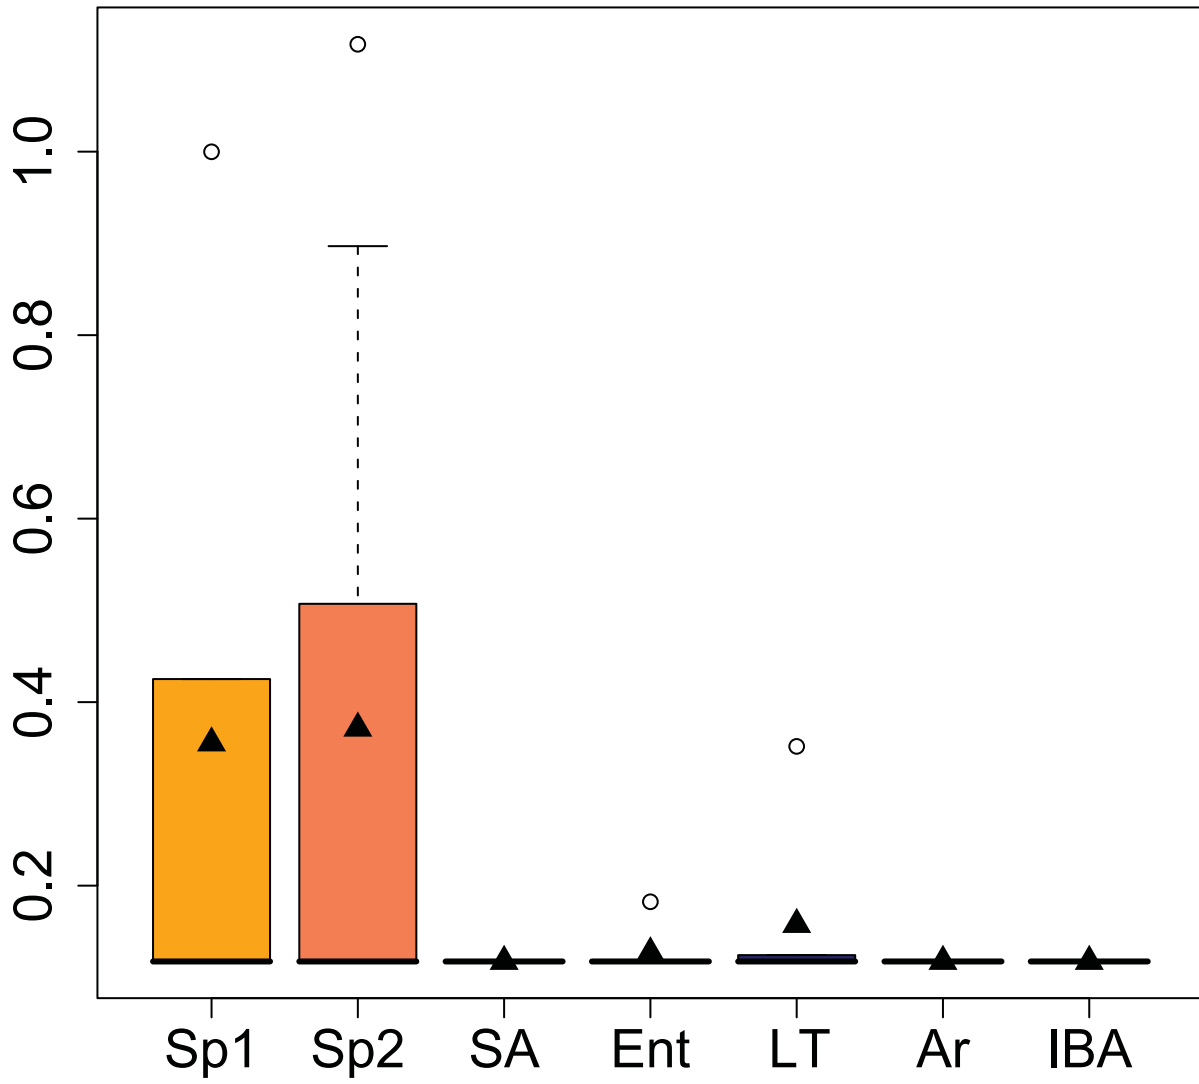



### 3-methoxytyrosine

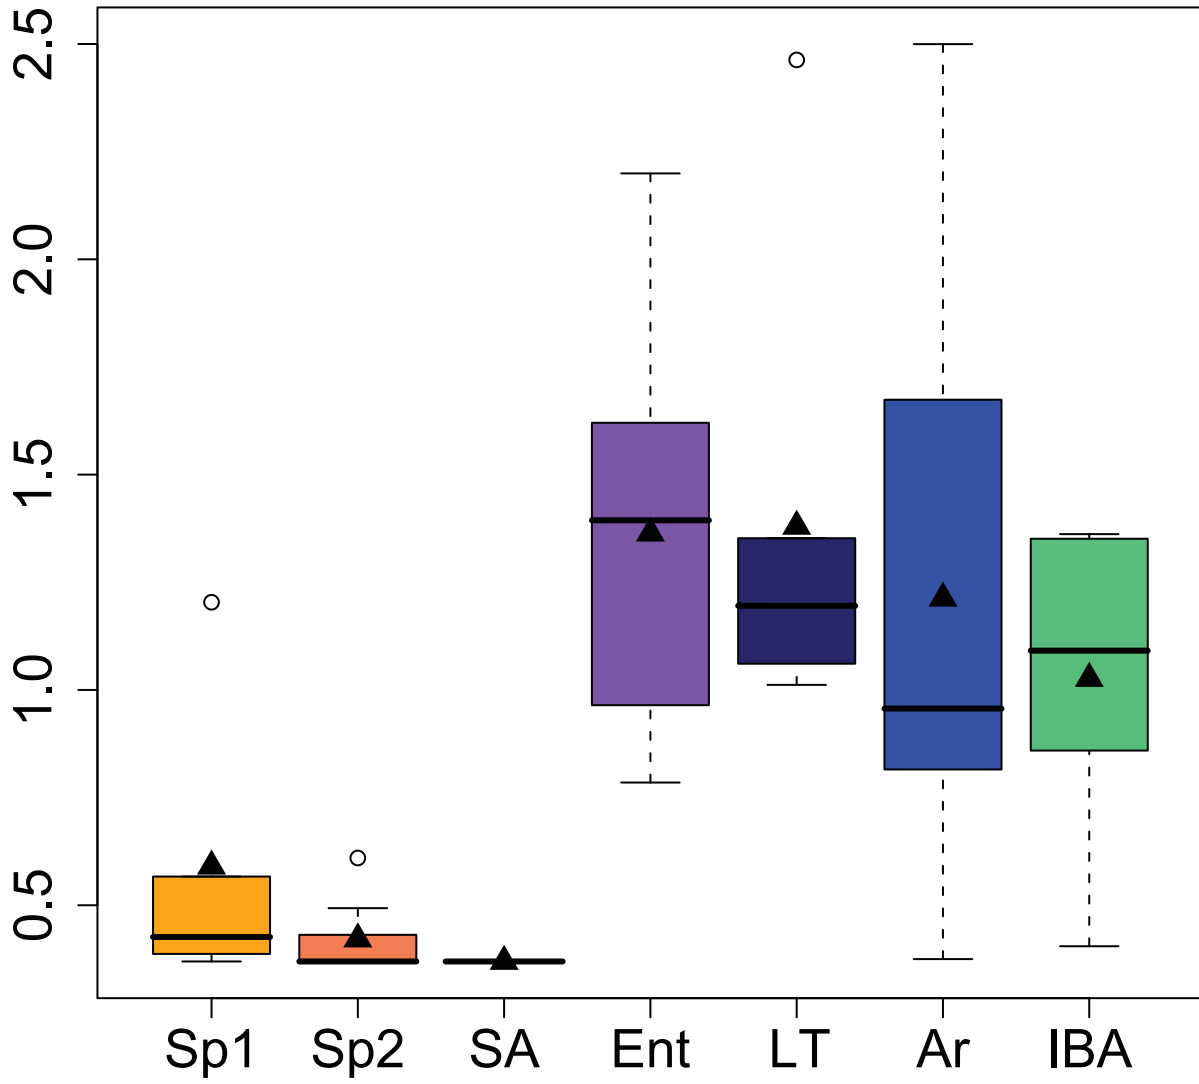

# N-acetylphenylalanine

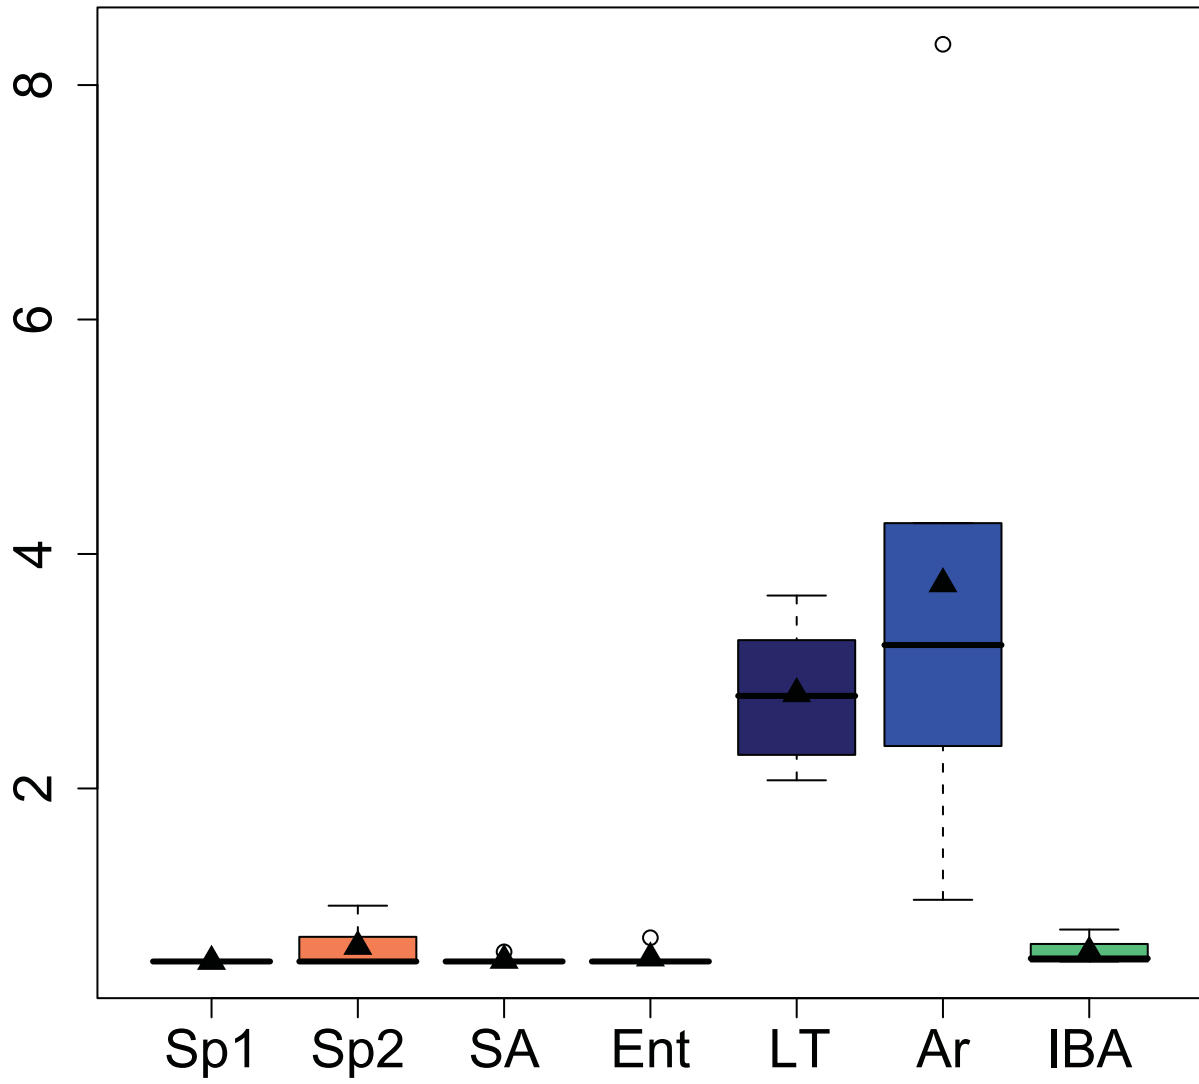

p-cresol sulfate\*

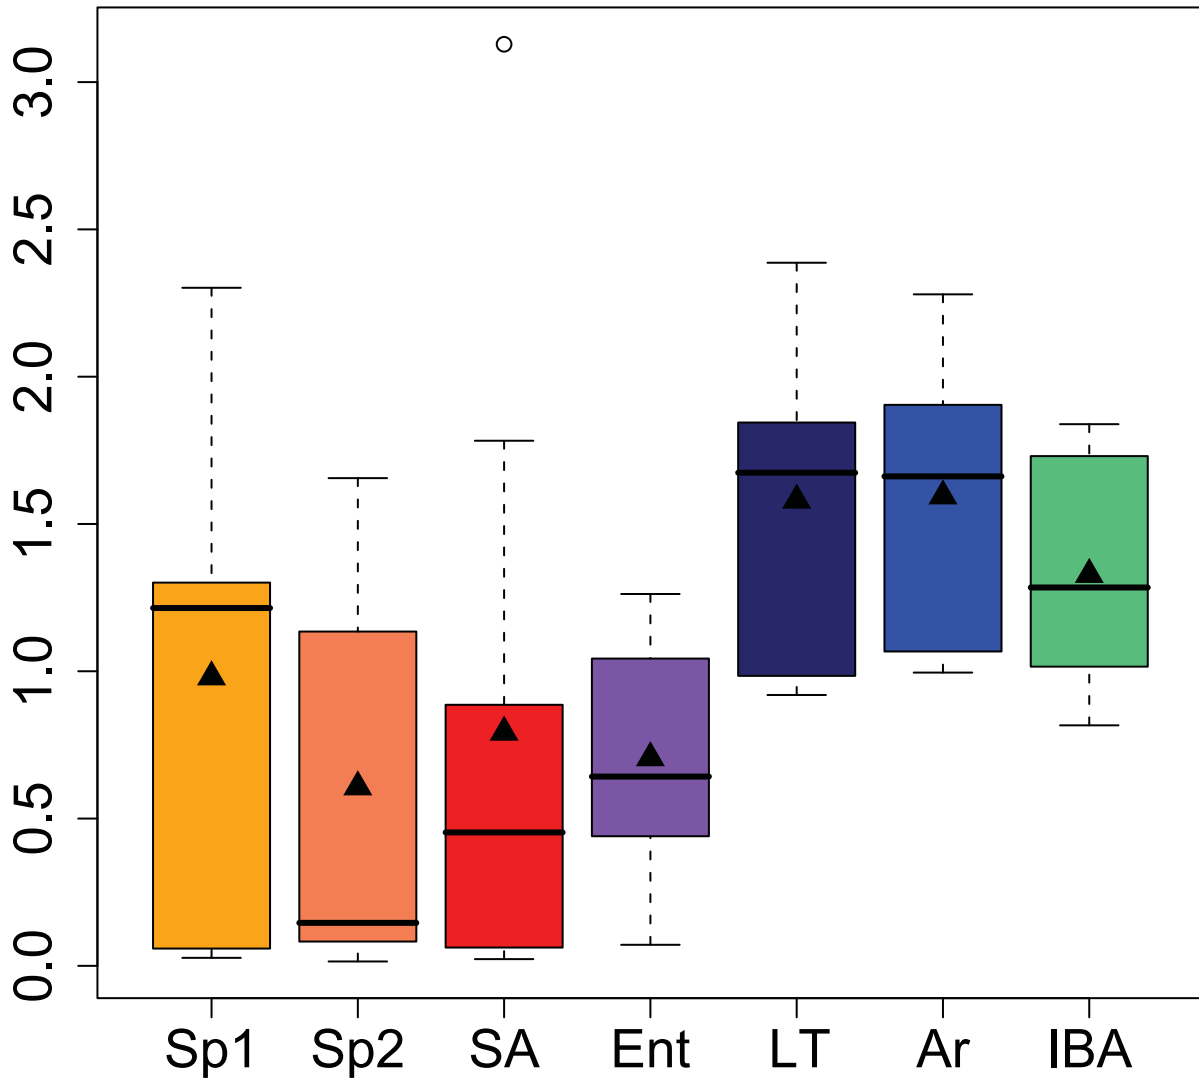

# phenylacetate

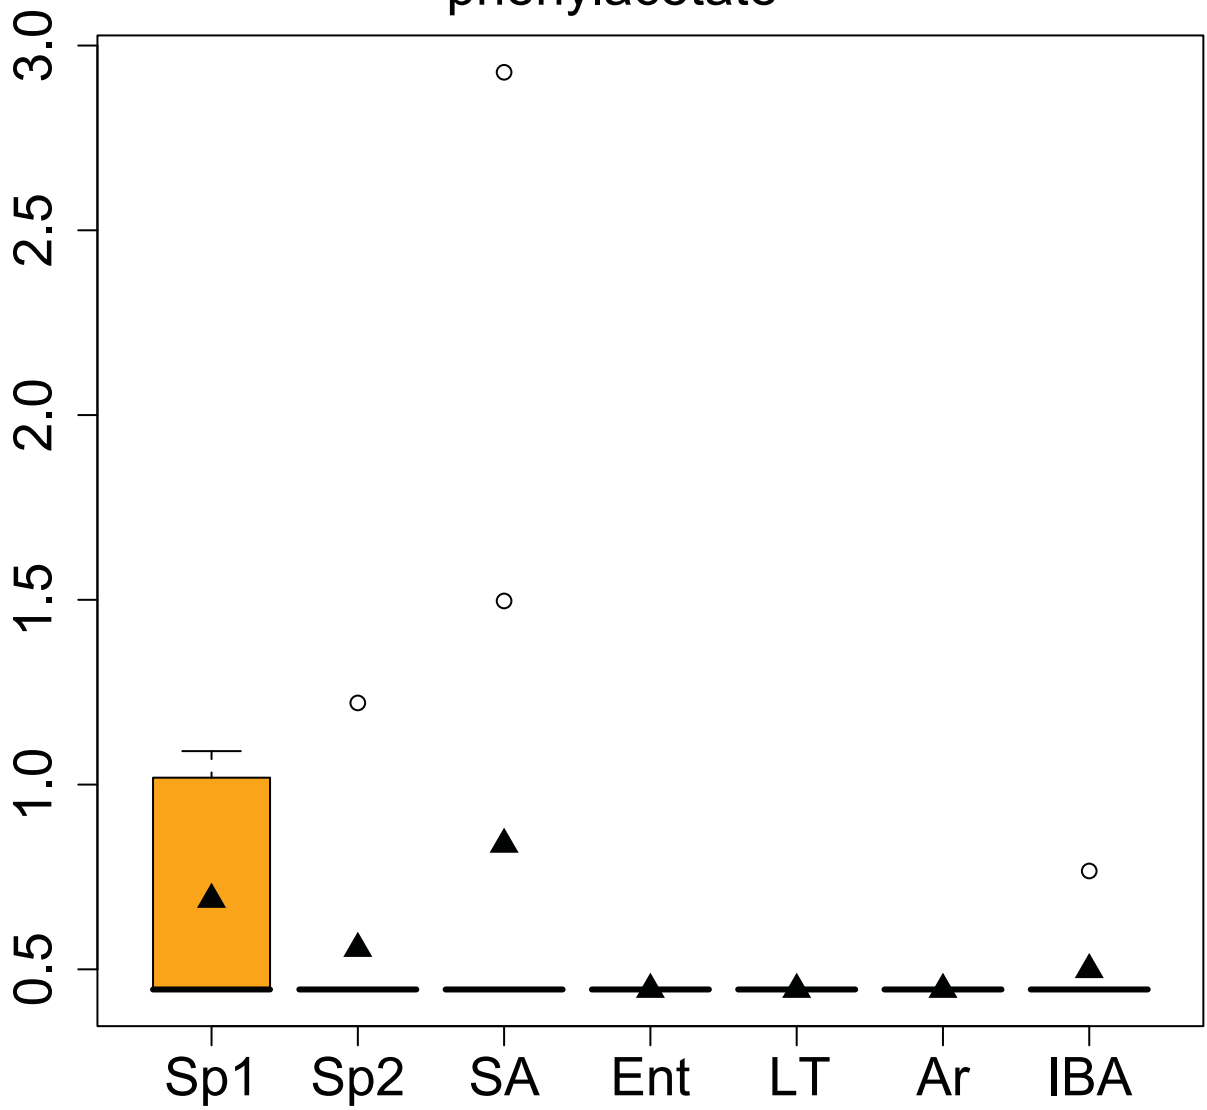

# phenylacetylglutamine

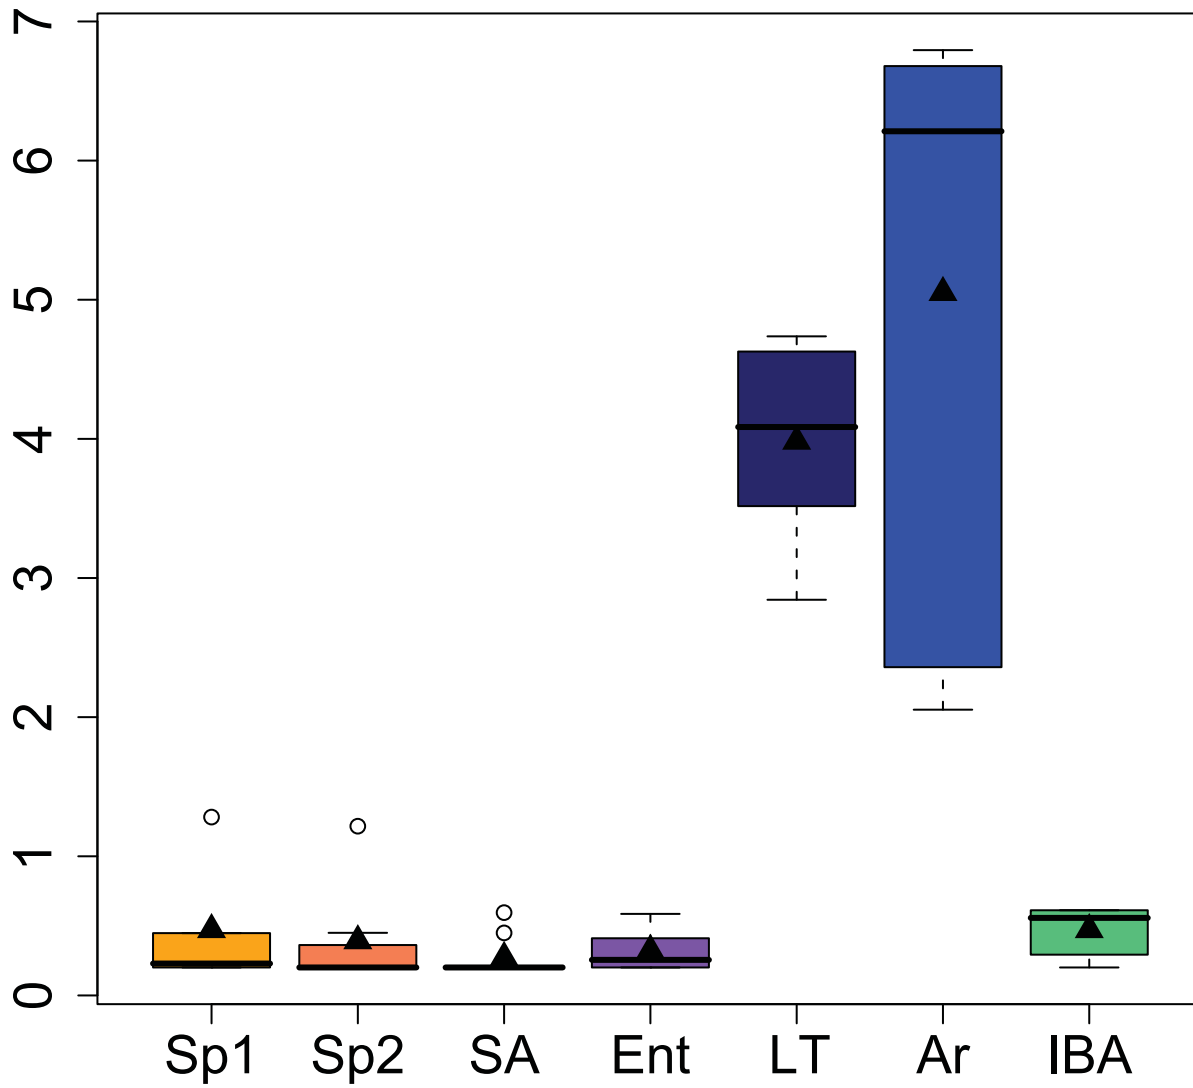

# phenylacetylglucine

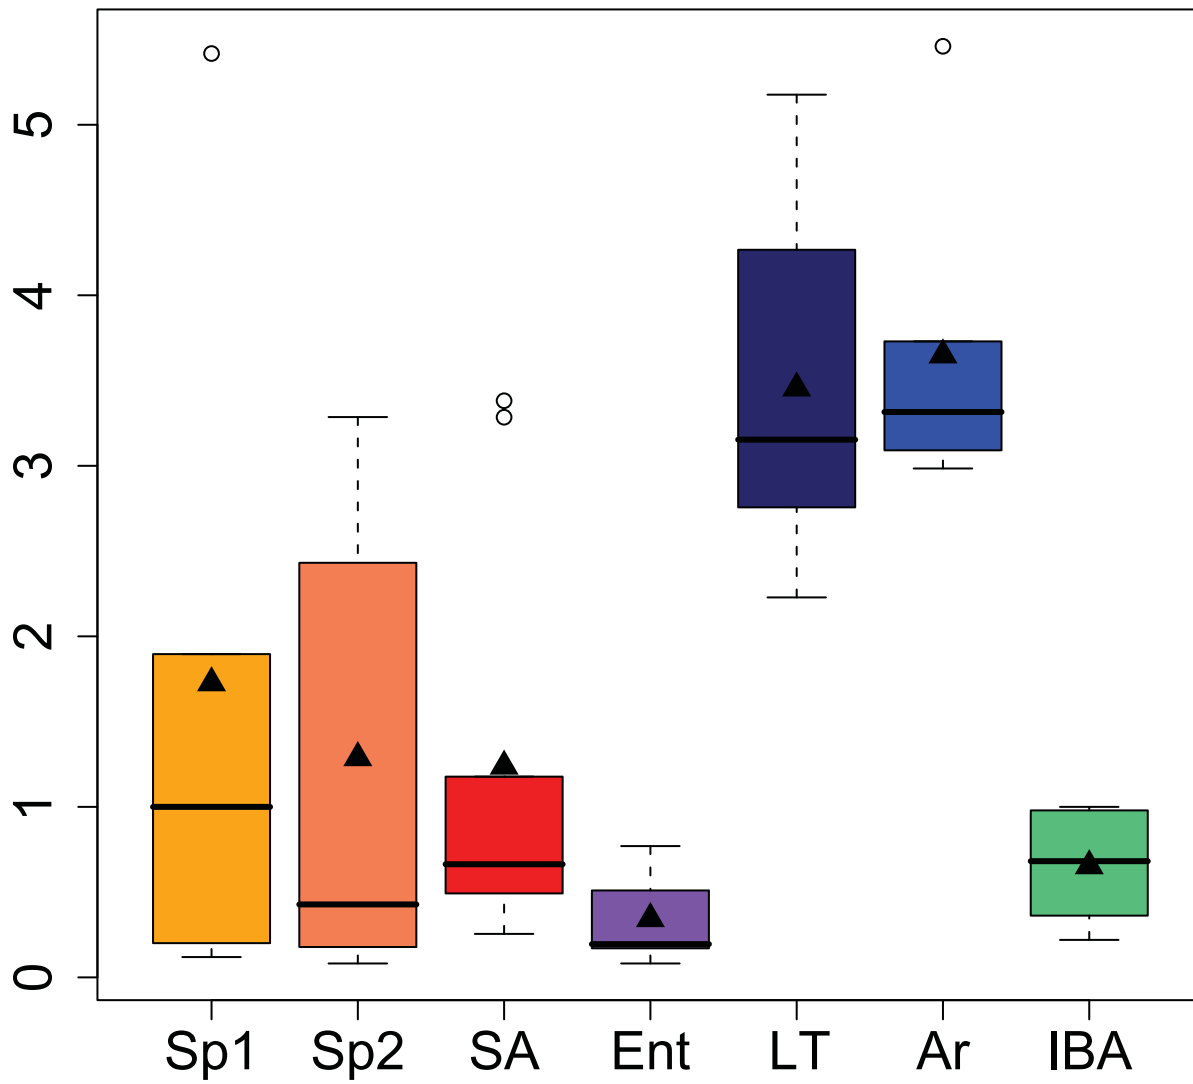

# phenylalanine

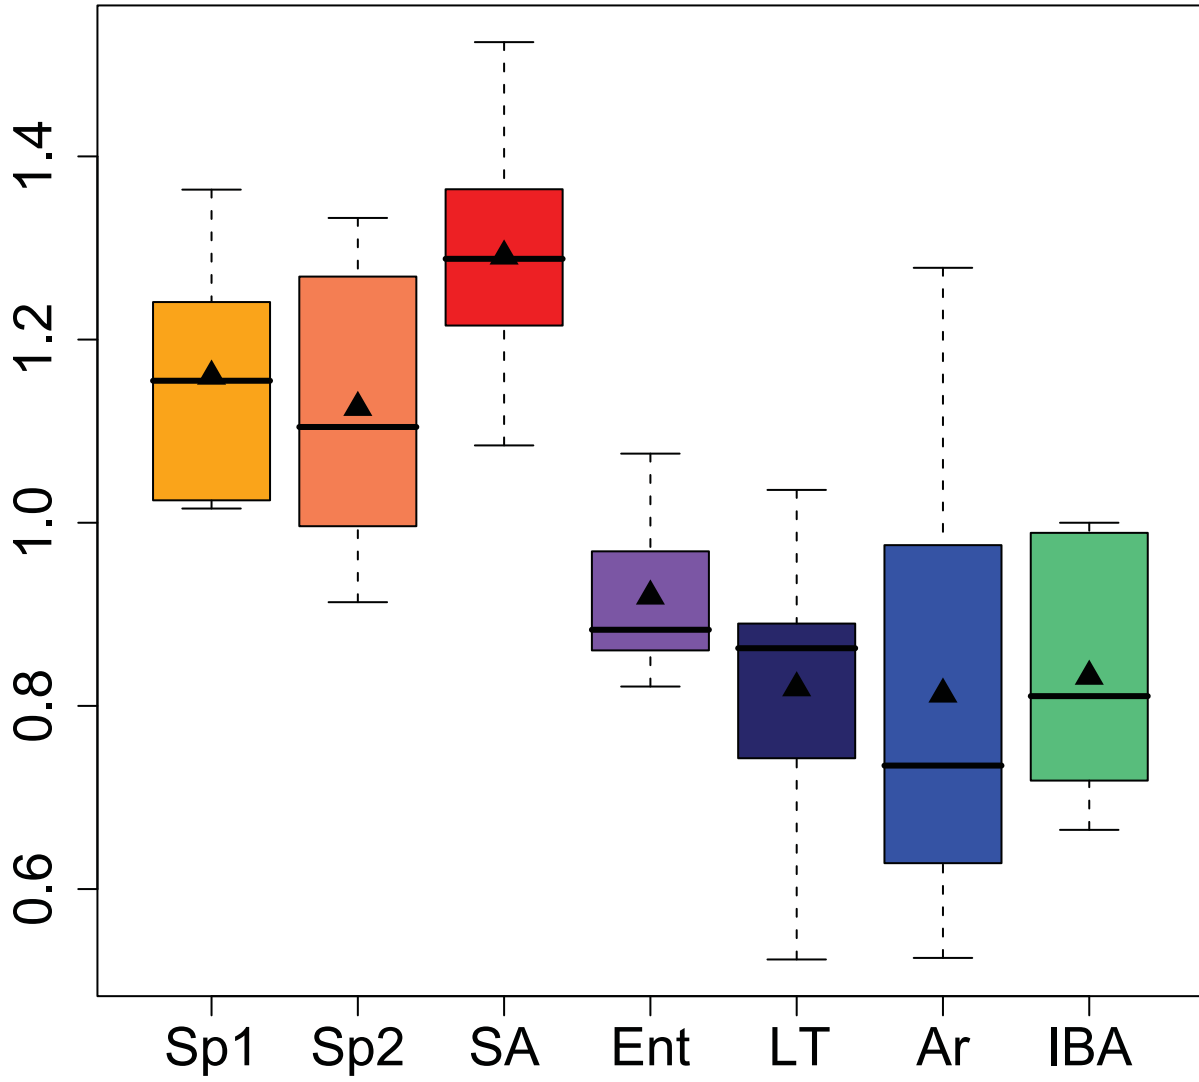

# tyrosine

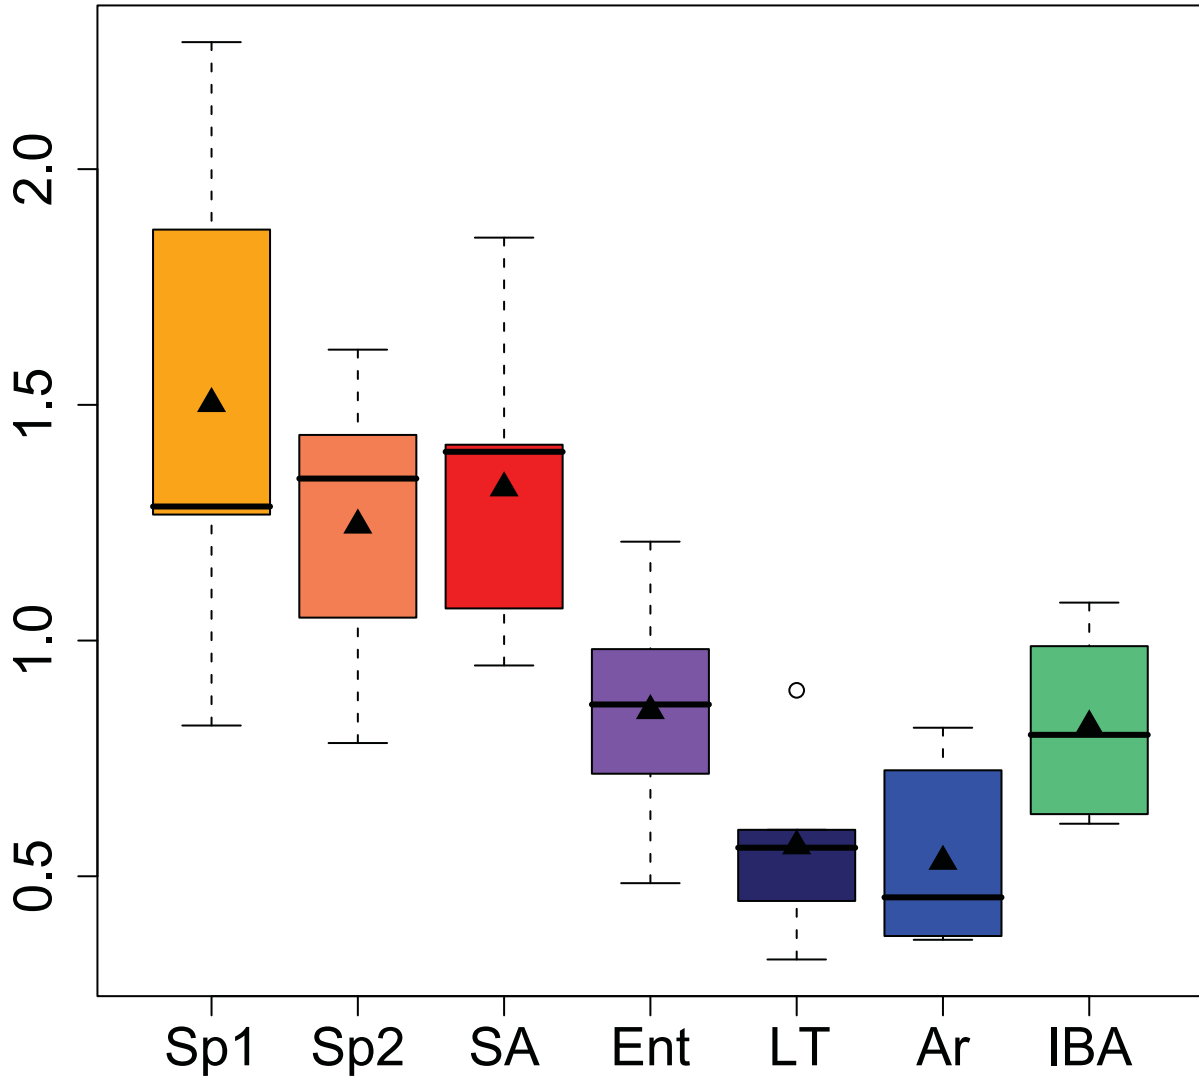



### 5-methylthioadenosine (MTA)

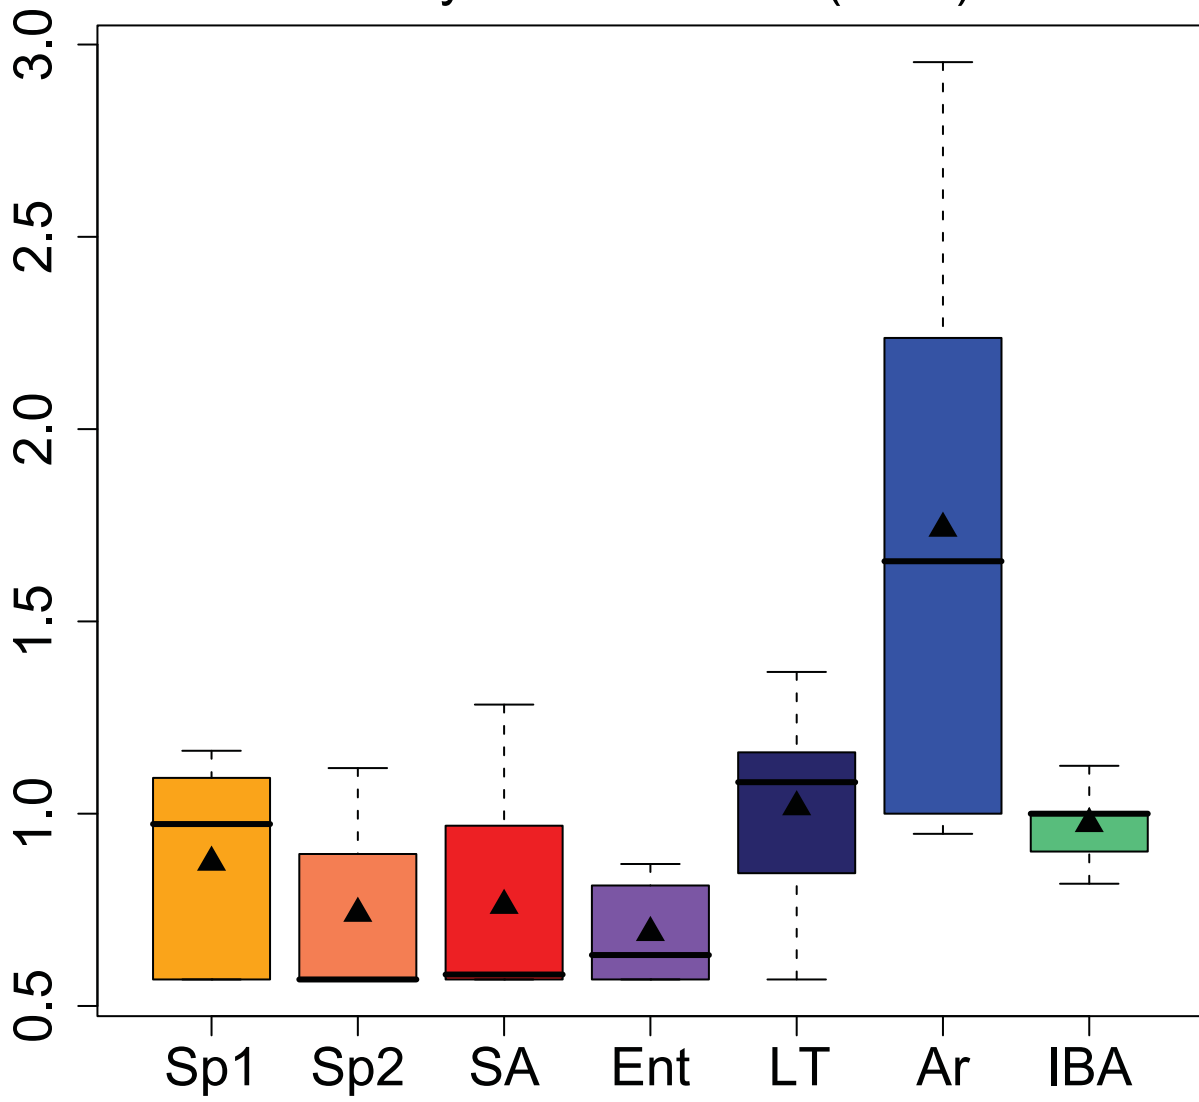

### 3-indoxyl-sulfate

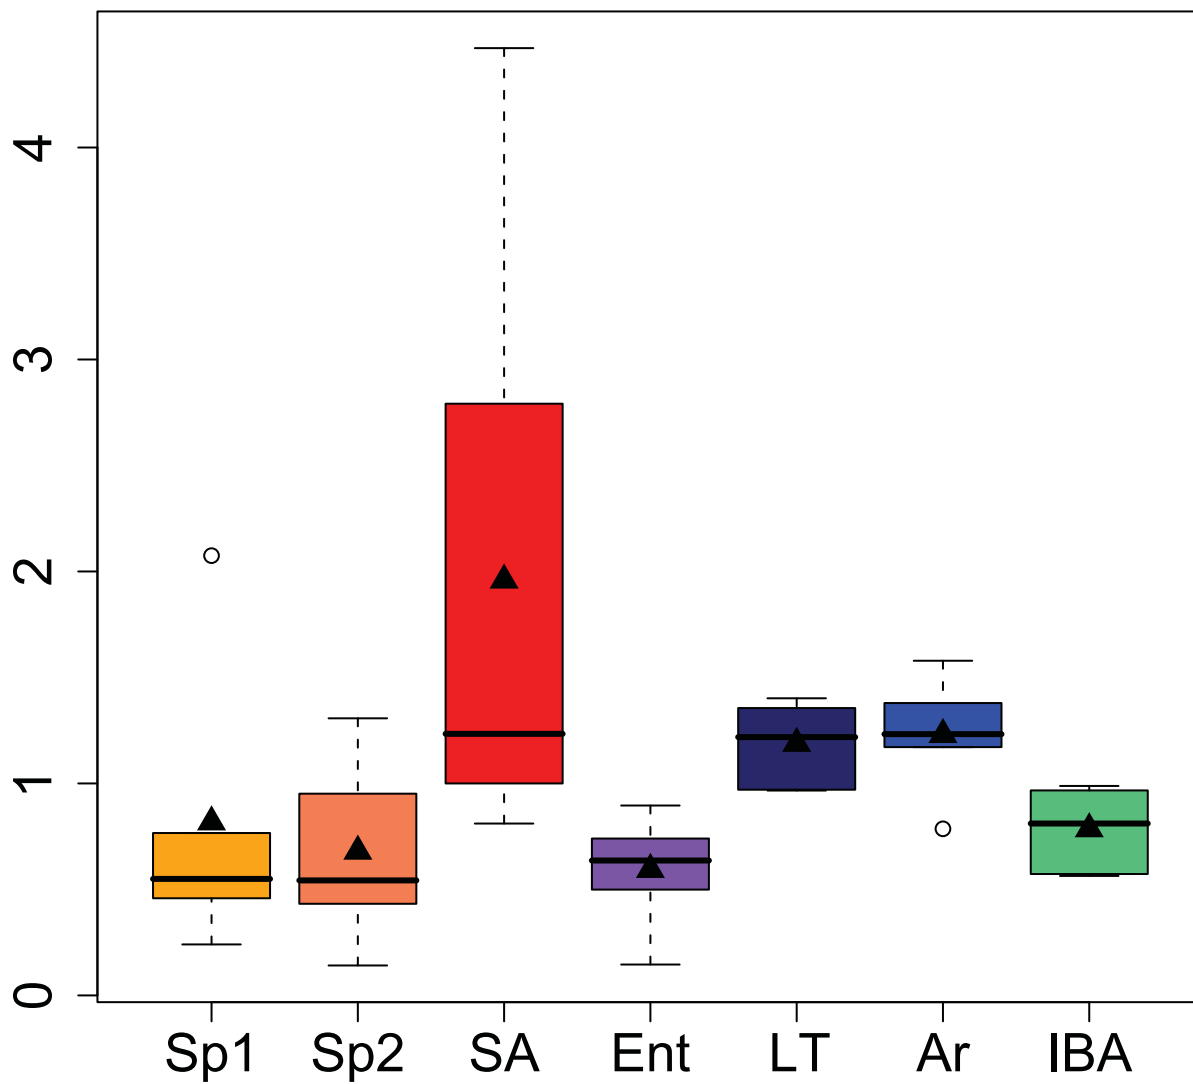

# anthranilate

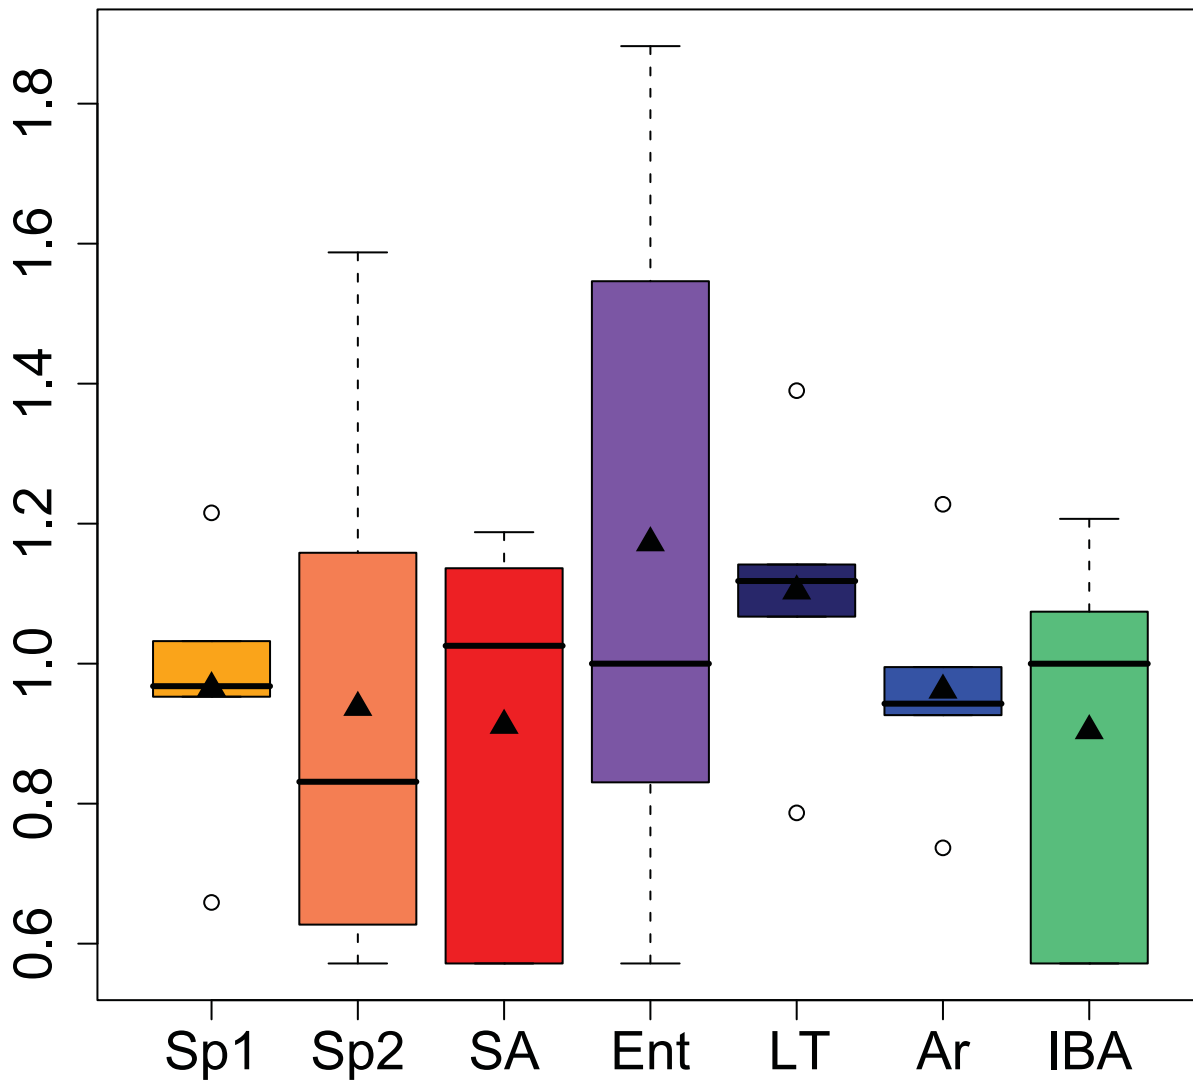

# indoleacetate

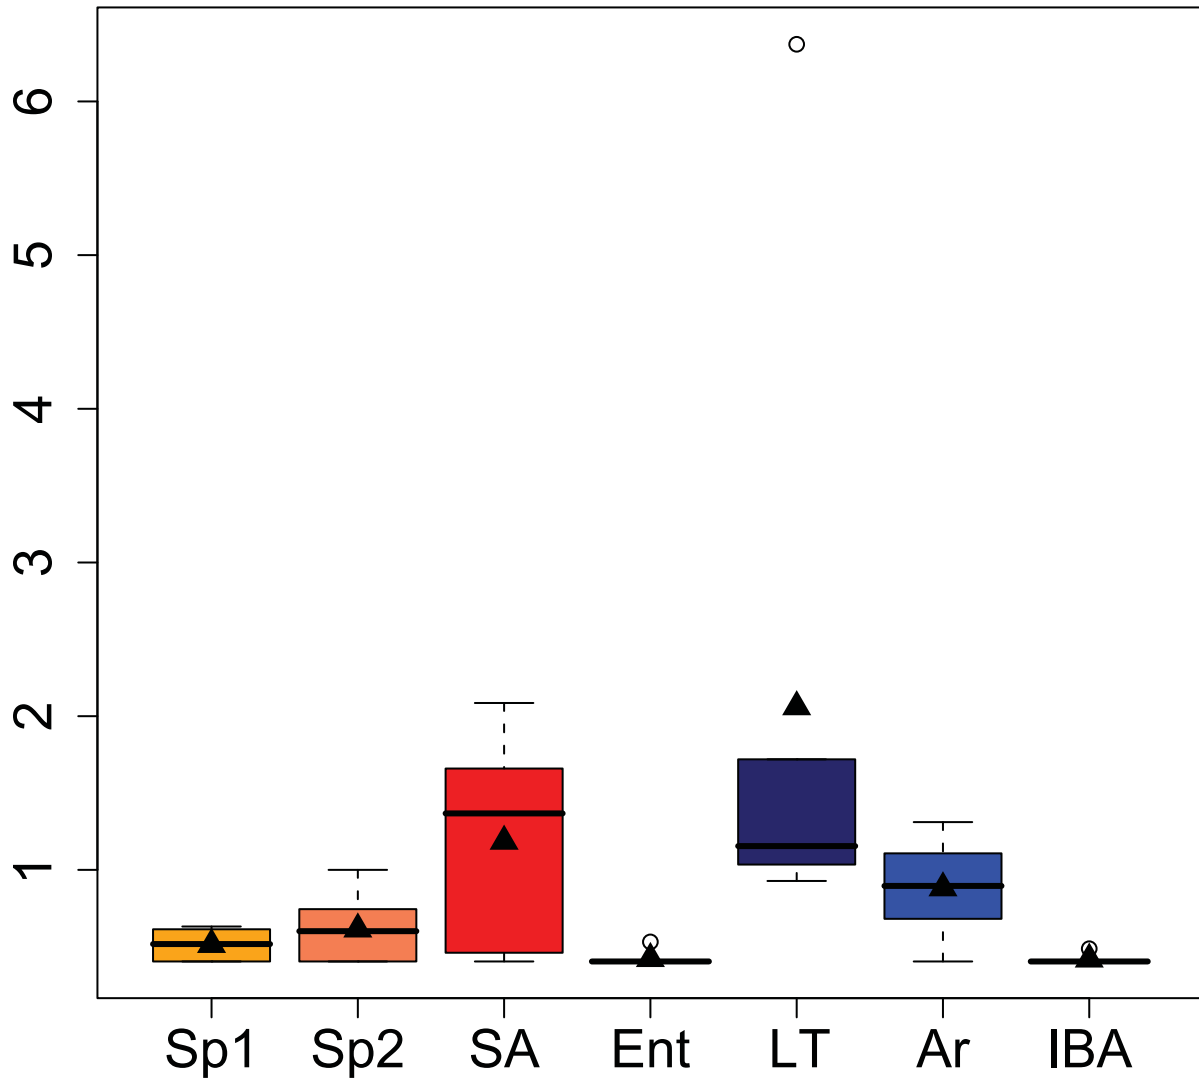

# indolepropionate

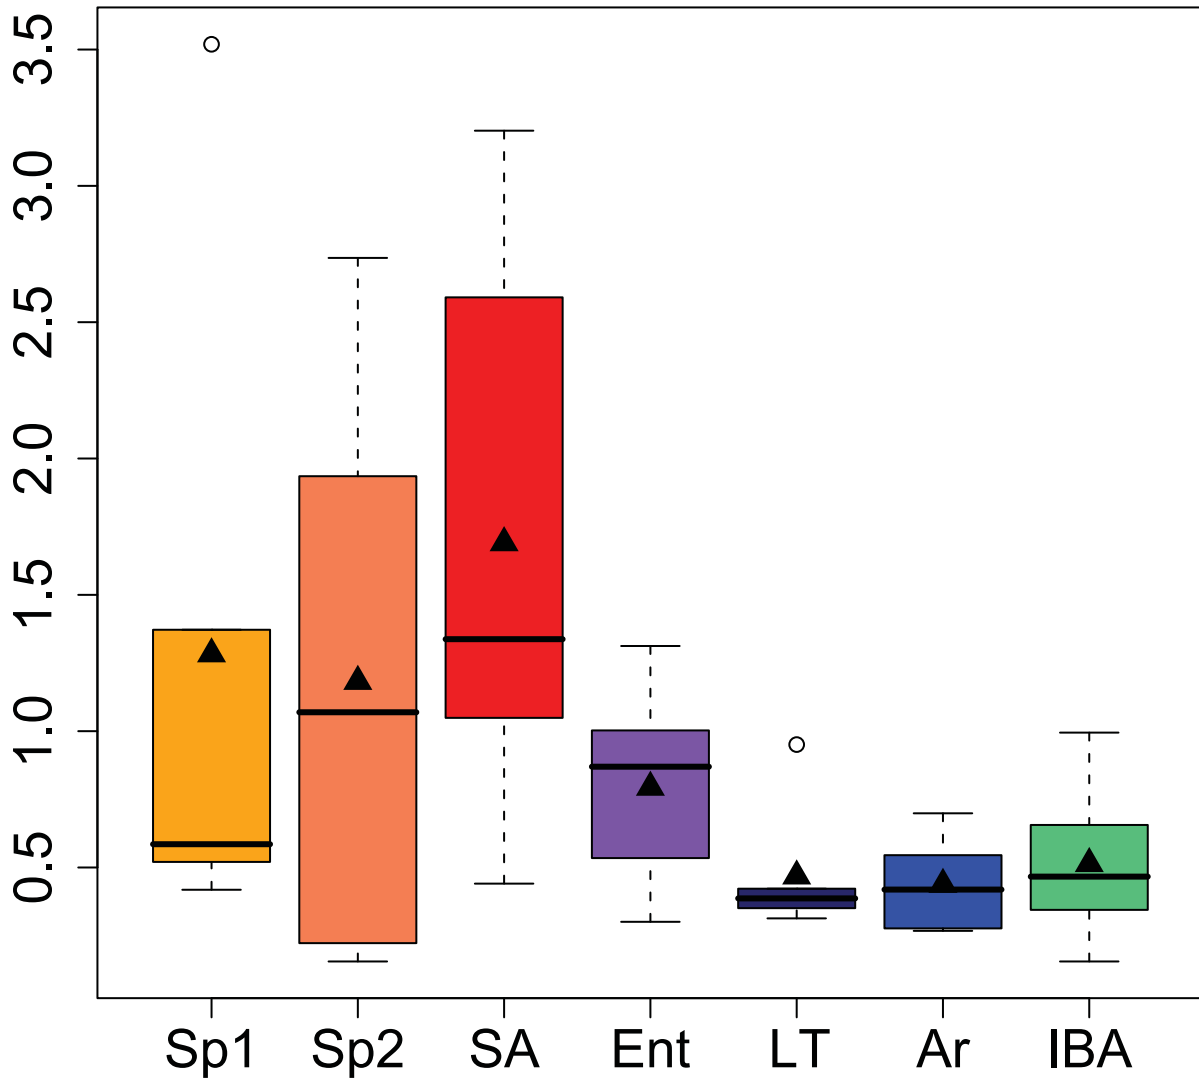

# kynurenine

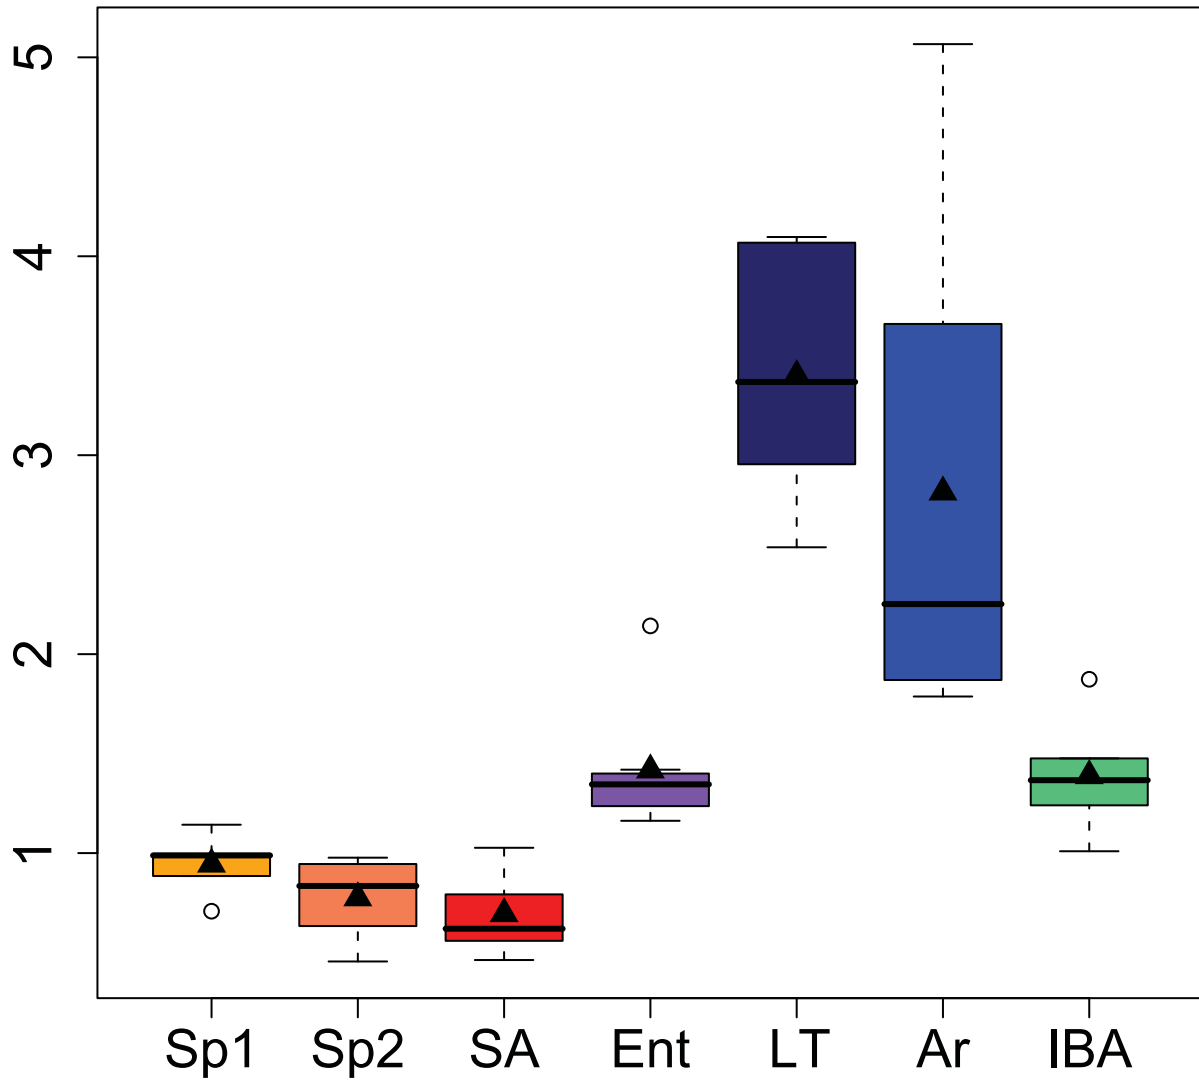

# N-acetyltryptophan

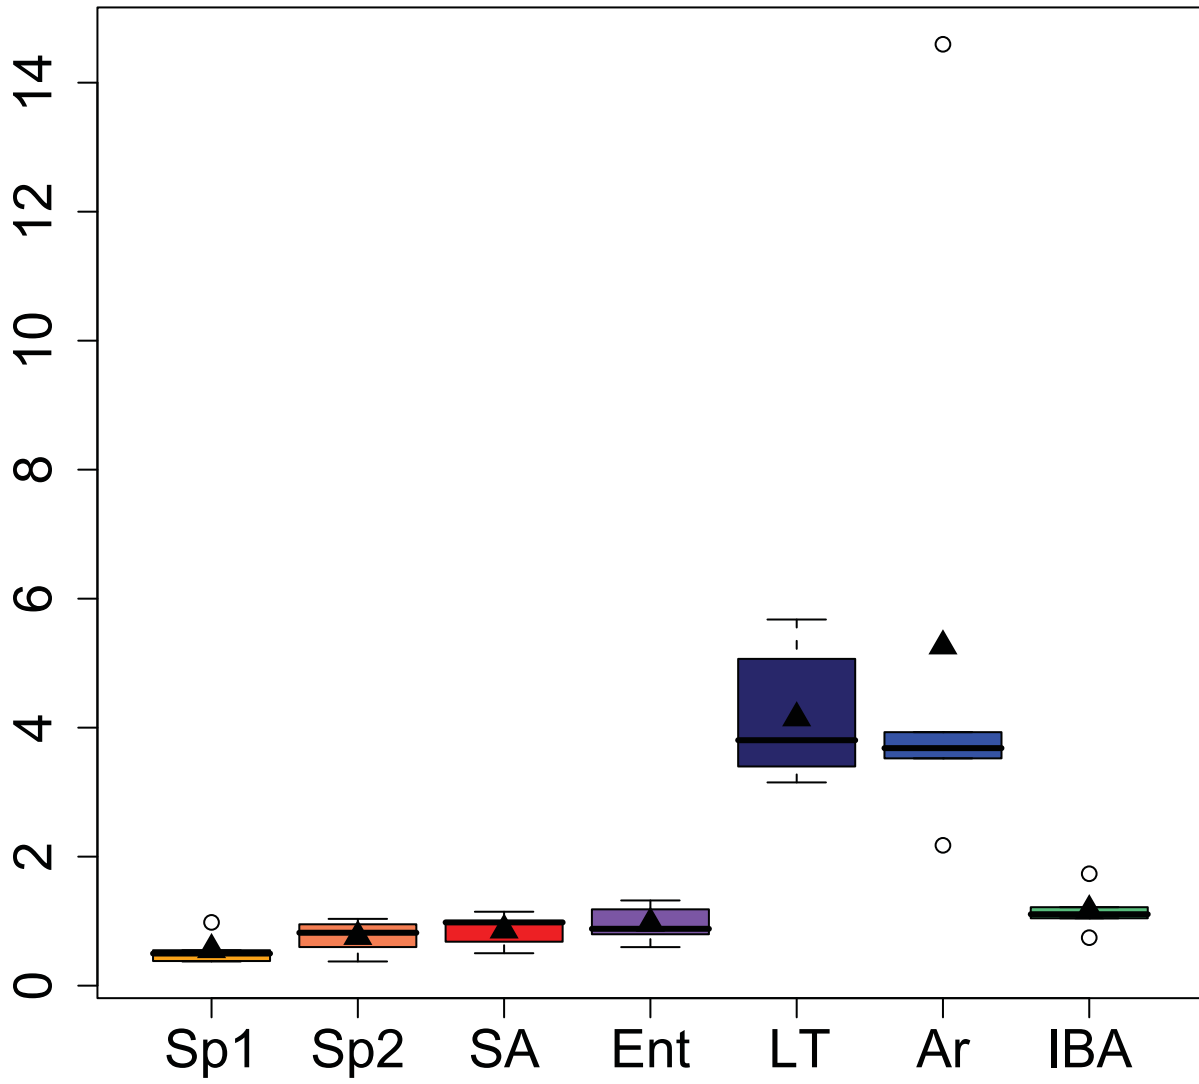

# tryptophan

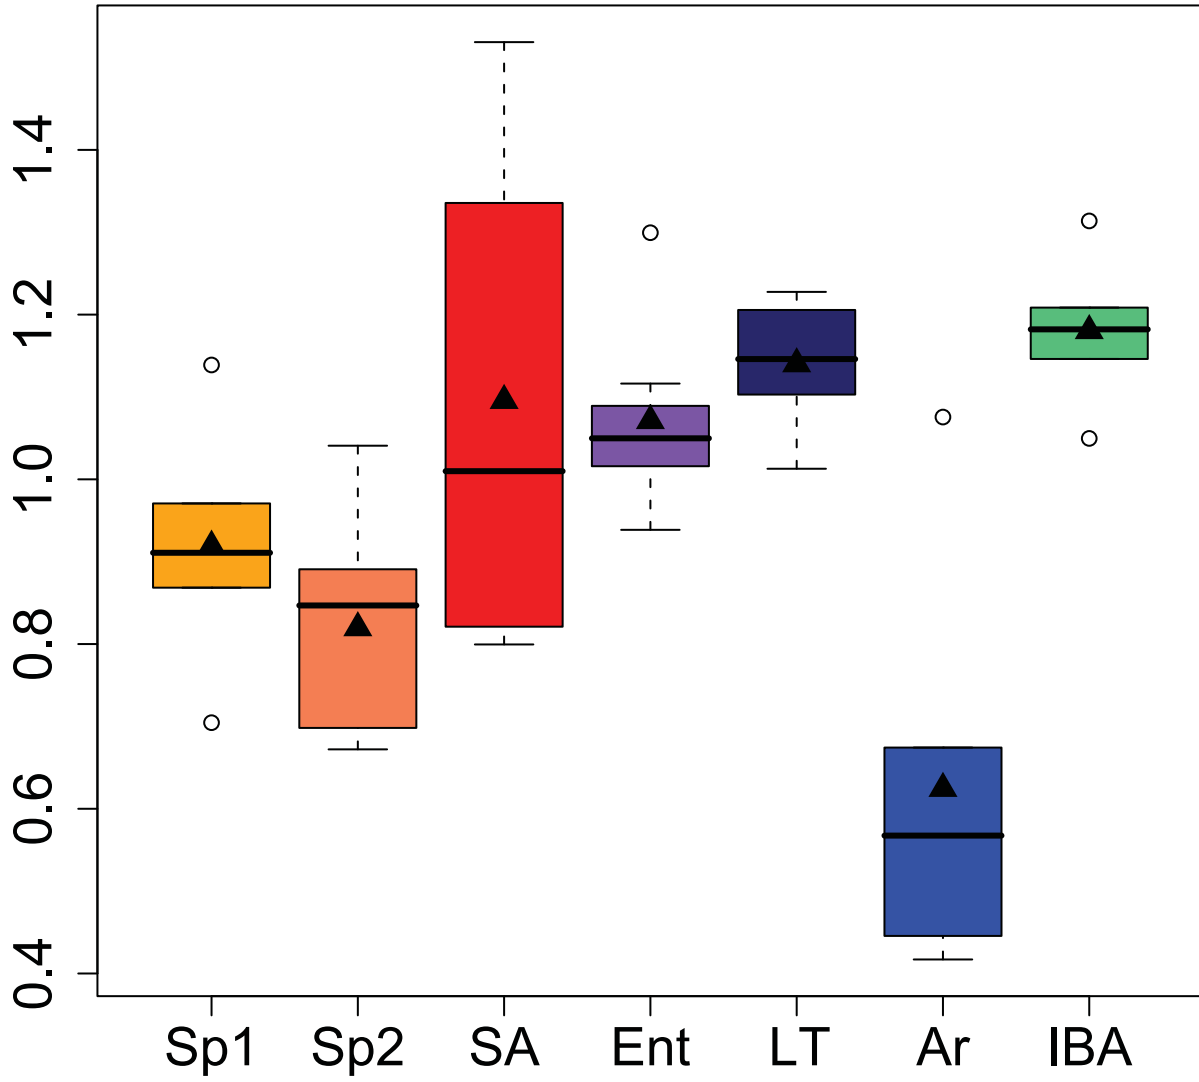



# arginine

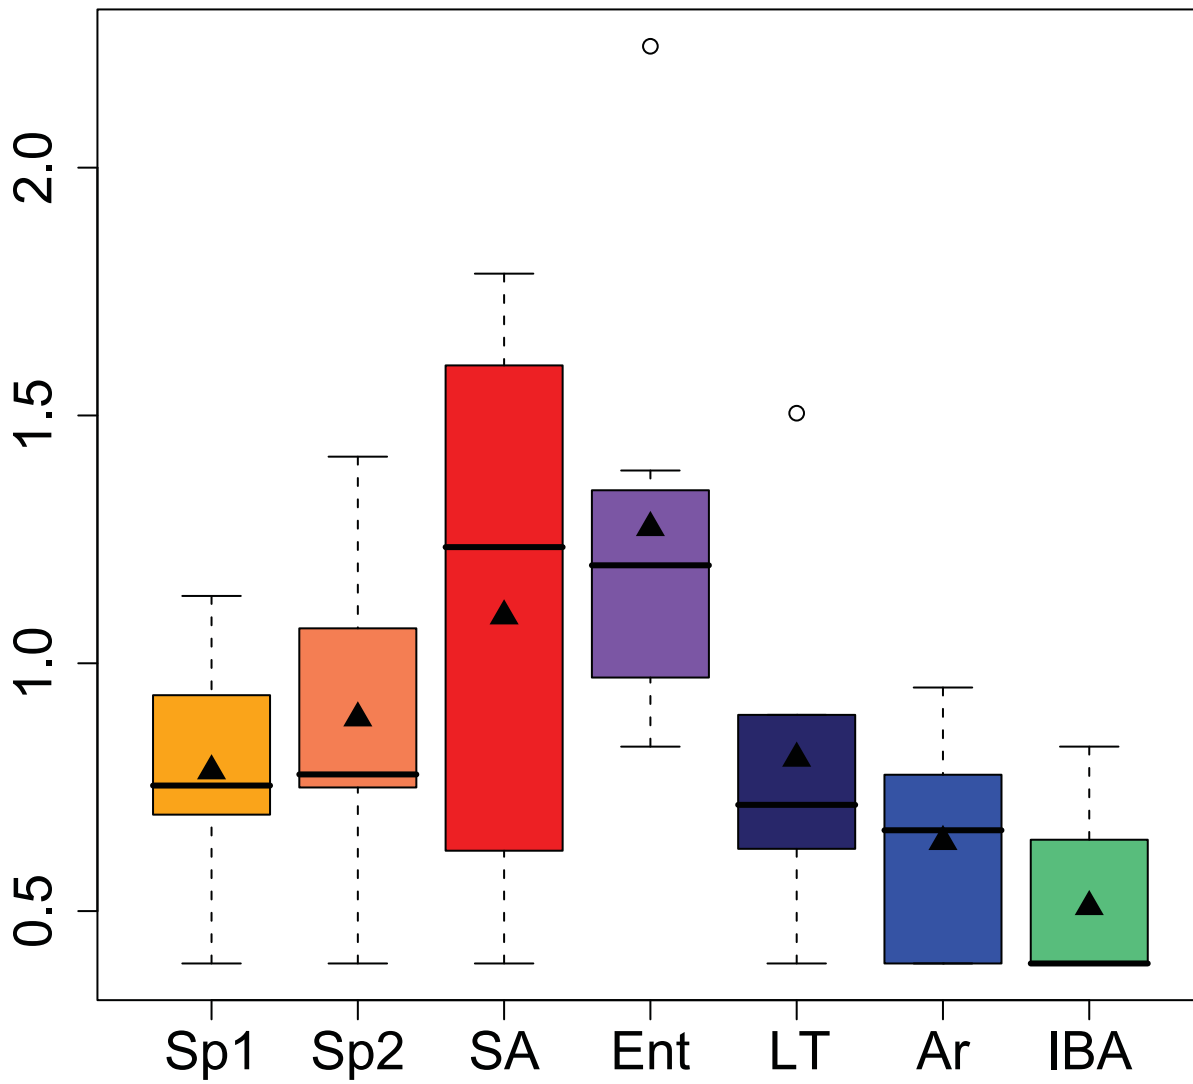

# citrulline

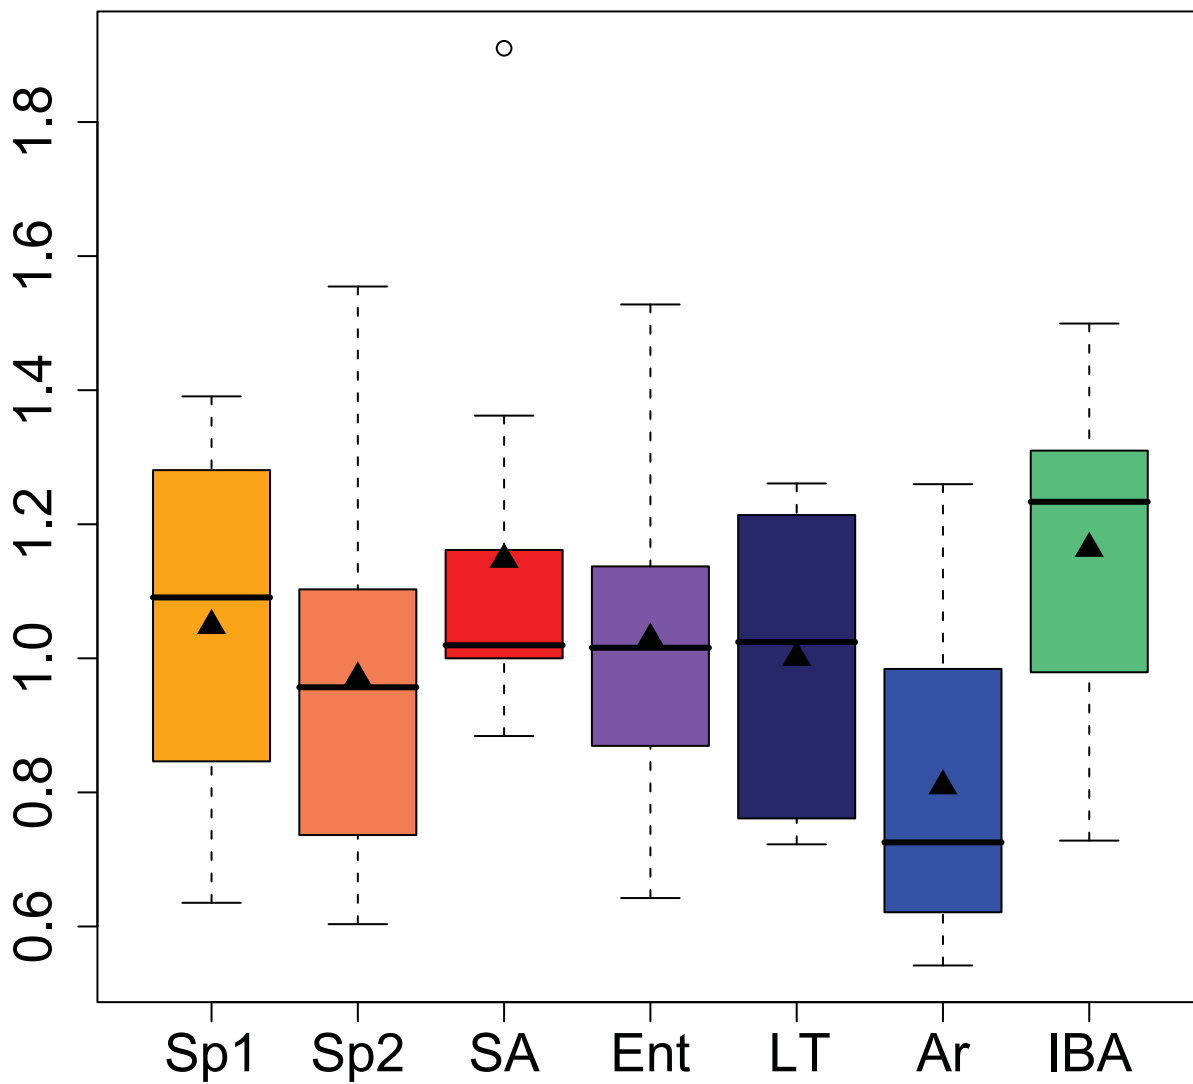

# dimethylarginine

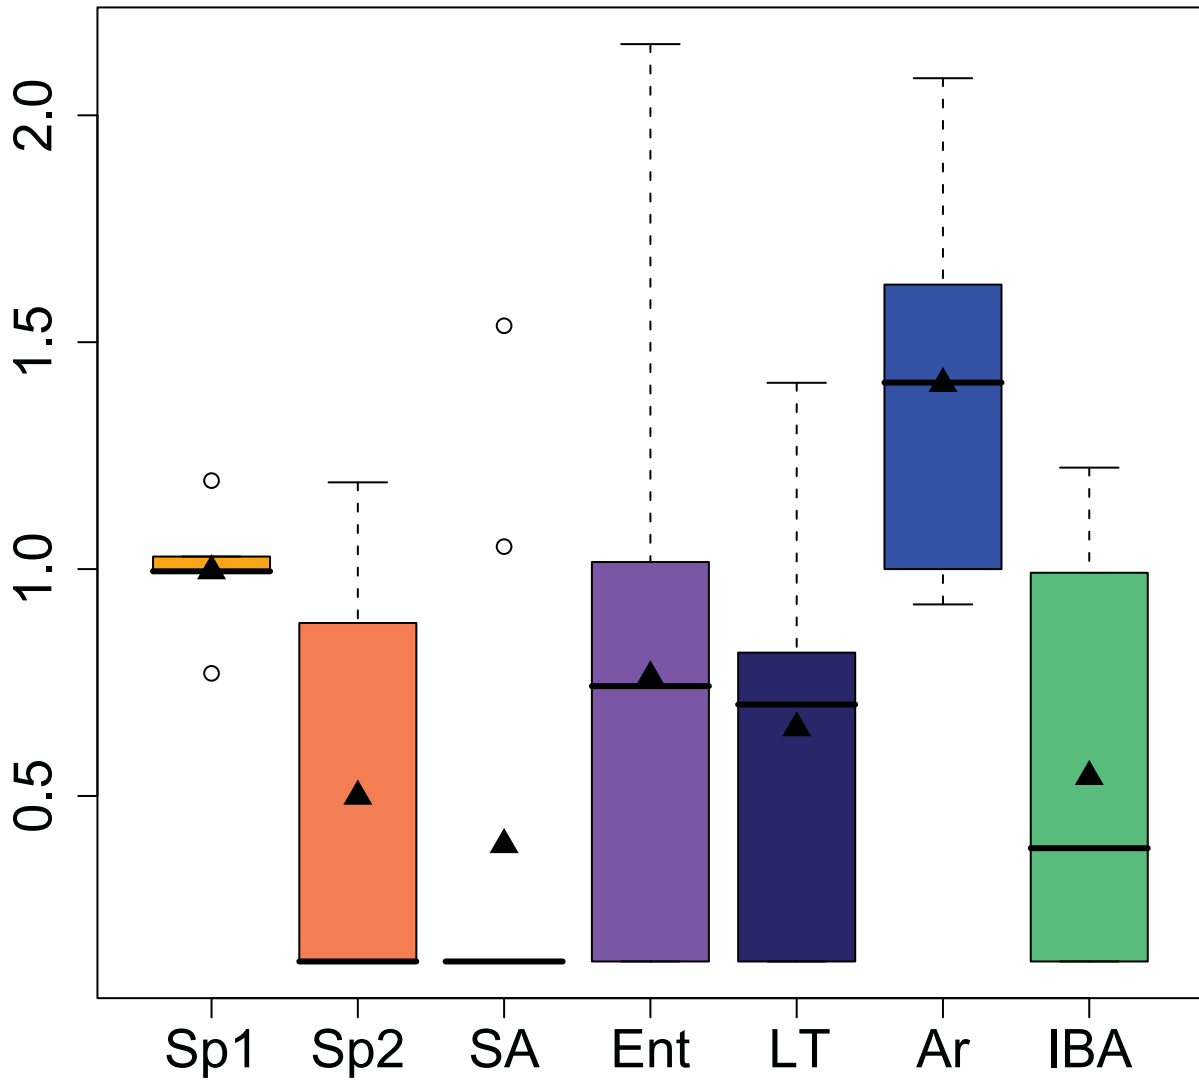

# dimethylglycine

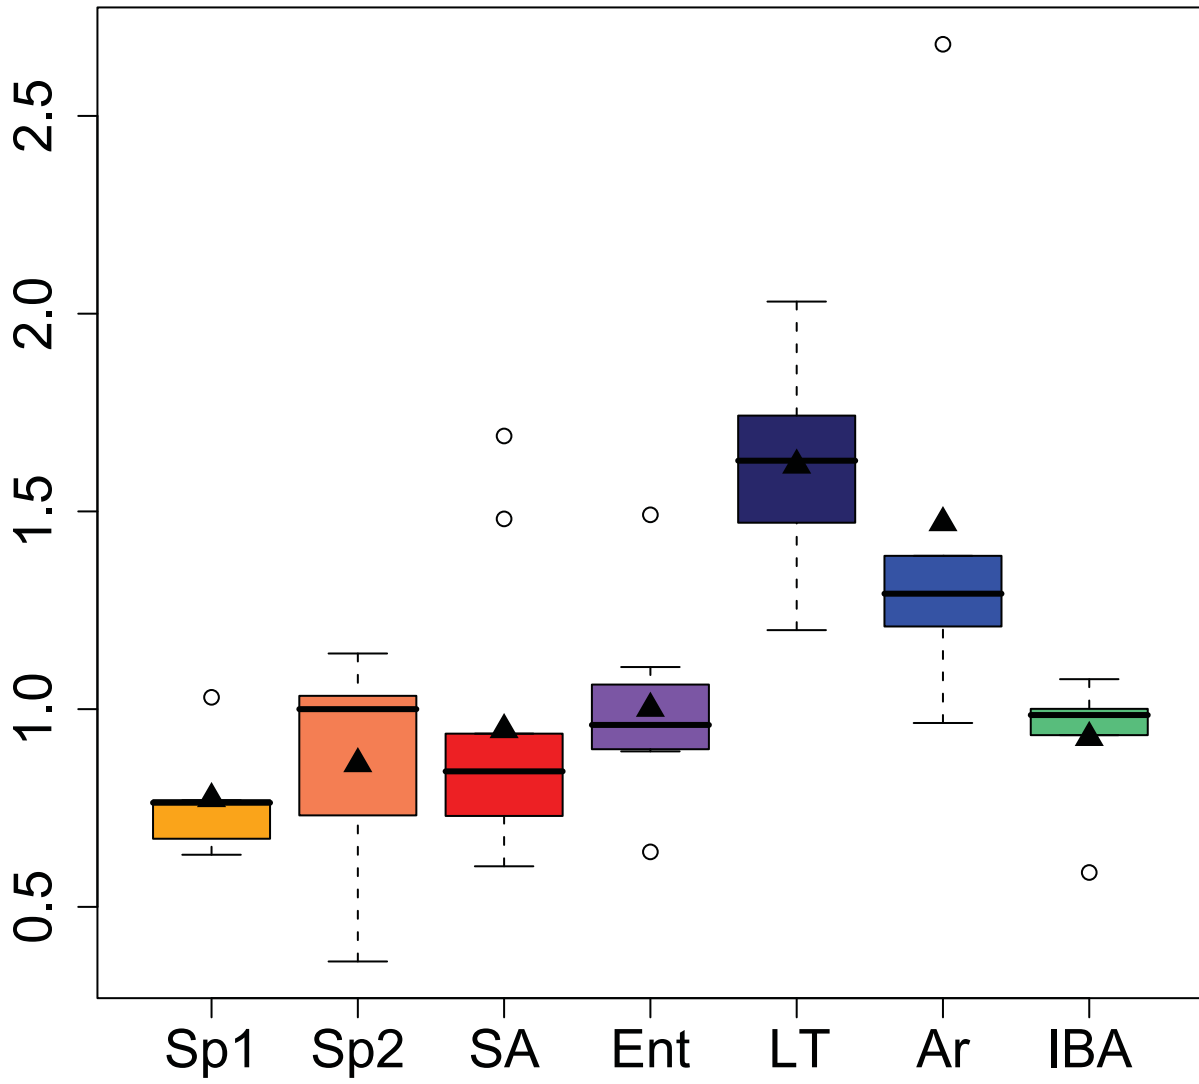

# homostachydrine-

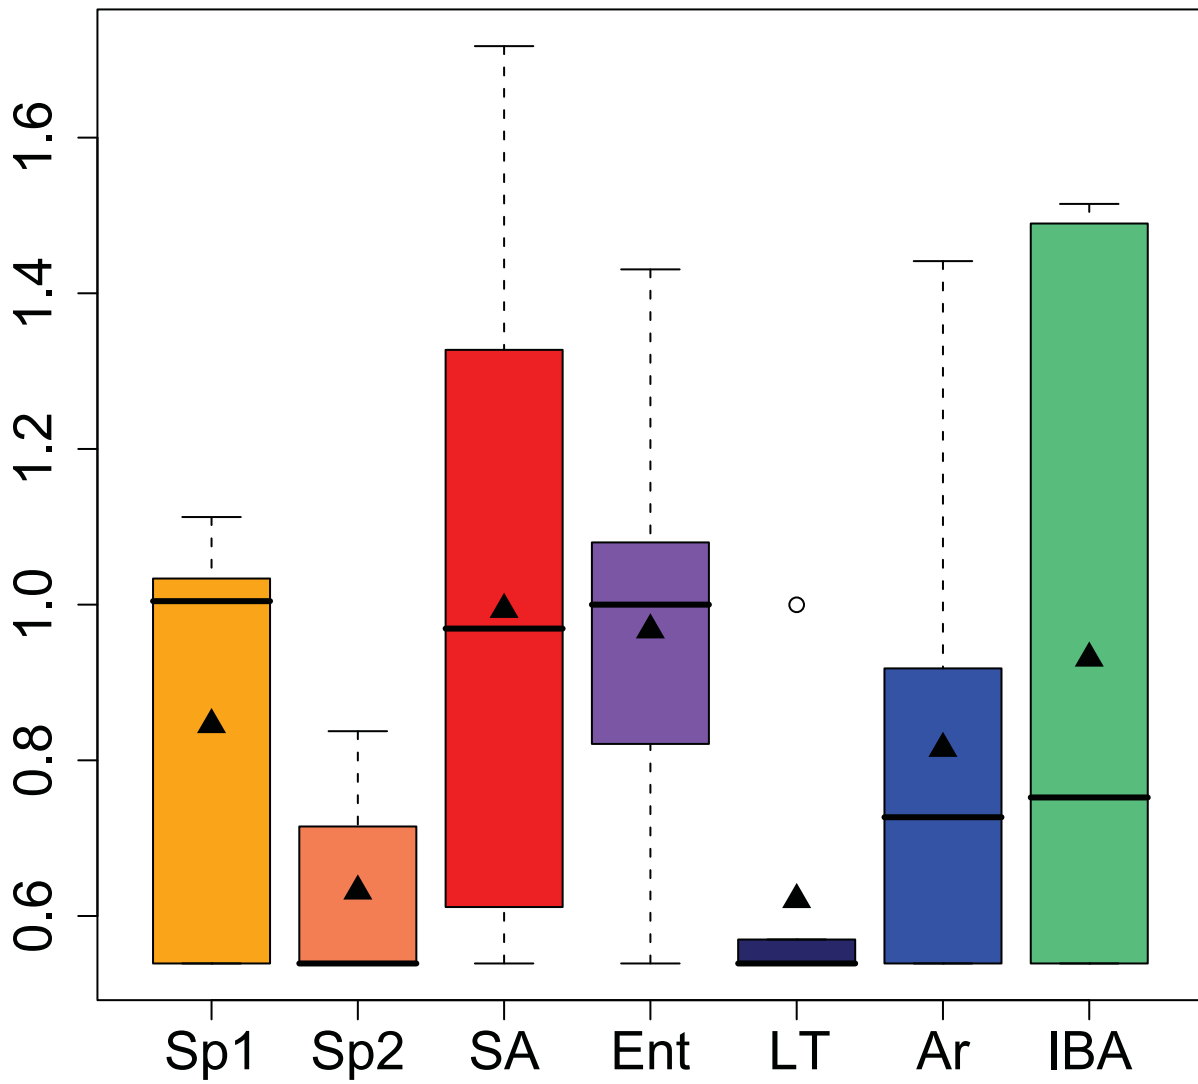

# N-acetylorntithine

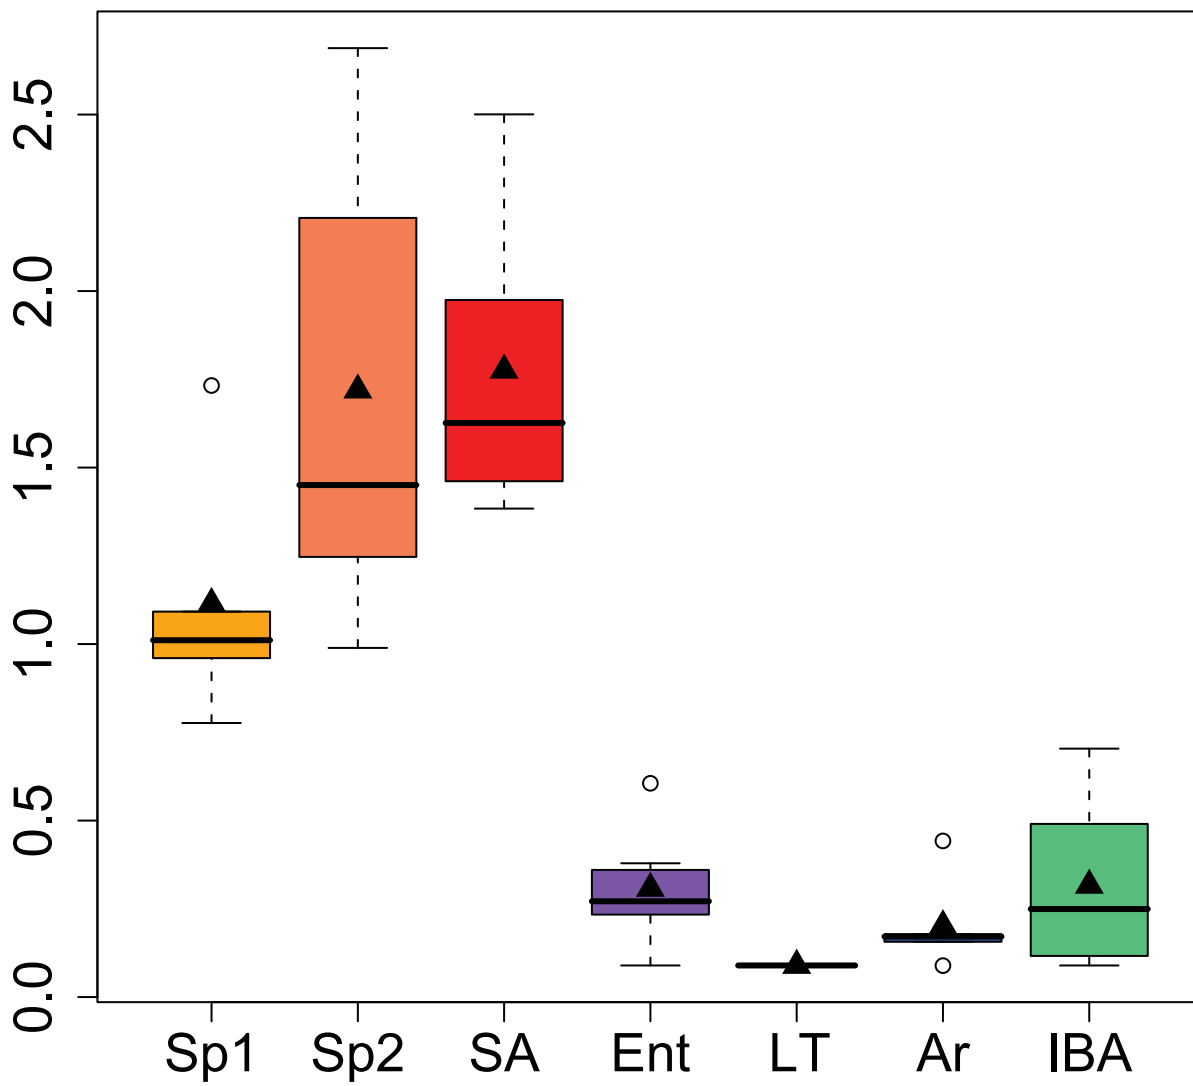

# ornithine

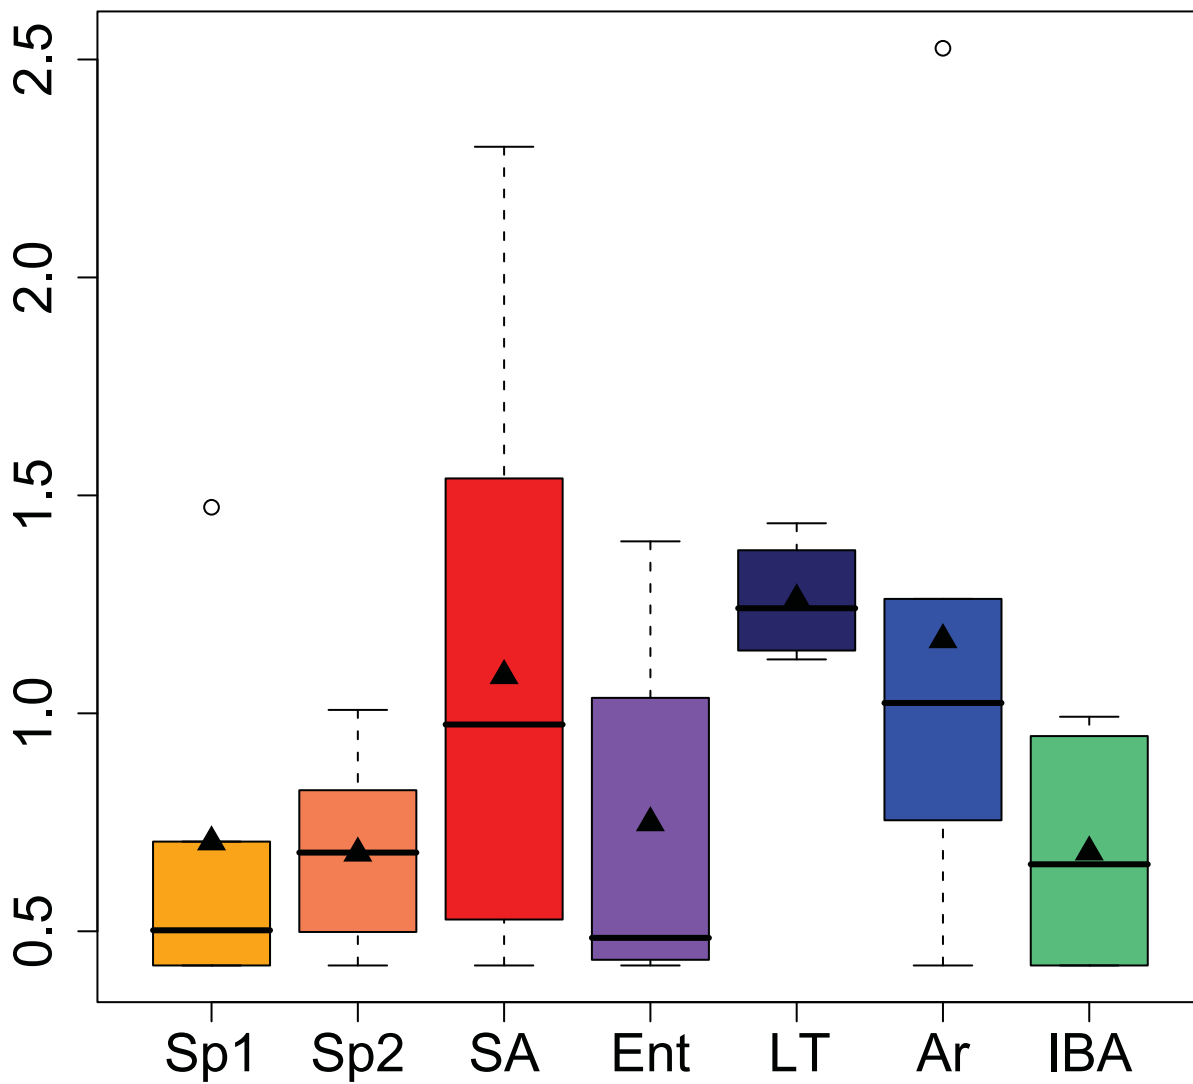

# proline

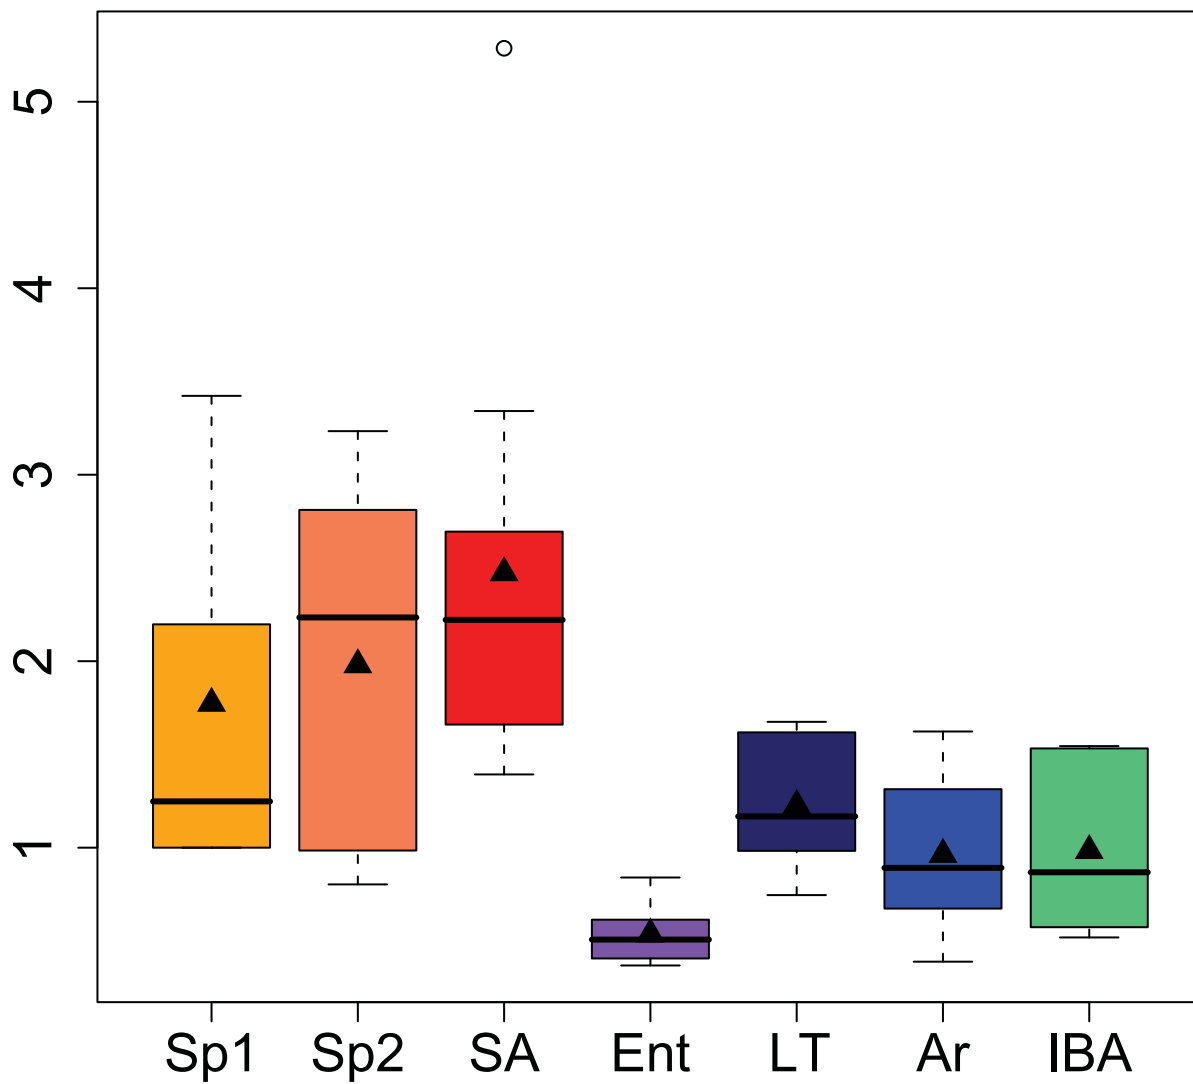



# stachydrine

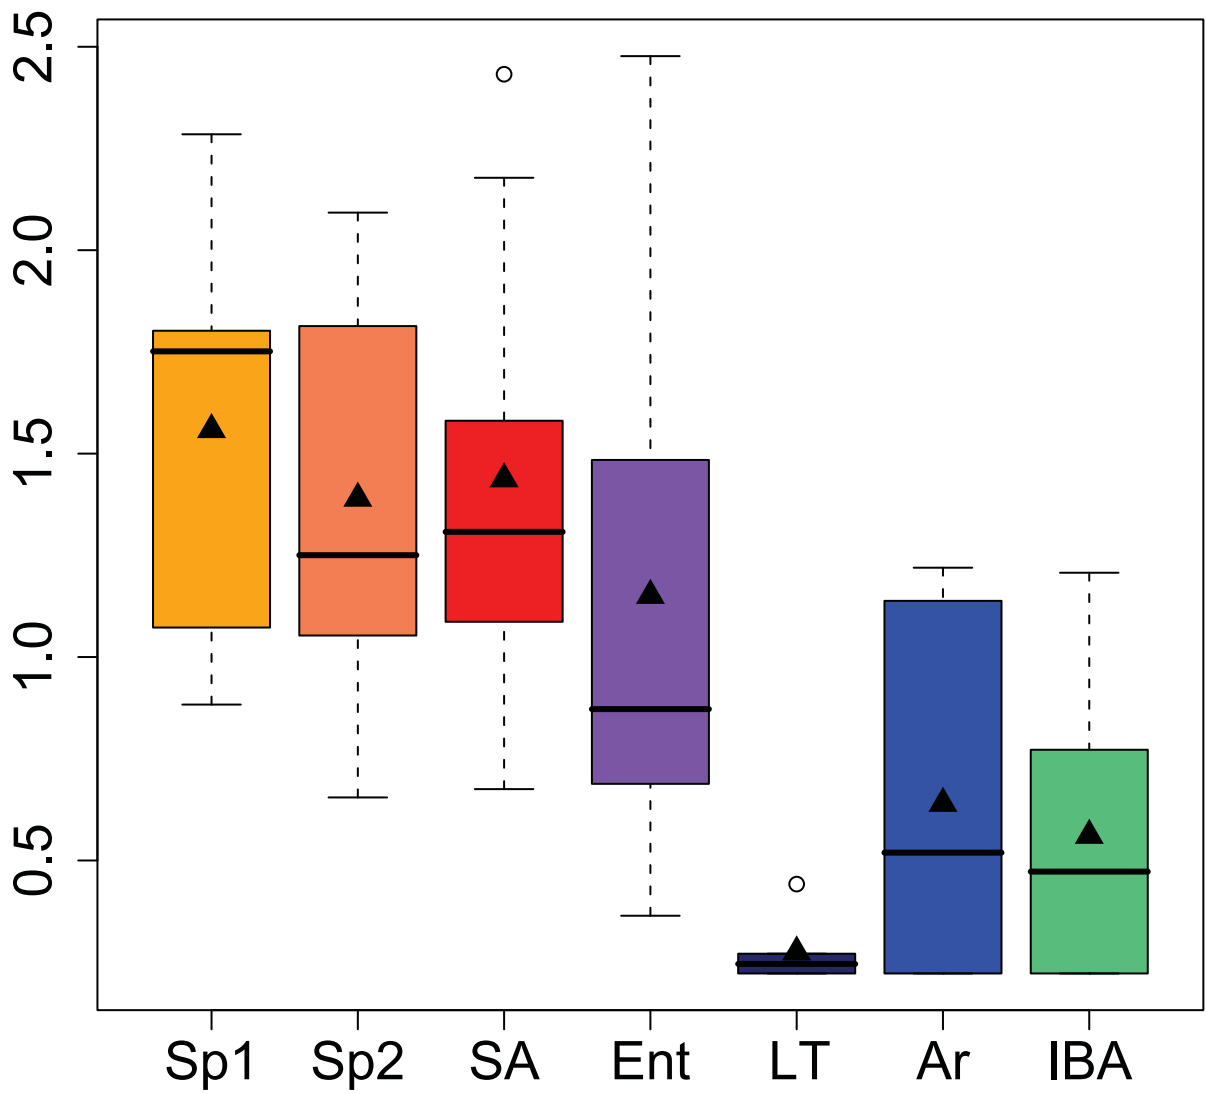

# trans-4-hydroxyproline

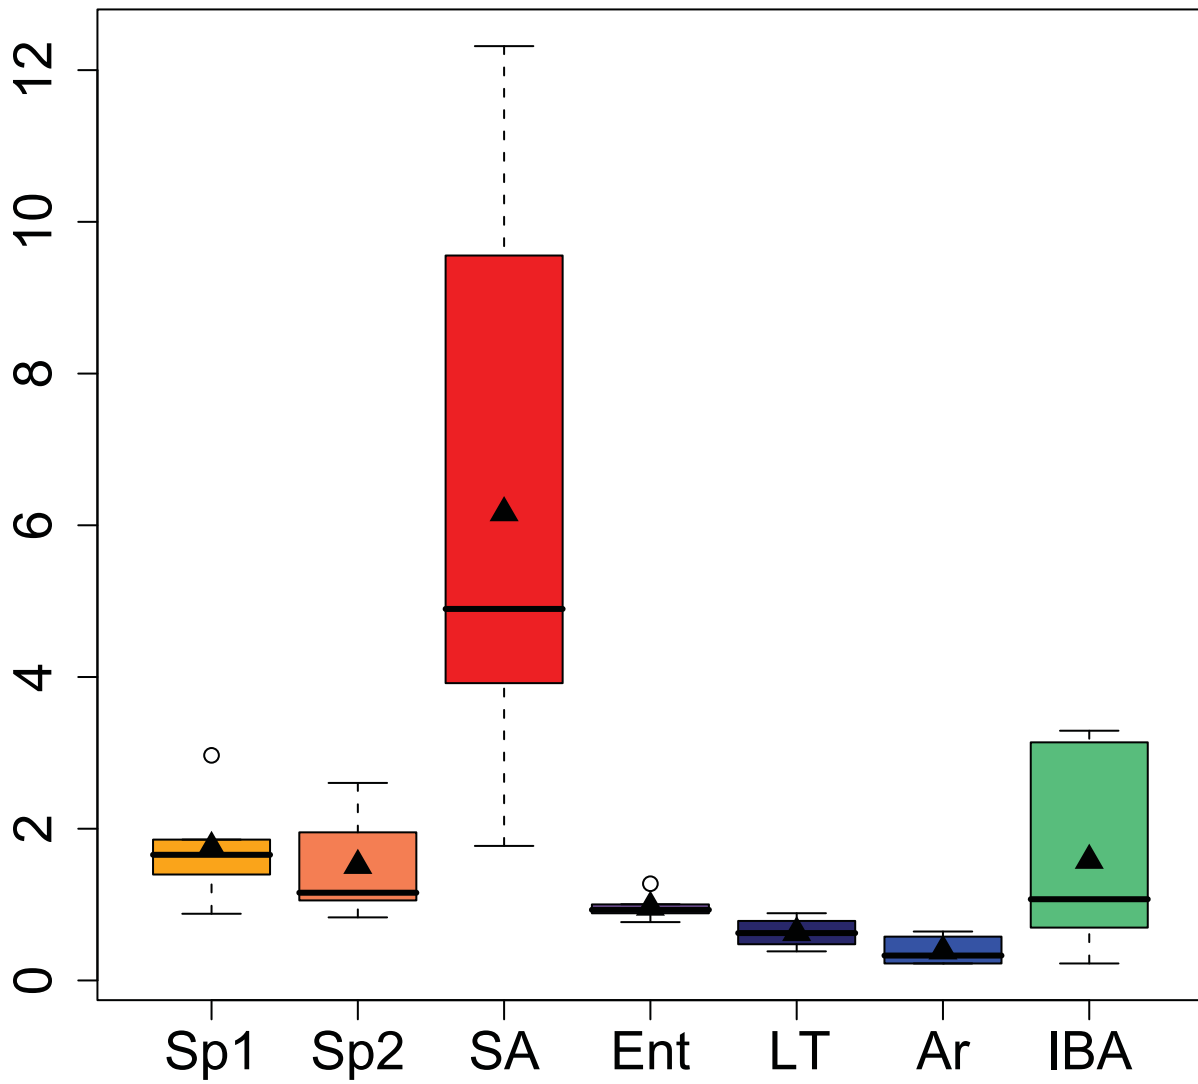

# urea

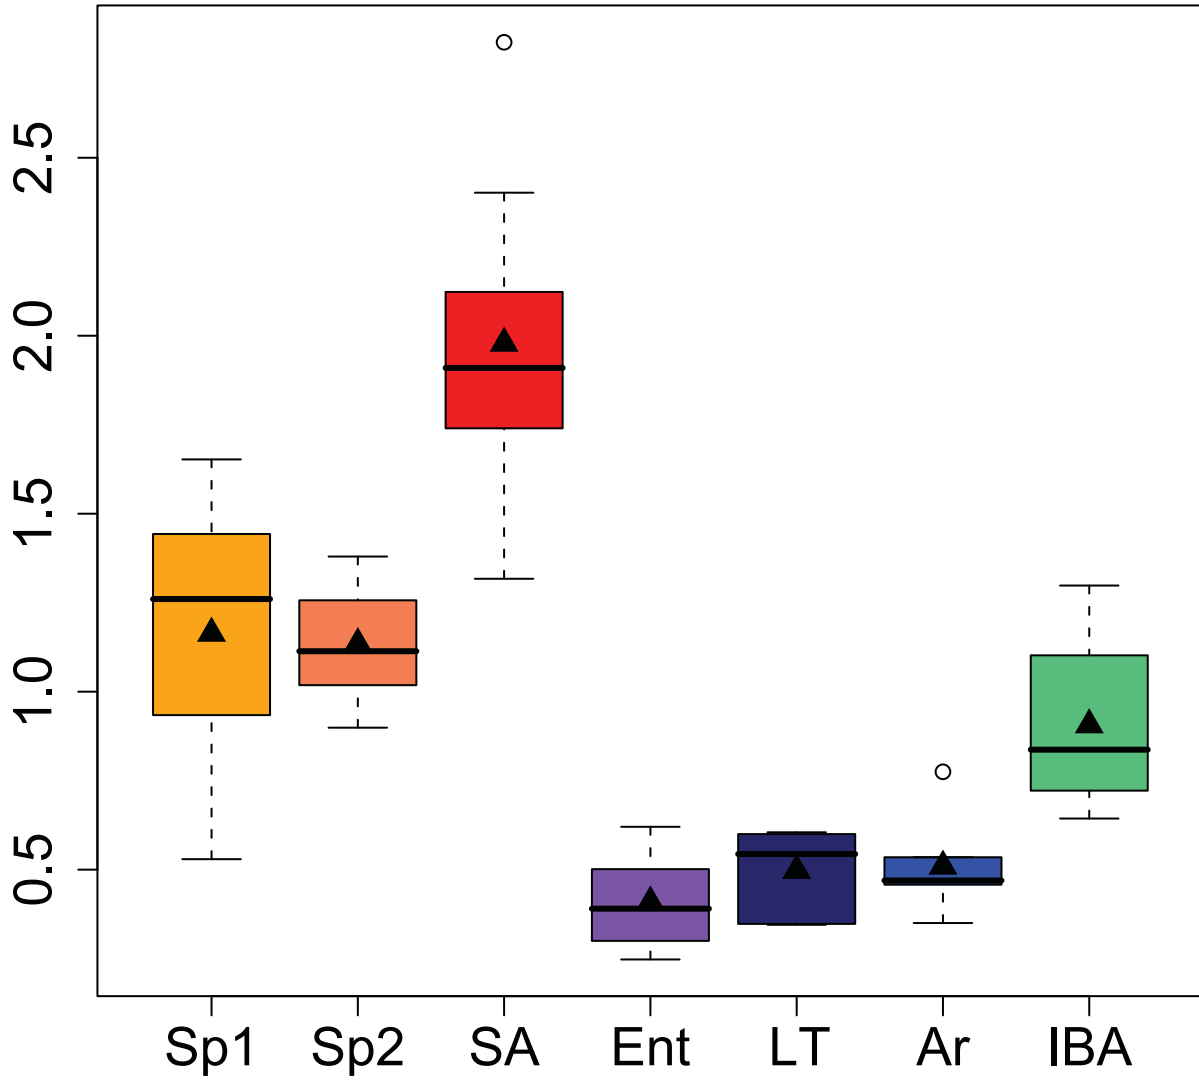

# 2-hydroxyisobutyrate

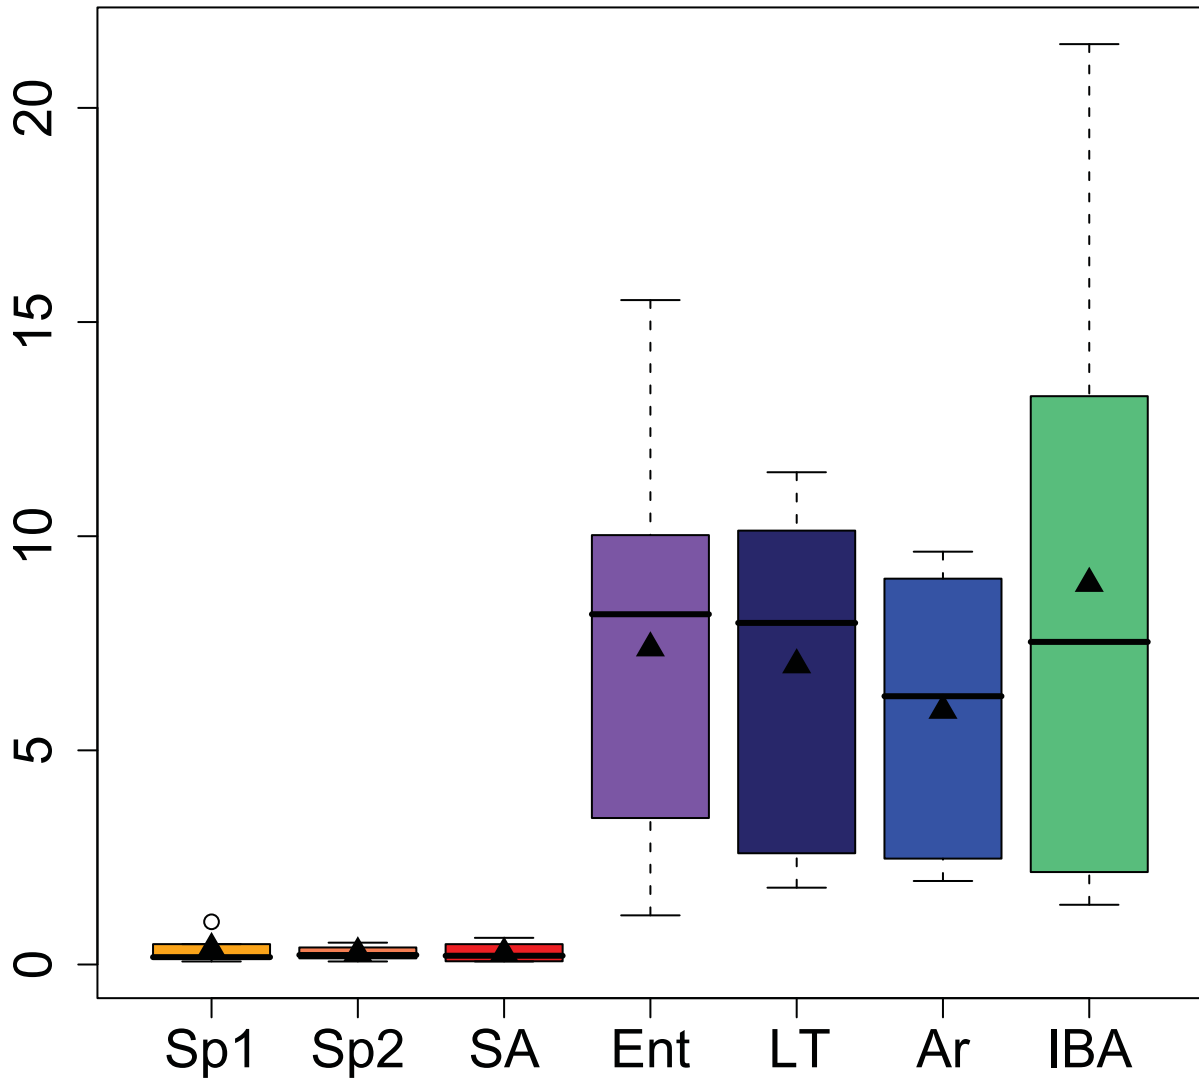

### 3-methyl-2-oxobutyrate

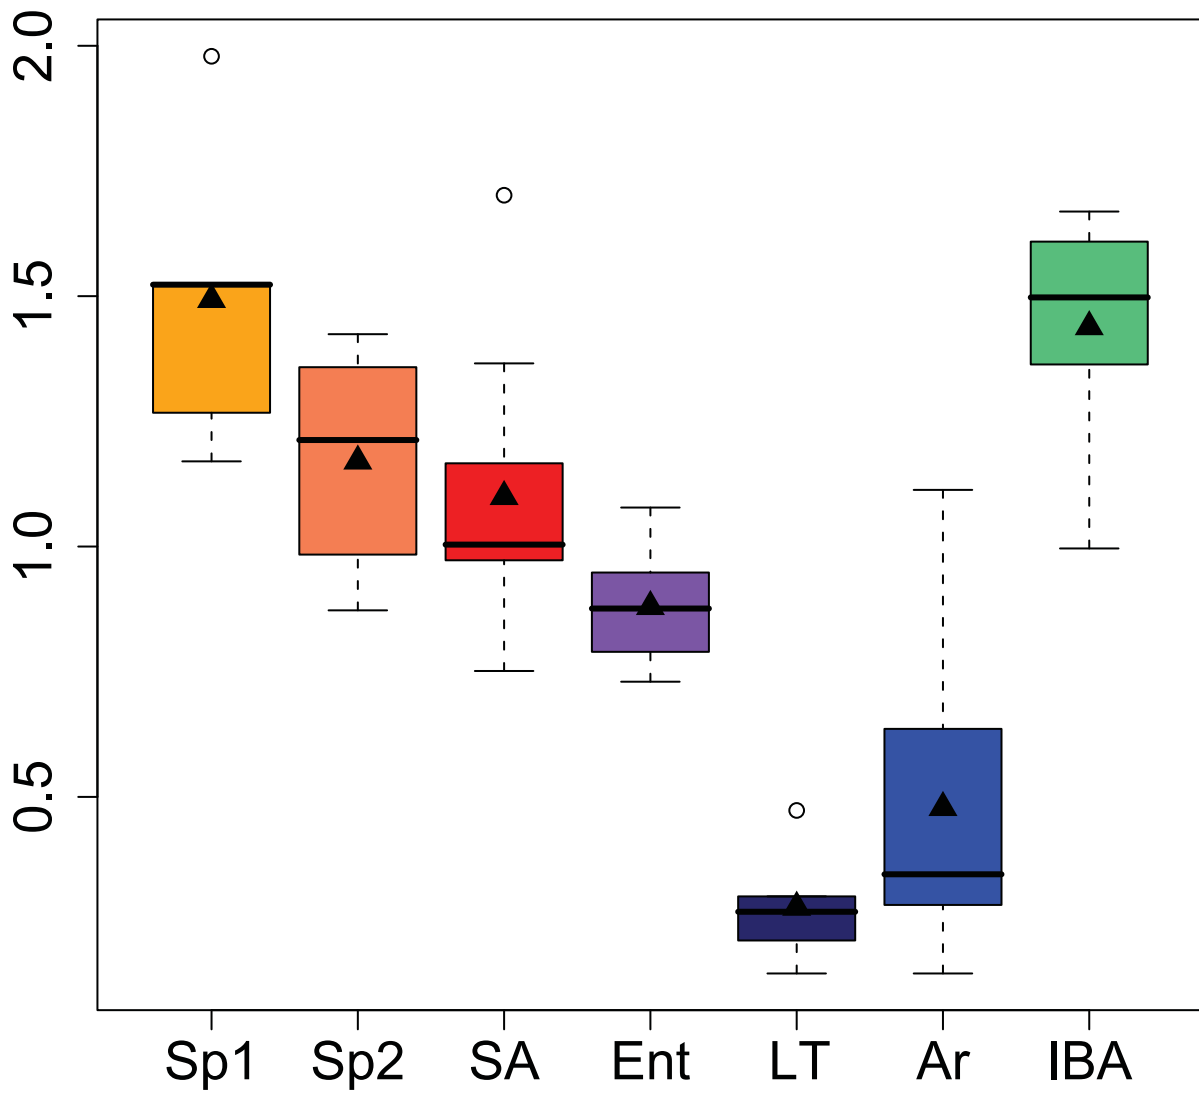

### 3-methyl-2-oxovalerate

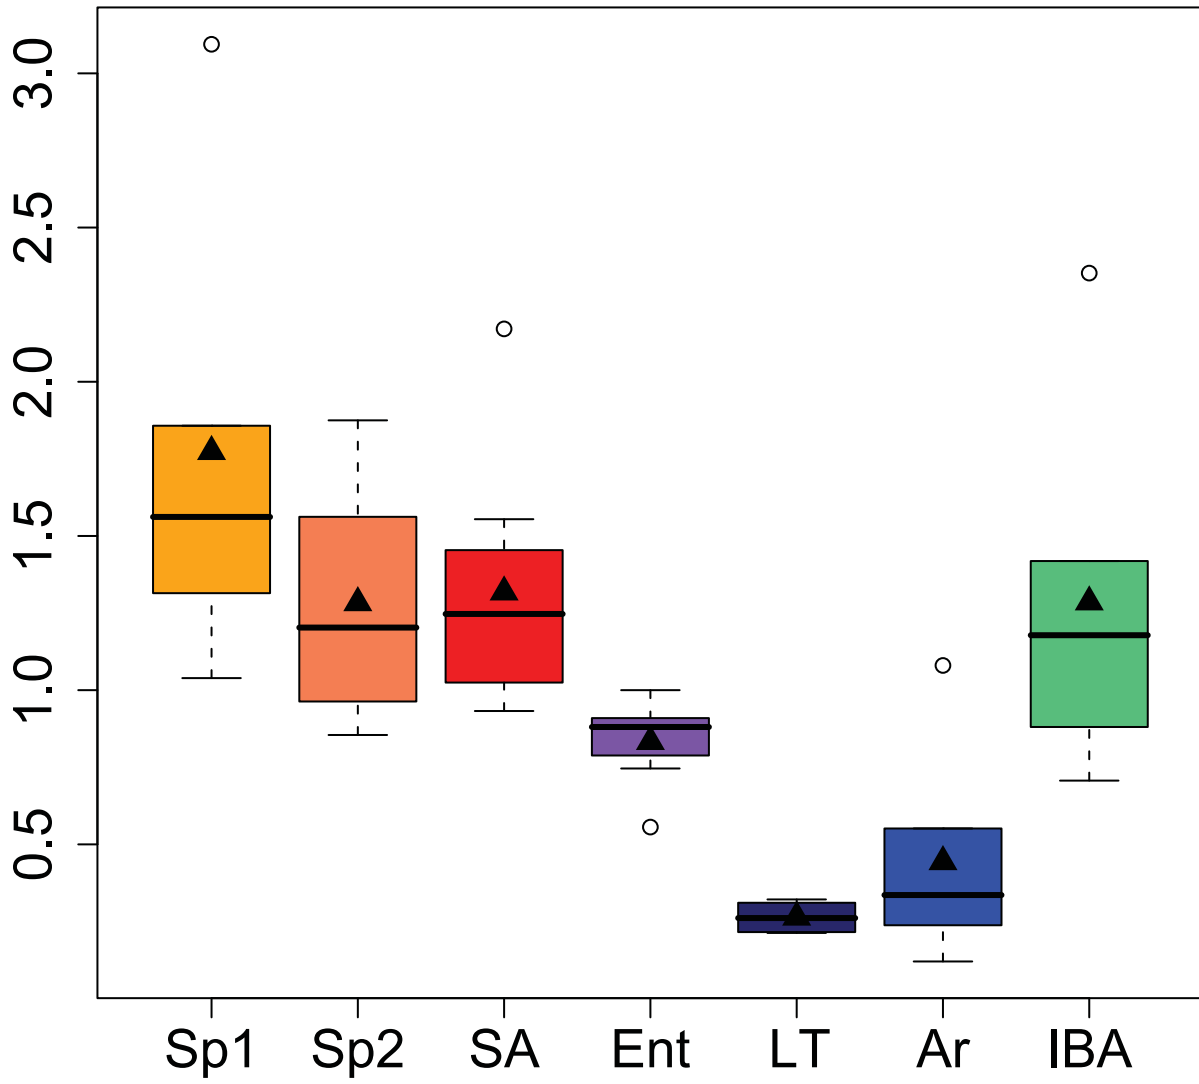

# 4-methyl-2-oxopentanoate

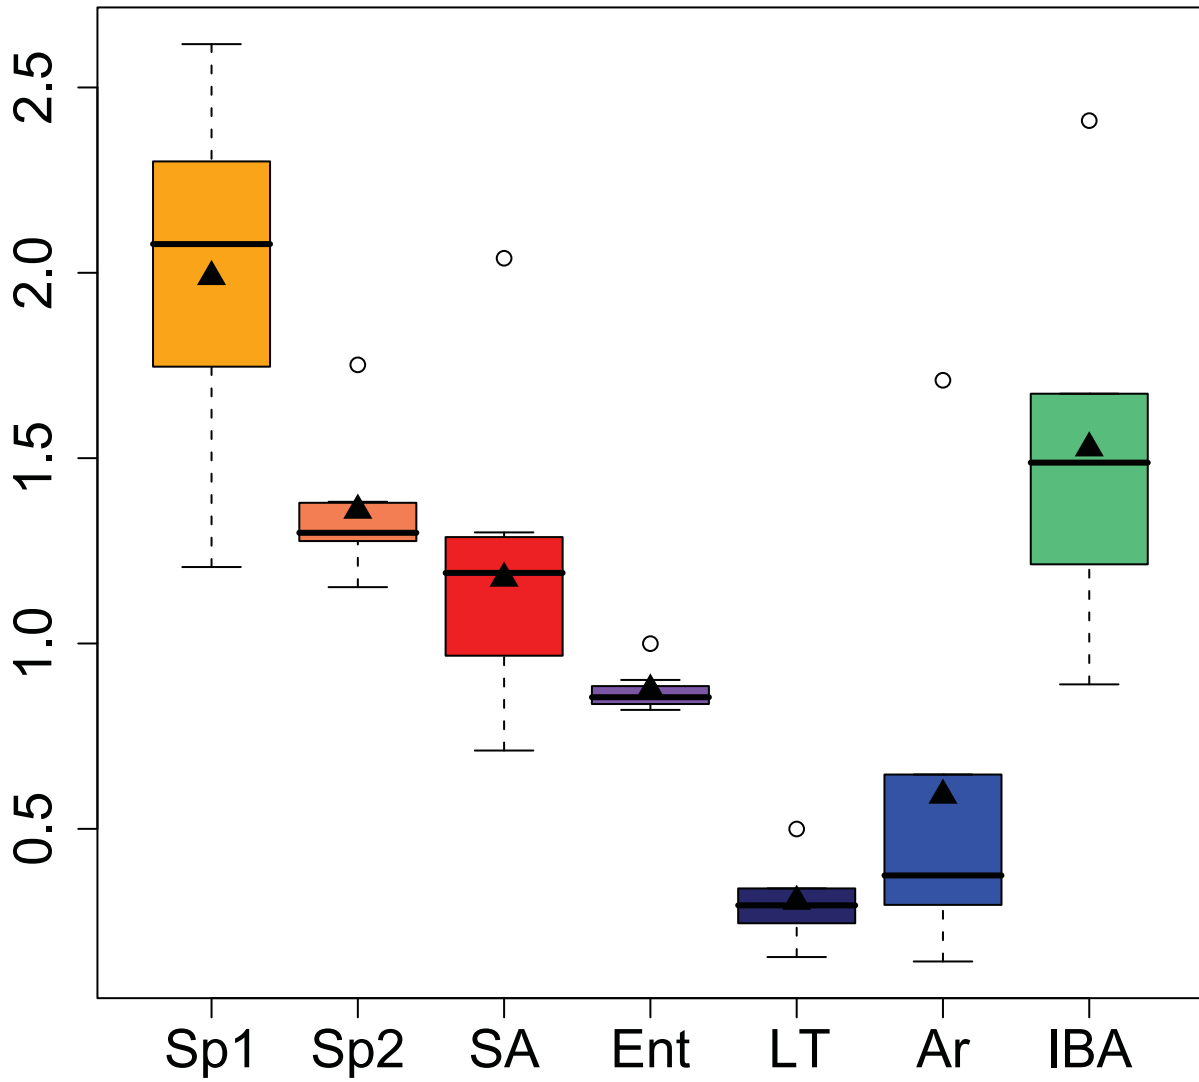

# beta-hydroxyisovalerate

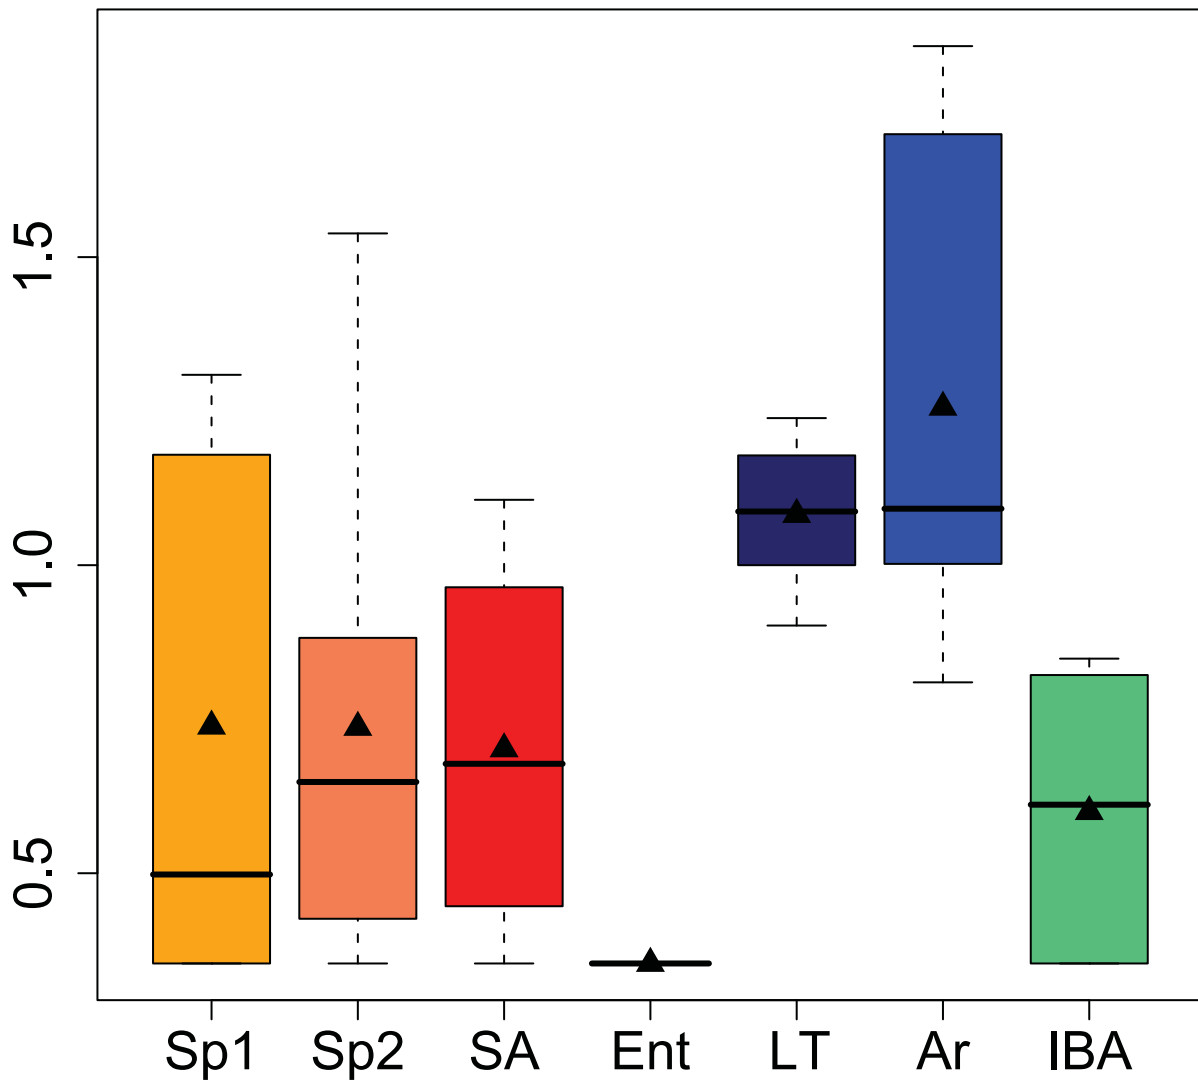



# isoleucine

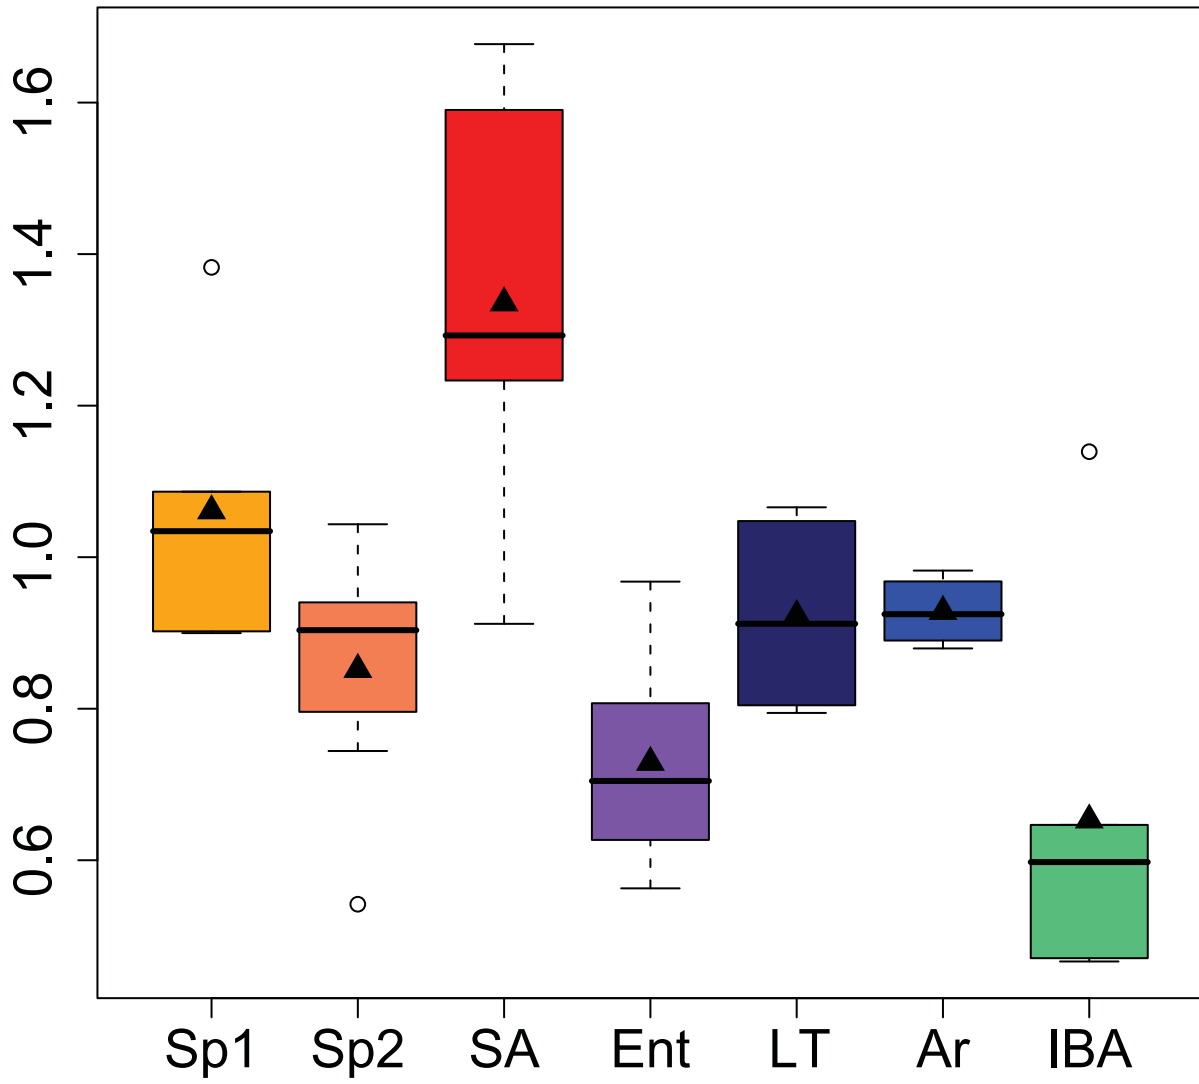

# isovalerylglycine

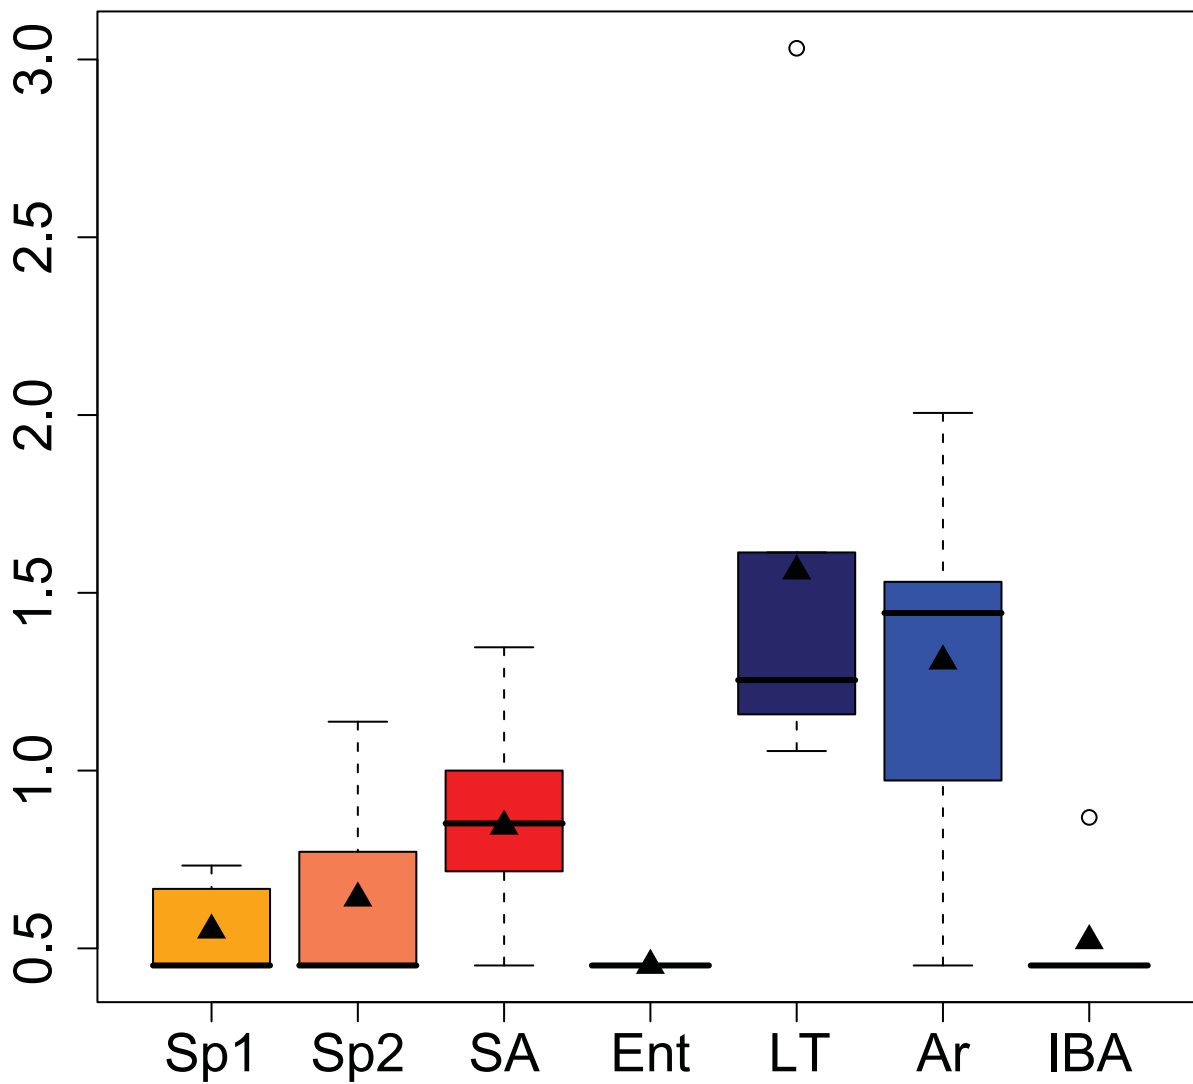

# leucine

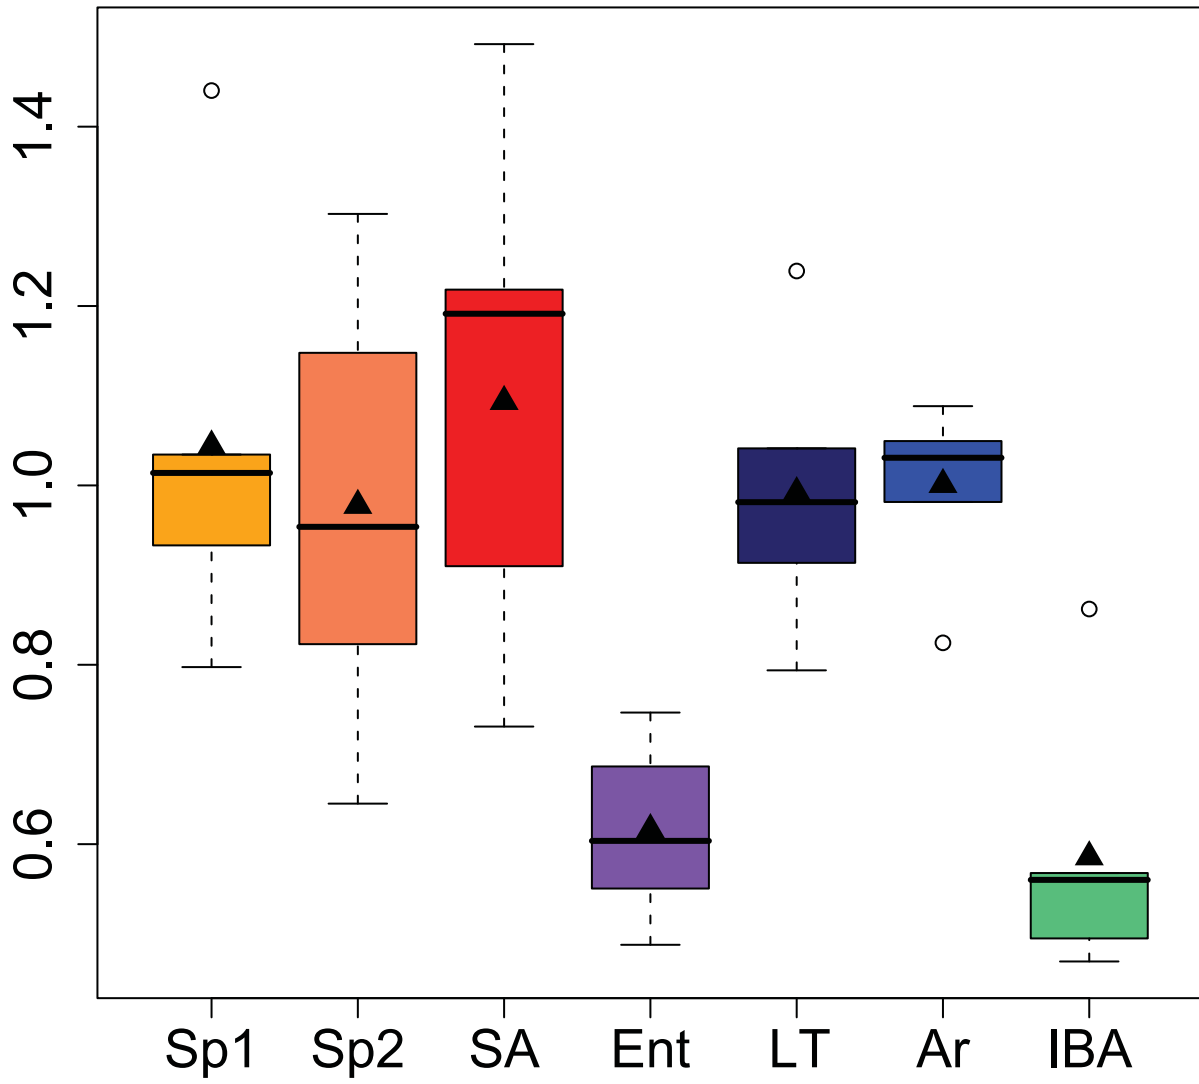

# N-acetylisoleucine

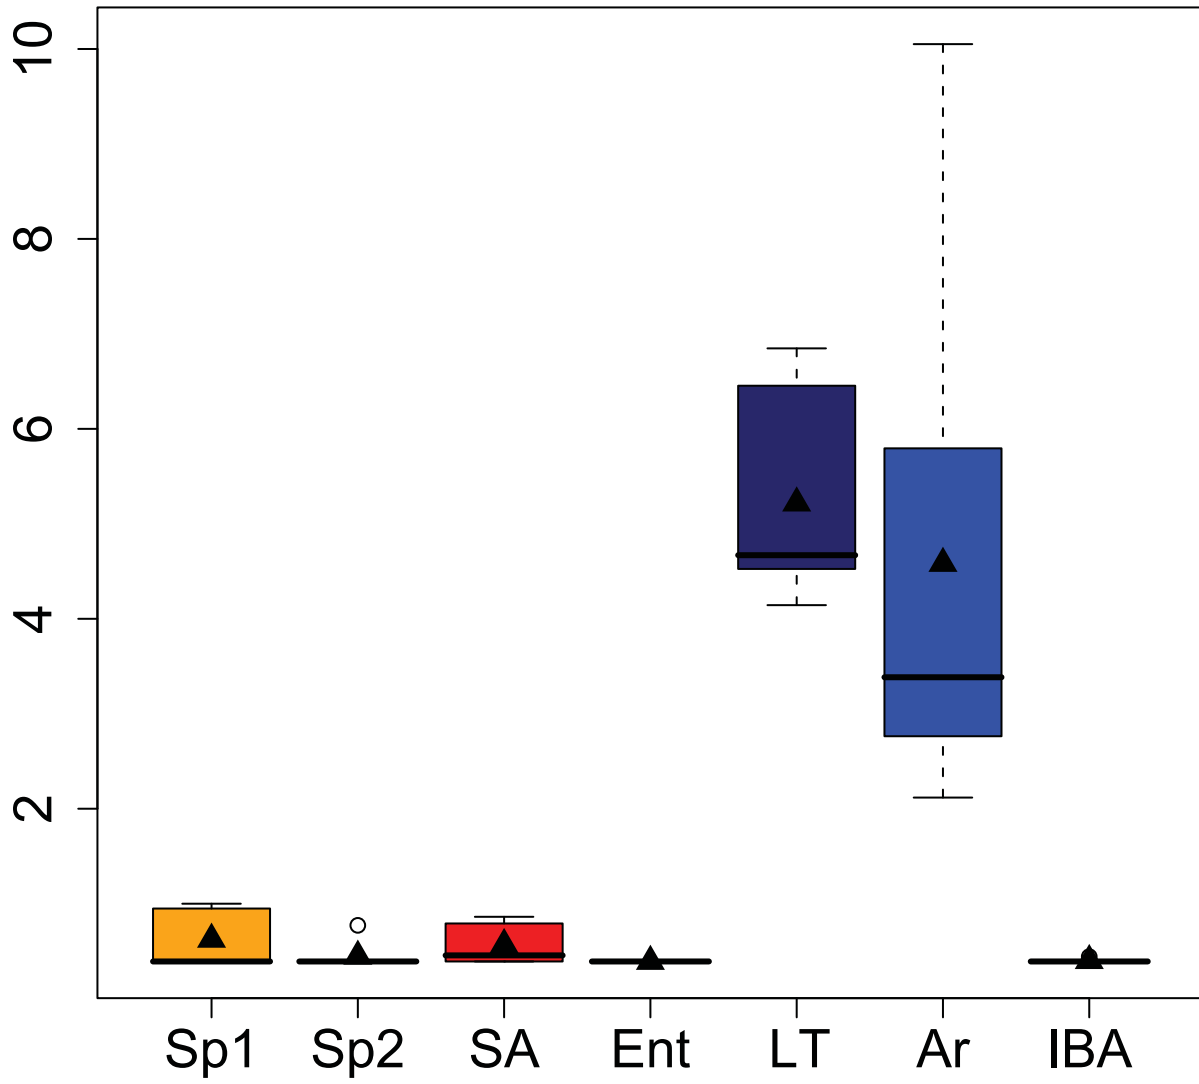

# N-acetylleucine

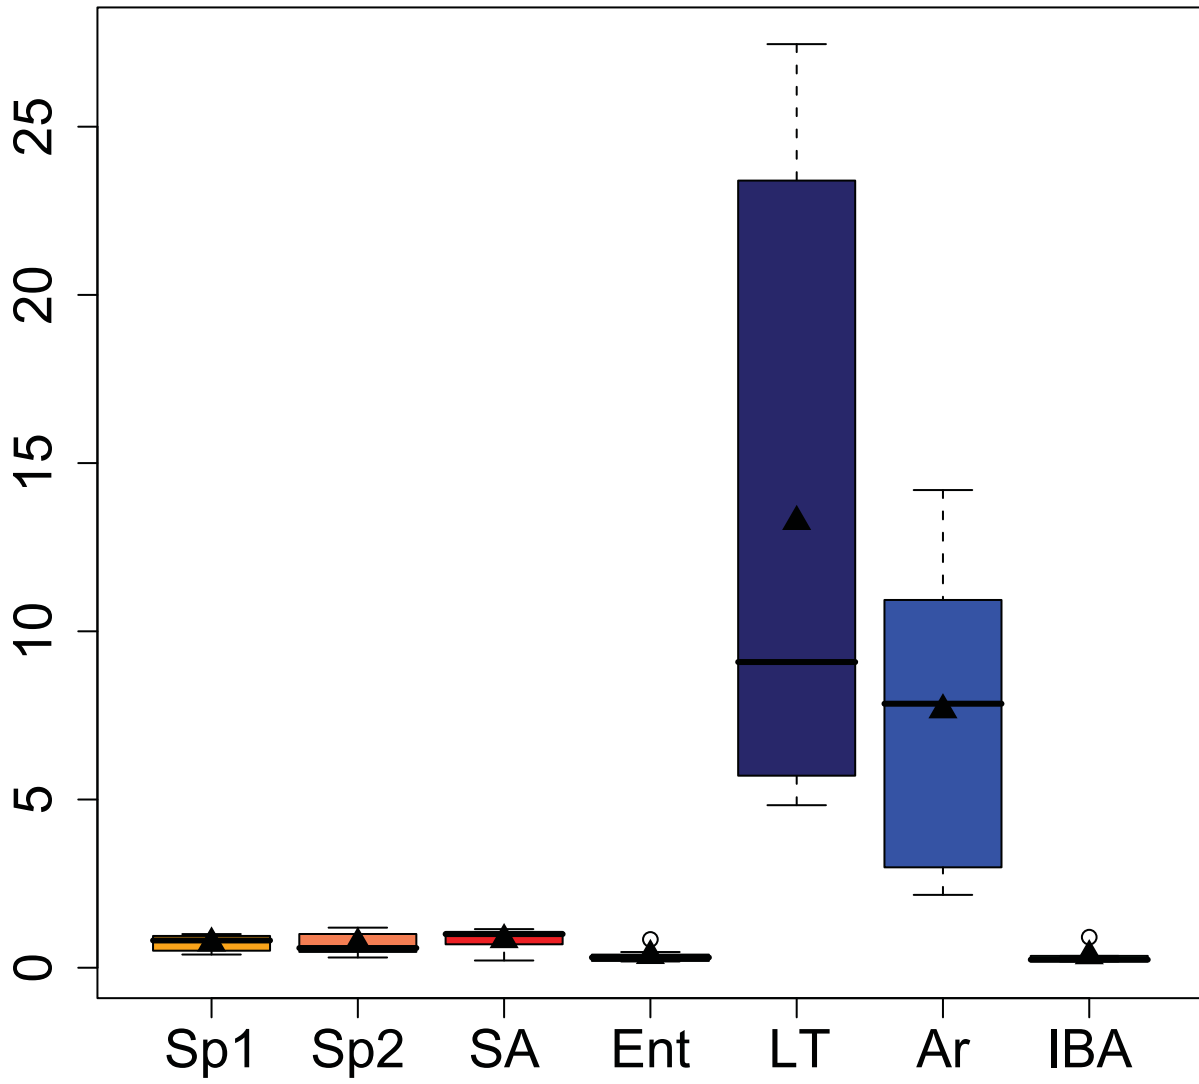

# valine

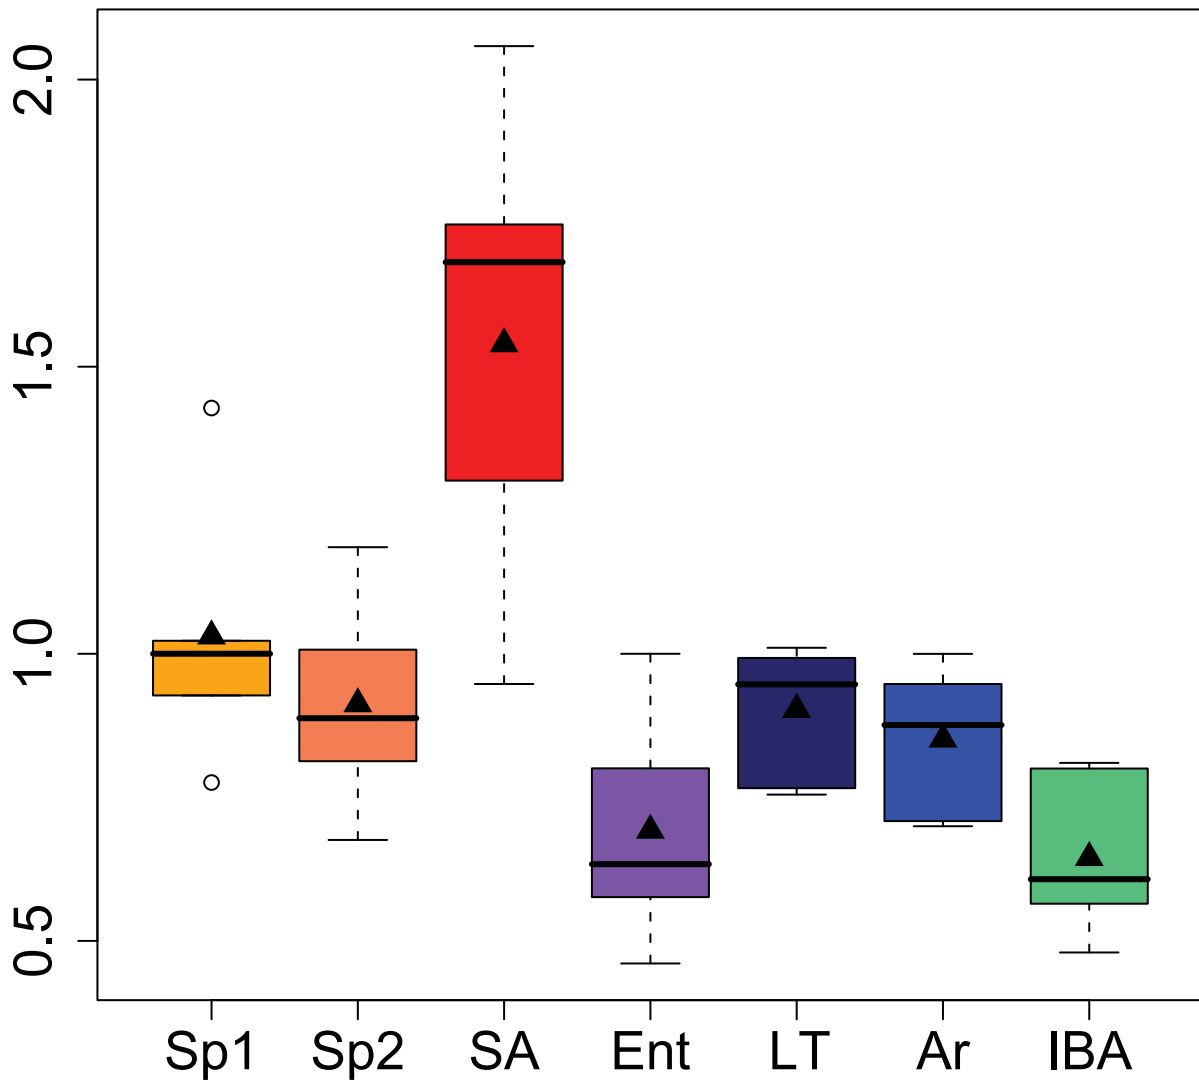

erythronate\*

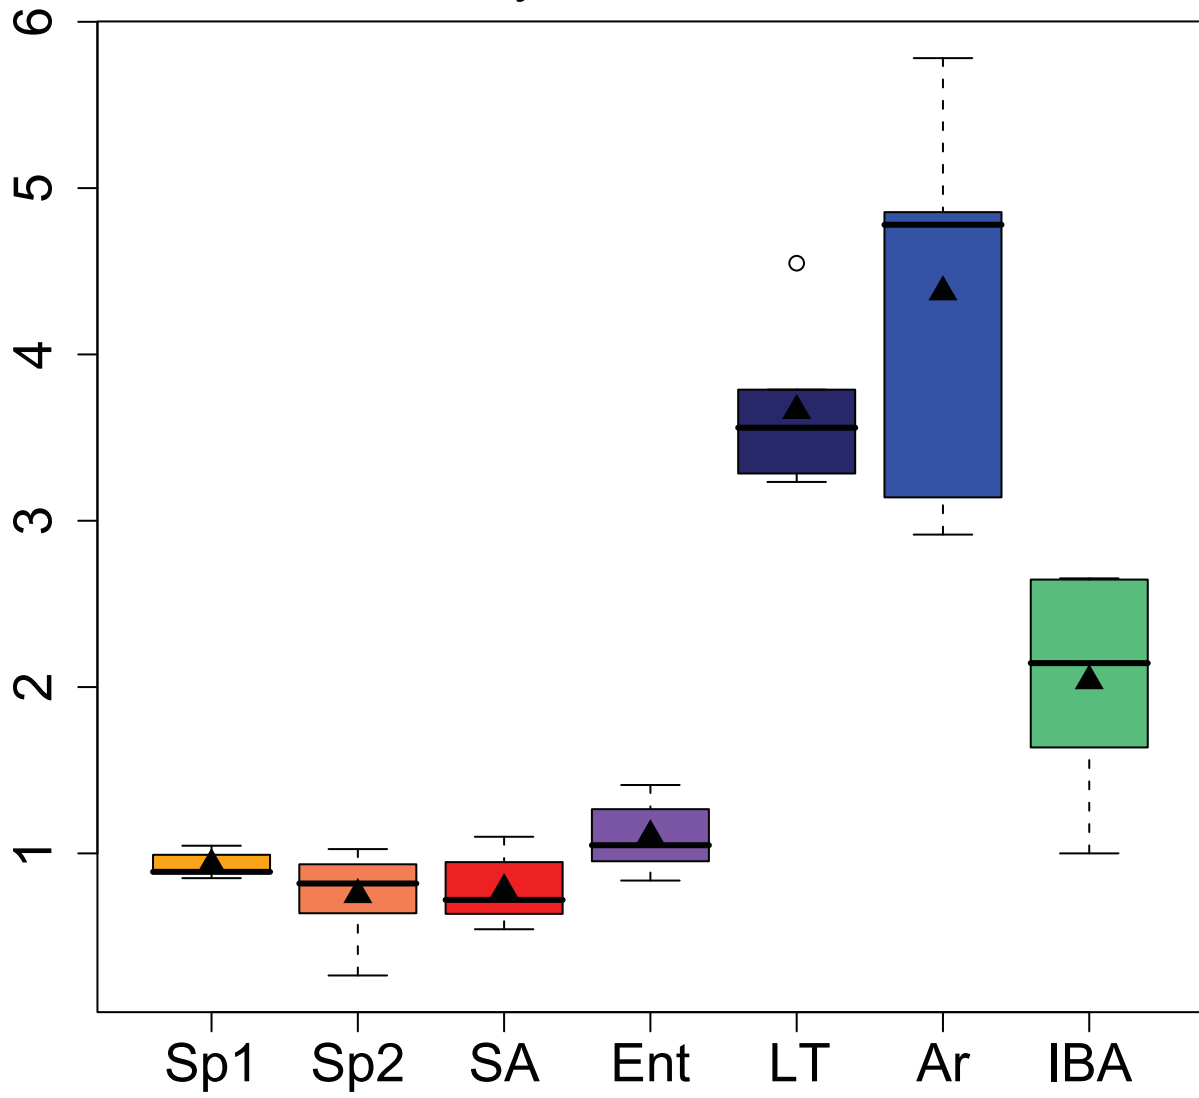

# N-acetylneuraminate

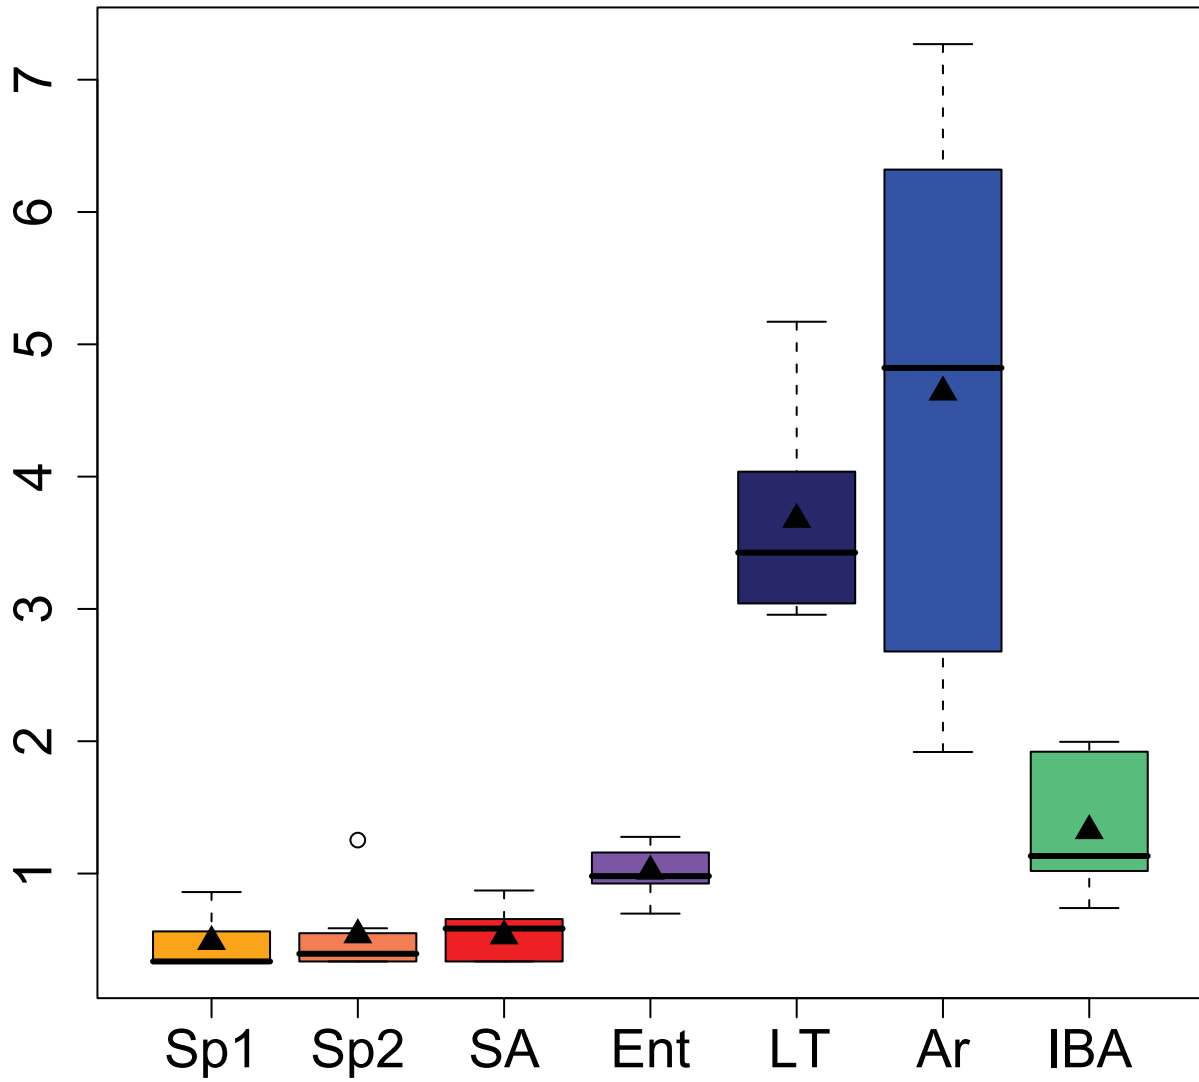



# erythrose

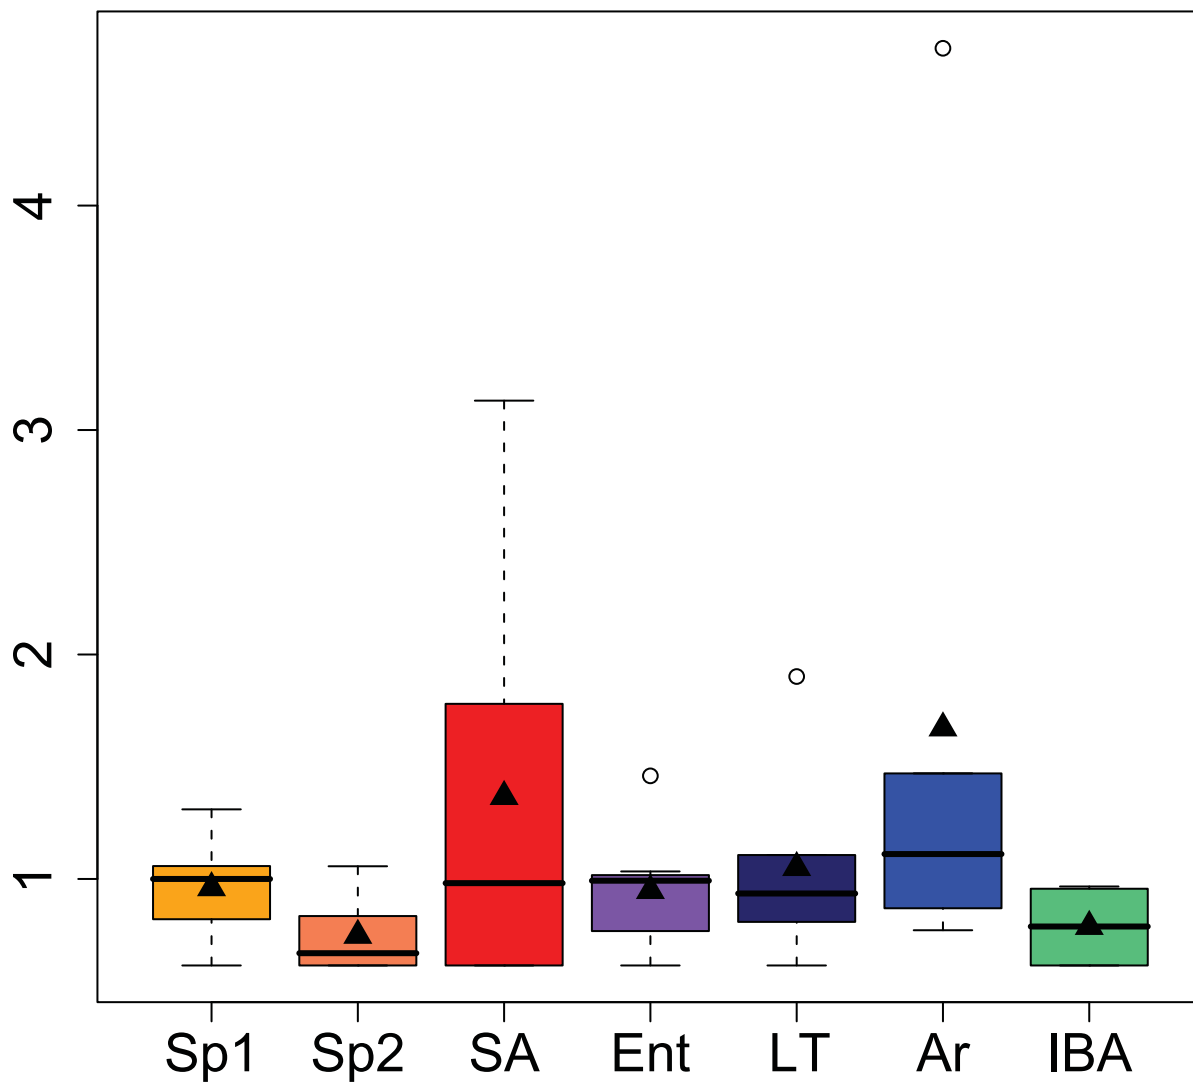

# fructose

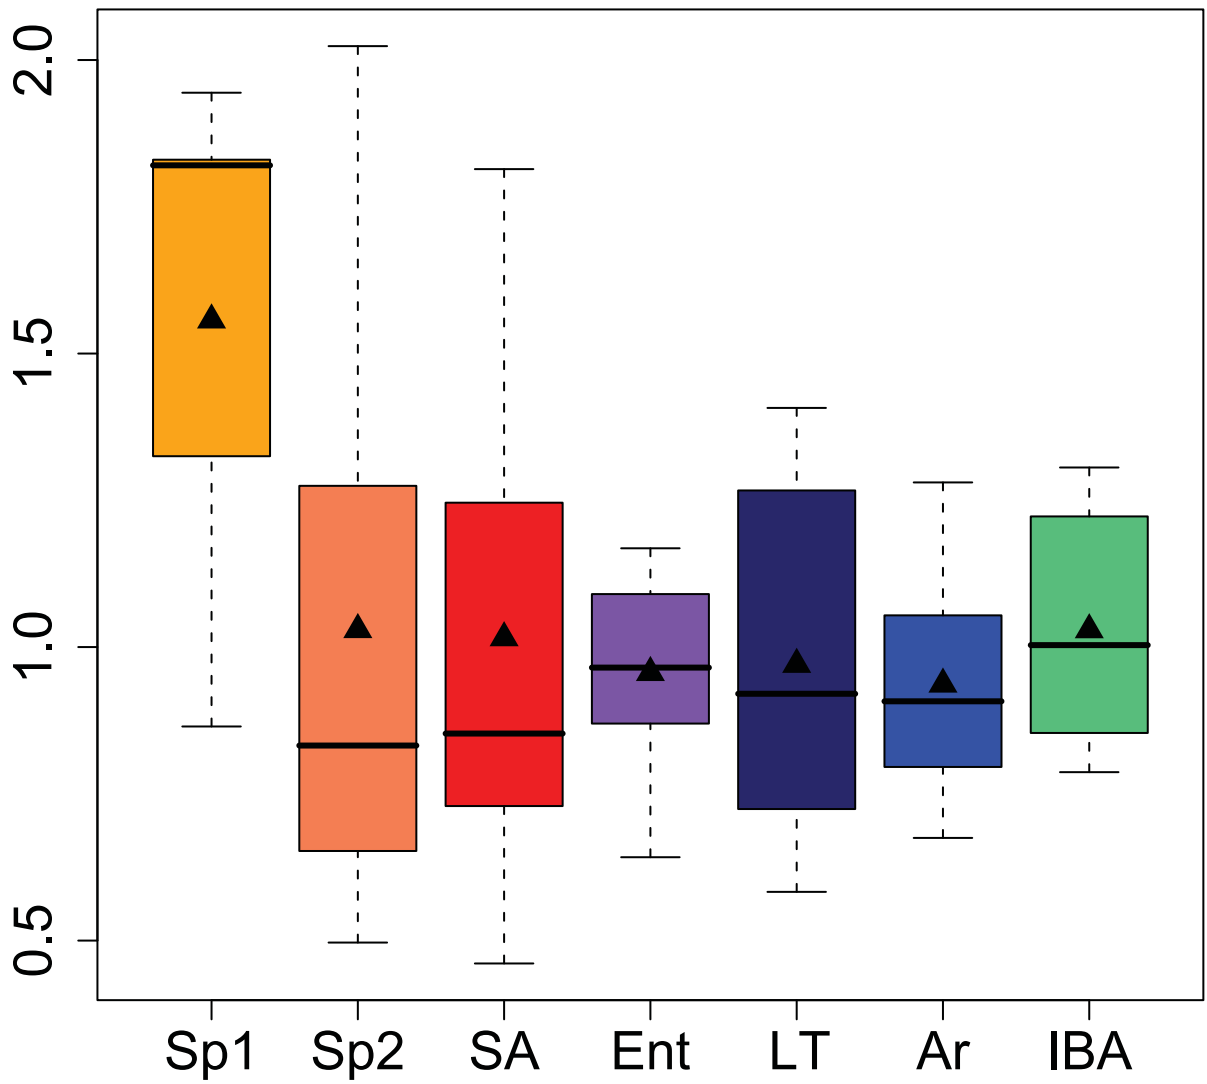

mannose

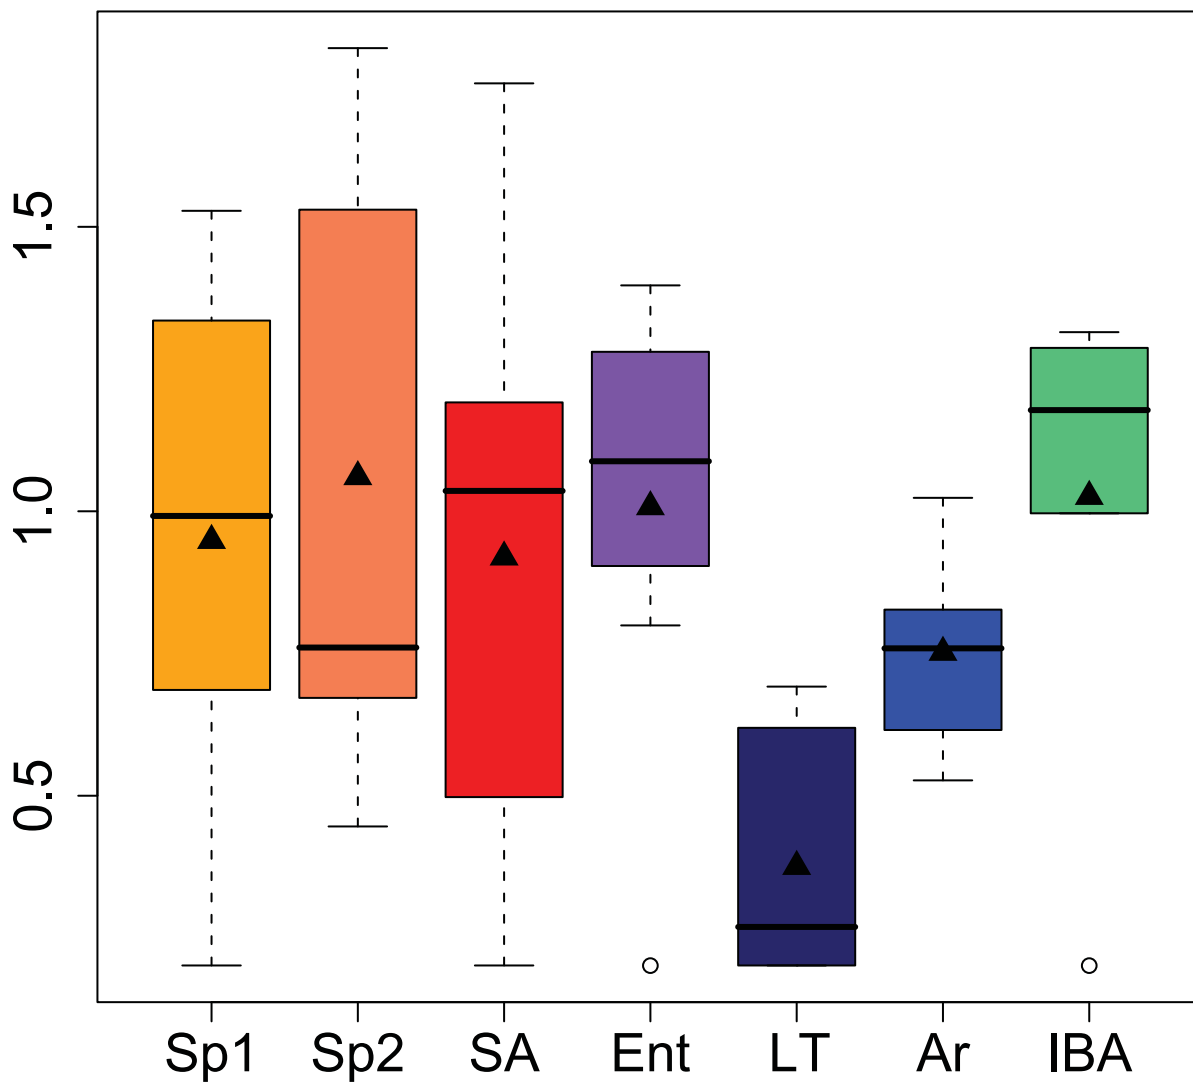

sorbitol (glucitol)

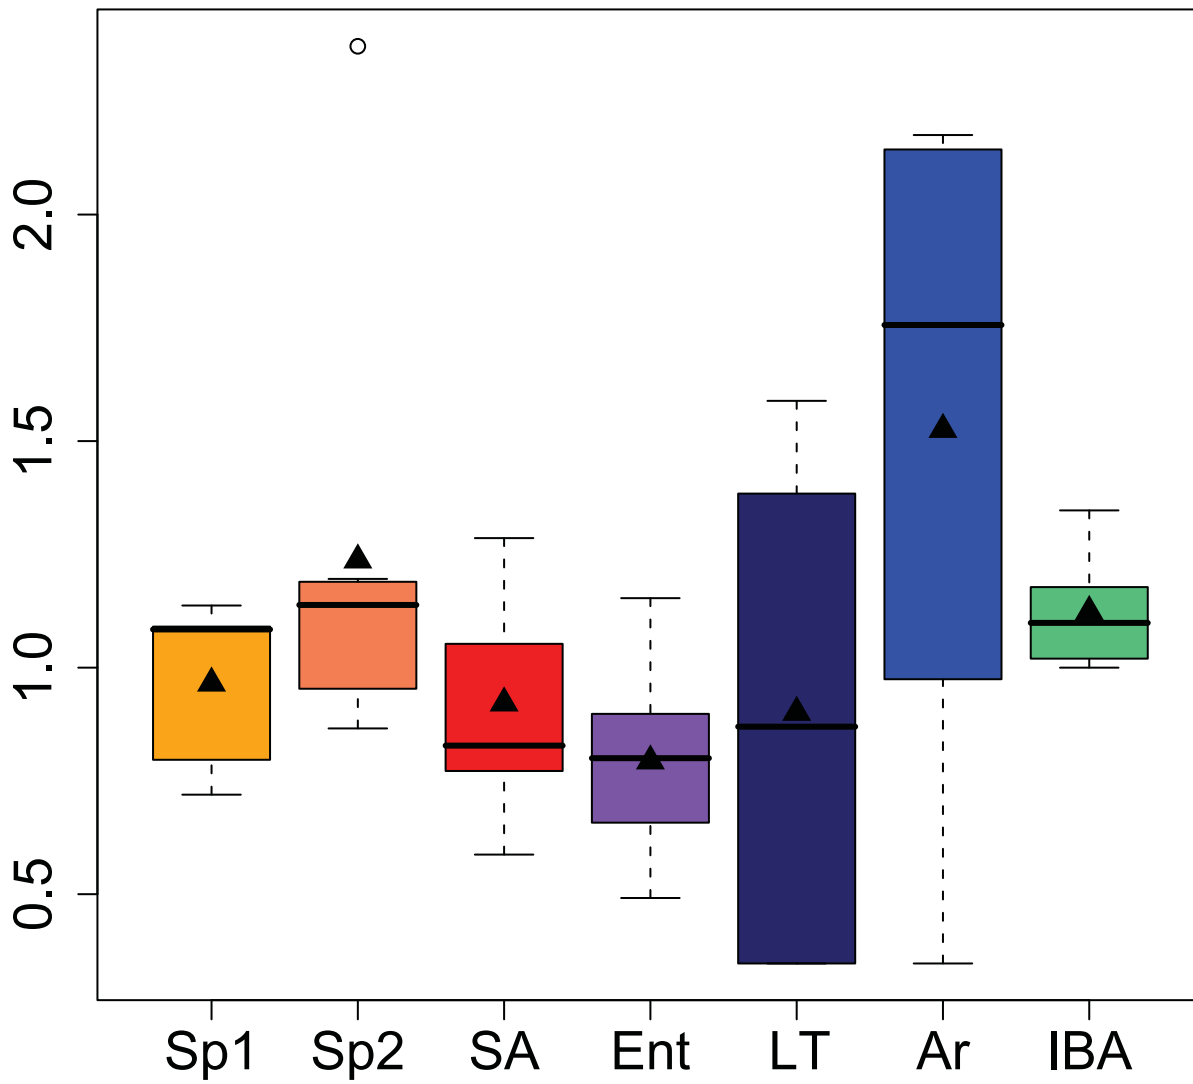

sorbose

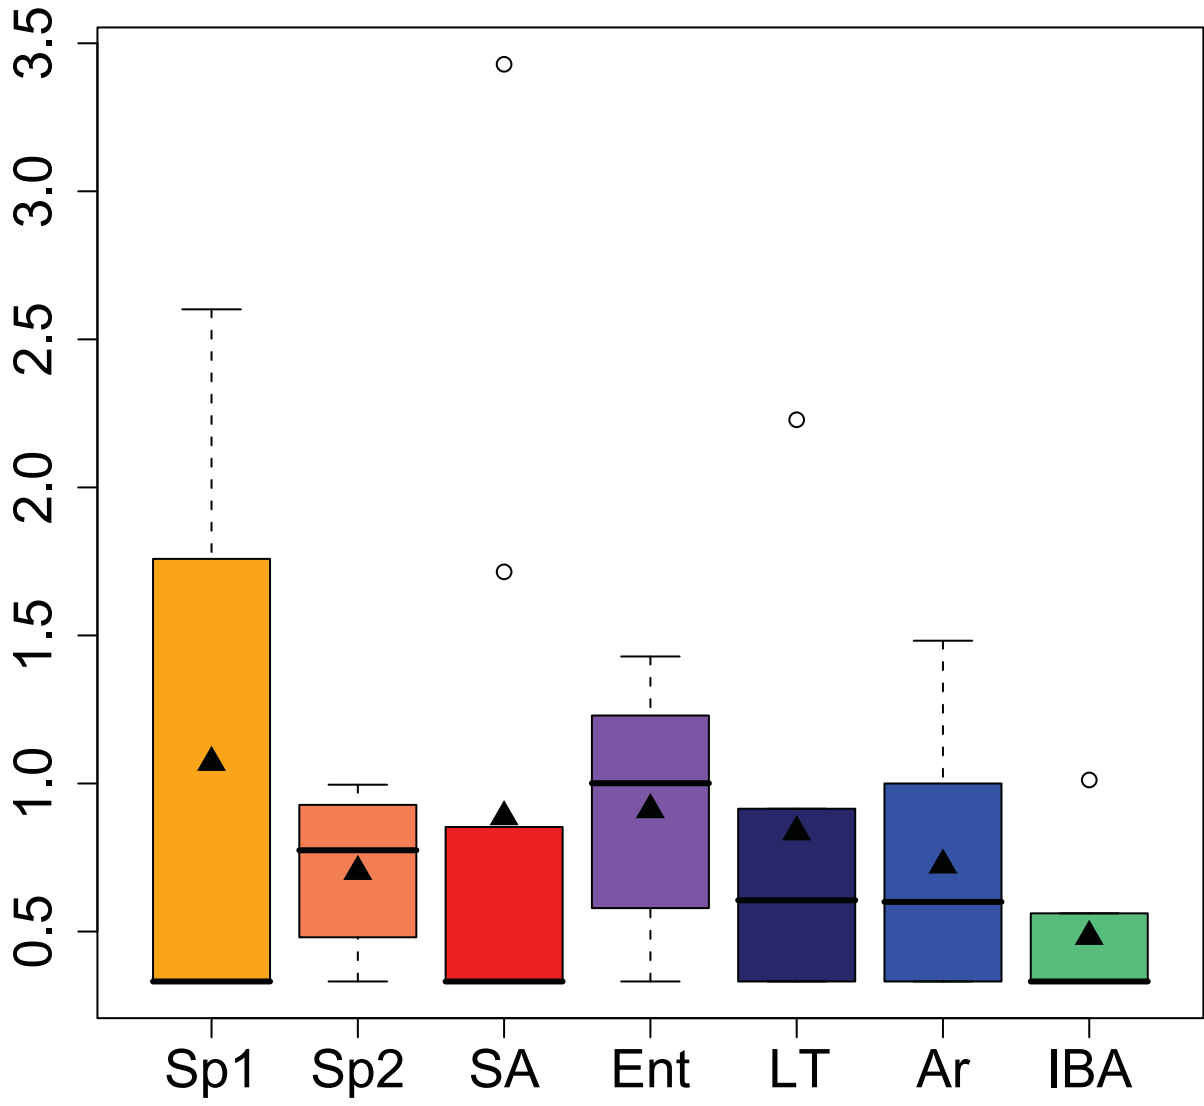

# stachyose

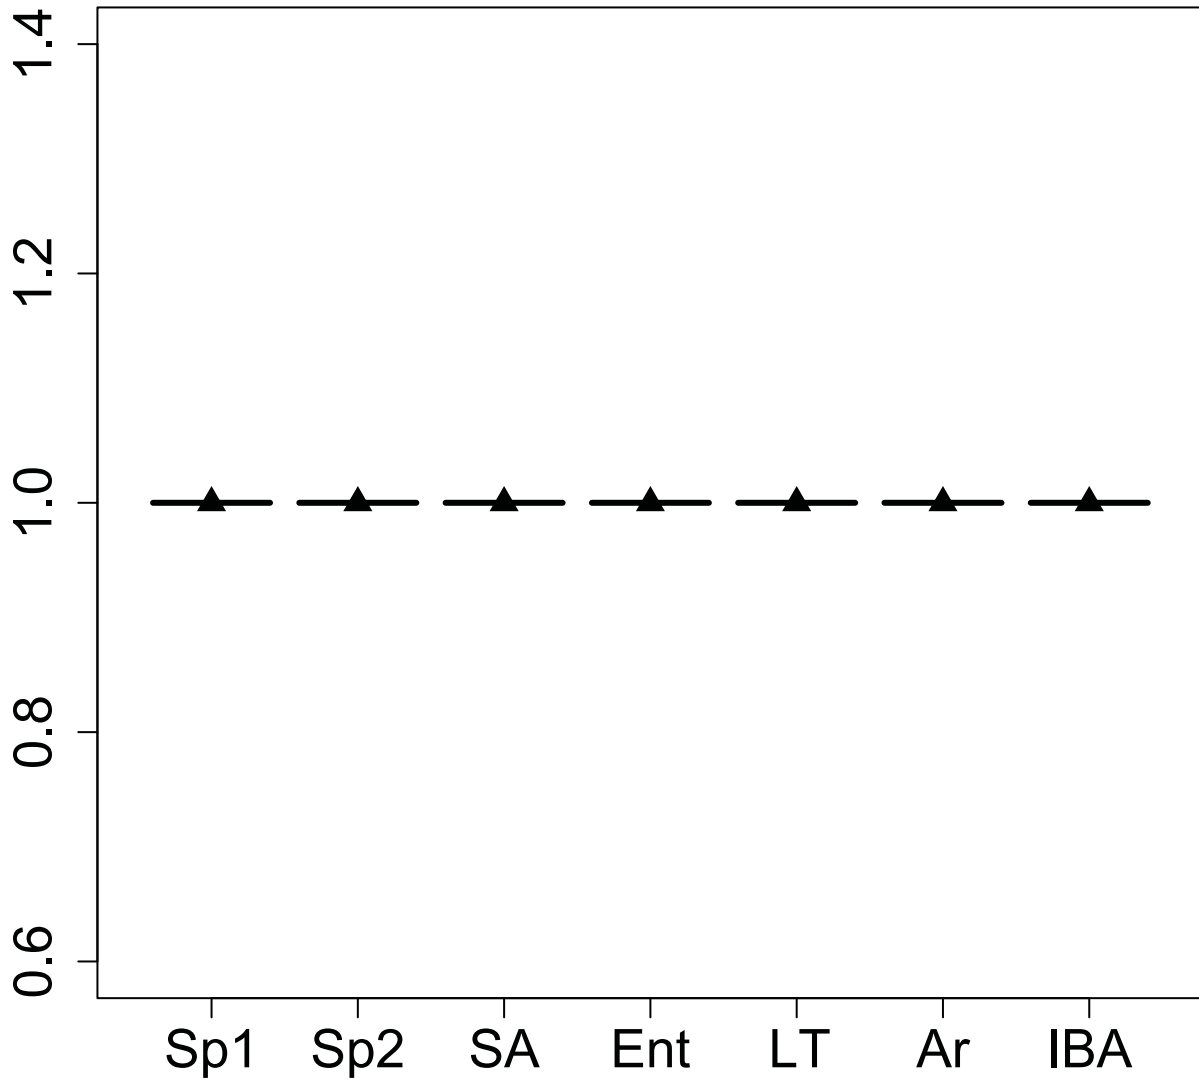



# glucose

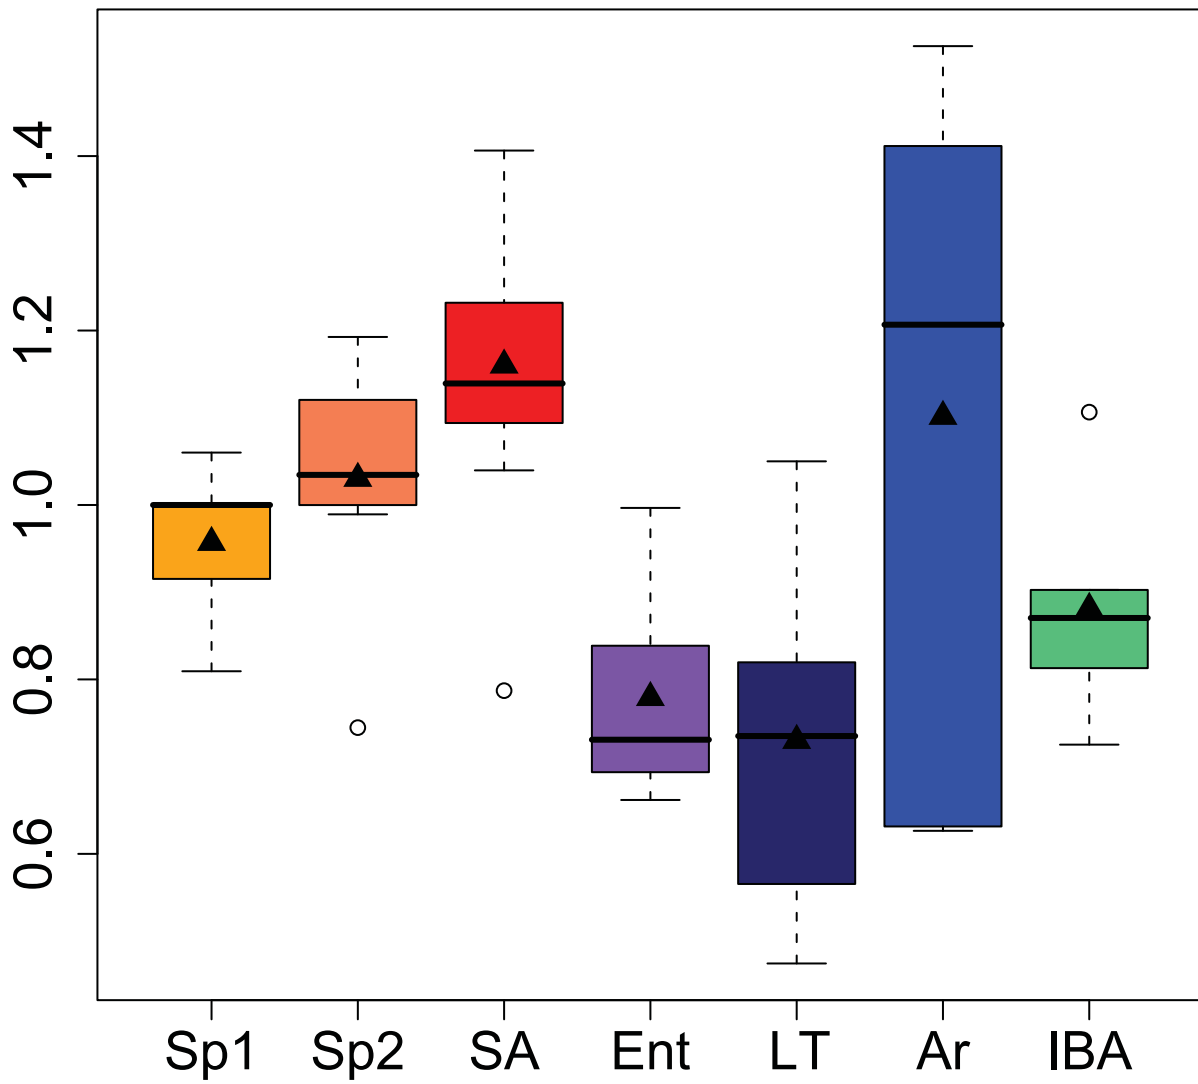



# glycerate

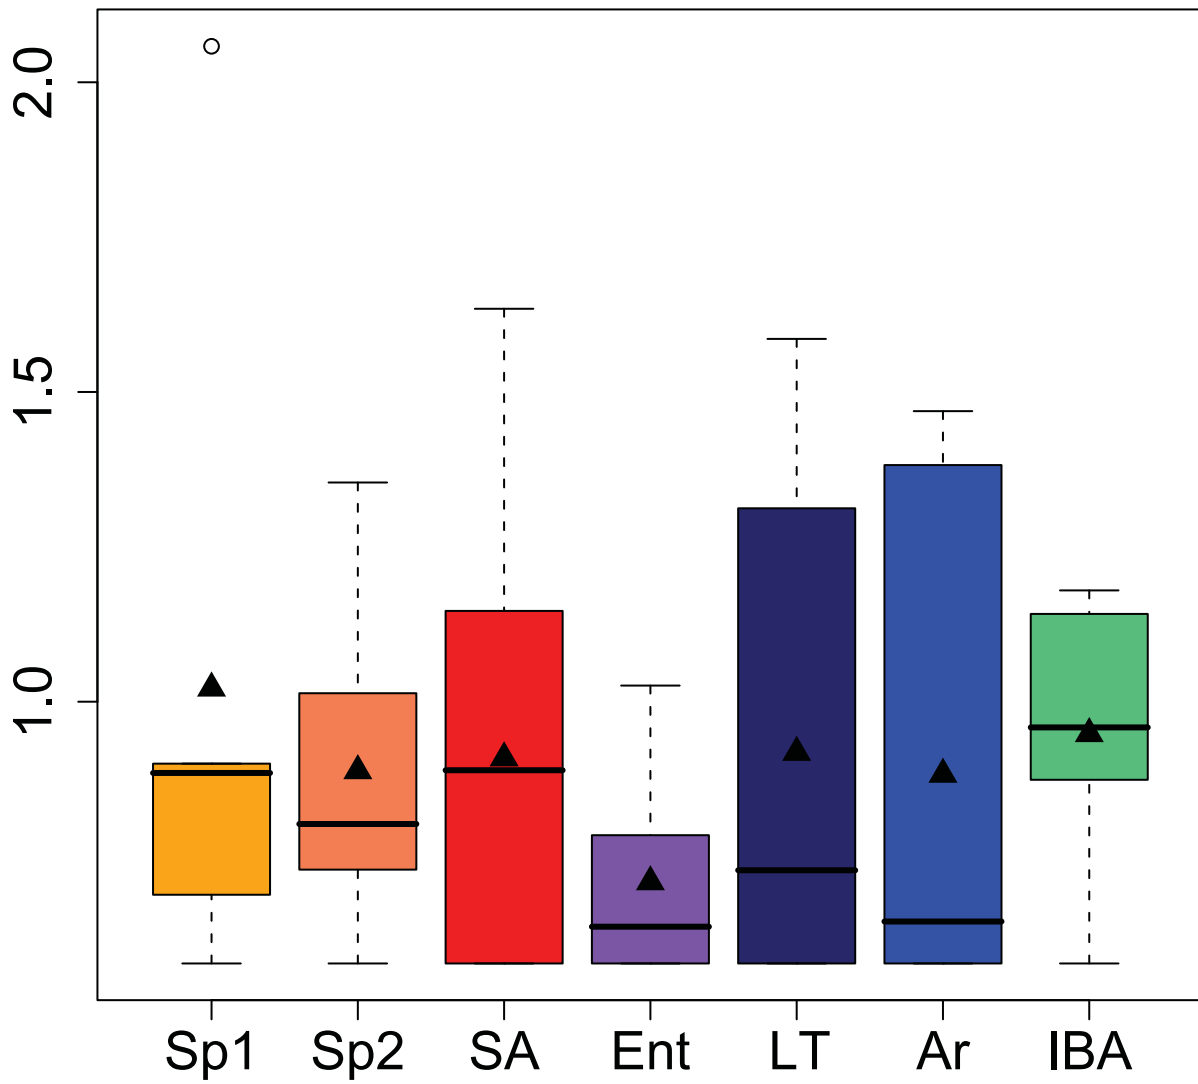

# lactate

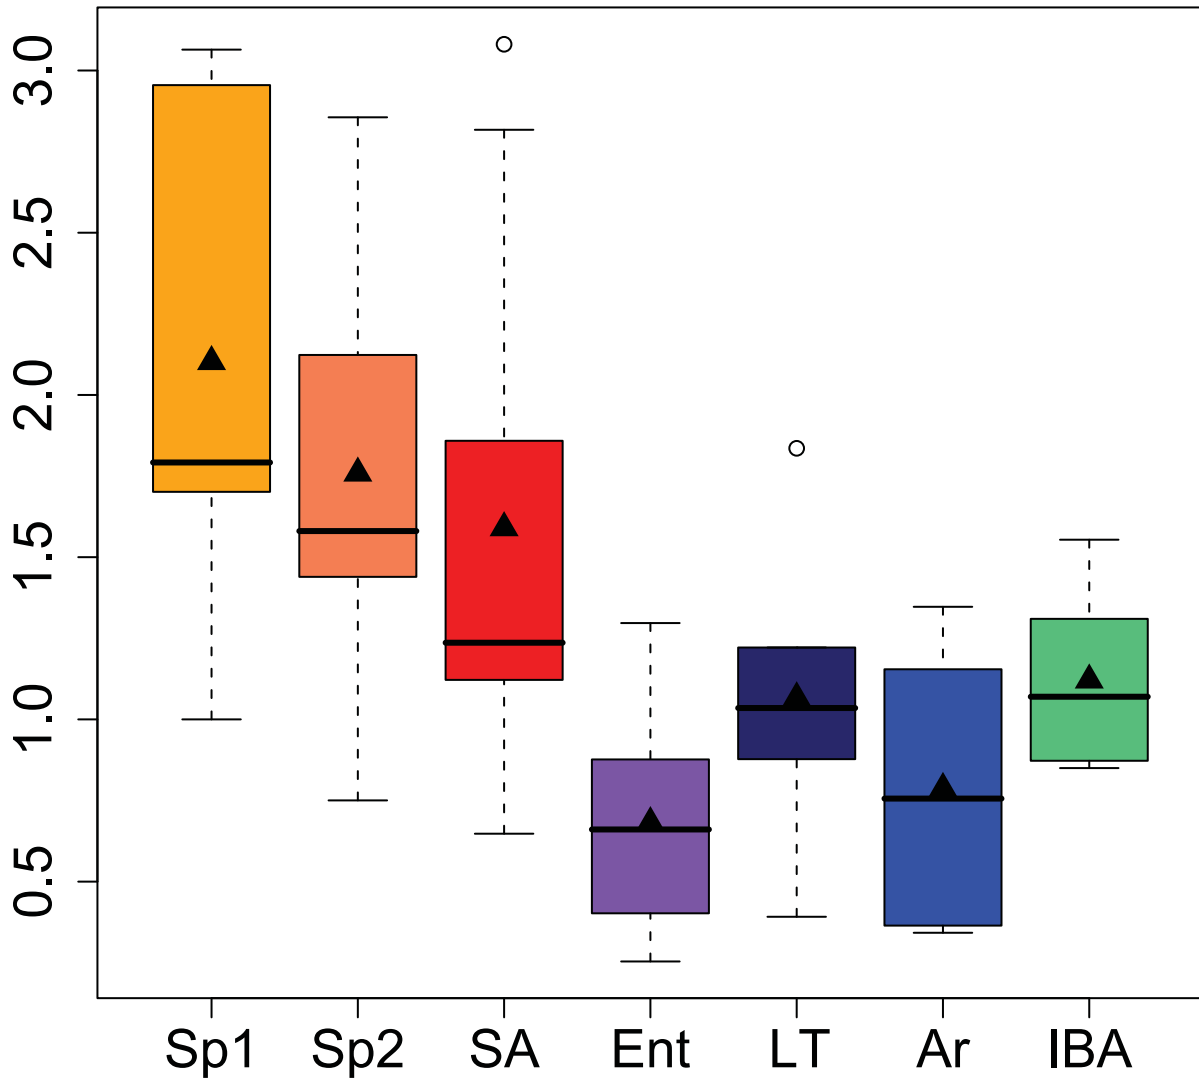

# pyruvate

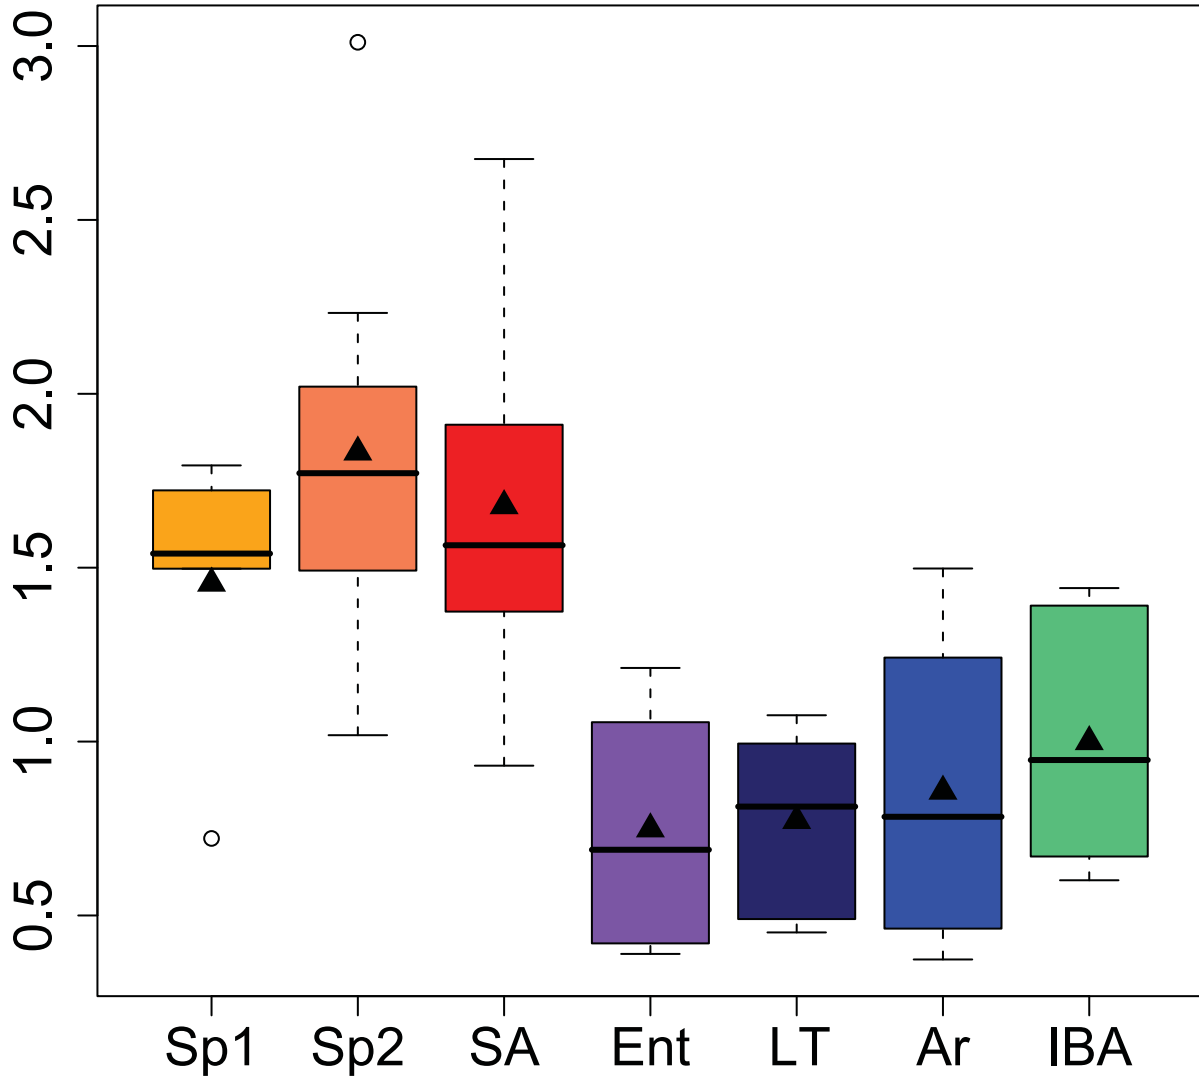

# gluconate

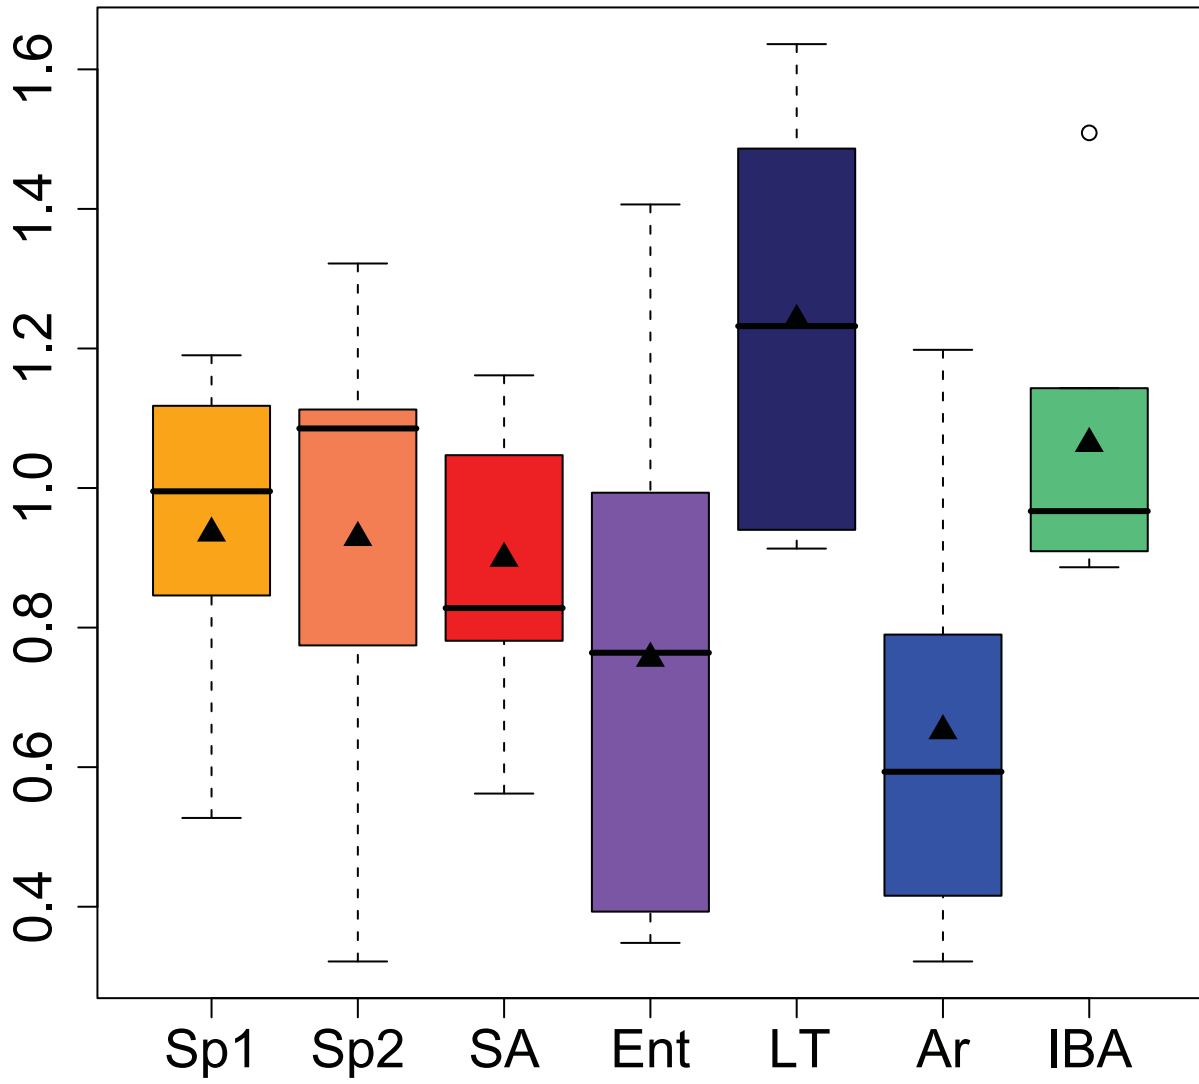

# xylitol

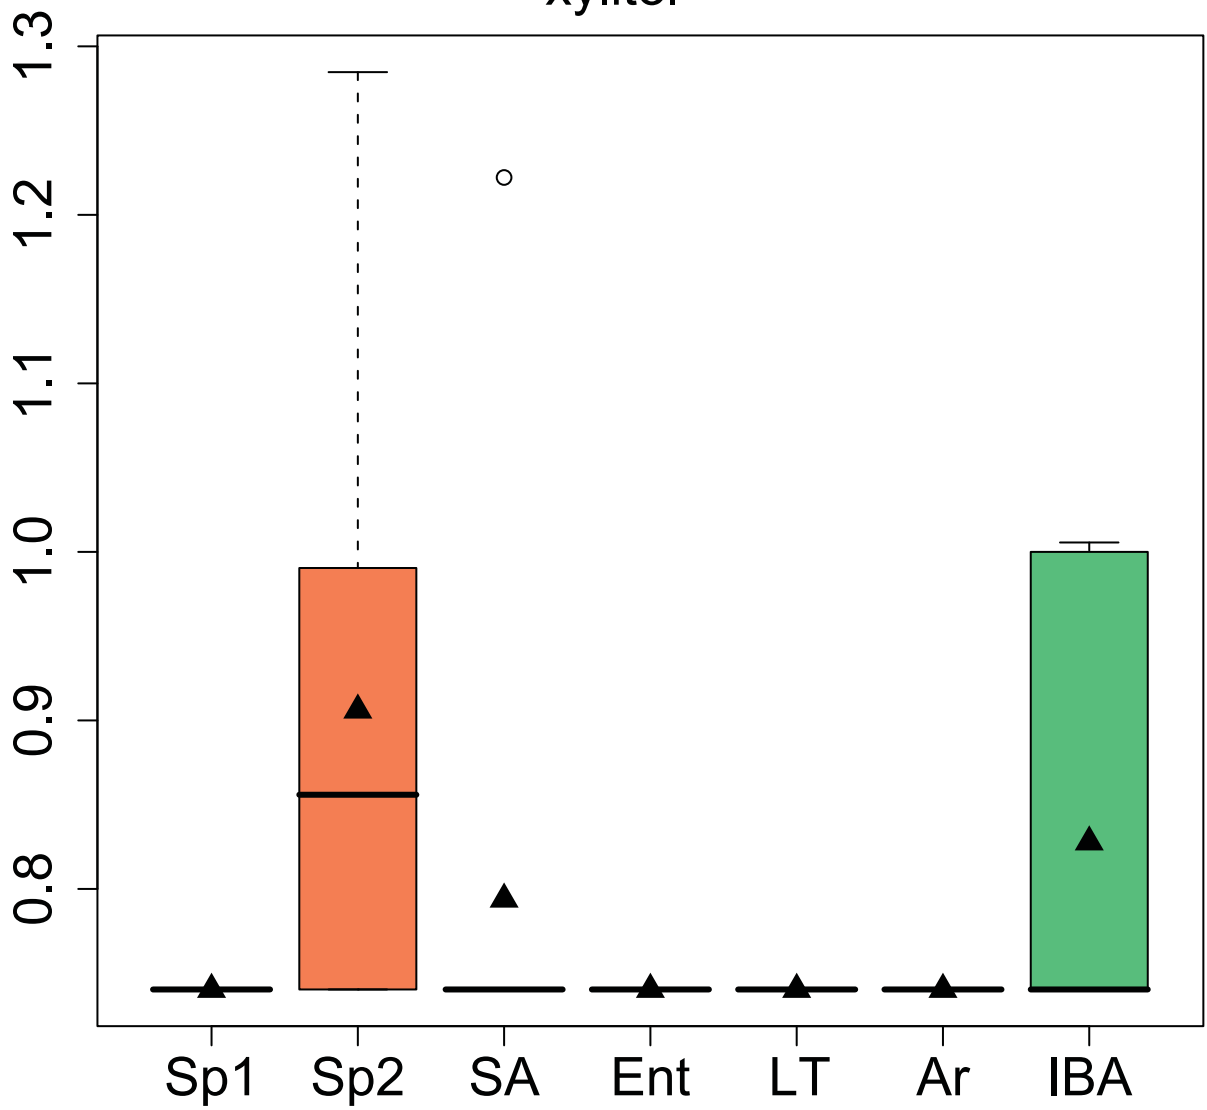

# ascorbate (Vitamin C)

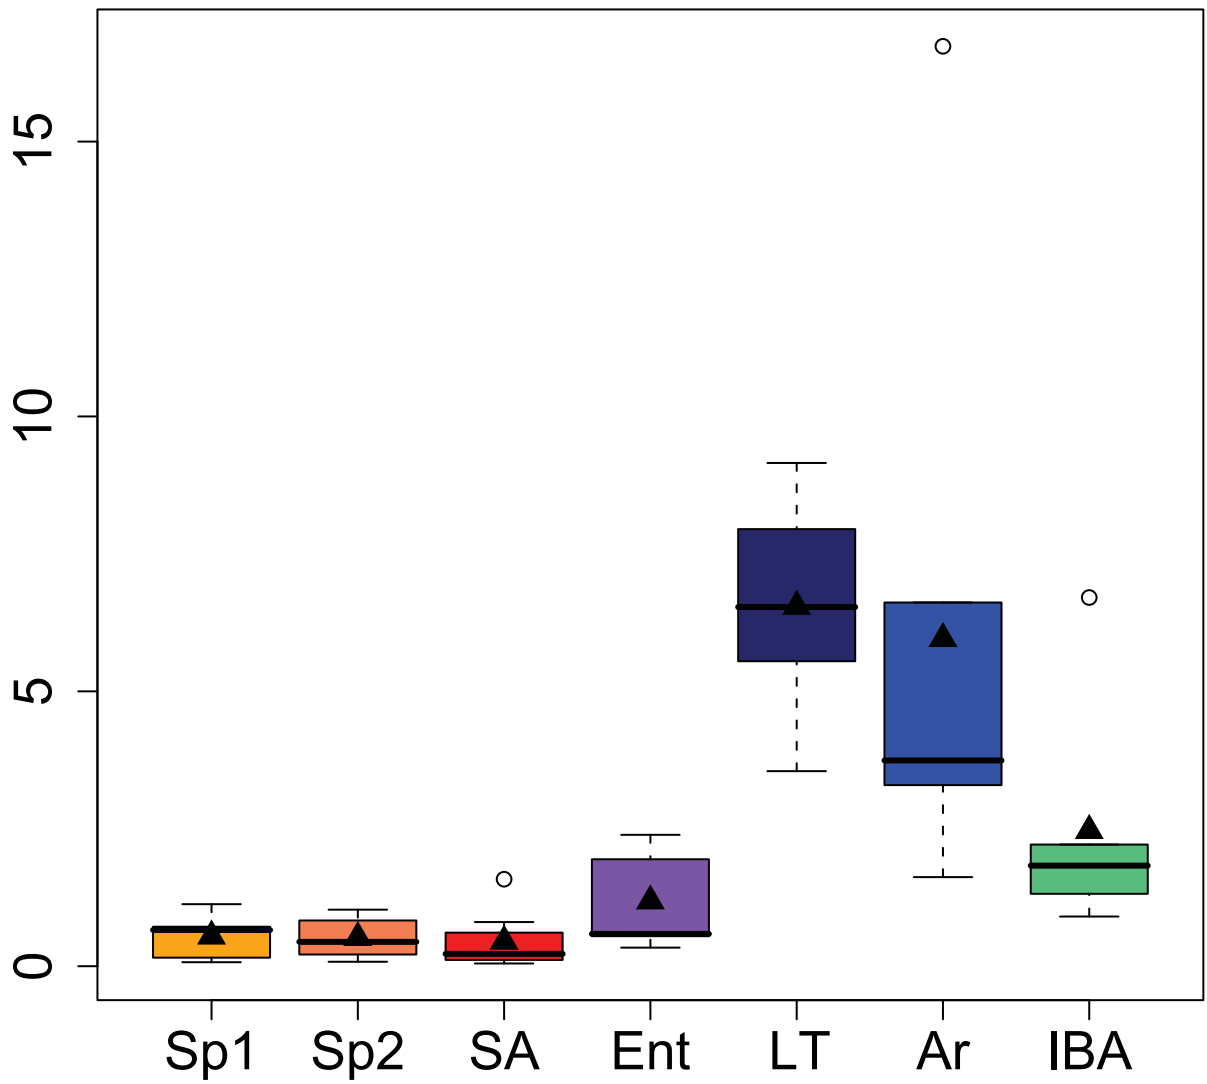

# threonate

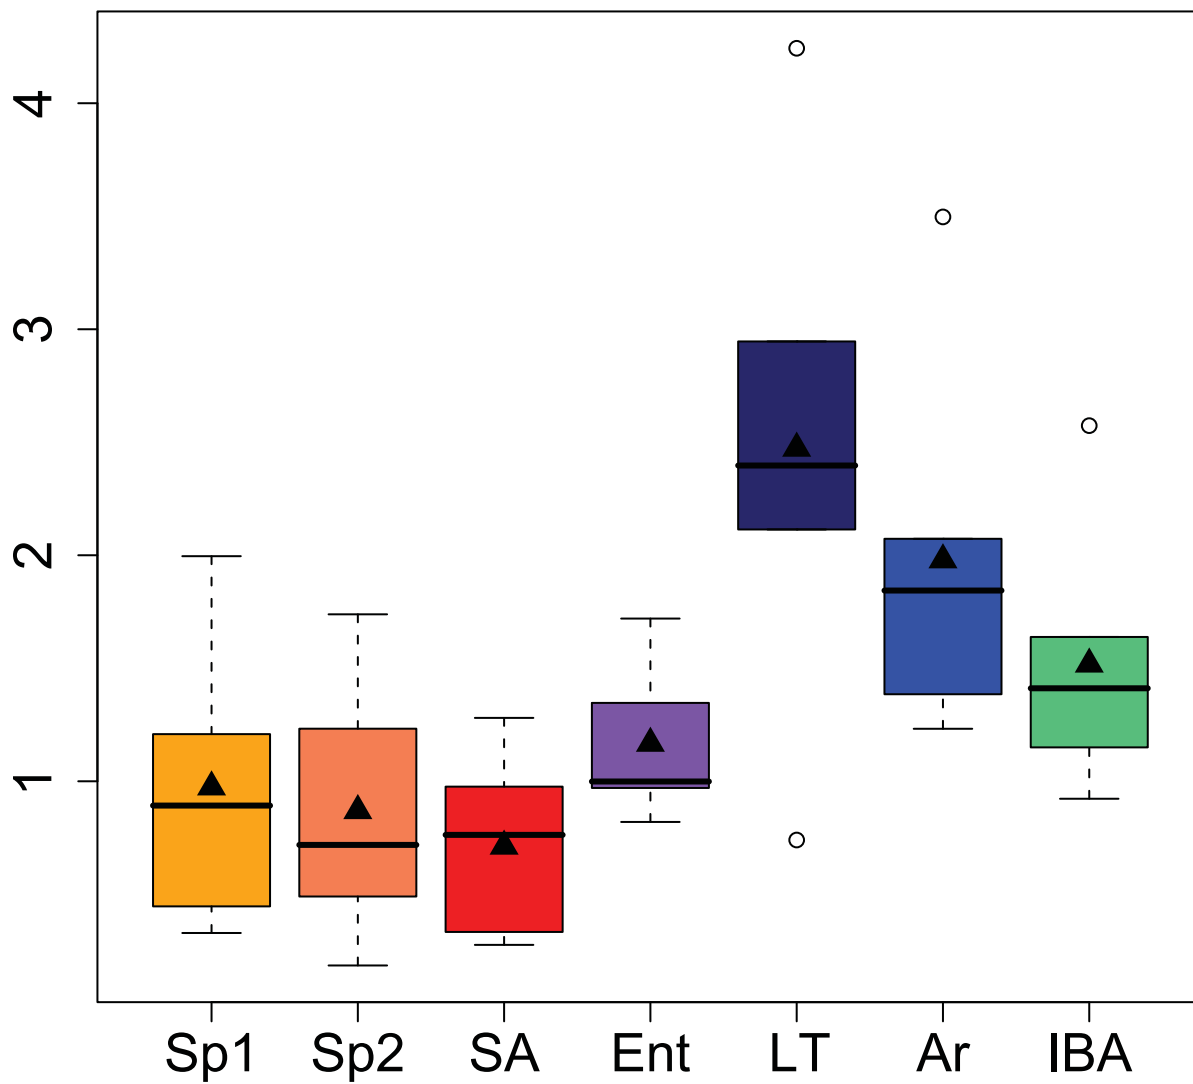

heme\*

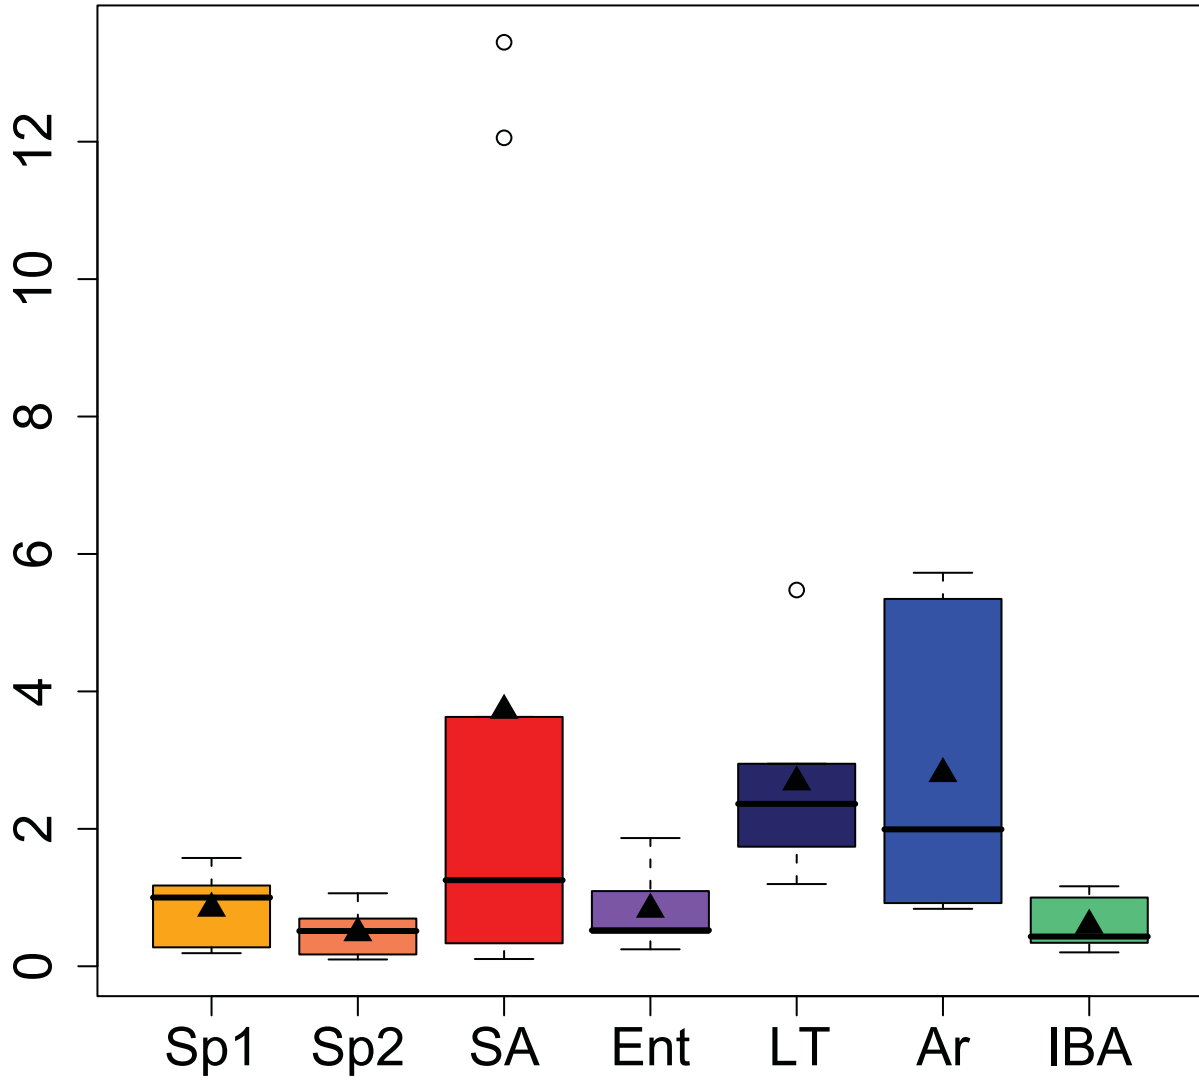



# bilirubin

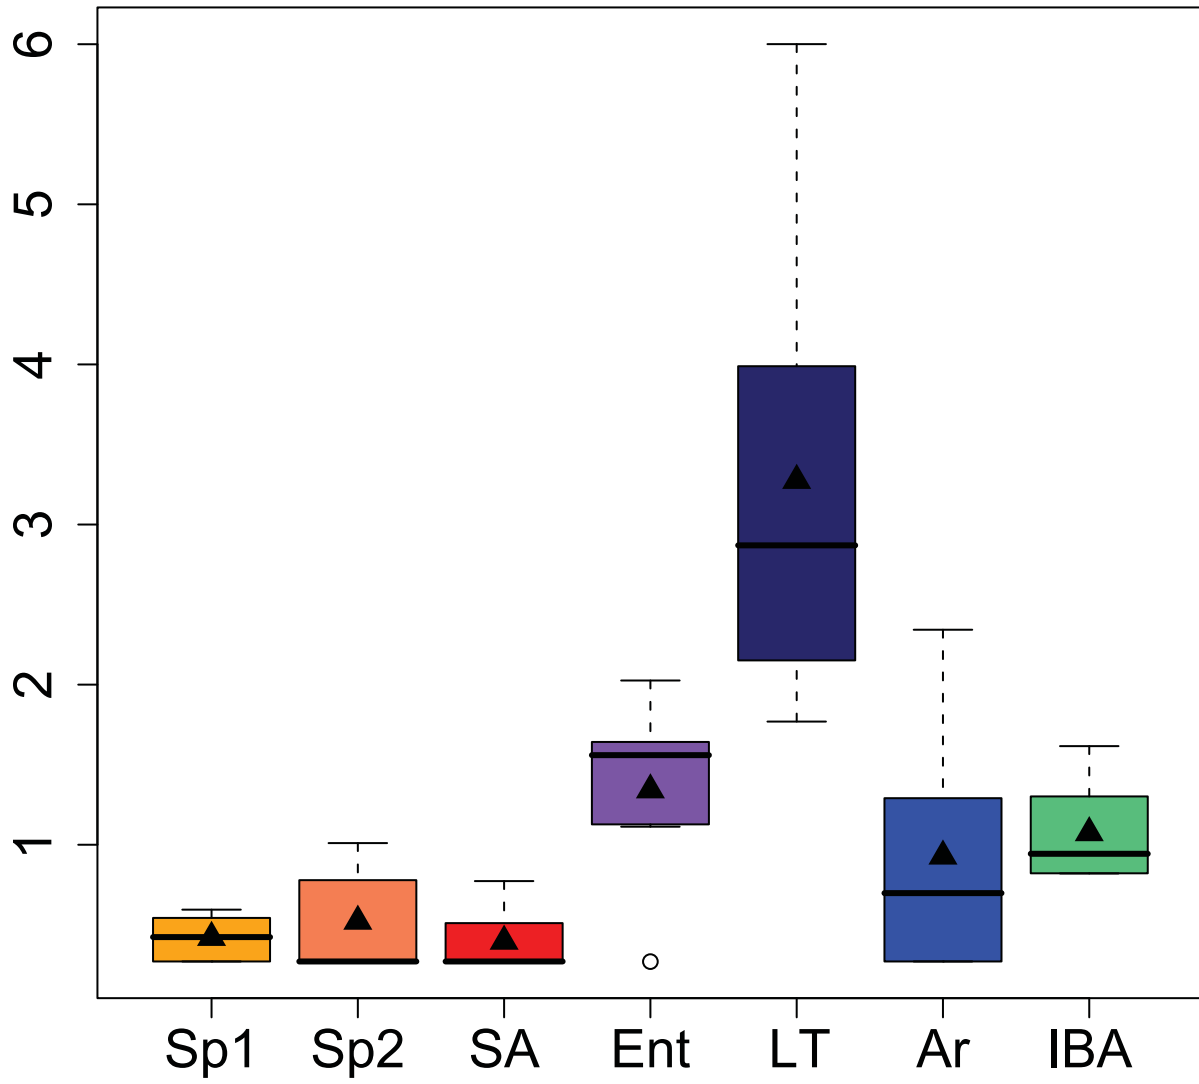

# biliverdin

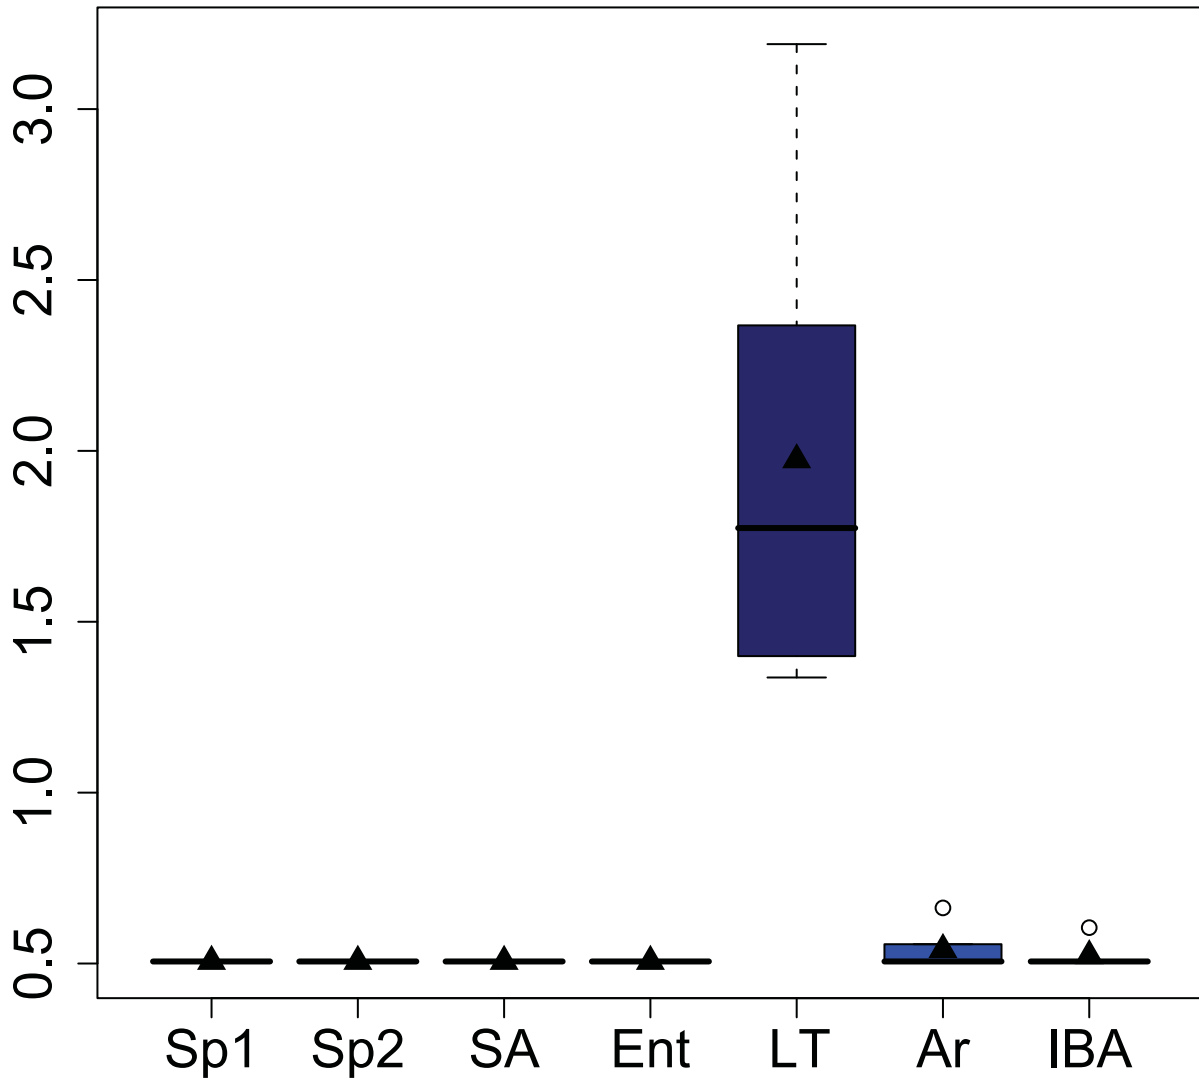

adenosine-5-diphosphoribose

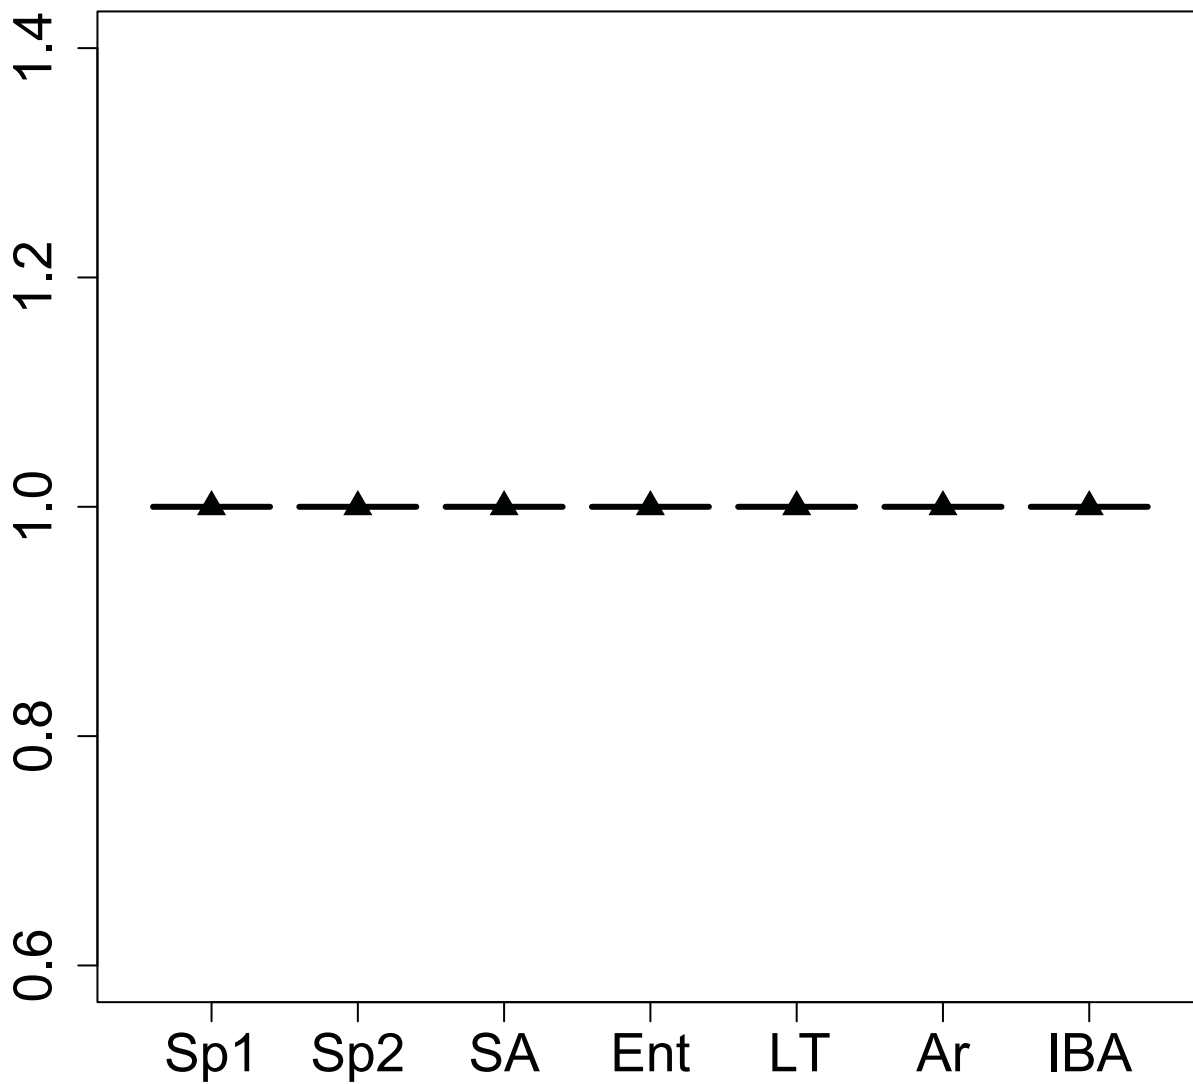

# nicotinamide

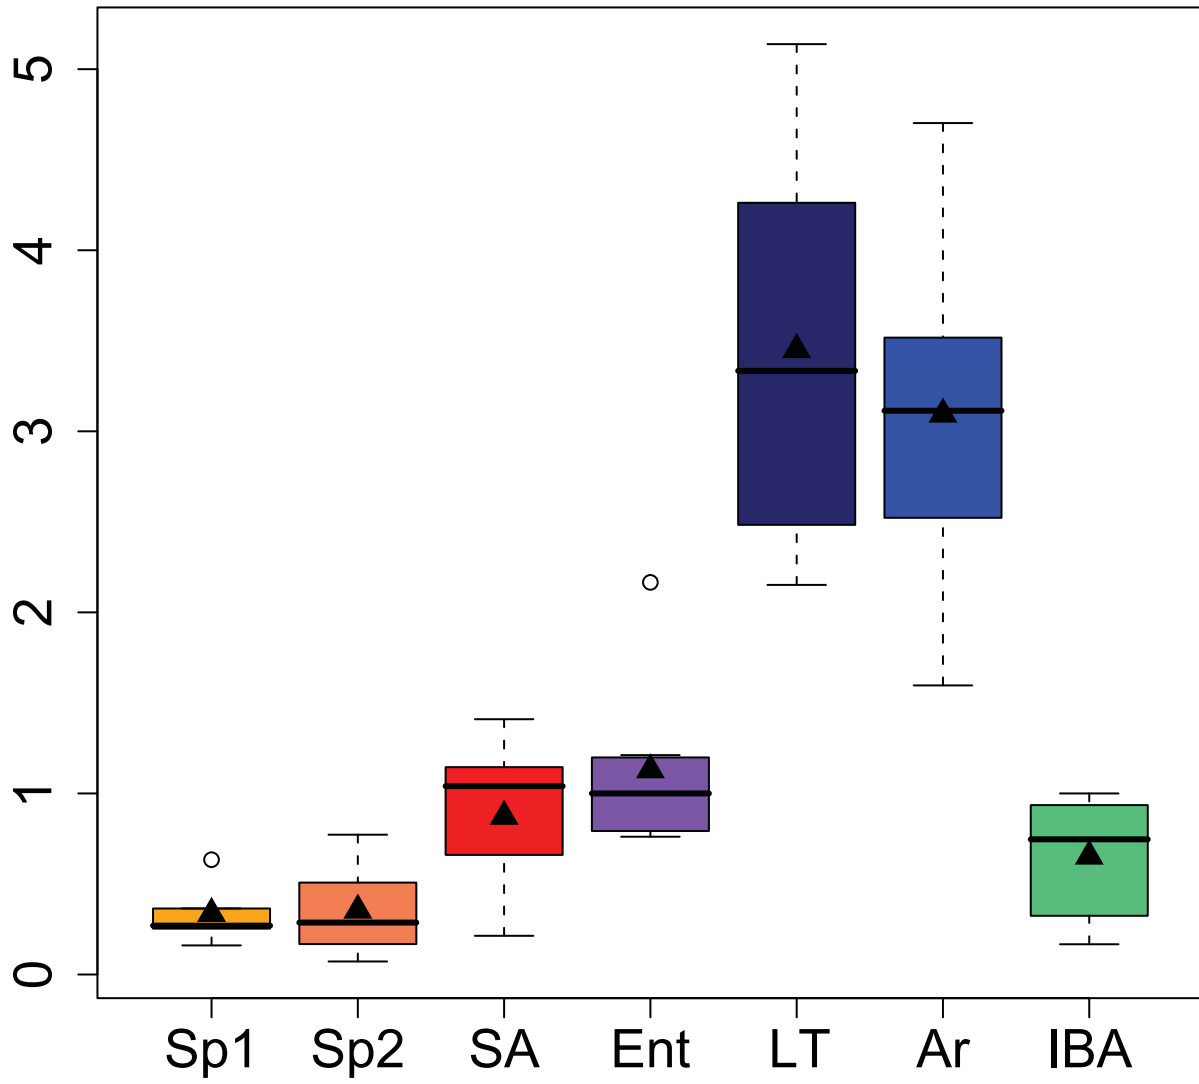

# trigonelline (N-methylnicotinate)

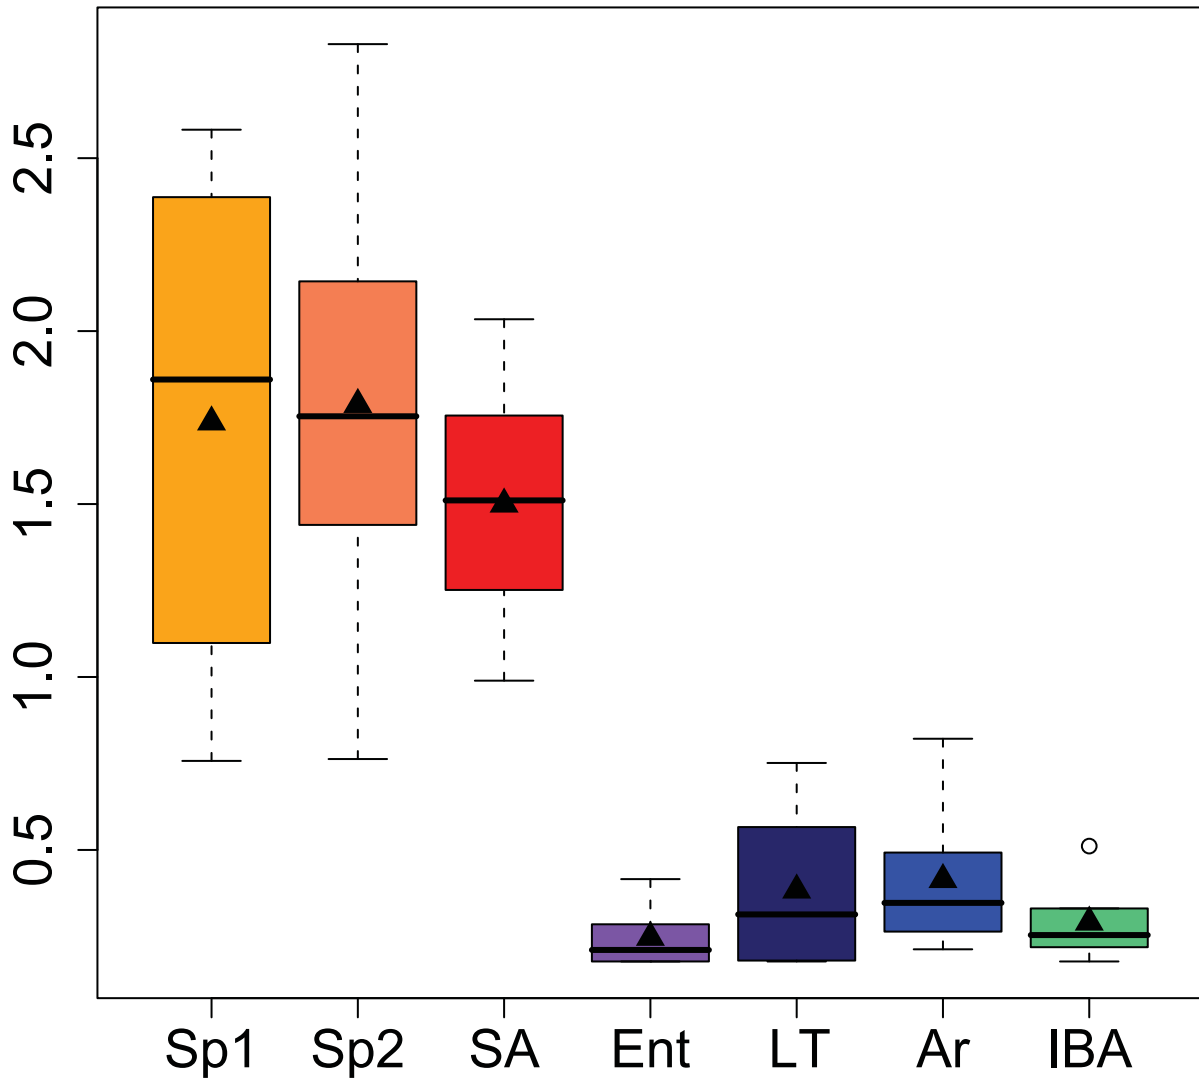

pantothenate

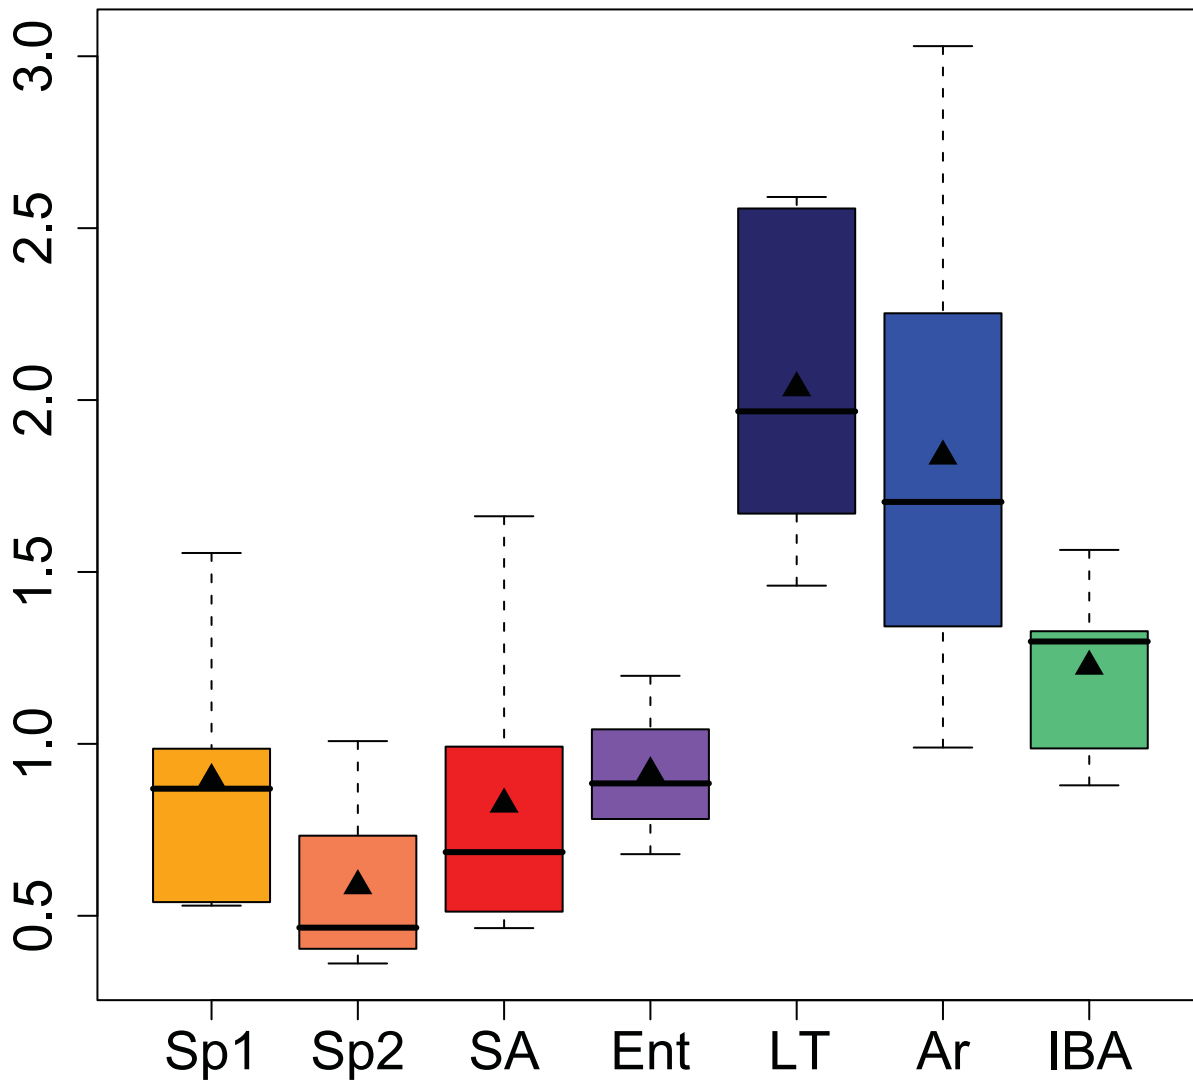

# riboflavin (Vitamin B2)

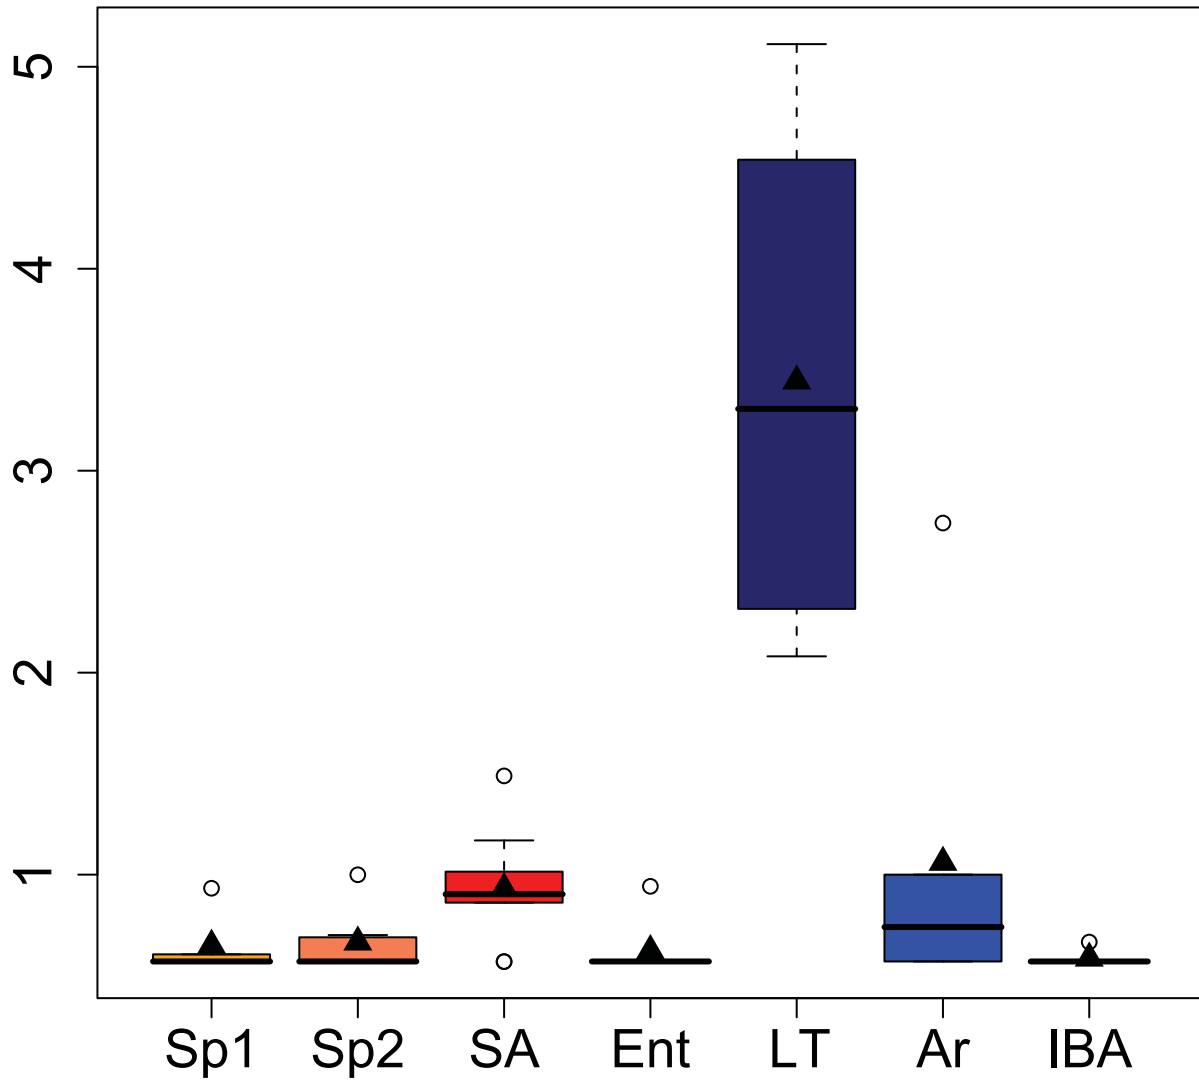

alpha-tocopherol

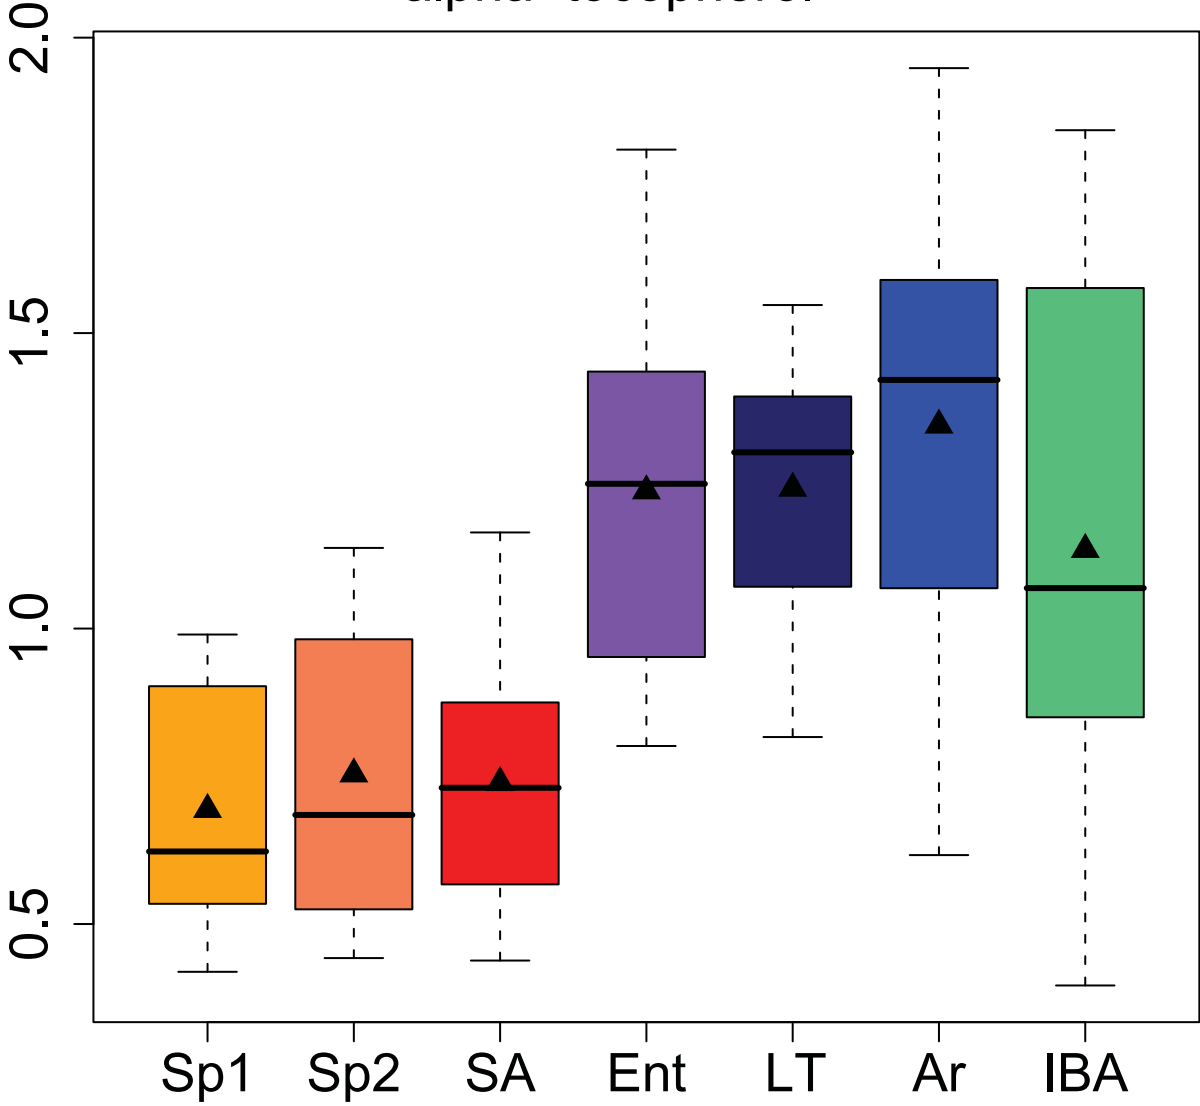



# beta-tocopherol

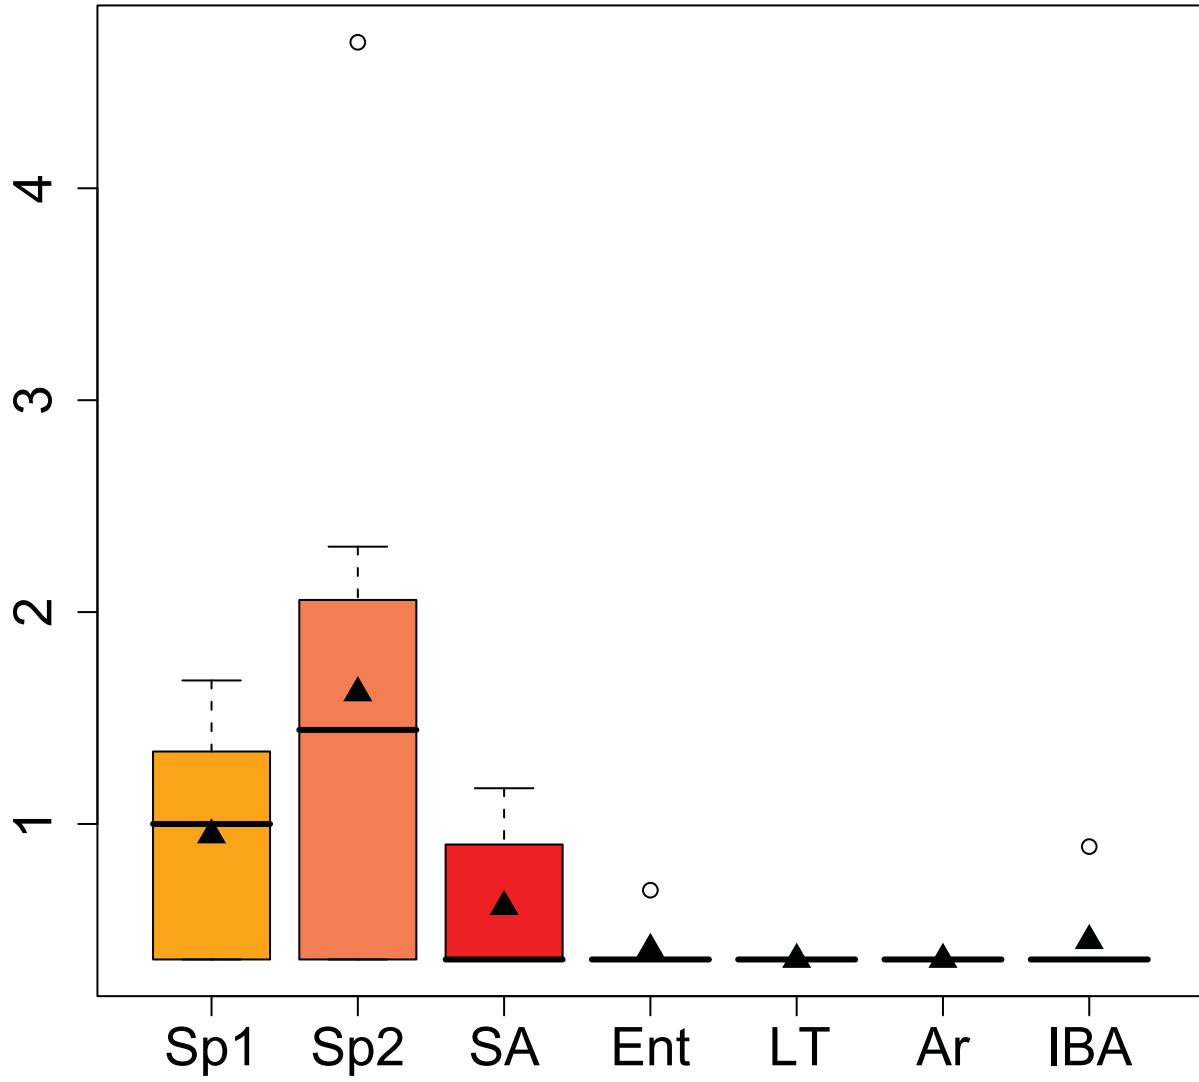

# pyridoxate

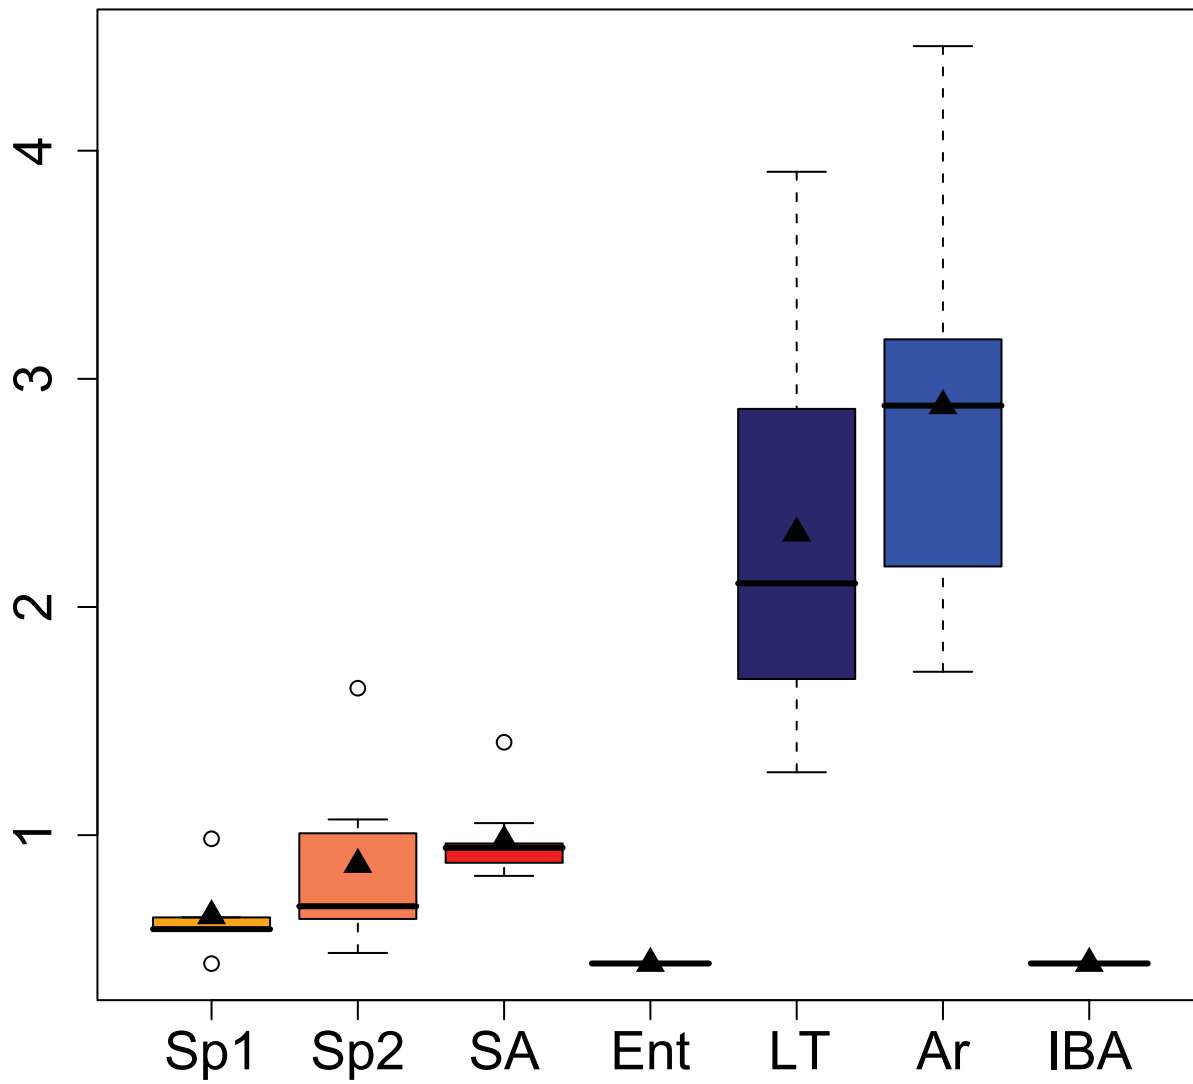

# alpha-ketoglutarate

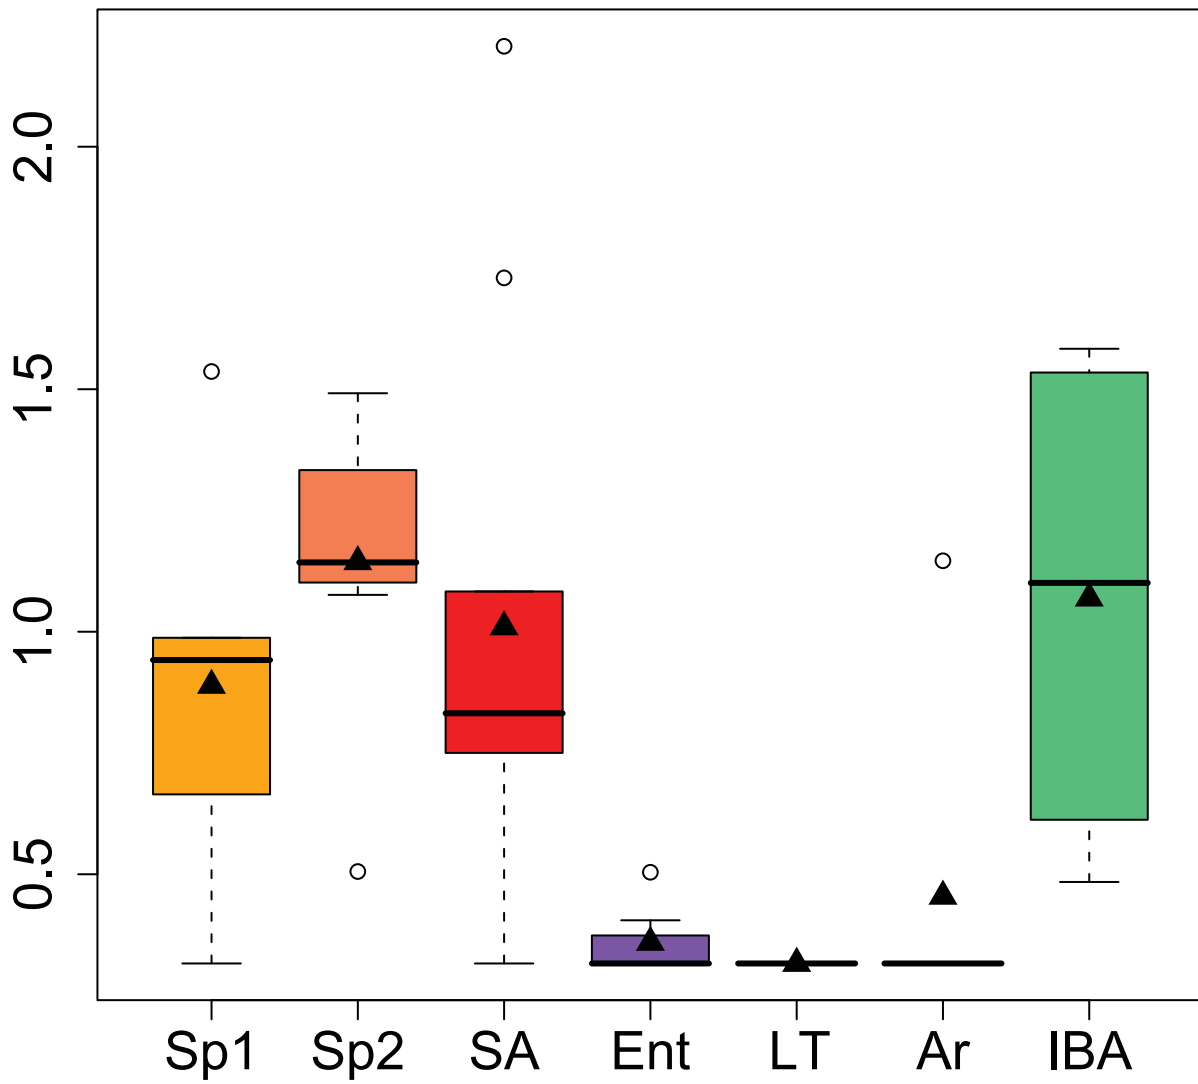

cis-aconitate

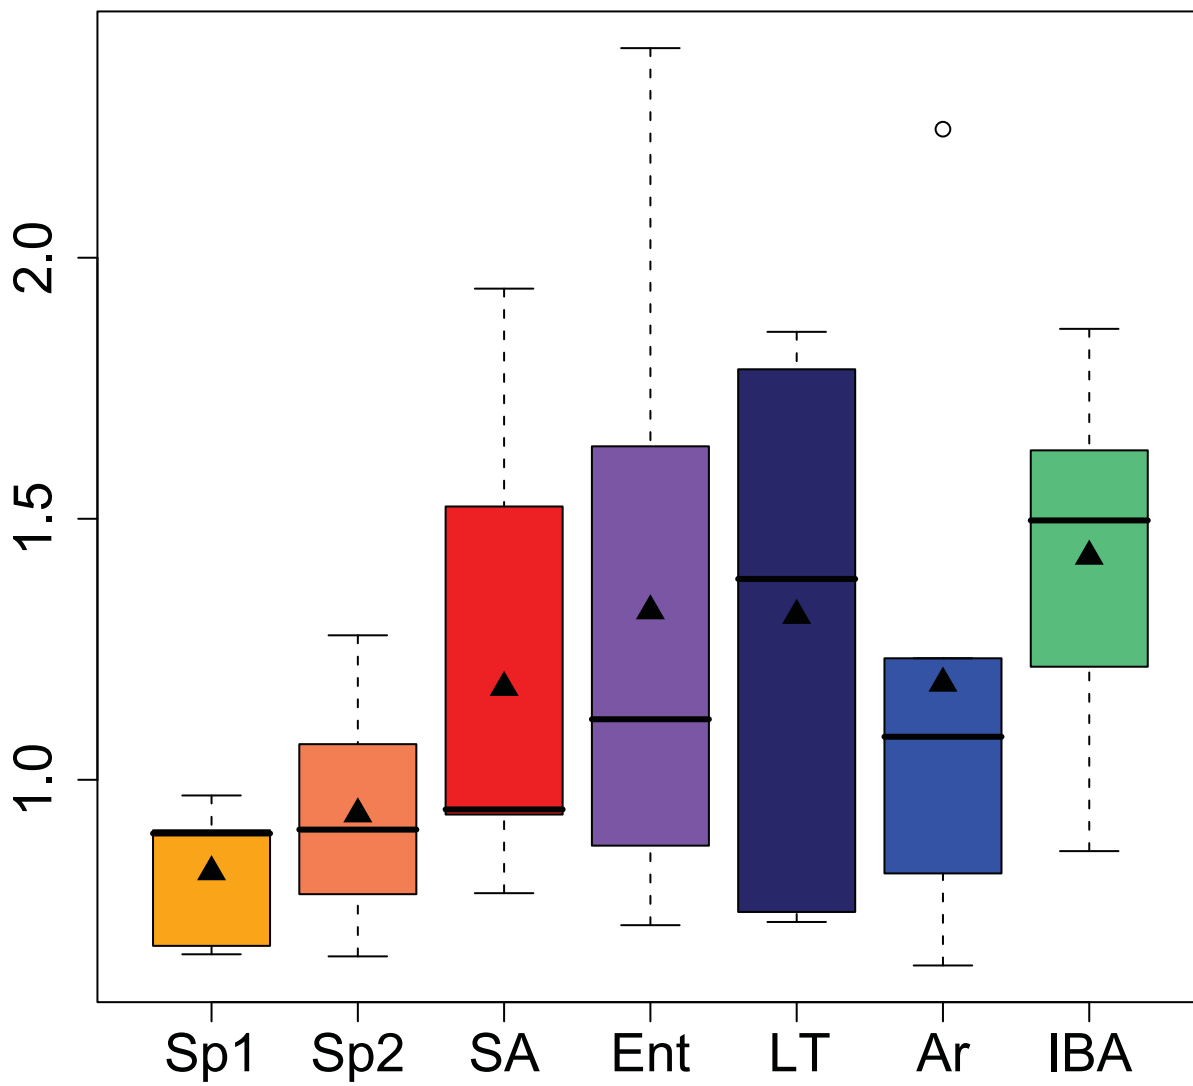

# citrate

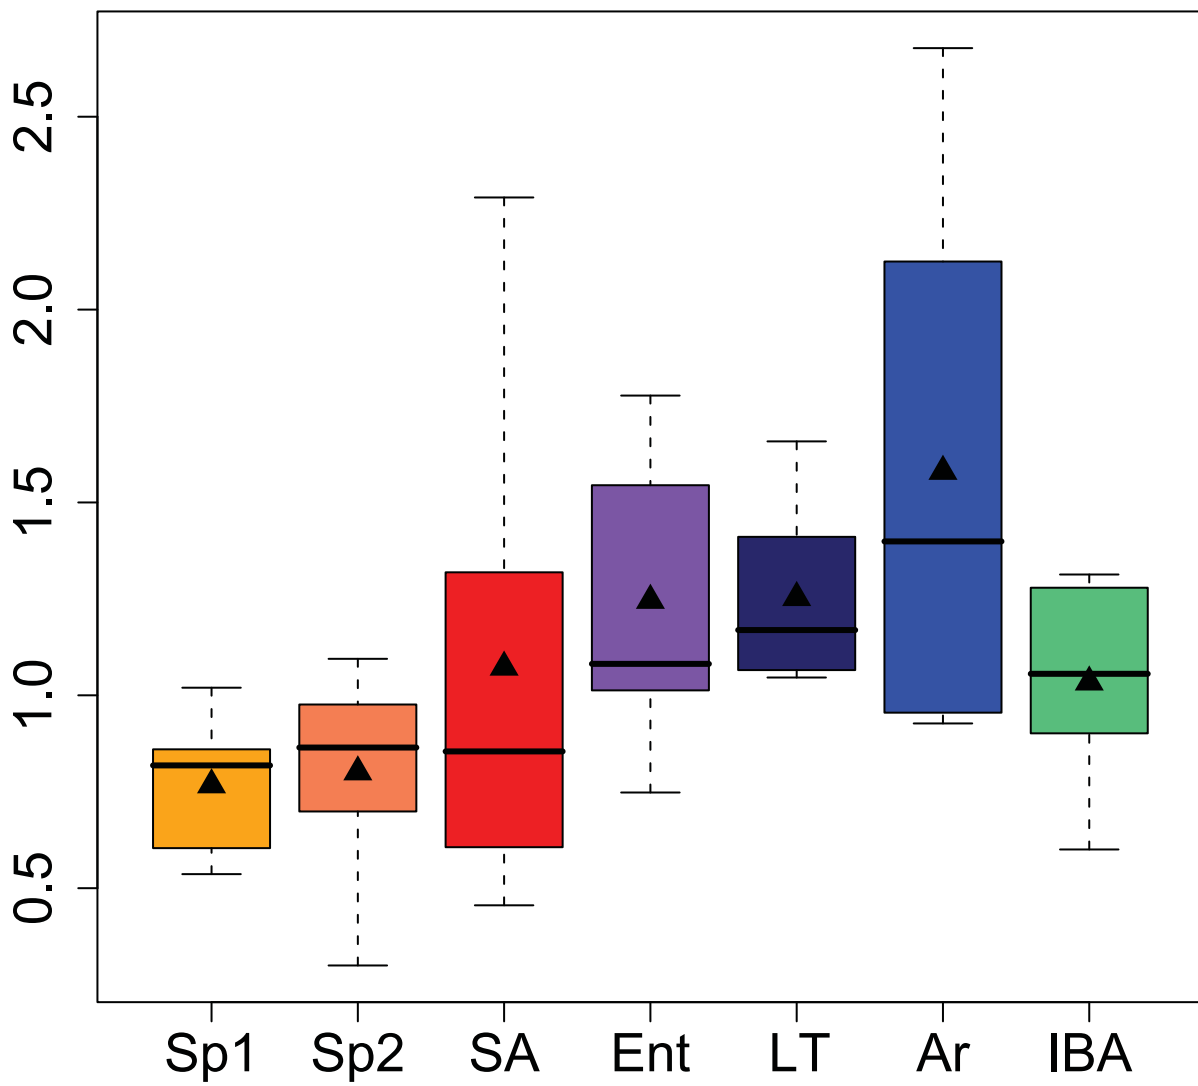

# fumarate

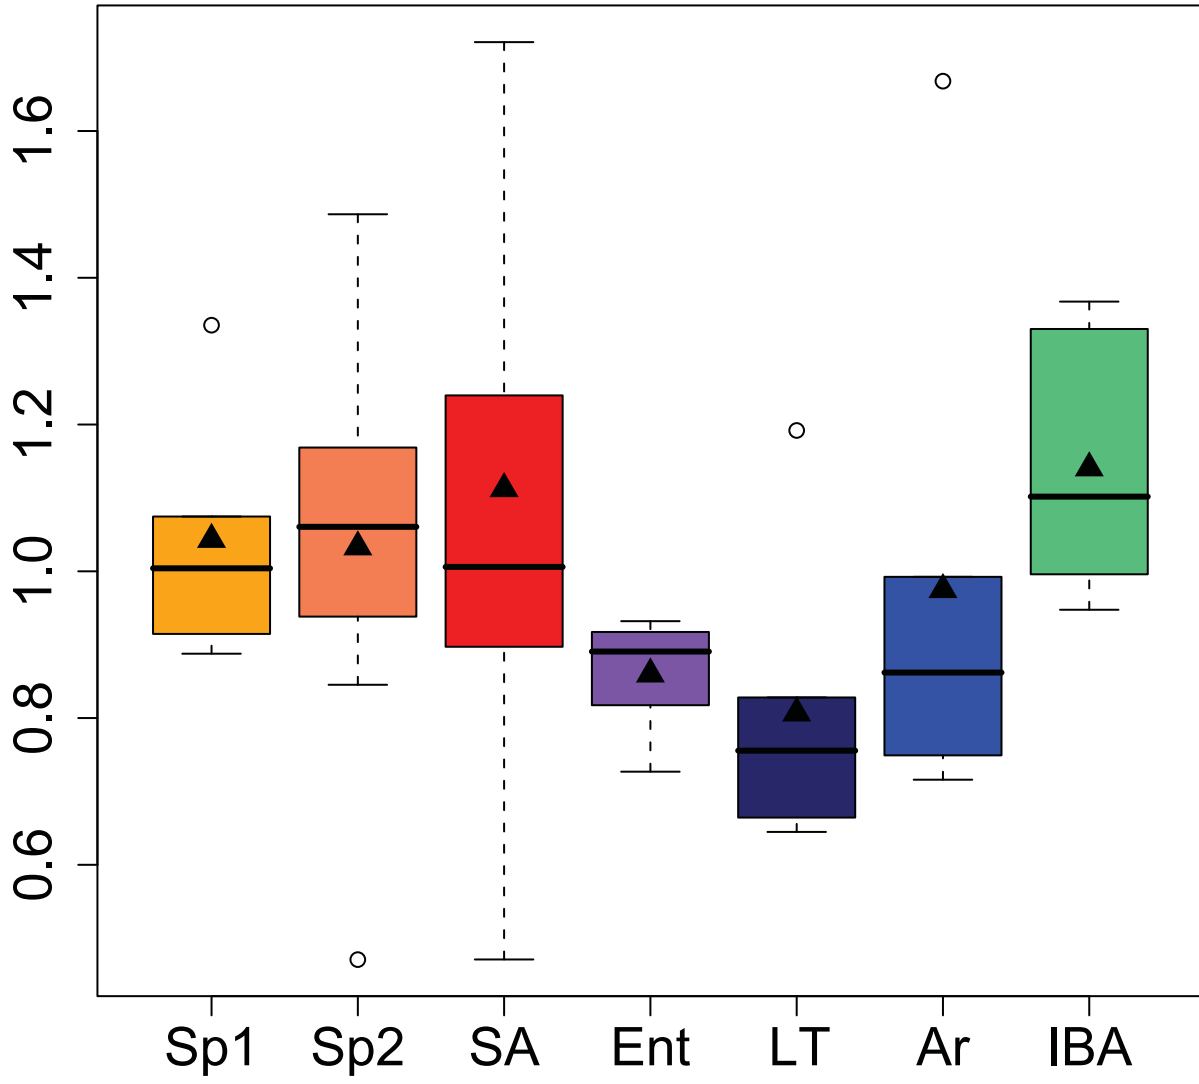

# malate

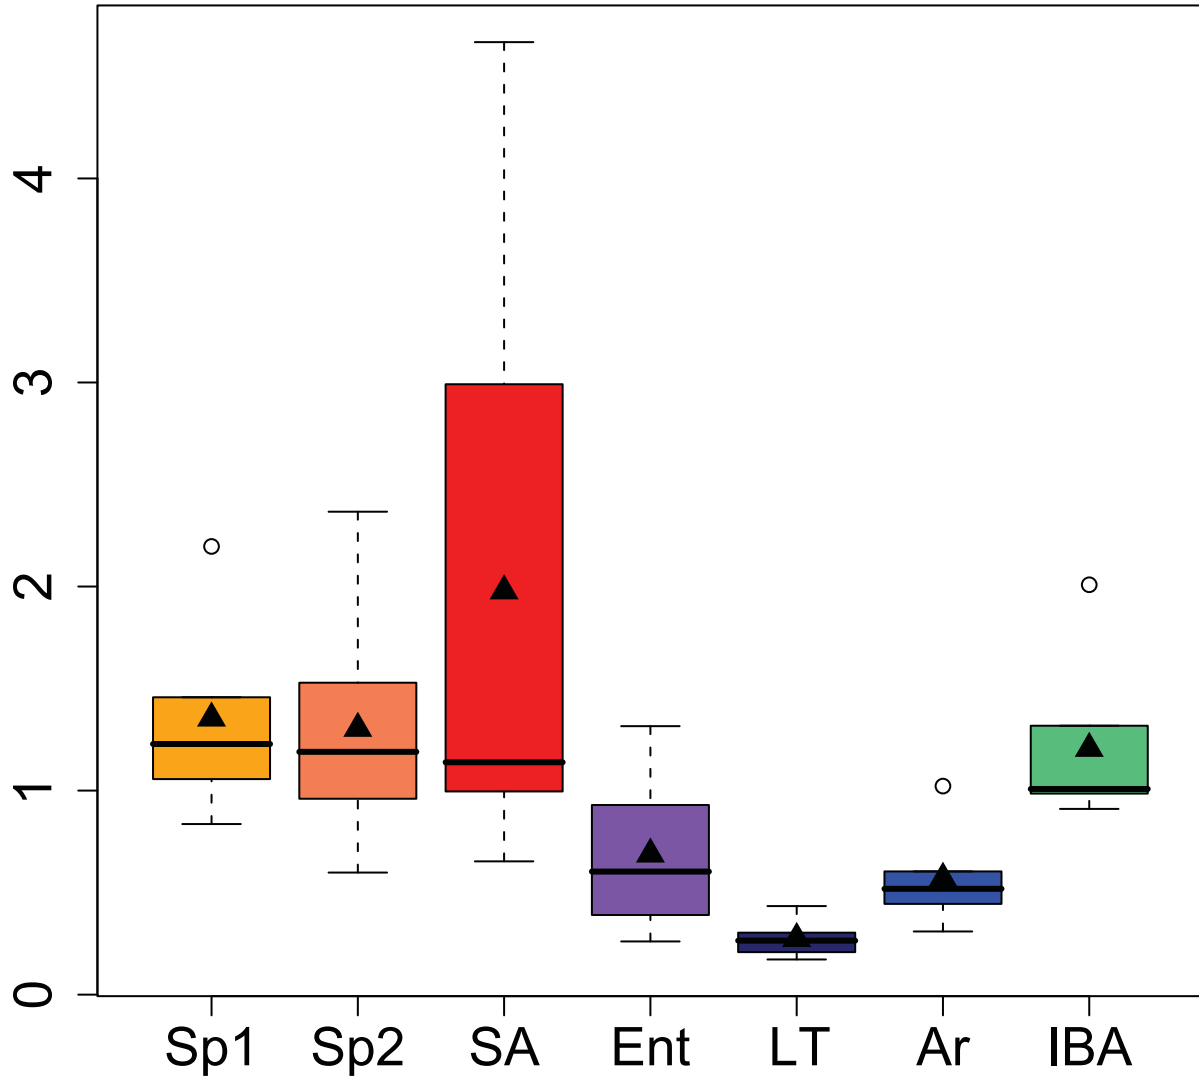

# oxaloacetate

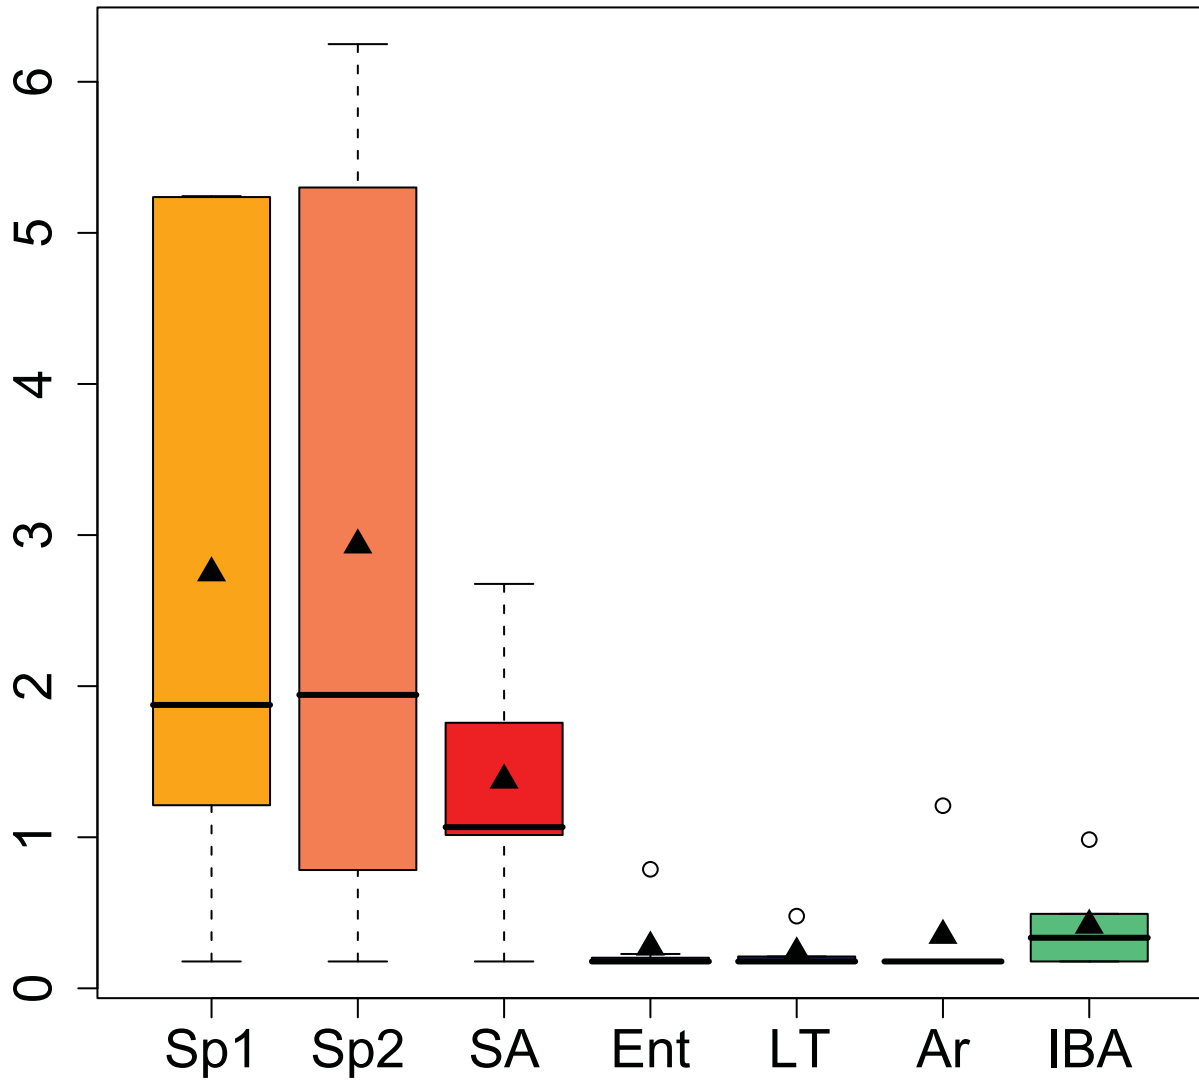



# succinate

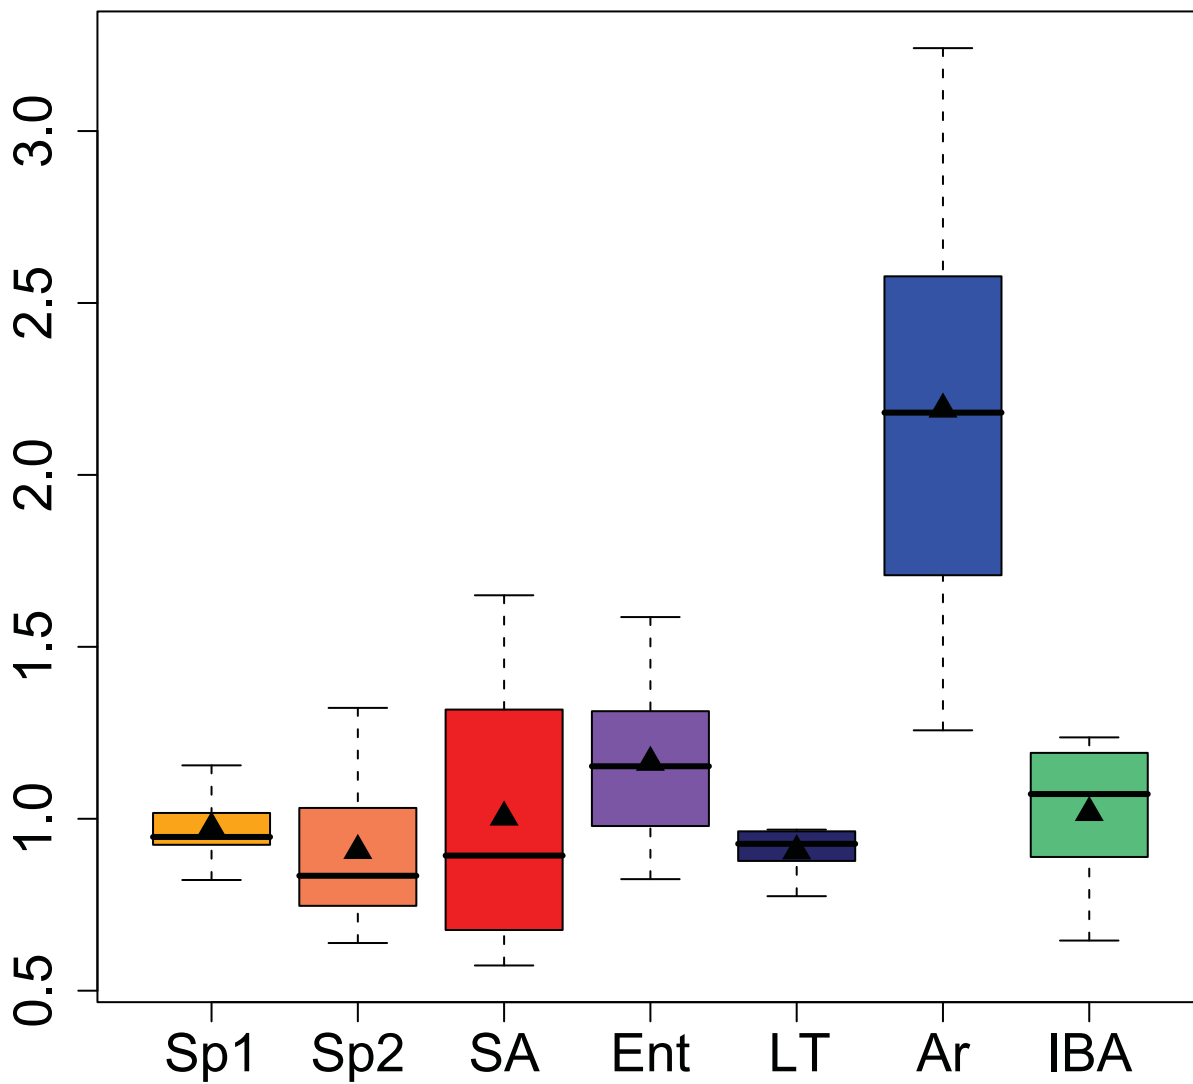

# phosphate

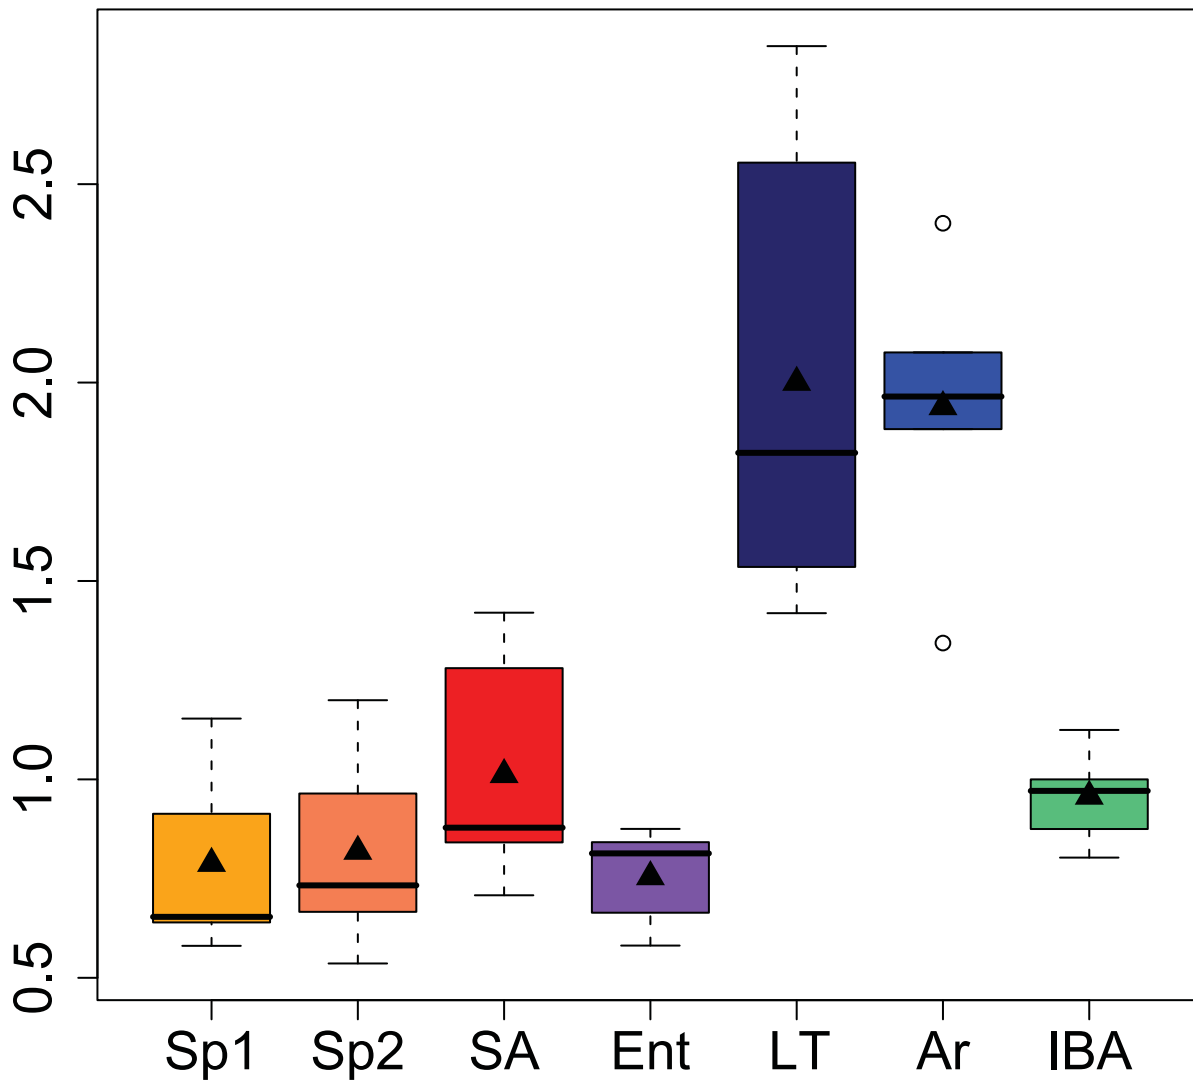

# cholate

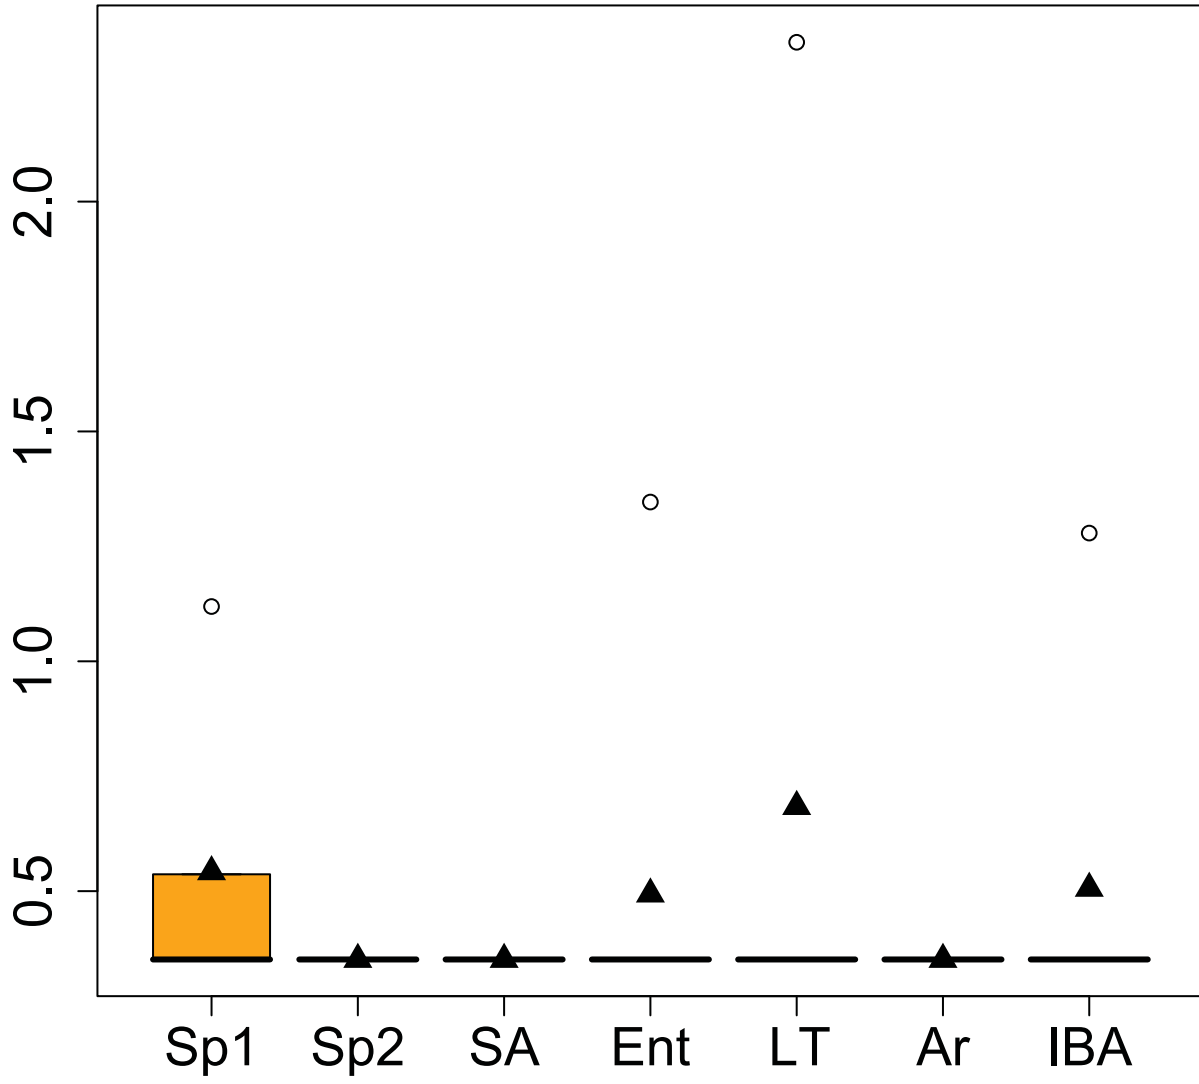

# deoxycholate

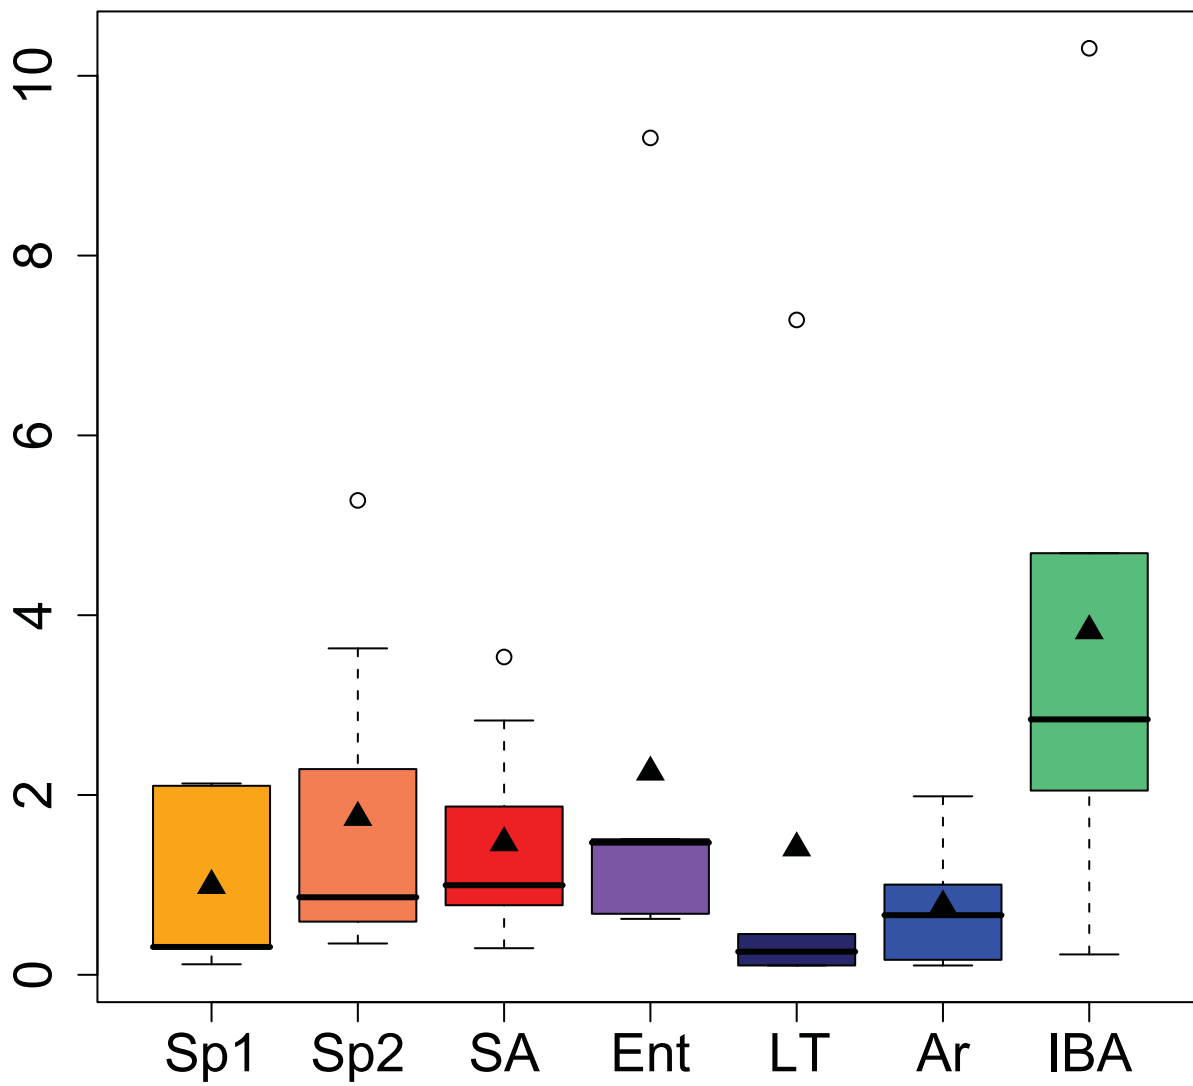

# taurochenodeoxycholate

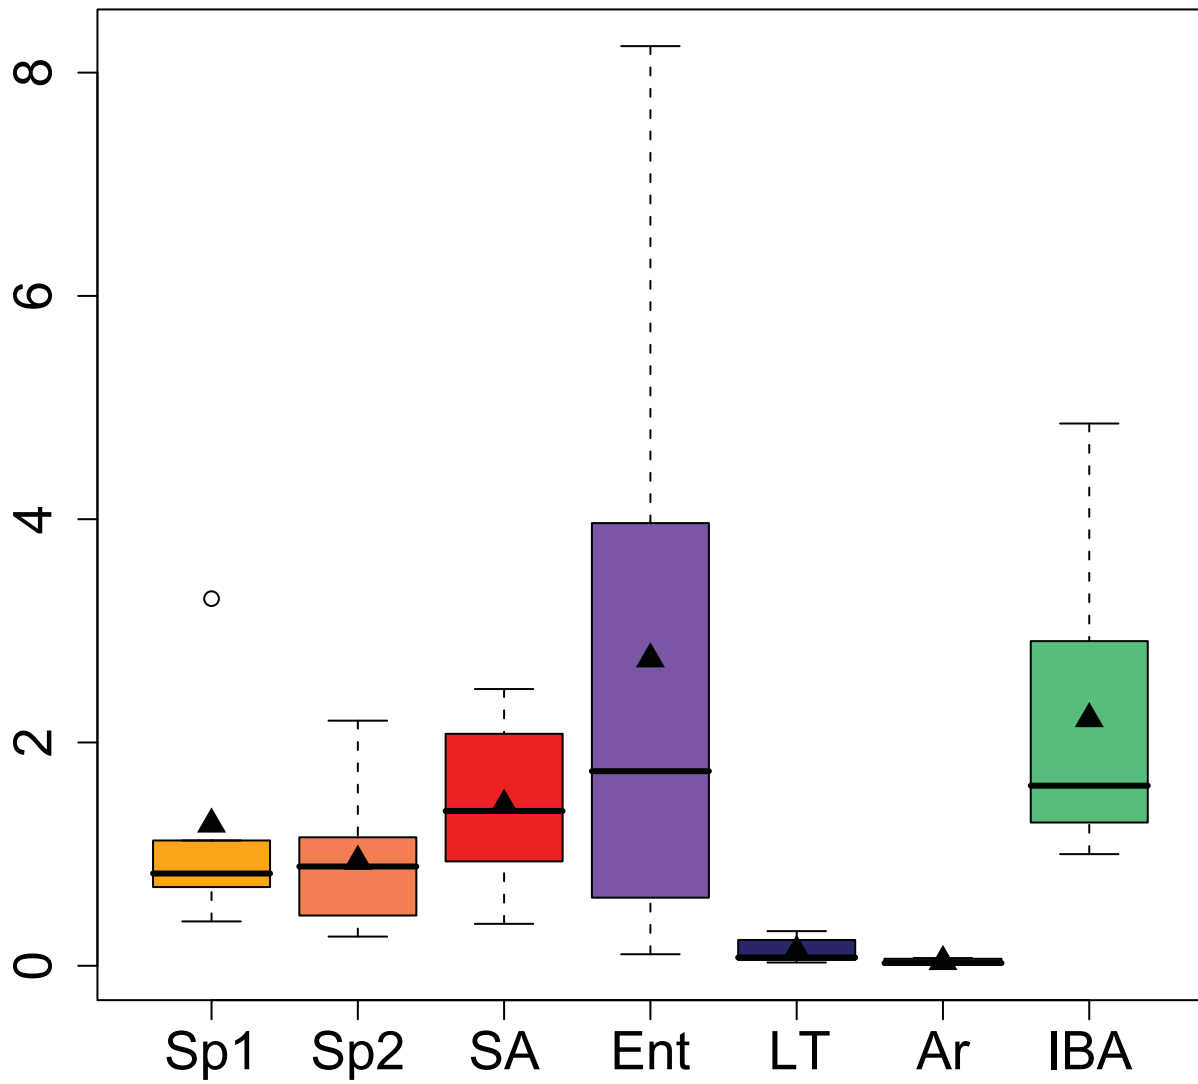

# taurocholate

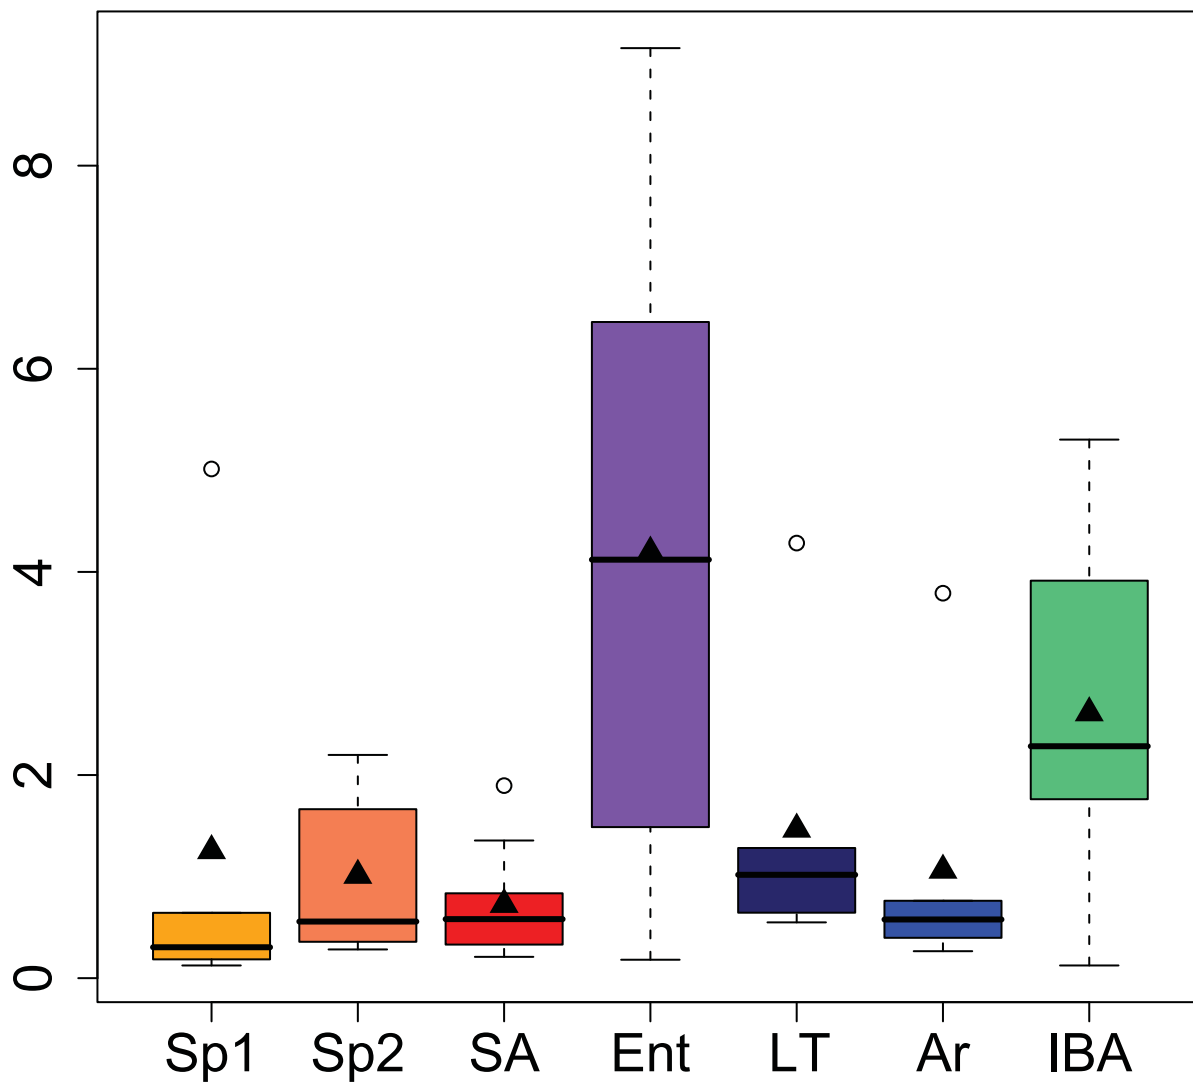

# acetylcarnitine

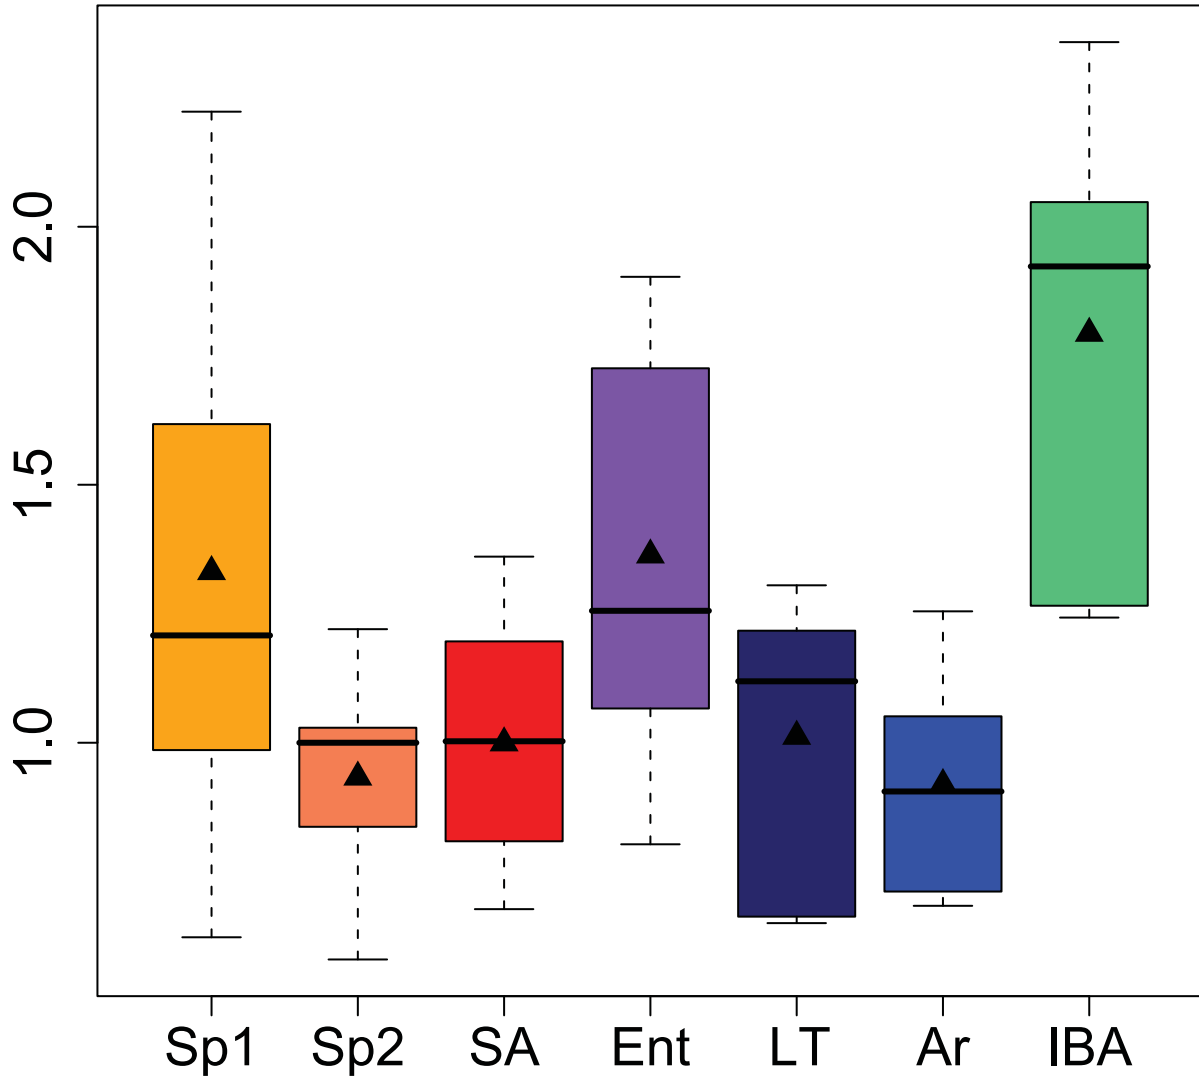

# butyrylcarnitine

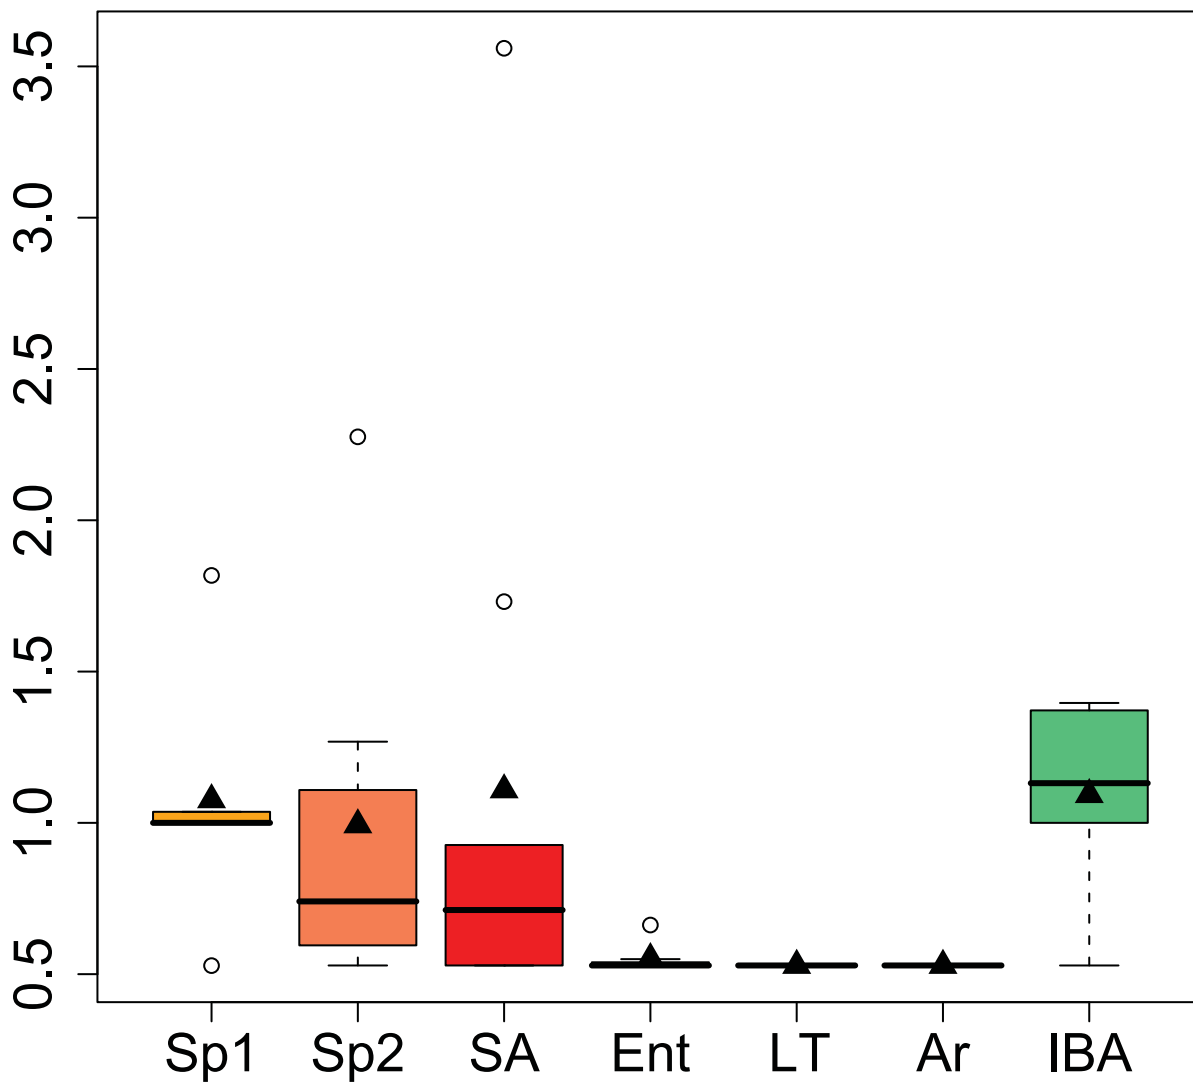



# carnitine

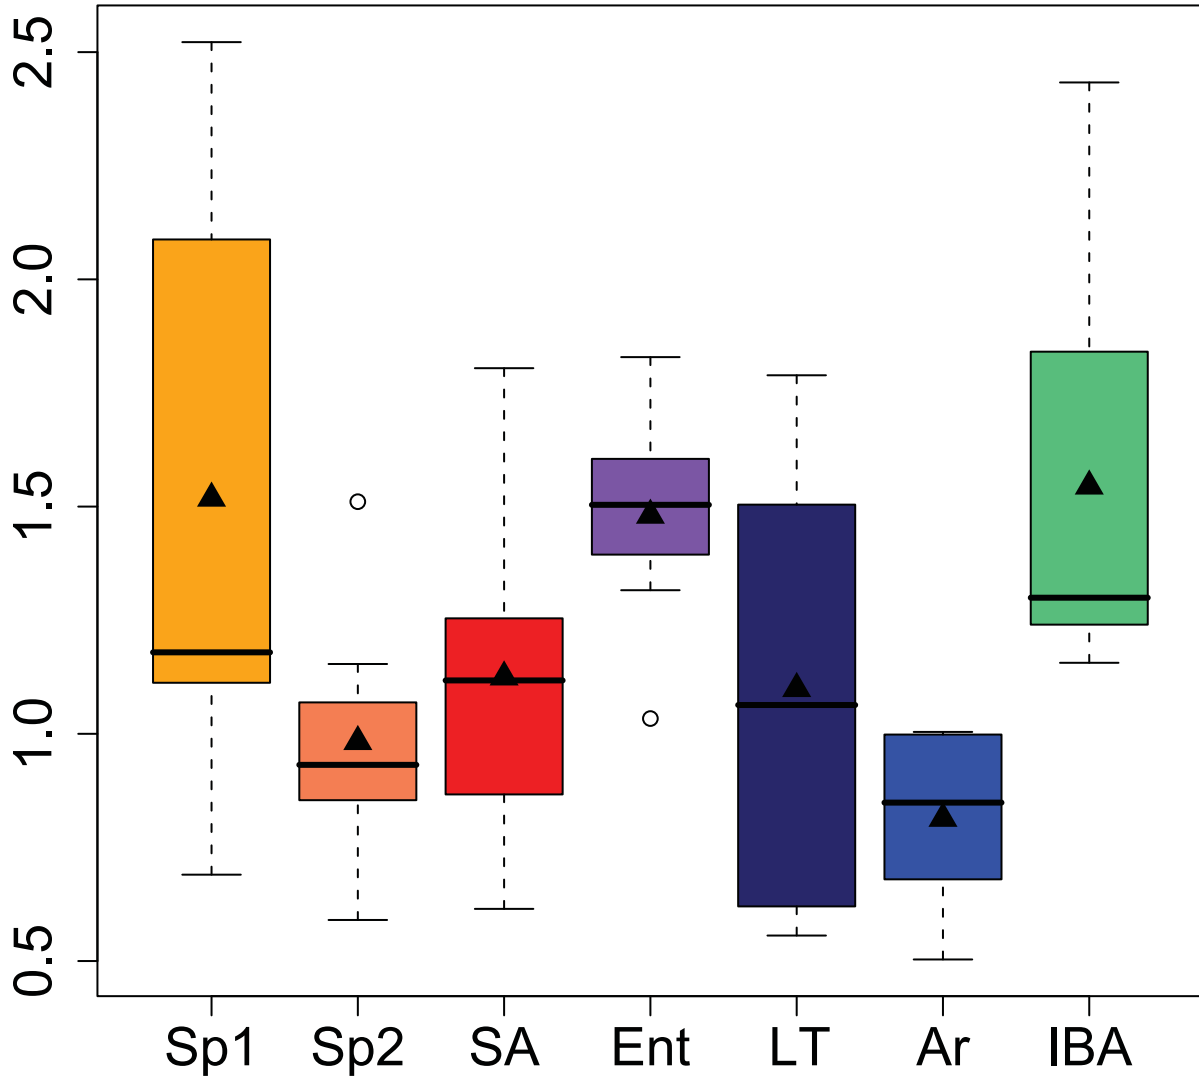

# isobutyrylcarnitine

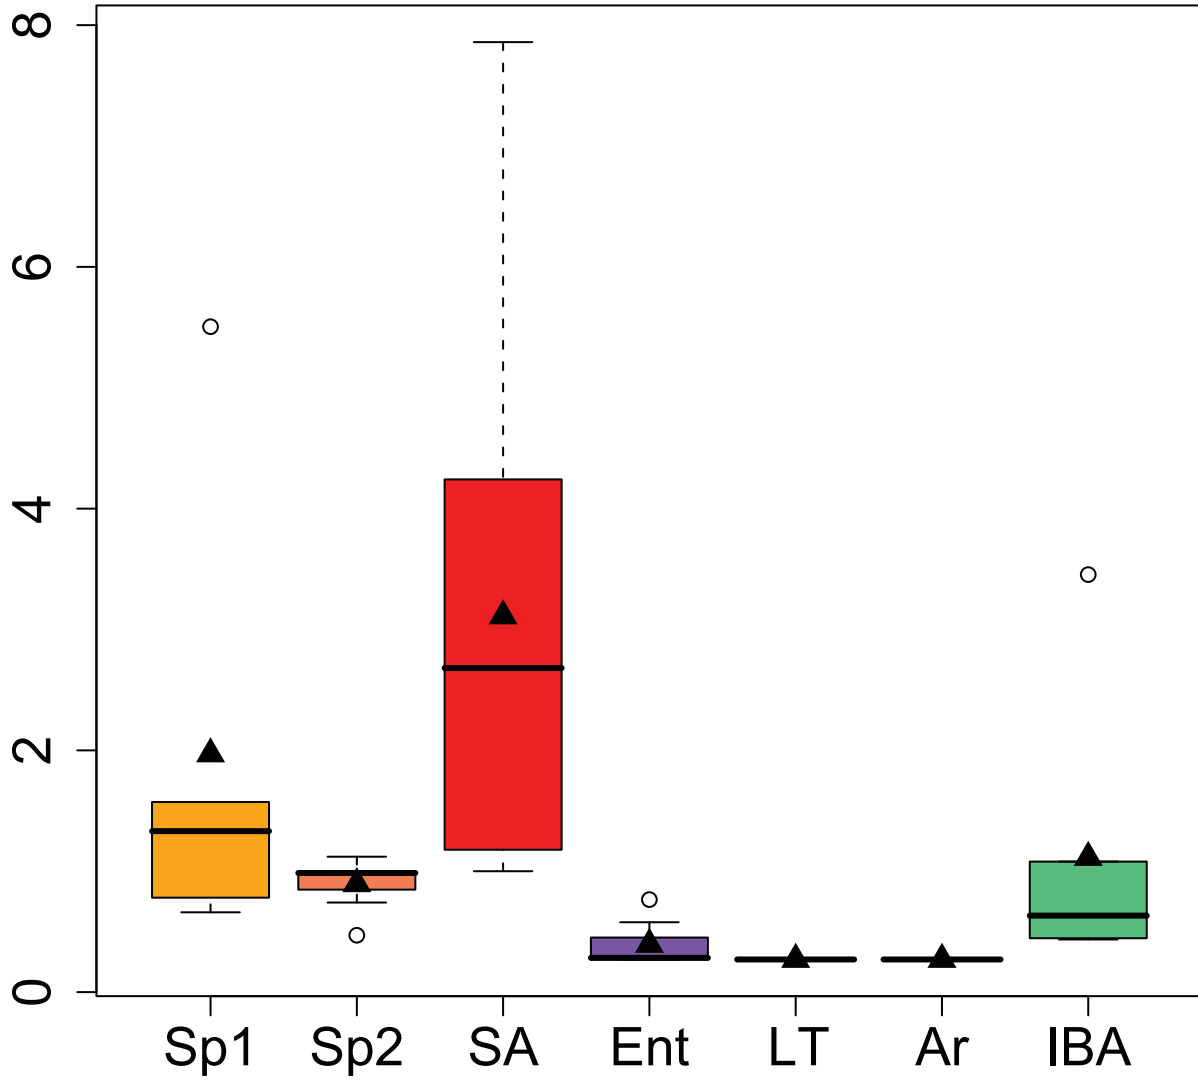

# isovalerylcarnitine

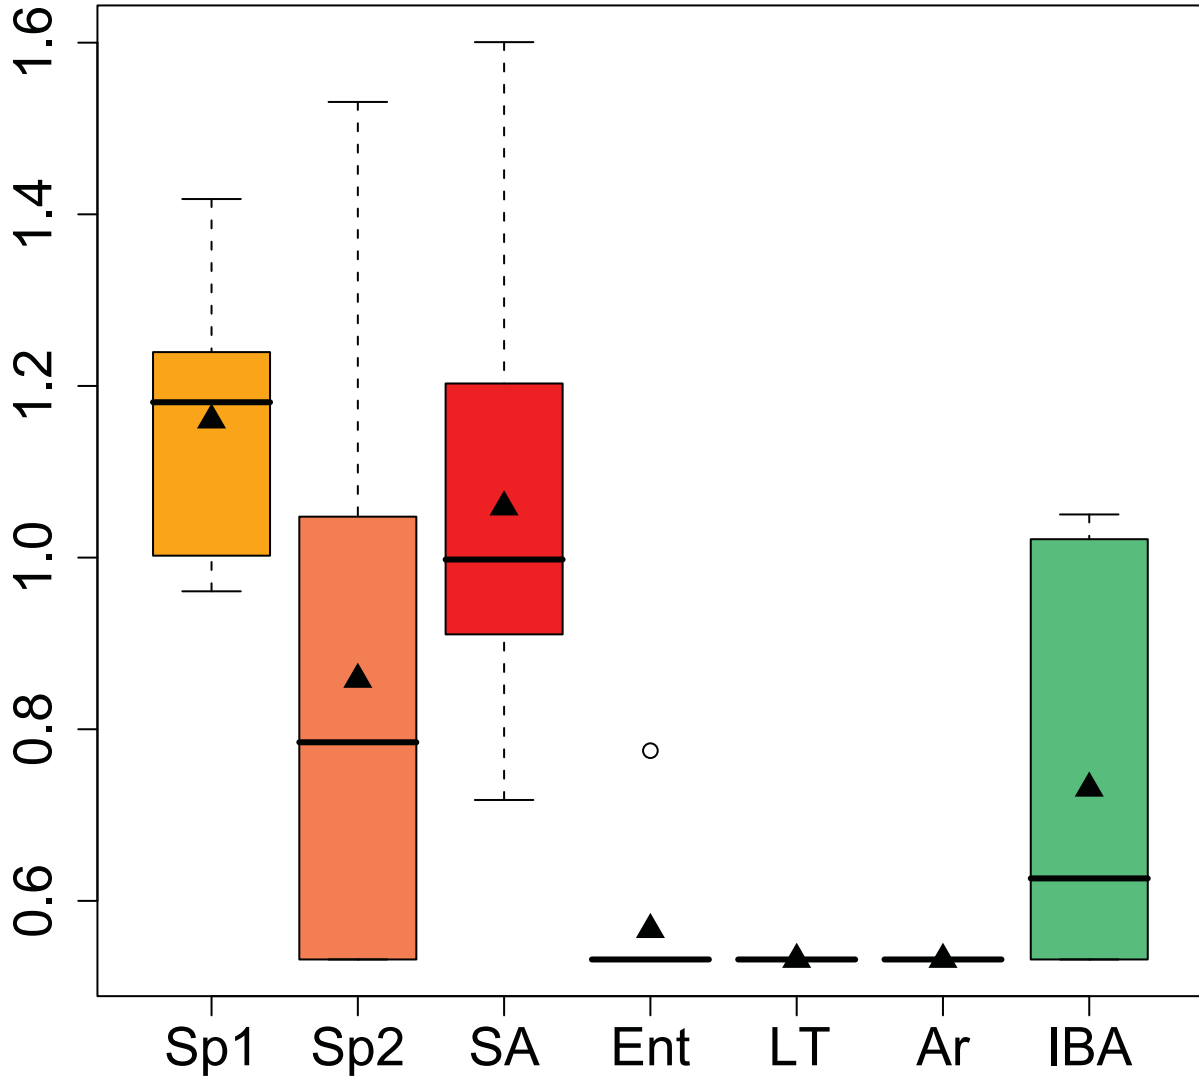

# oleoylcarnitine

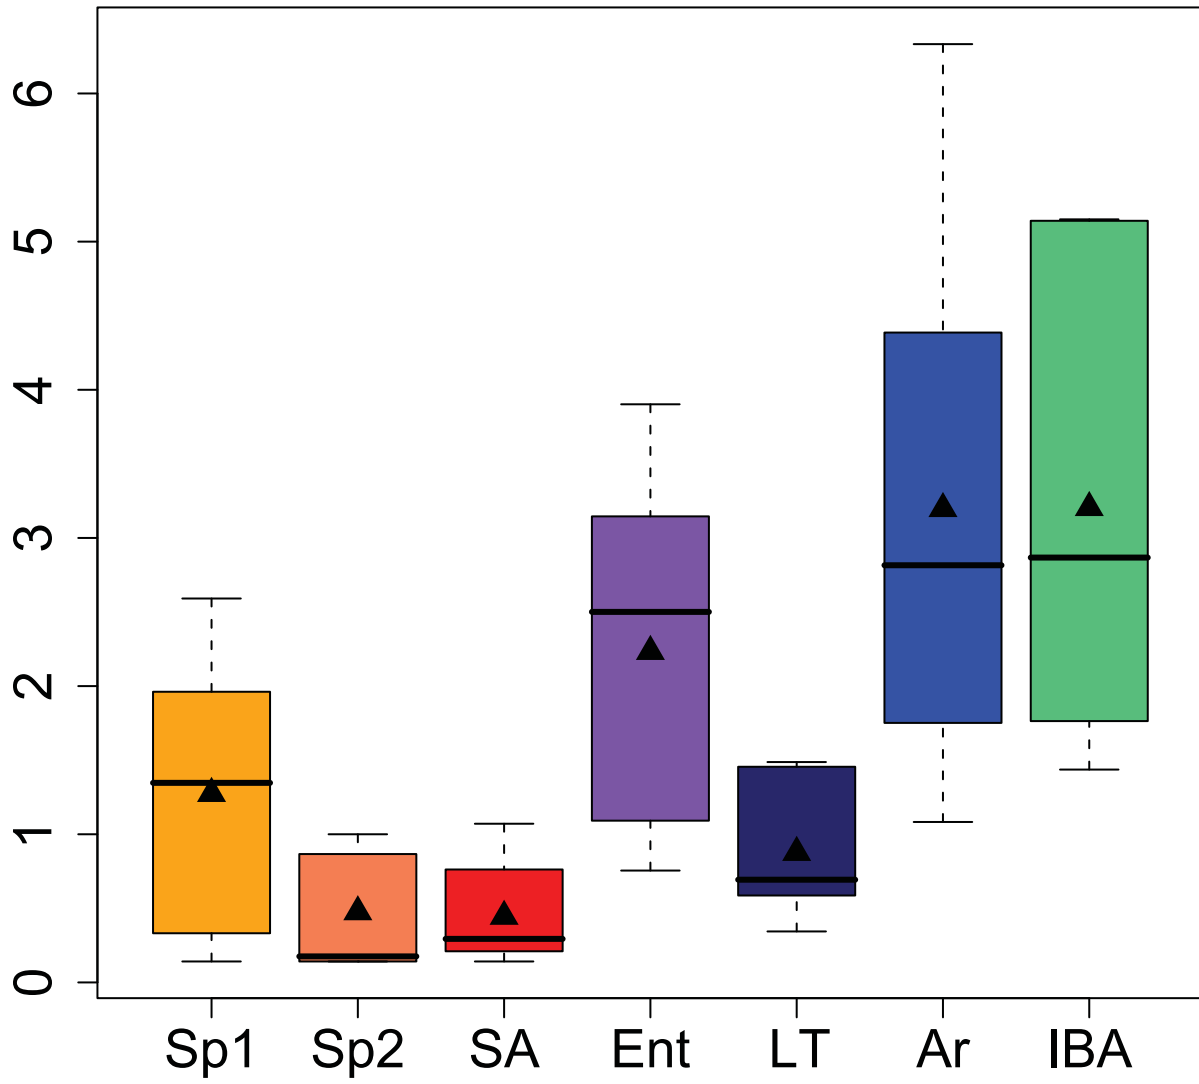

palmitoylcarnitine

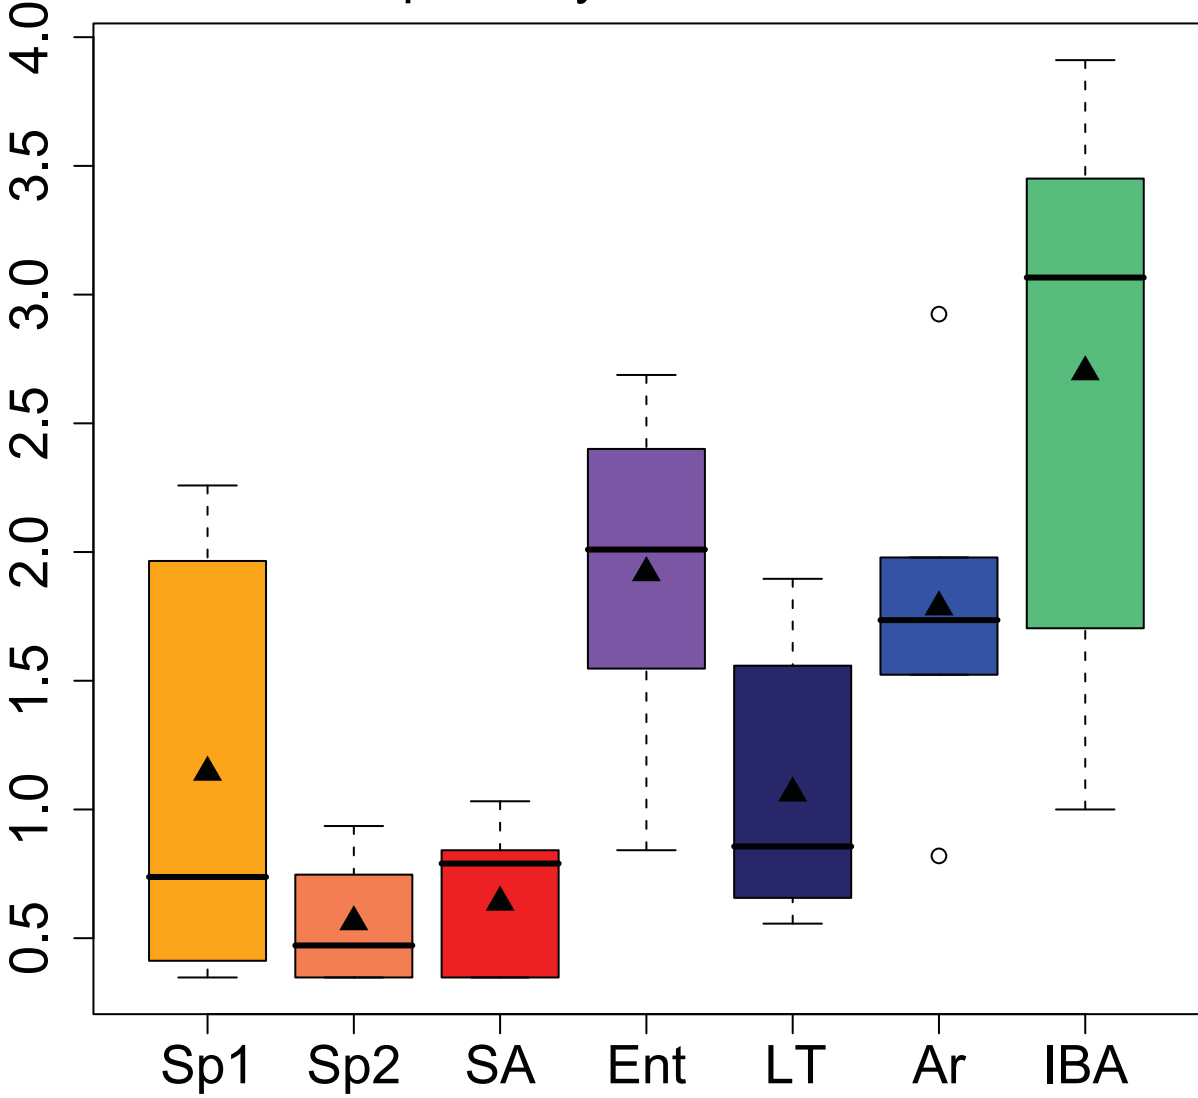

# propionylcarnitine

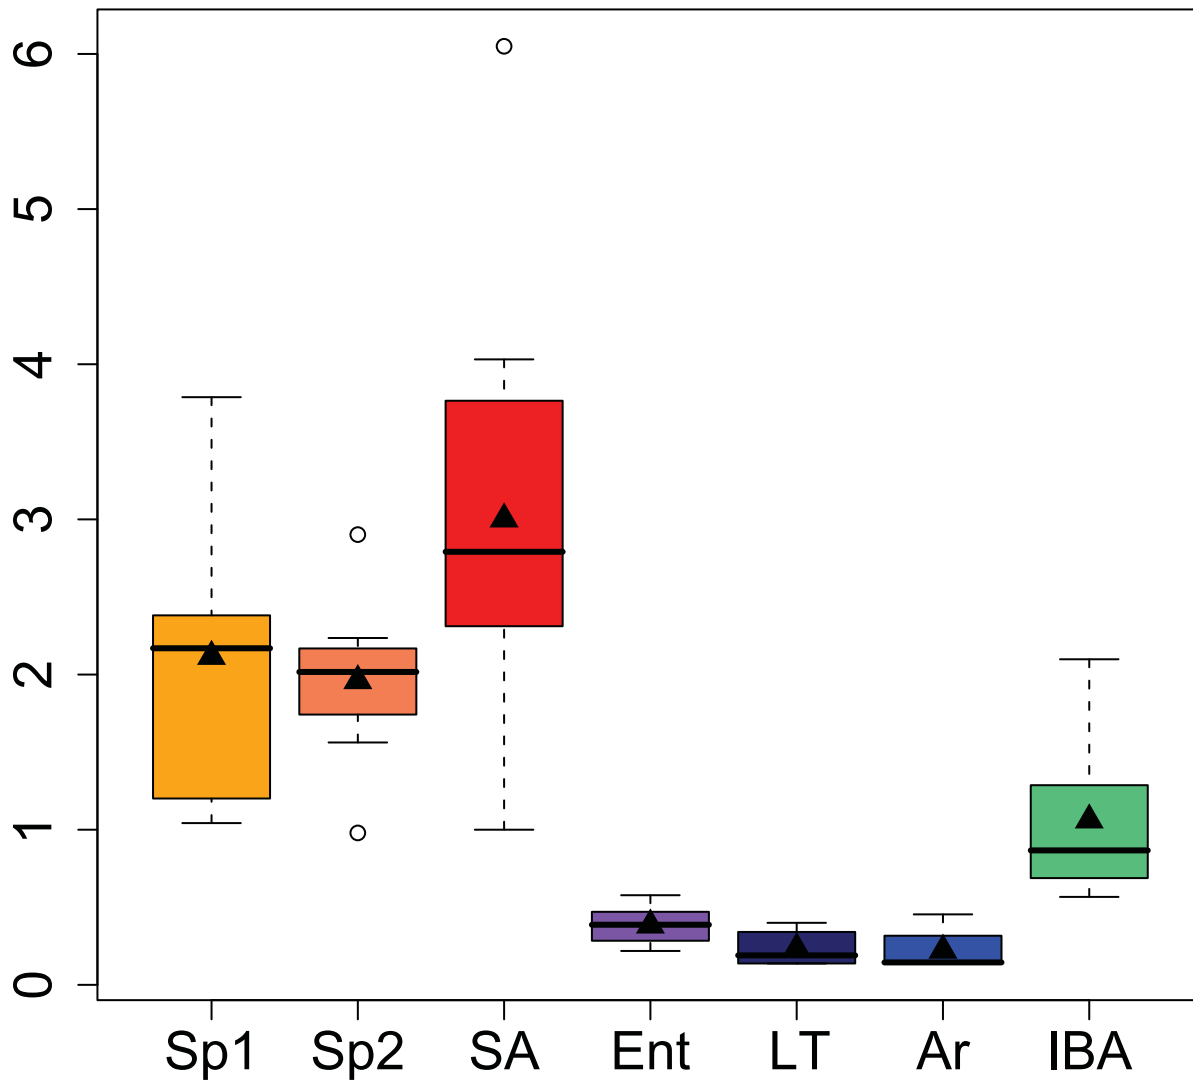

# stearoylcarnitine

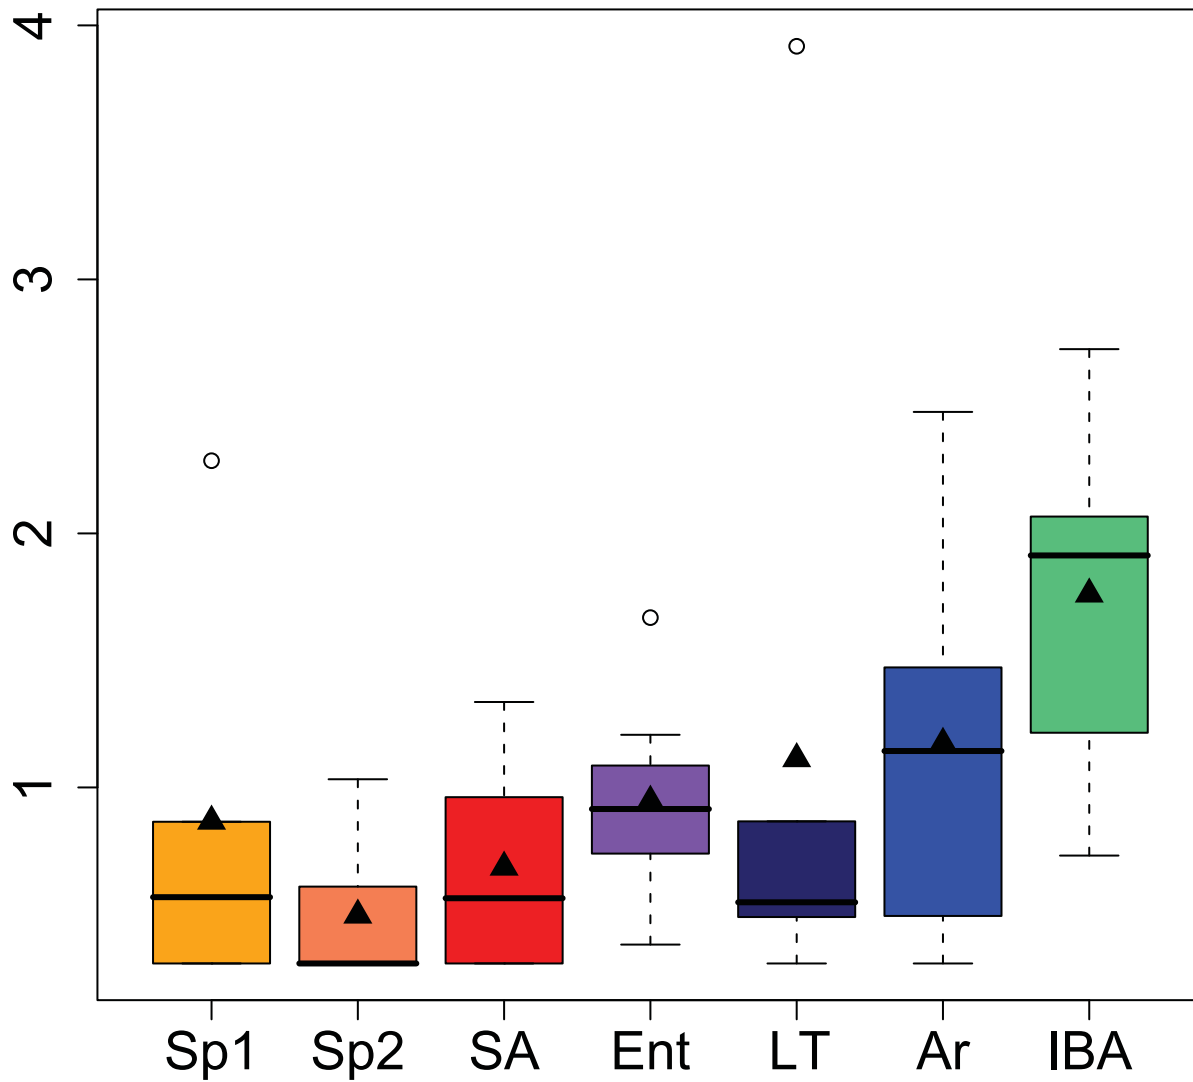

# linoleamide-18-2n6-

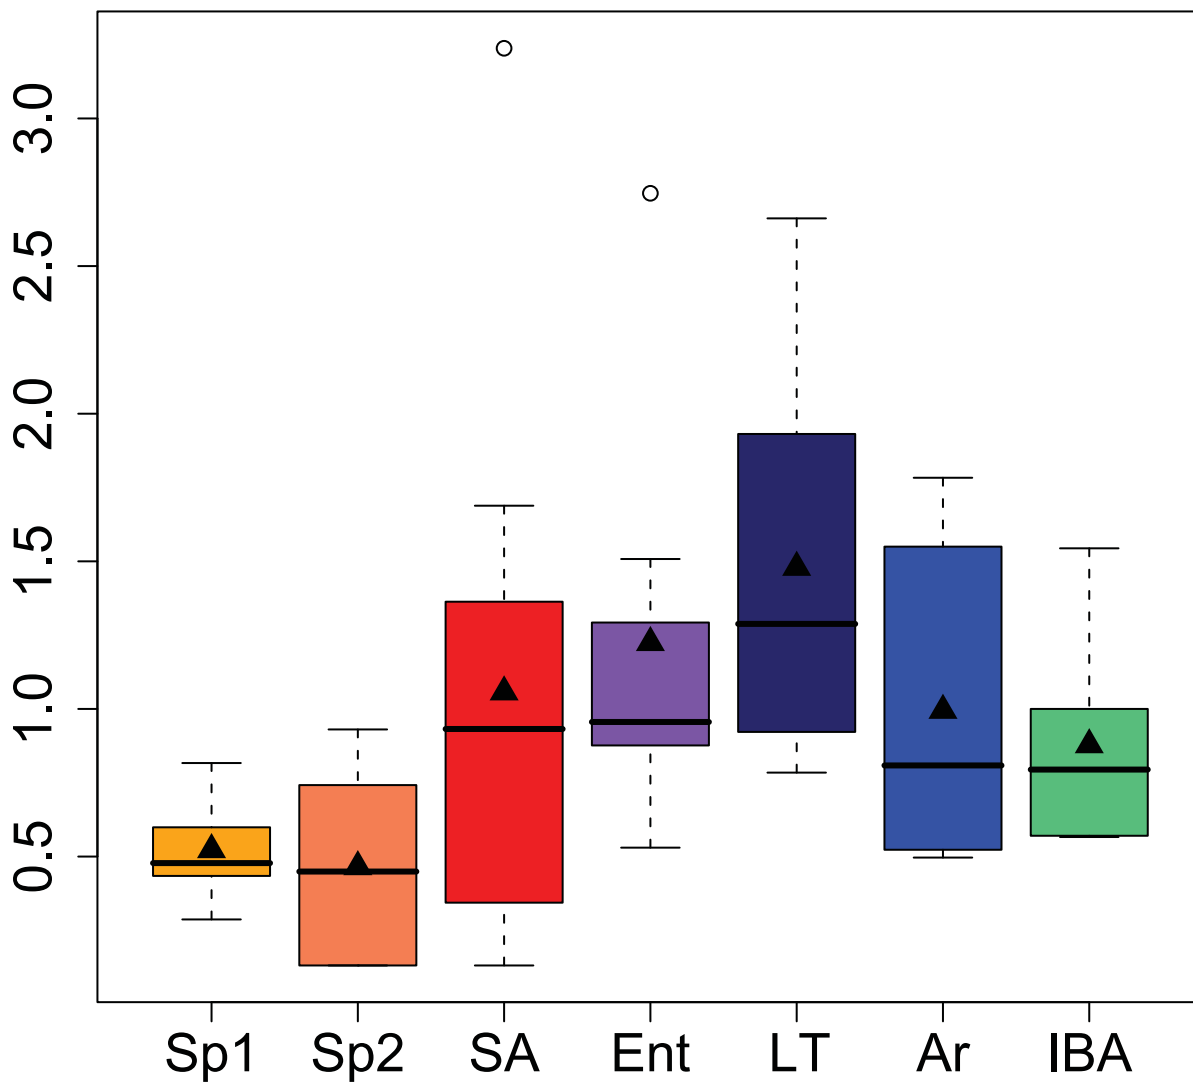



# oleamide

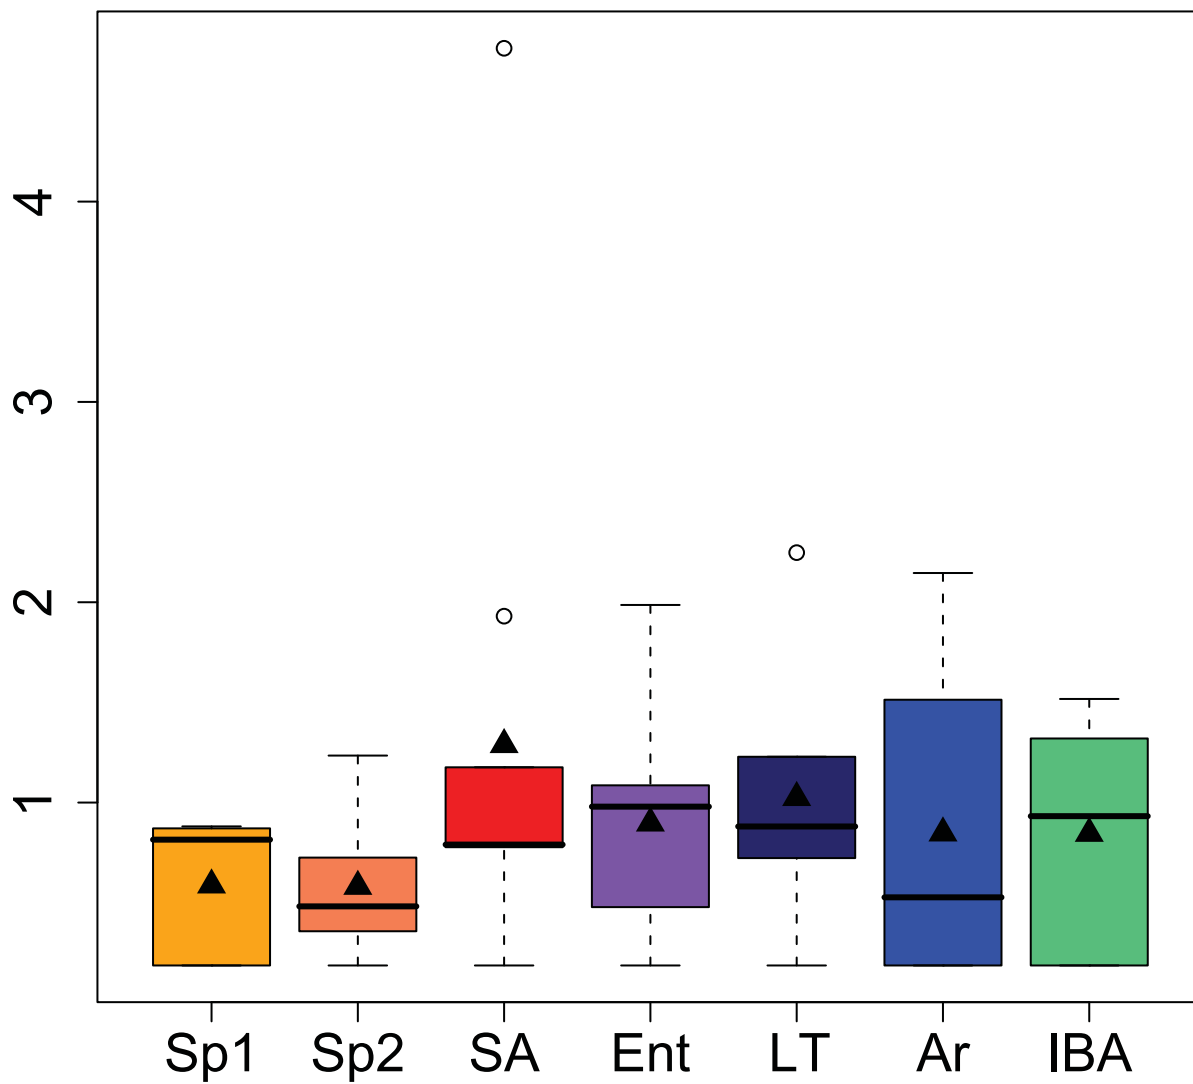

### 5-dodecenoate (12:1n7)

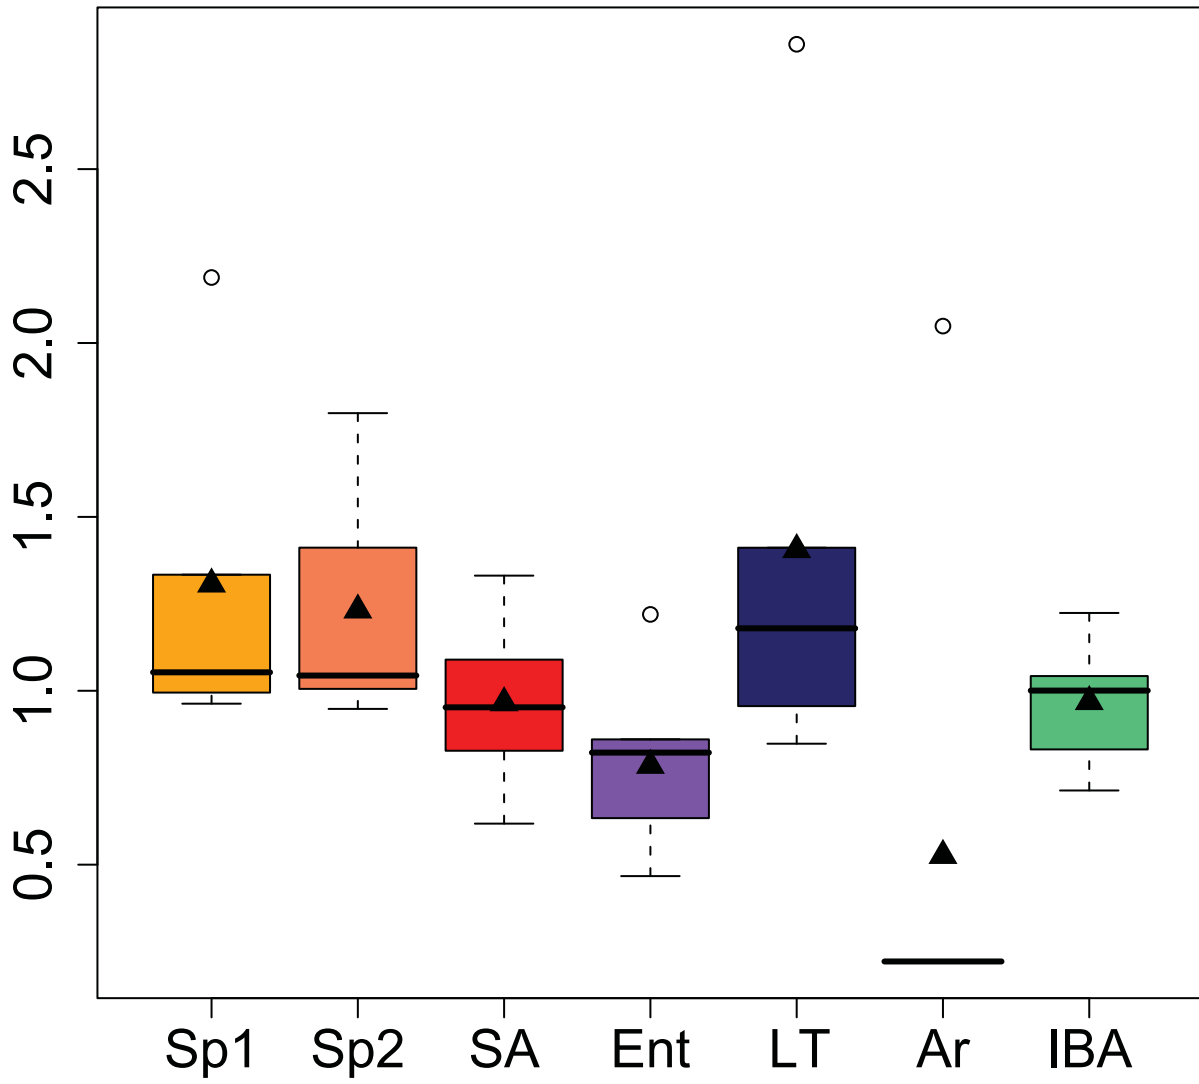

eicosenoate (20:1n9 or 11)

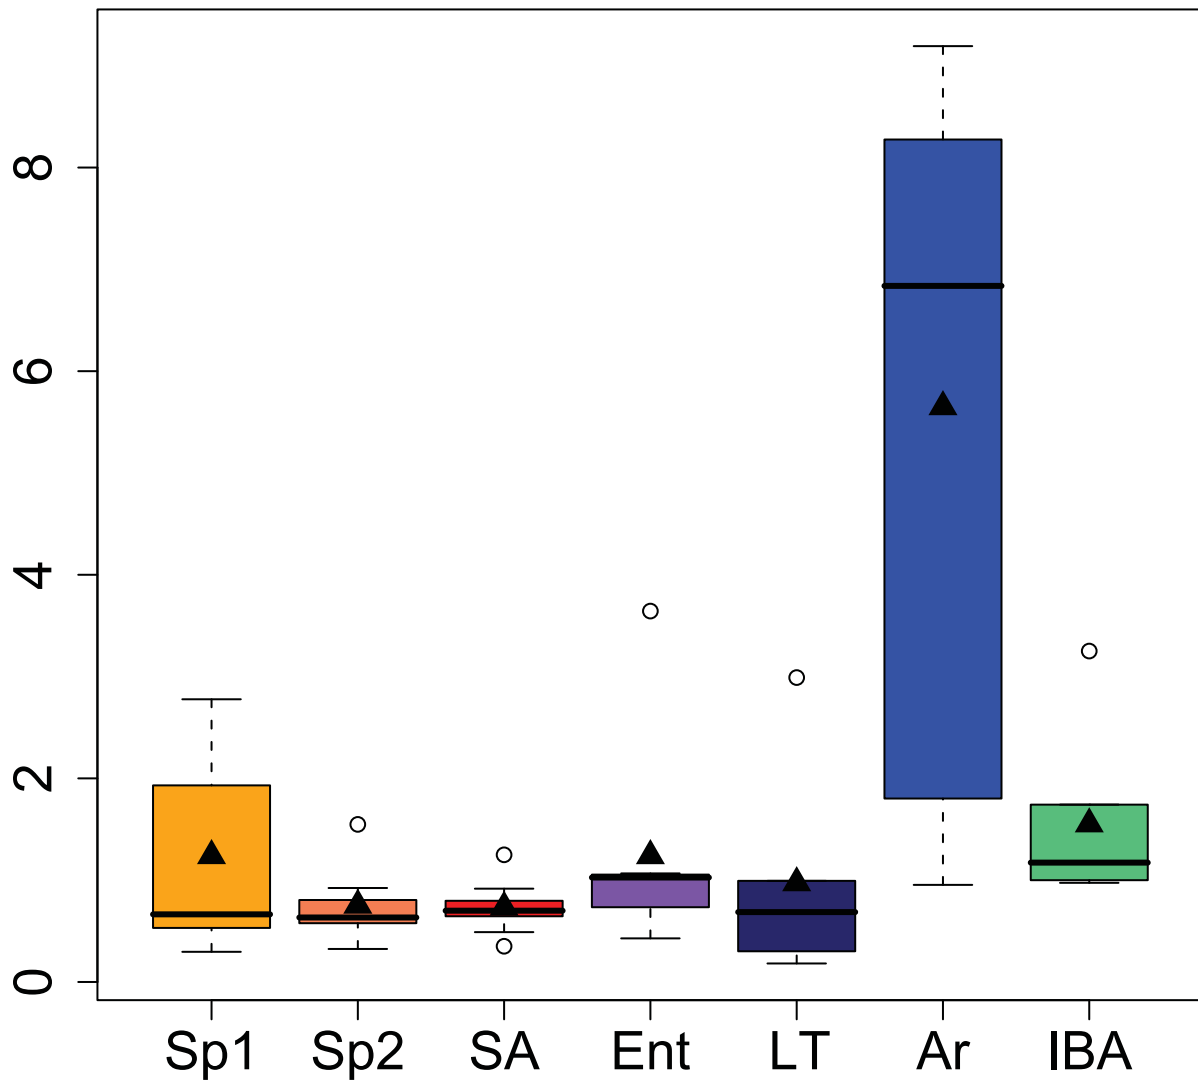

myristoleate (14:1n5)

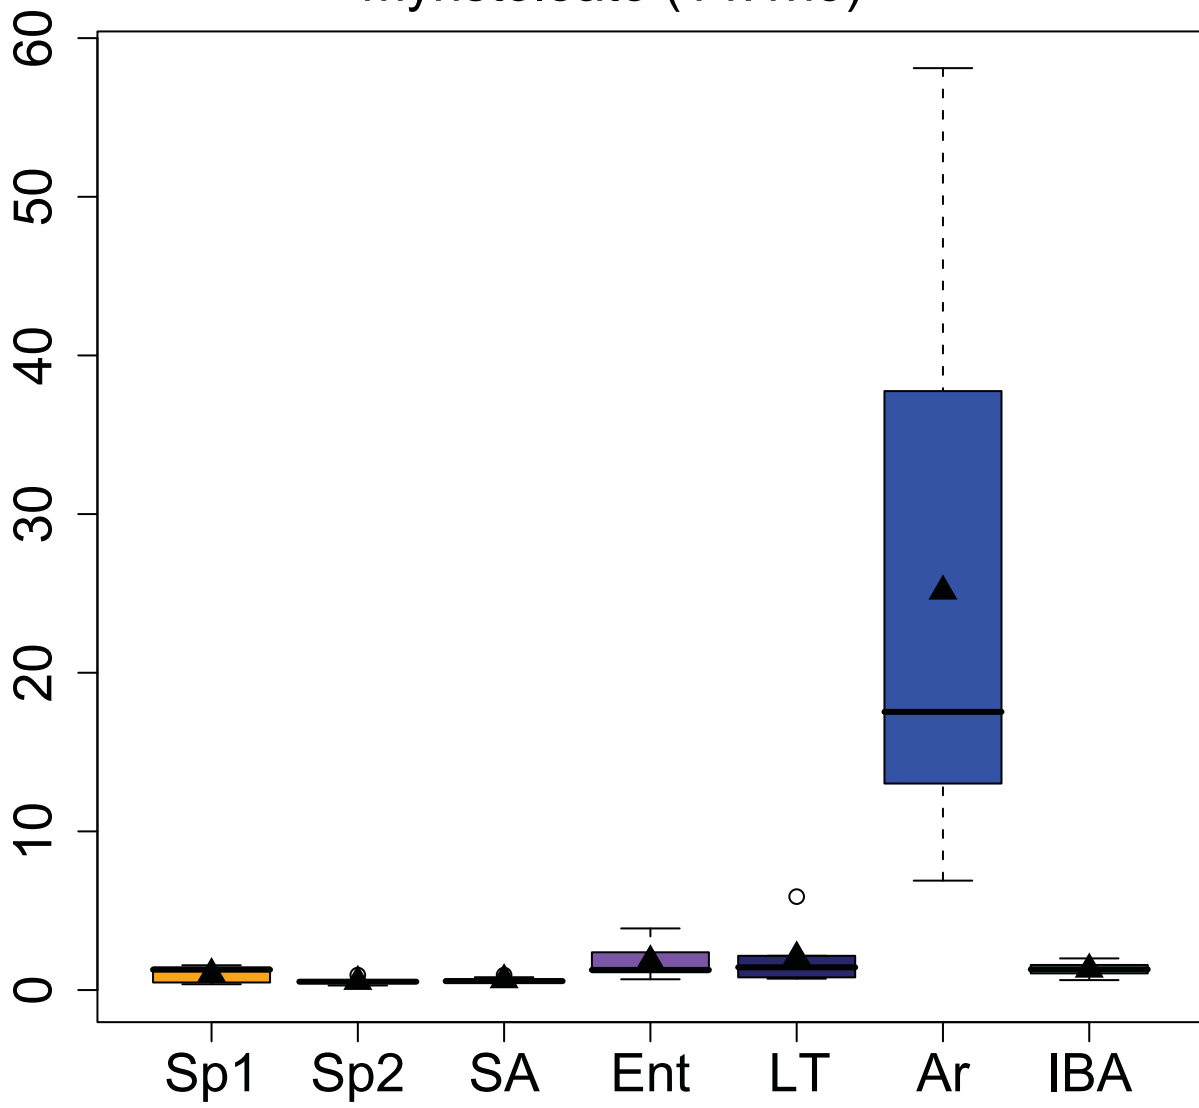

oleate (18:1n9)

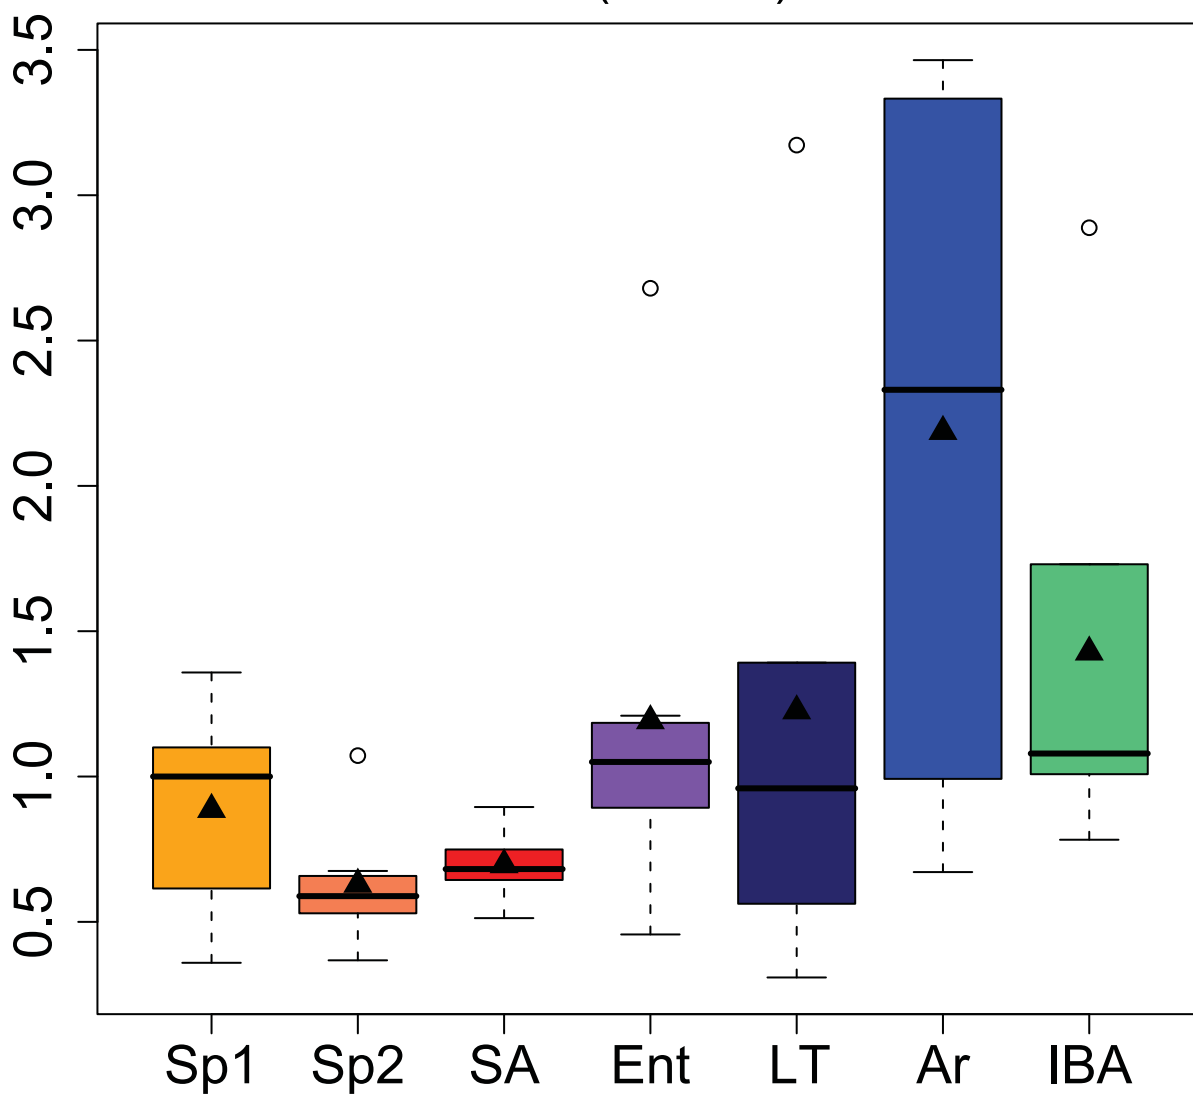

palmitoleate (16:1n7)

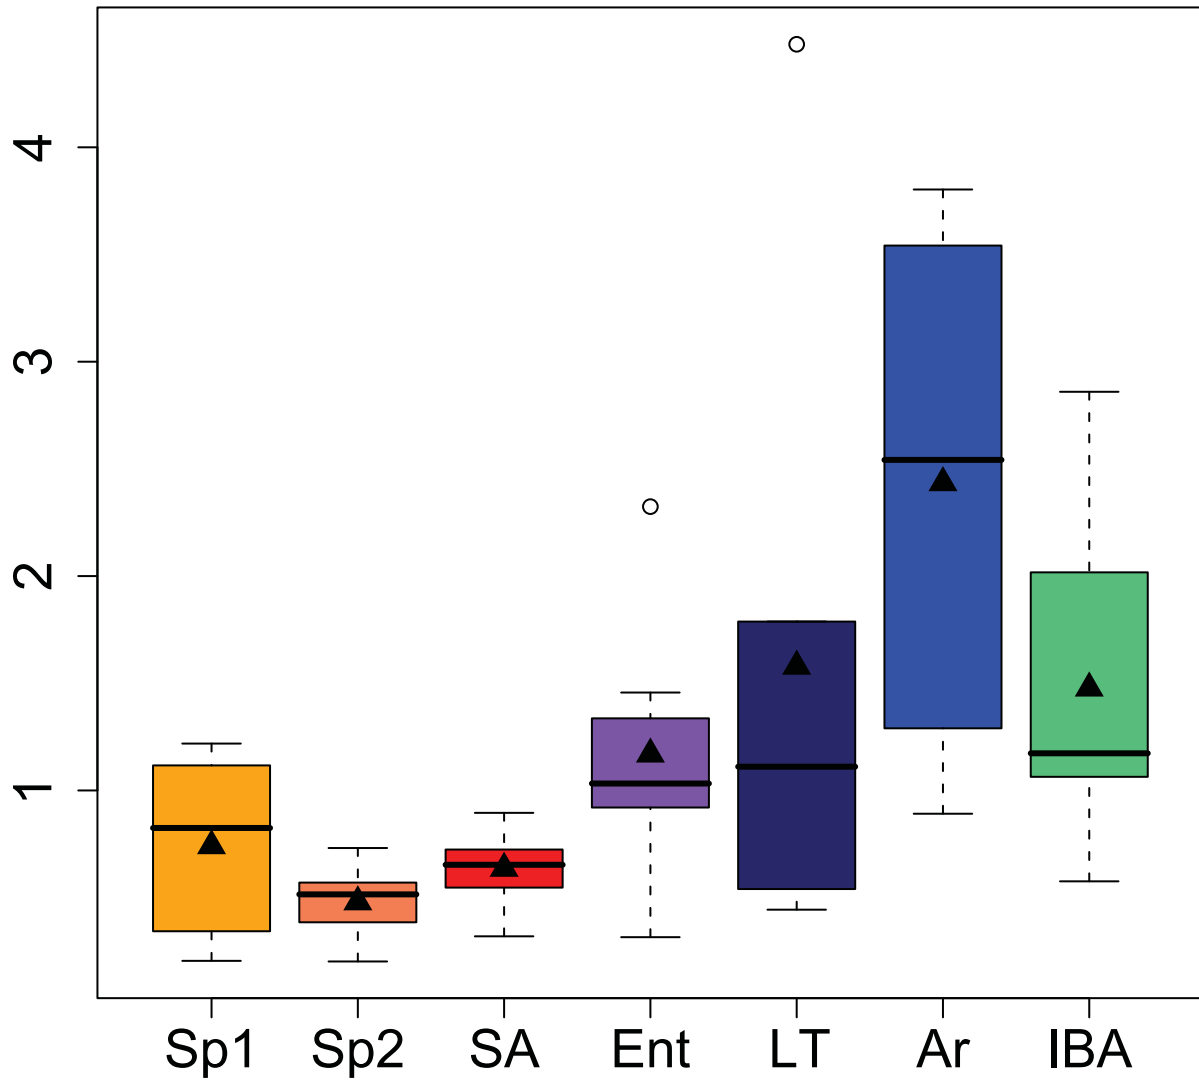

# 10-heptaadecenoate (17:1n7)

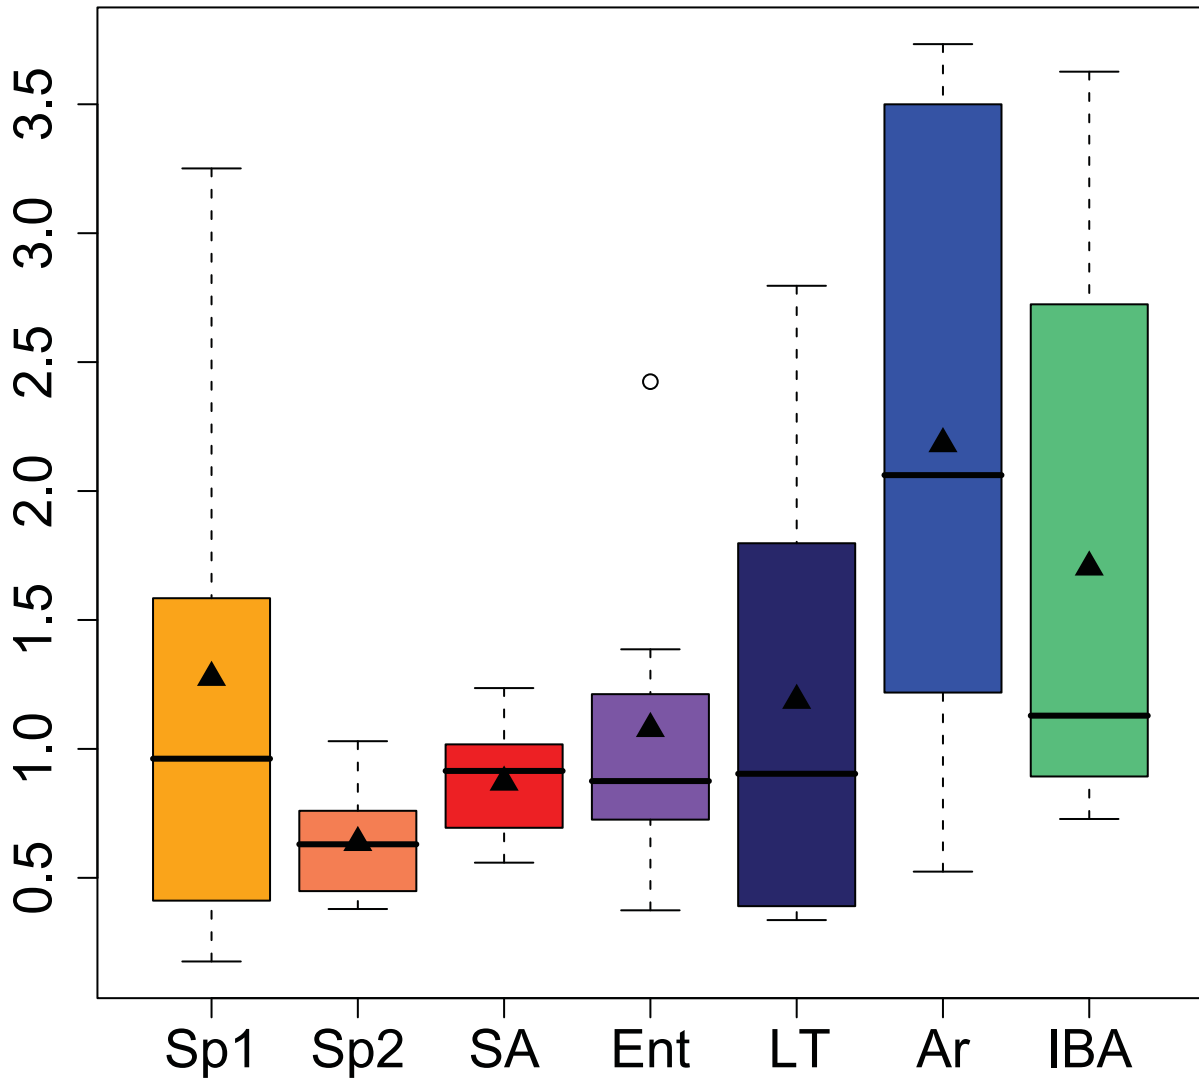

# 10-nonadecenoate (19:1n9)

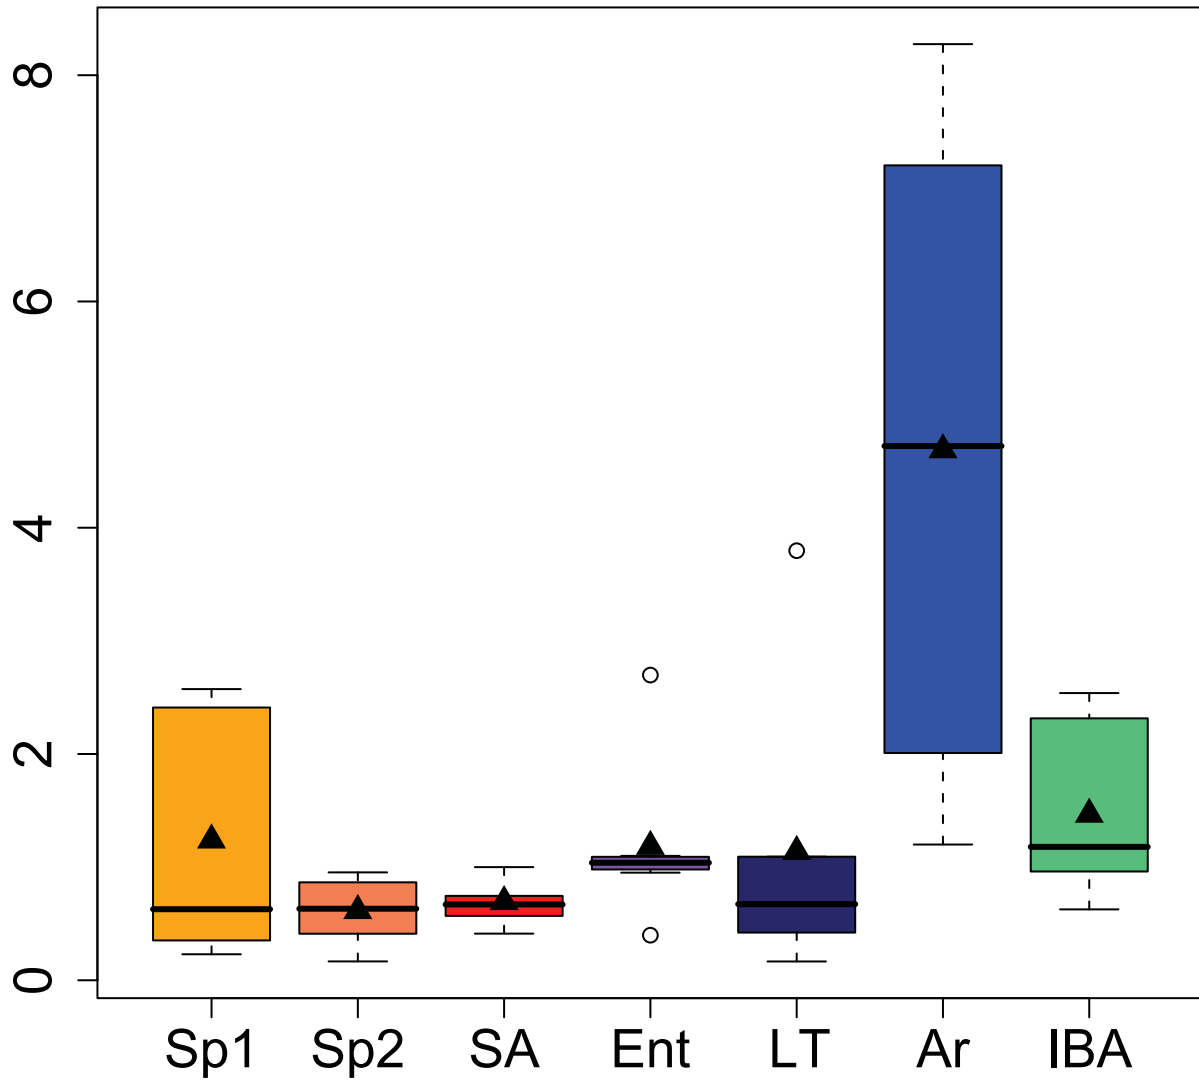



adrenate (22:4n6)

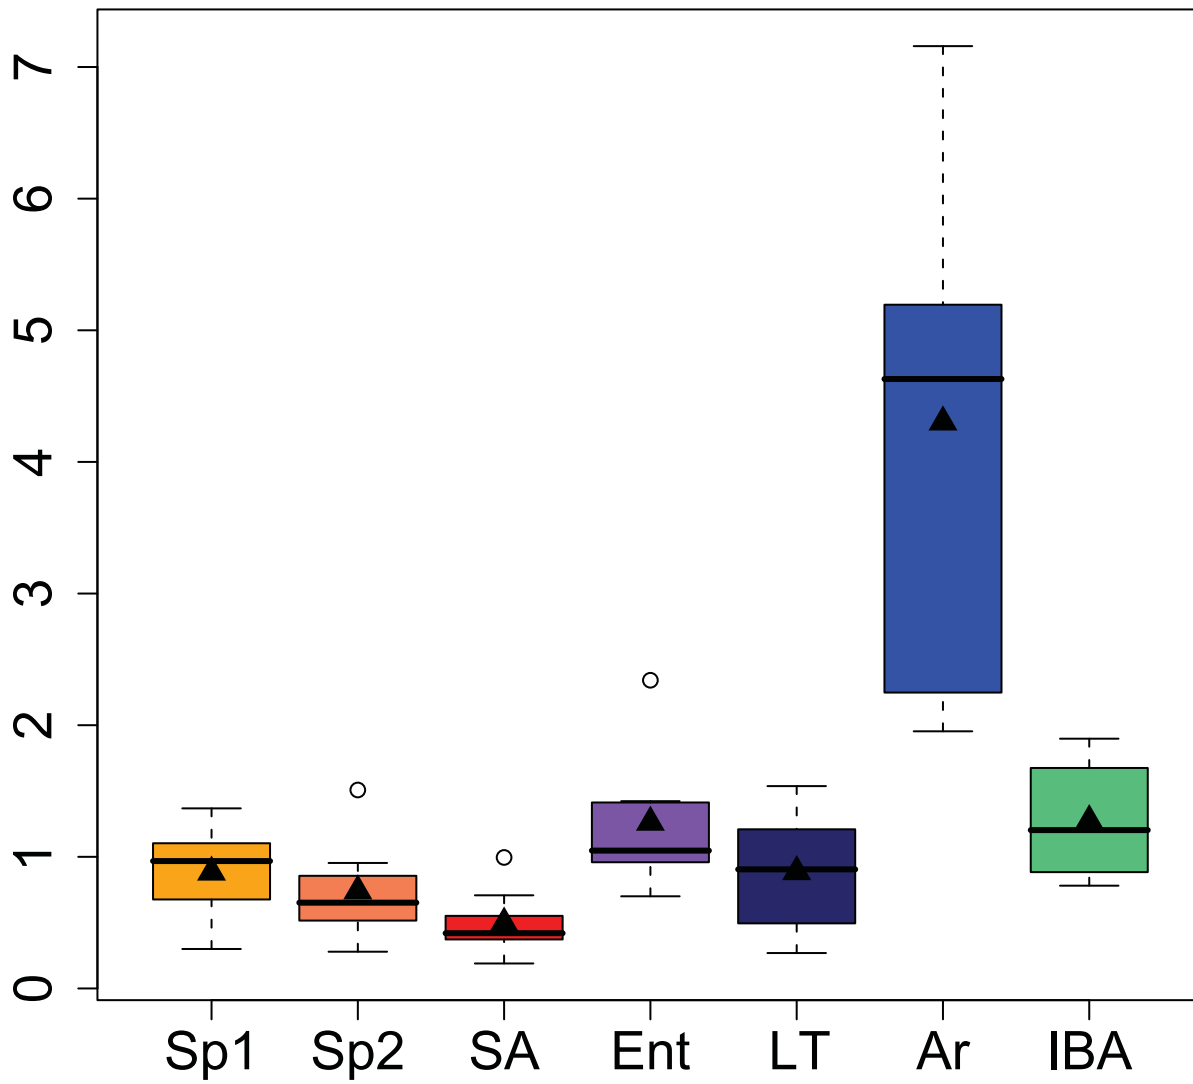

# arachidonate (20:4n6)

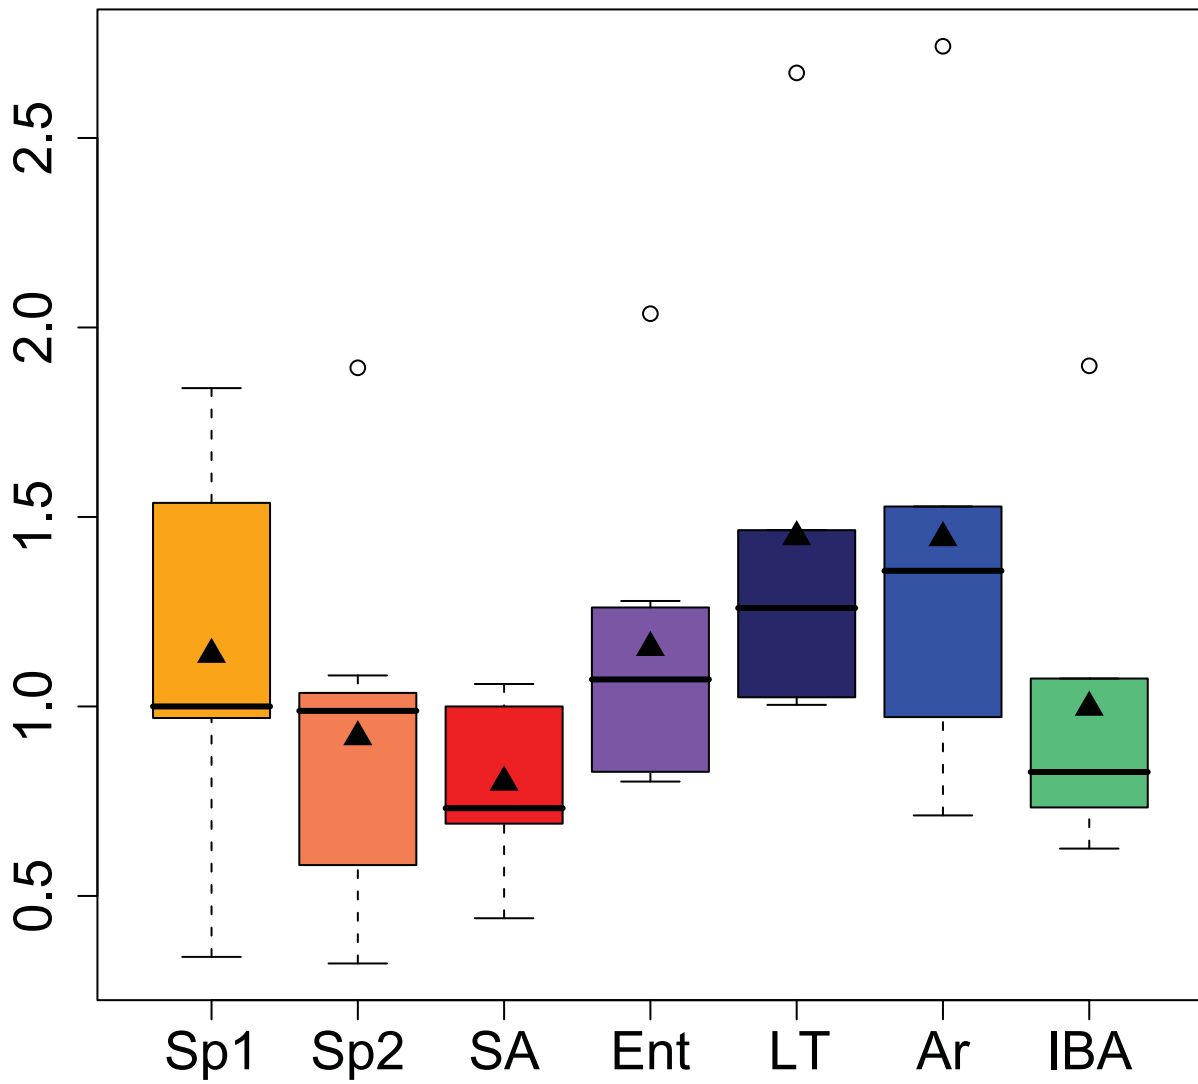

# dihomo-linoleate-20-2n6-

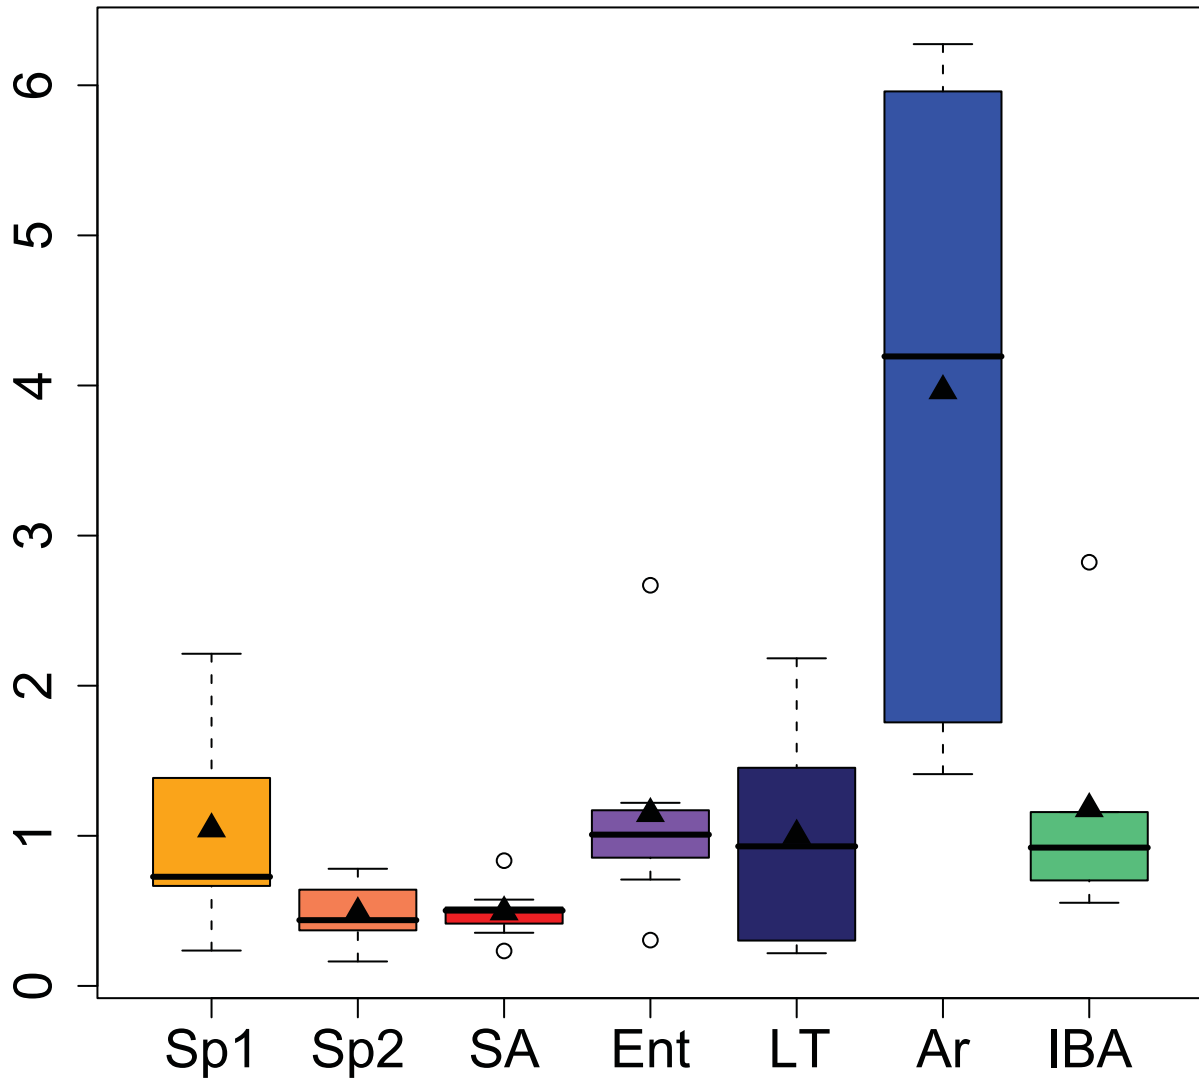

dihomo-linolenate-20-3n3-or-n6-

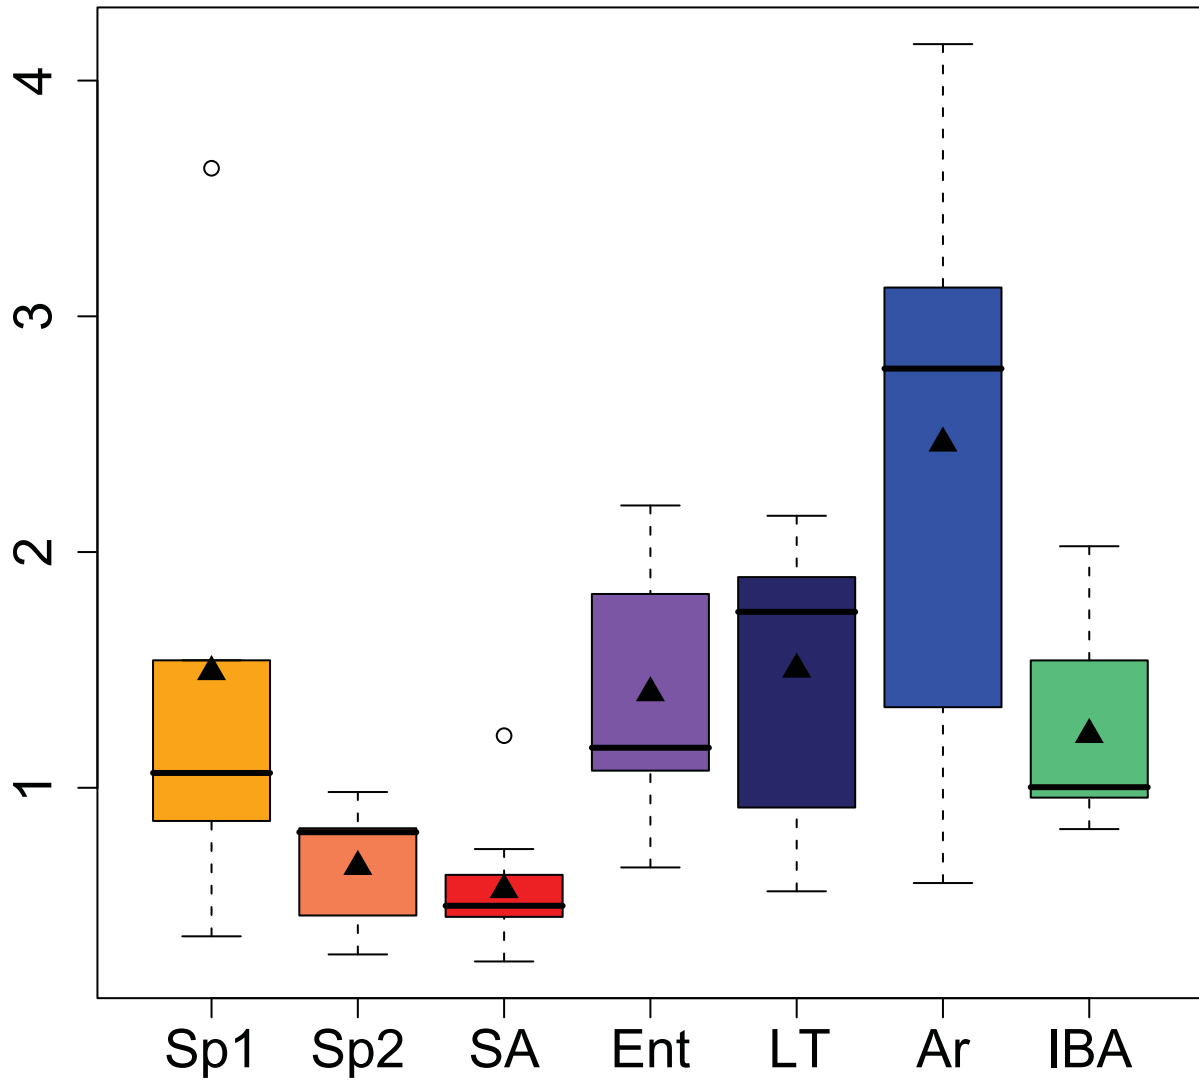

docosahexaenoate (DHA; 22:6n3)

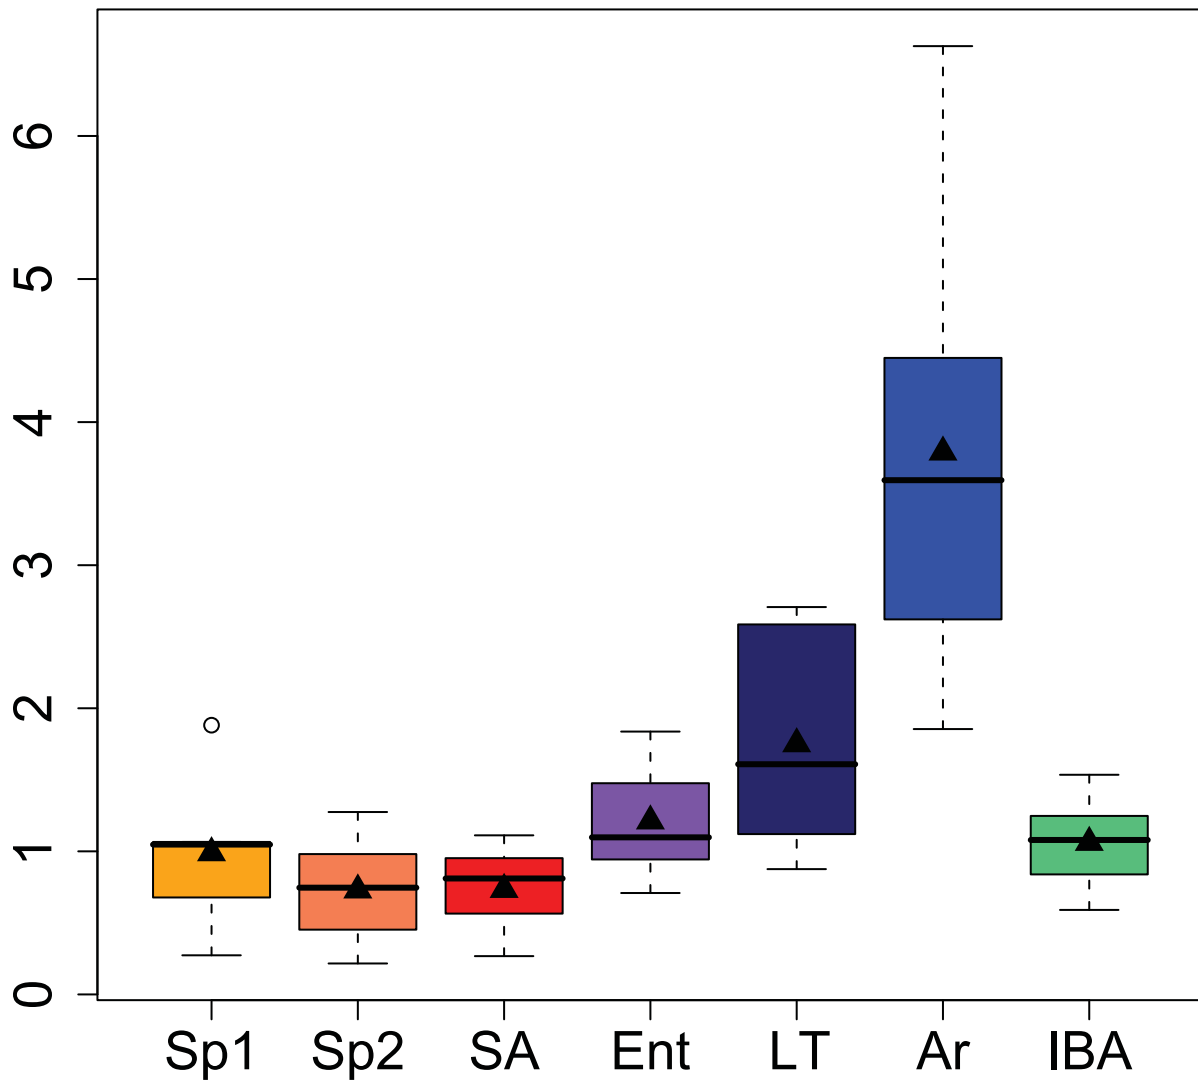

docosapentaenoate (n3-DPA; 22:5n3)

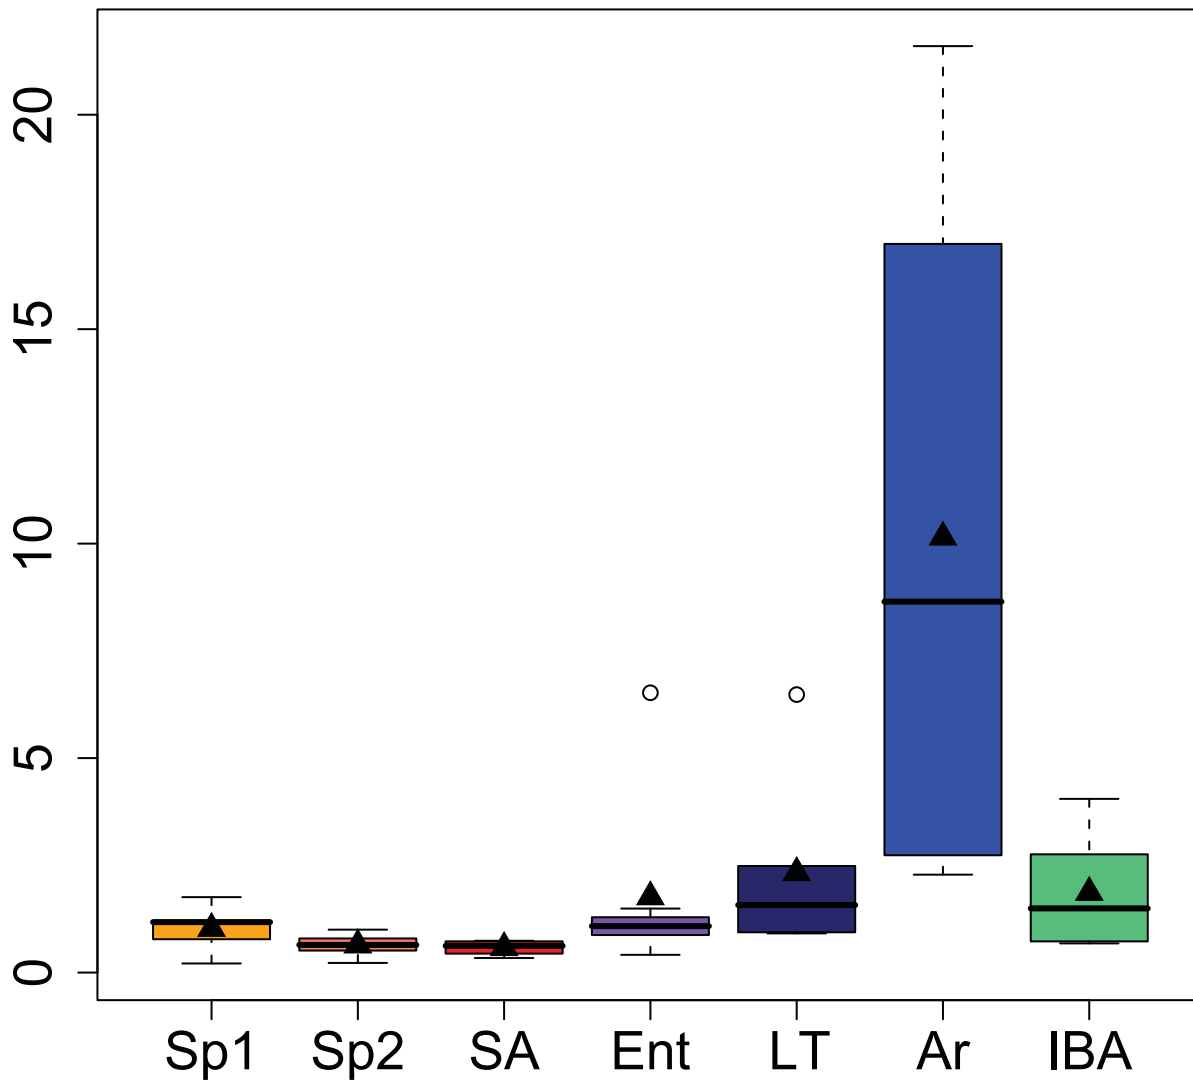

eicosapentaenoate (EPA; 20:5n3)

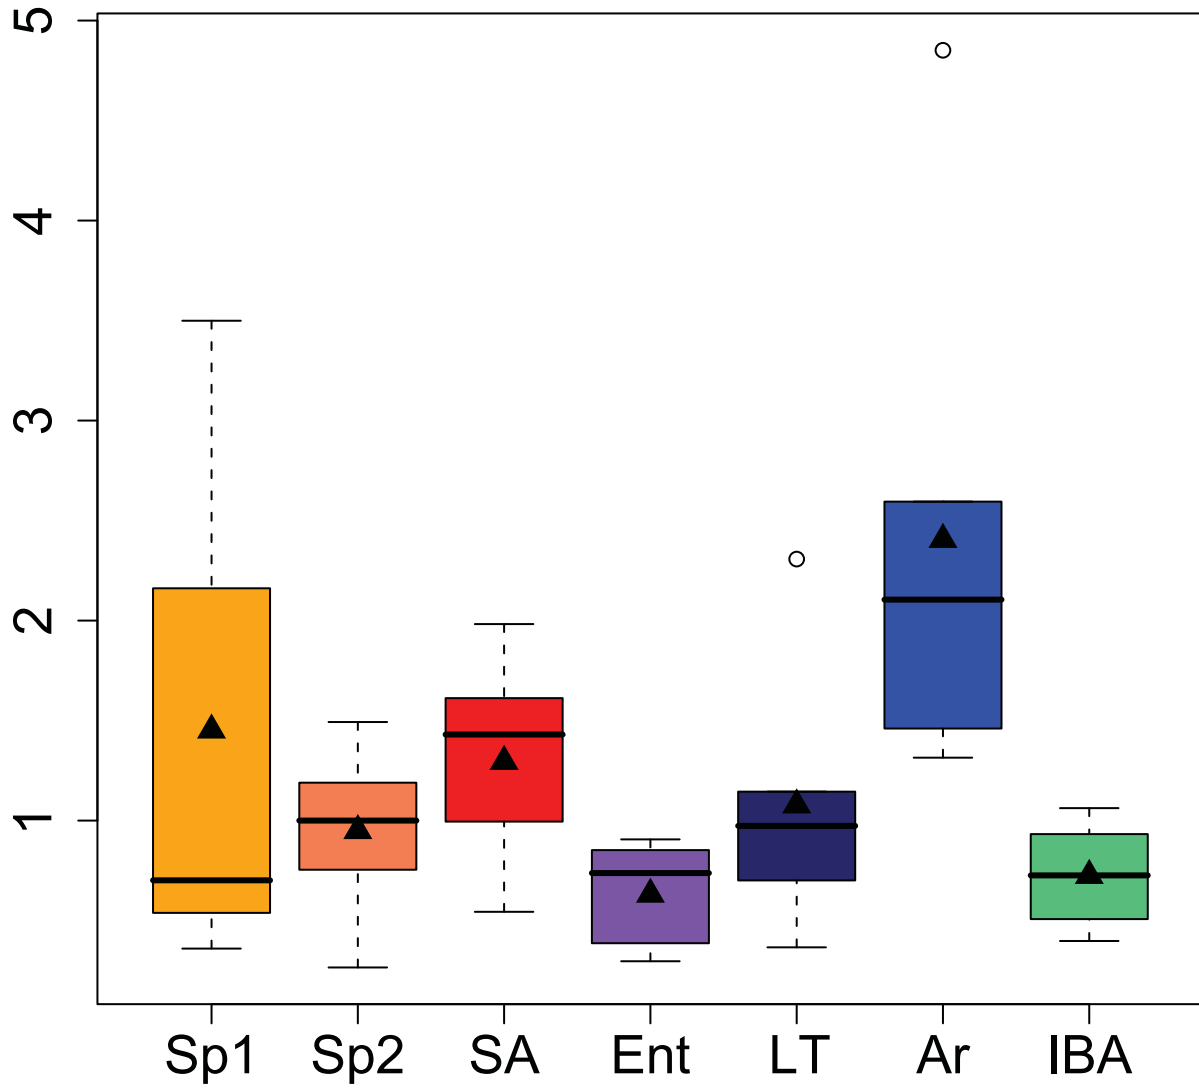

# linoleate (18:2n6)

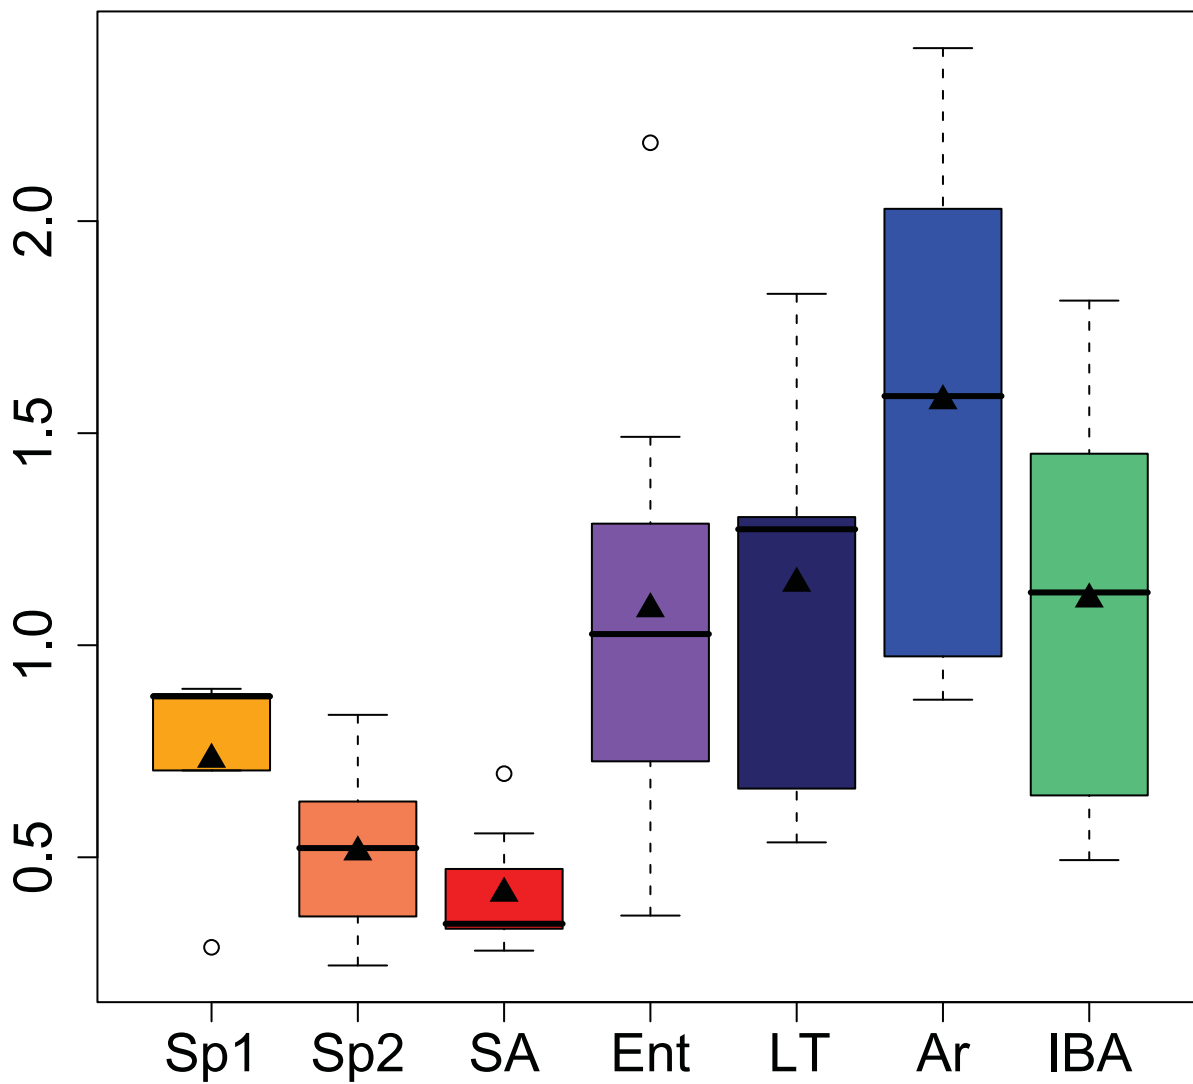



linolenate [alpha or gamma] (18:3n3 or 6)

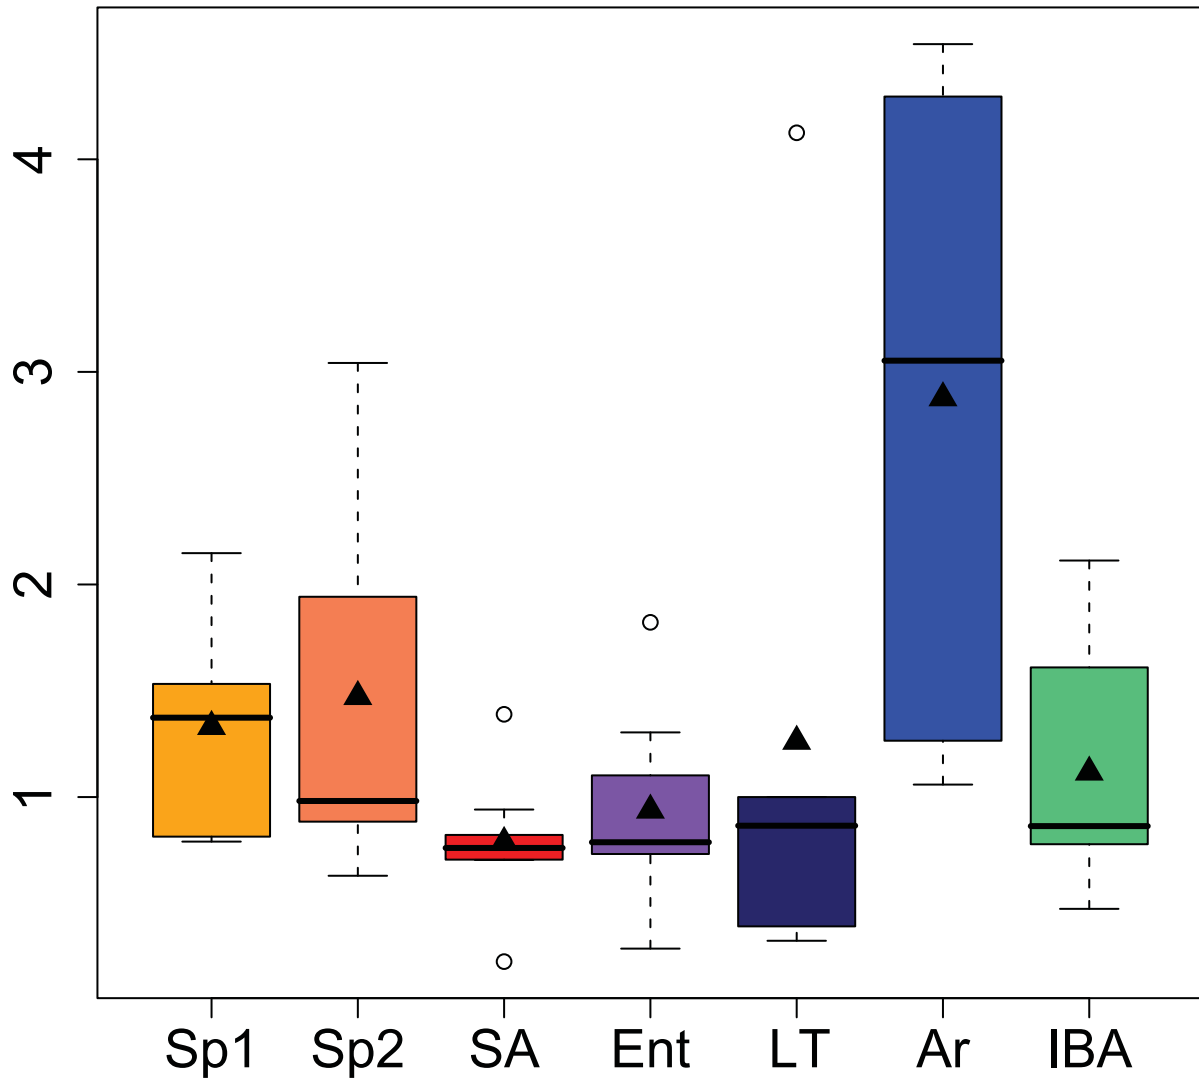

stearidonate (18:4n3)

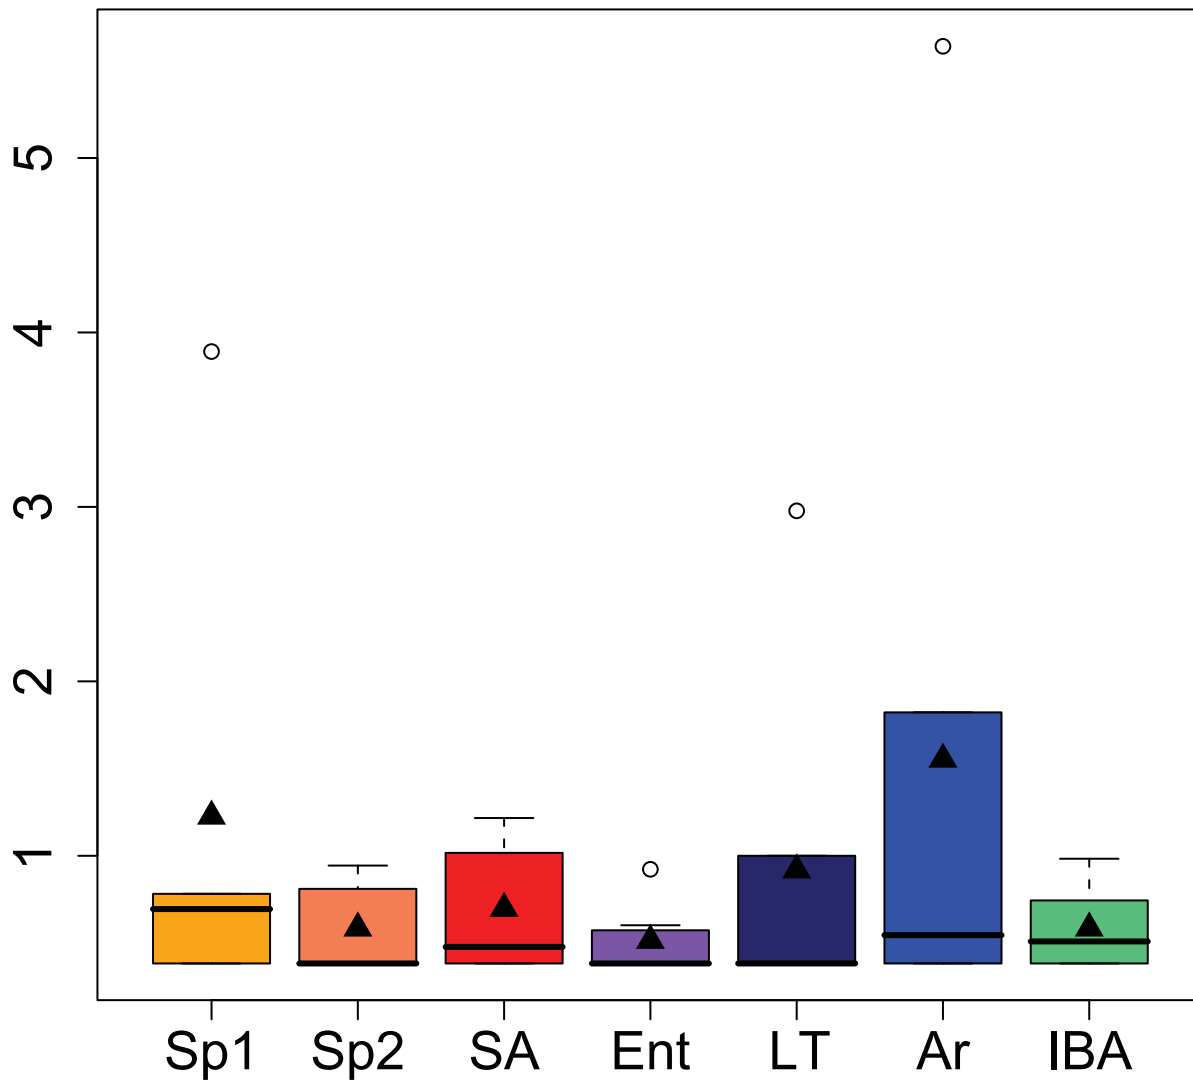

# isovalerate

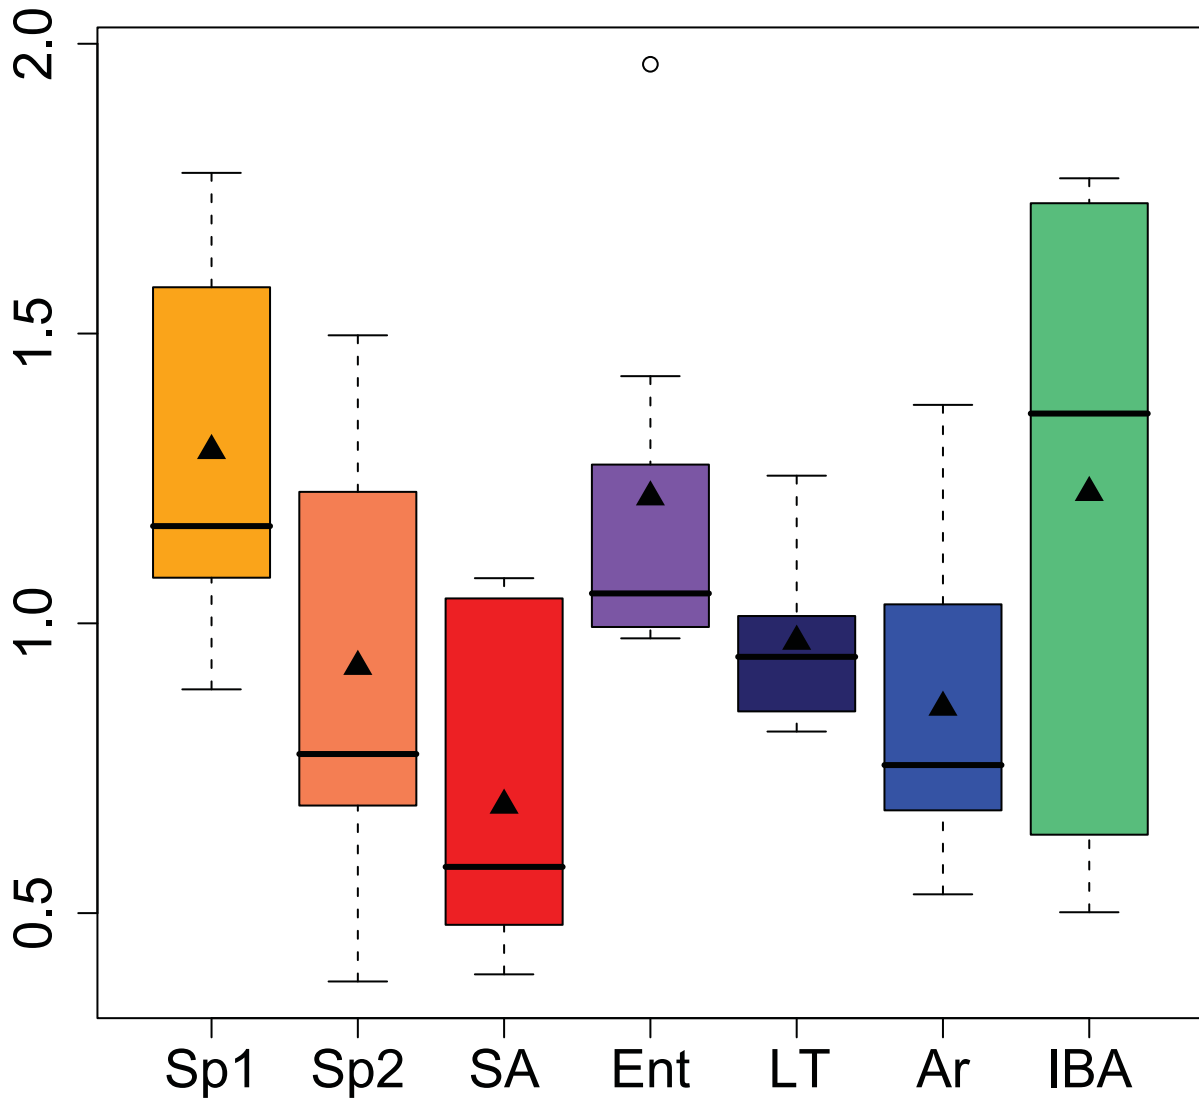

azelate (nonanedioate)

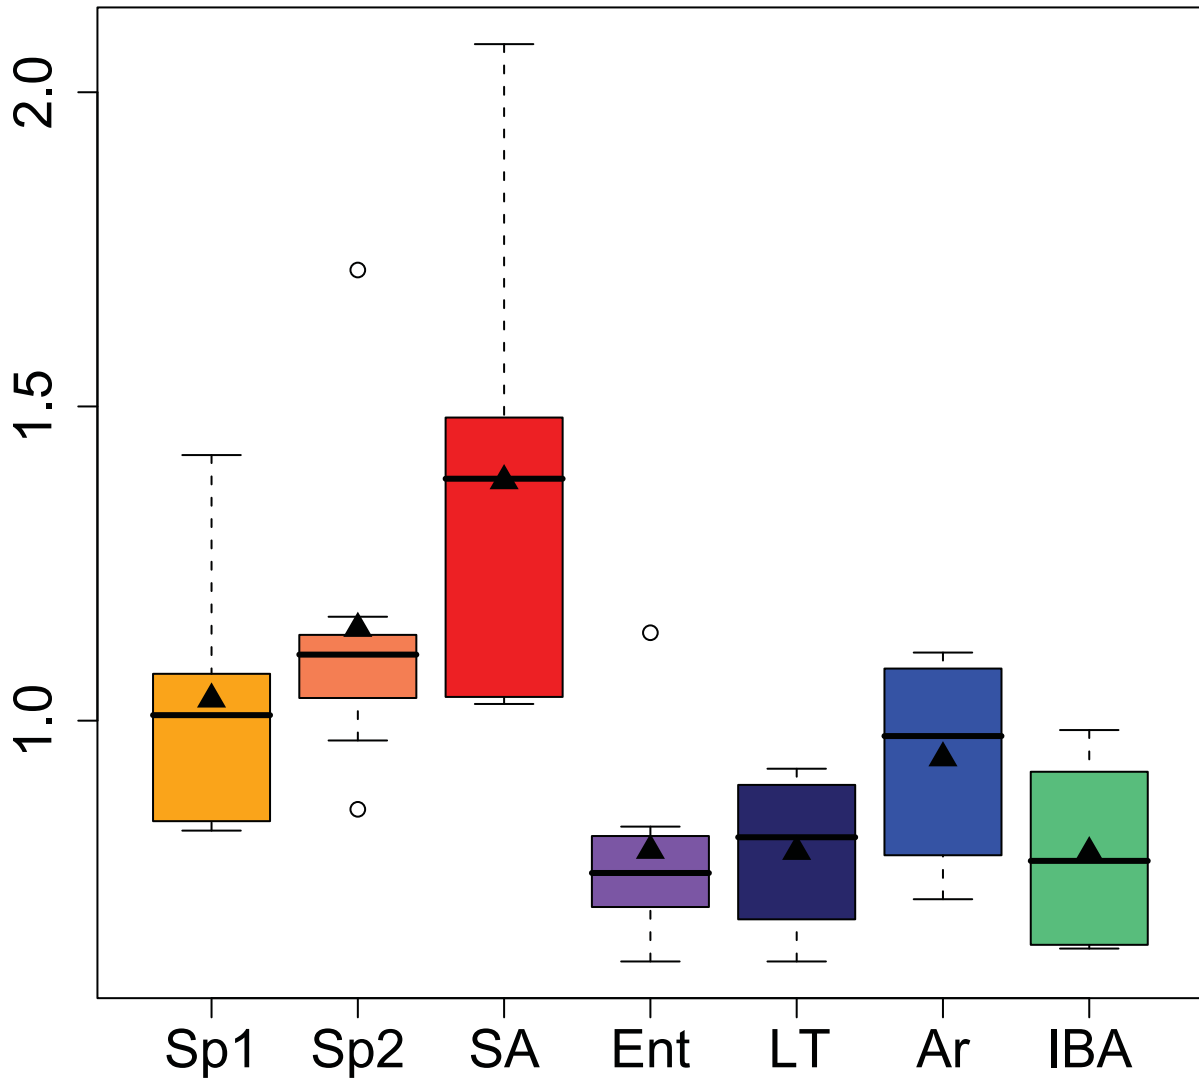

# hexadecanedioate

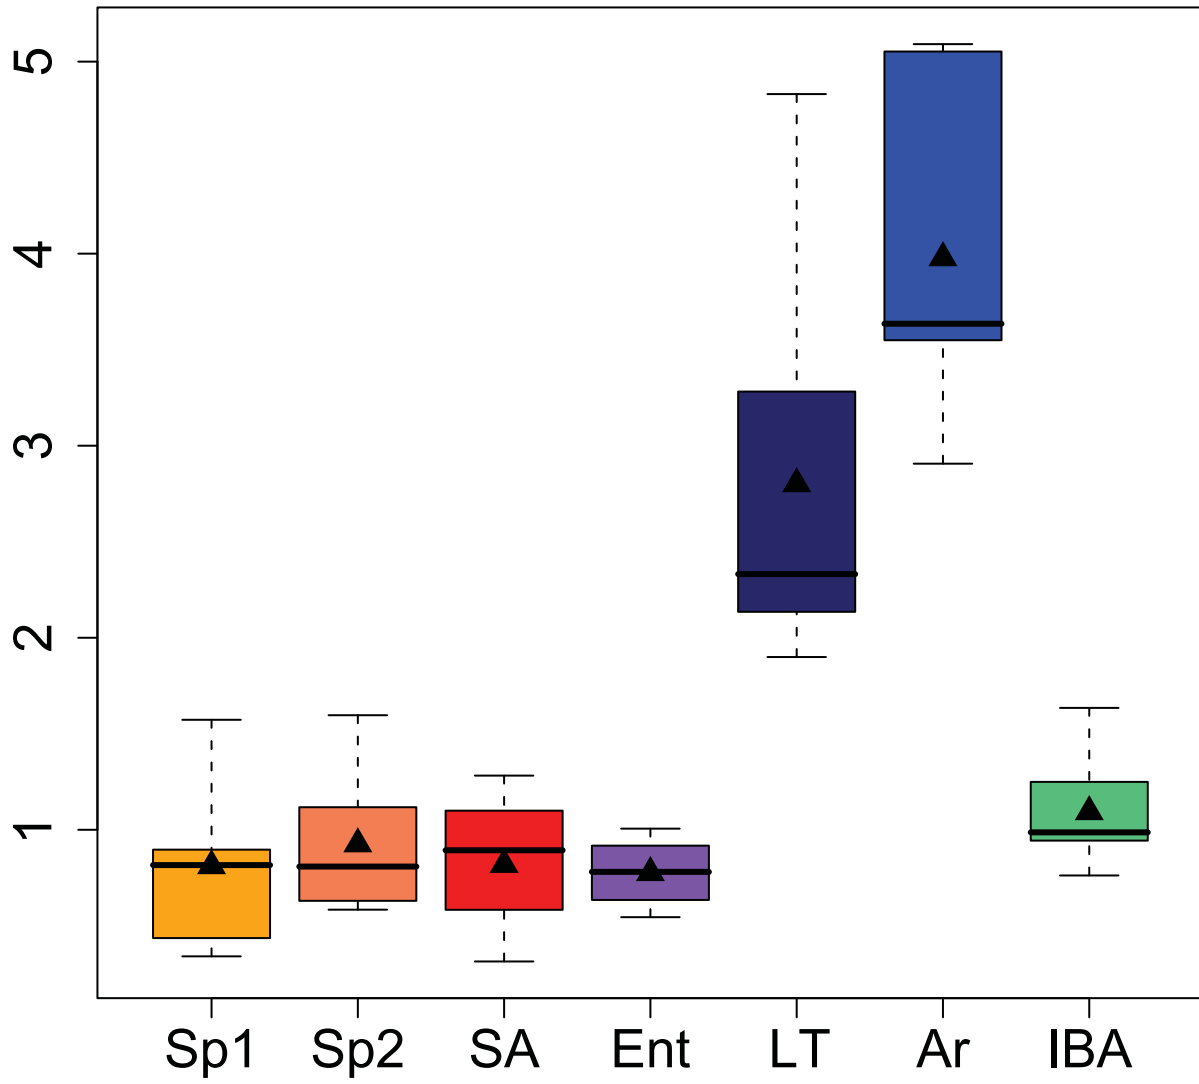

# tetradecanedioate

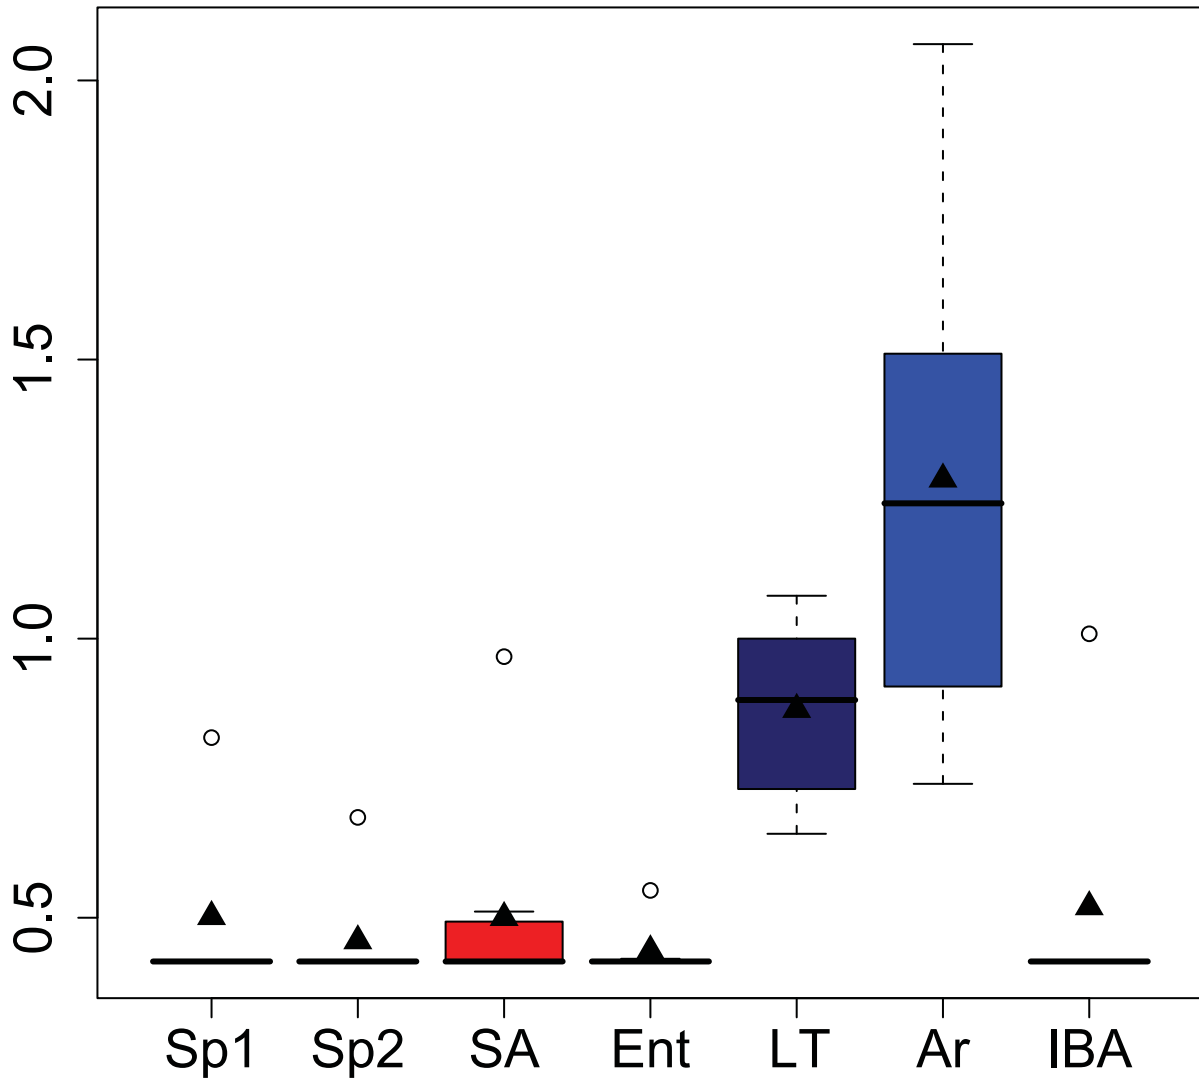

# 2-ethylhexanoic acid

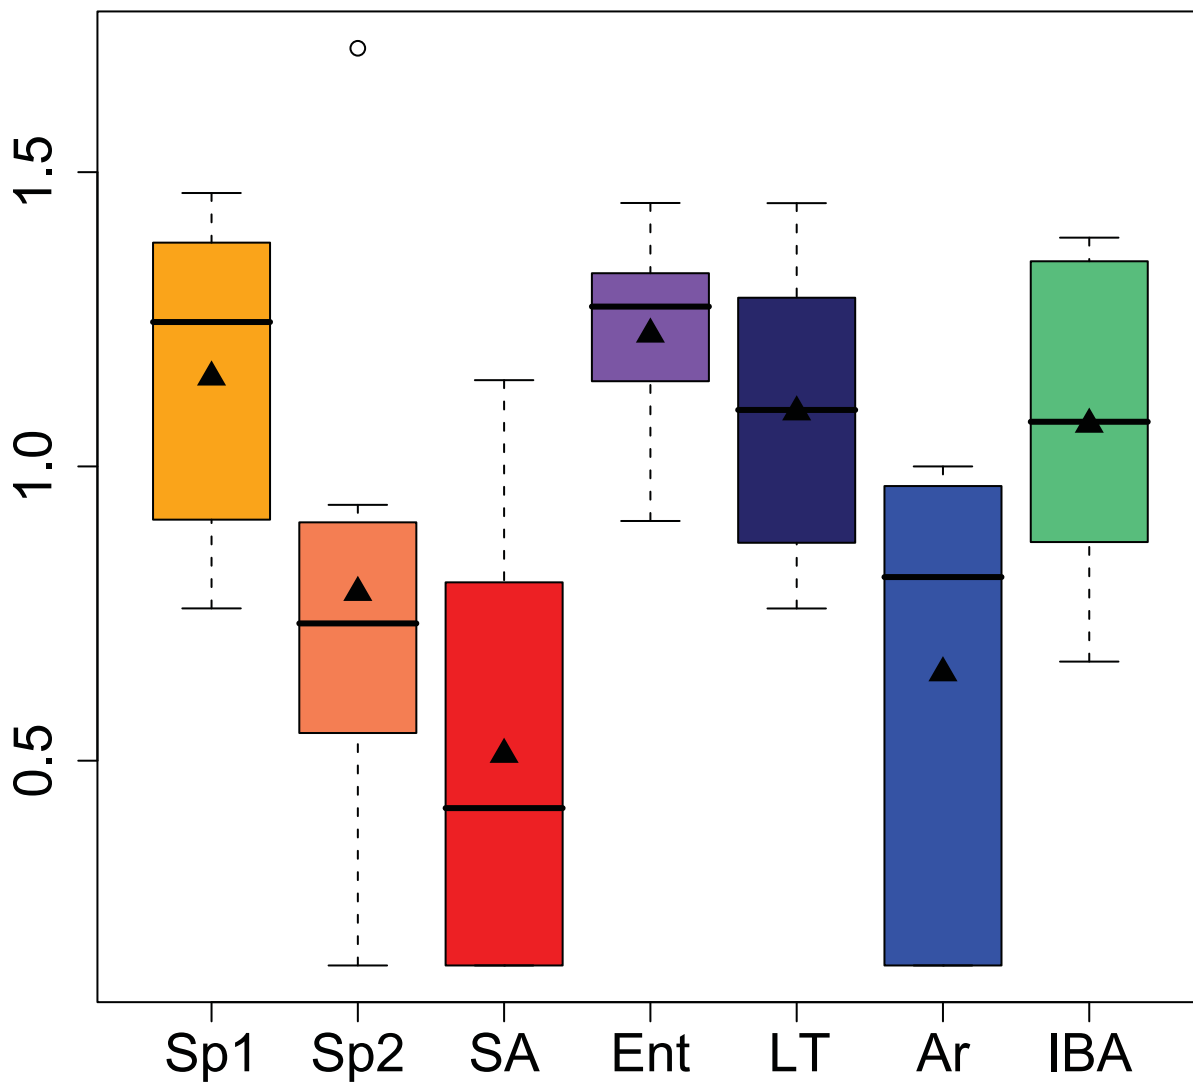

caprate (10:0)

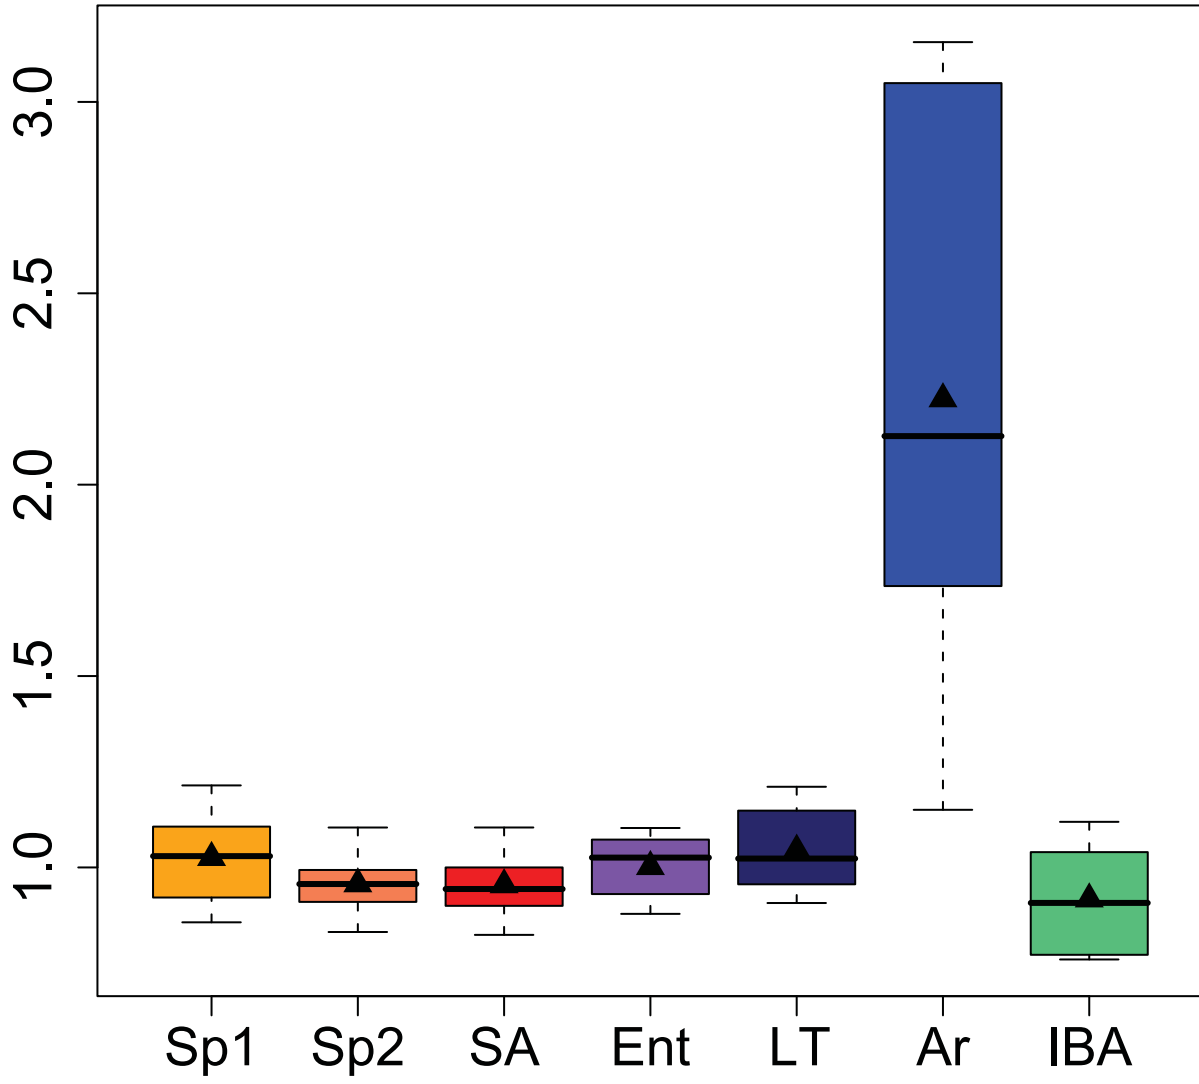



caproate (6:0)

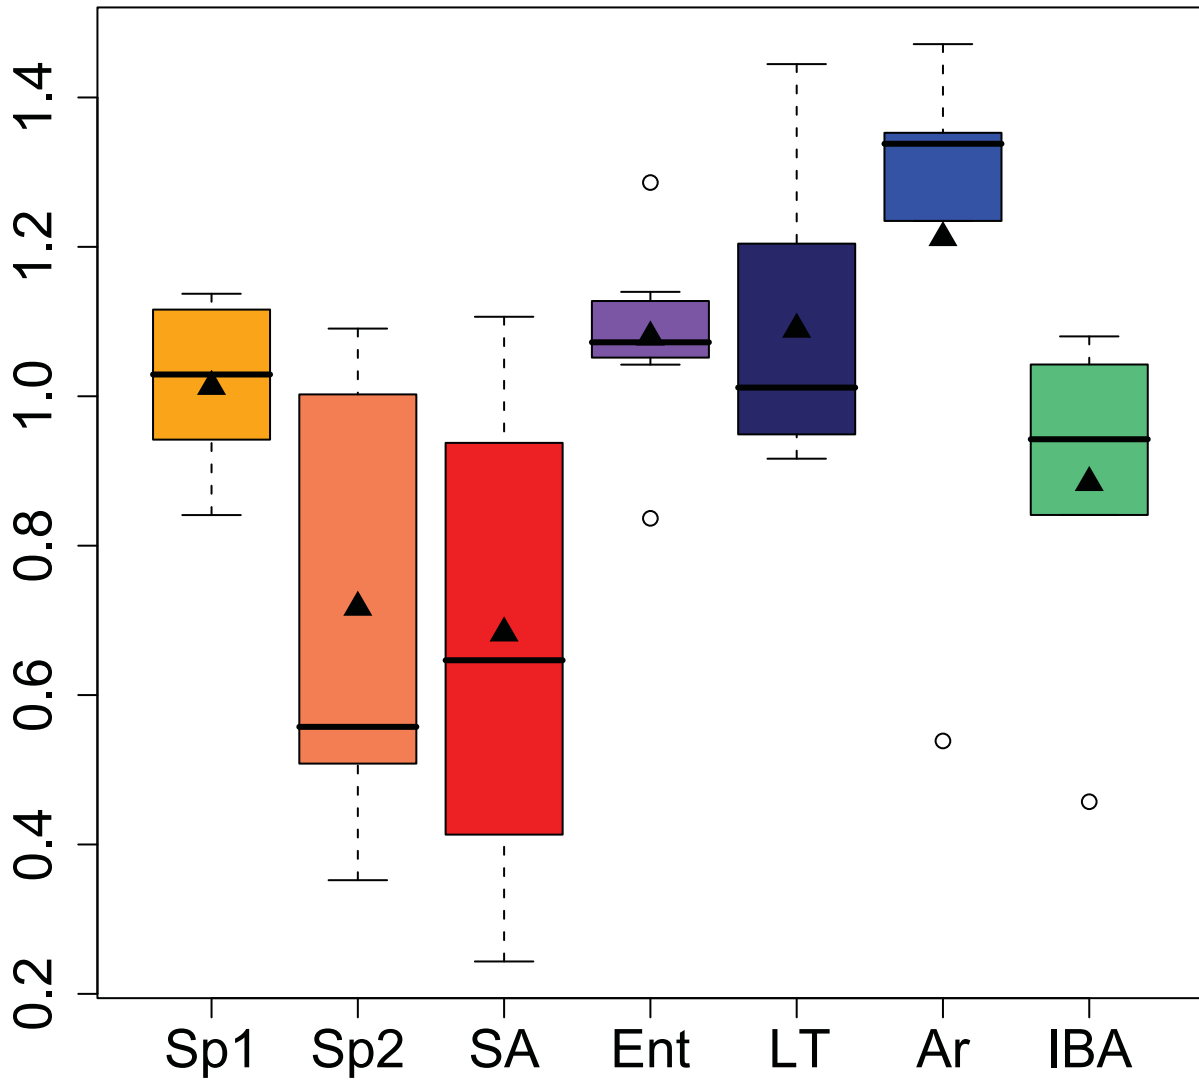

caprylate (8:0)

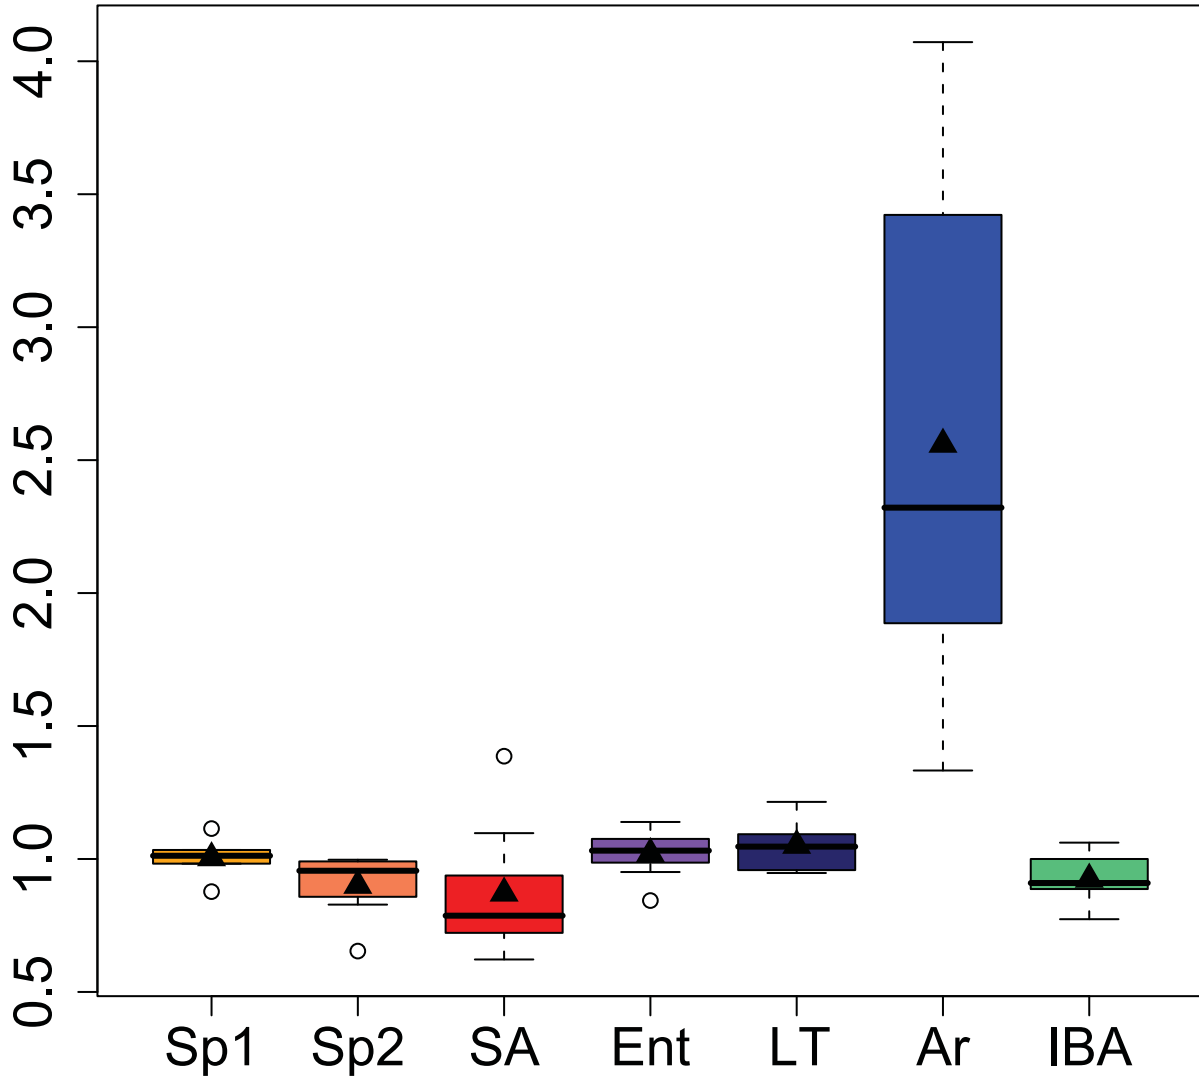

# laurate (12:0)

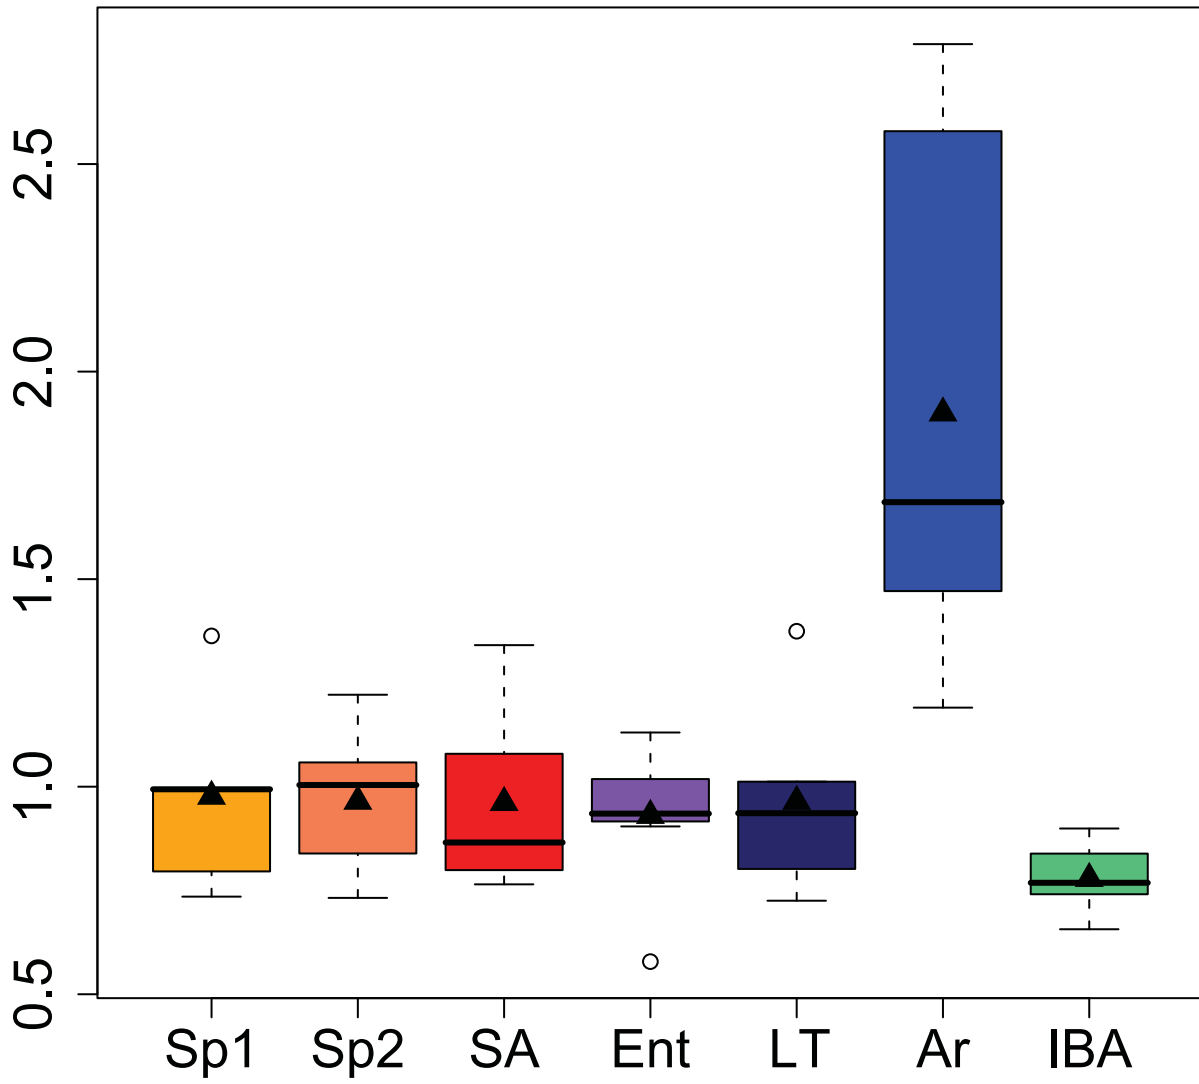

myristate (14:0)

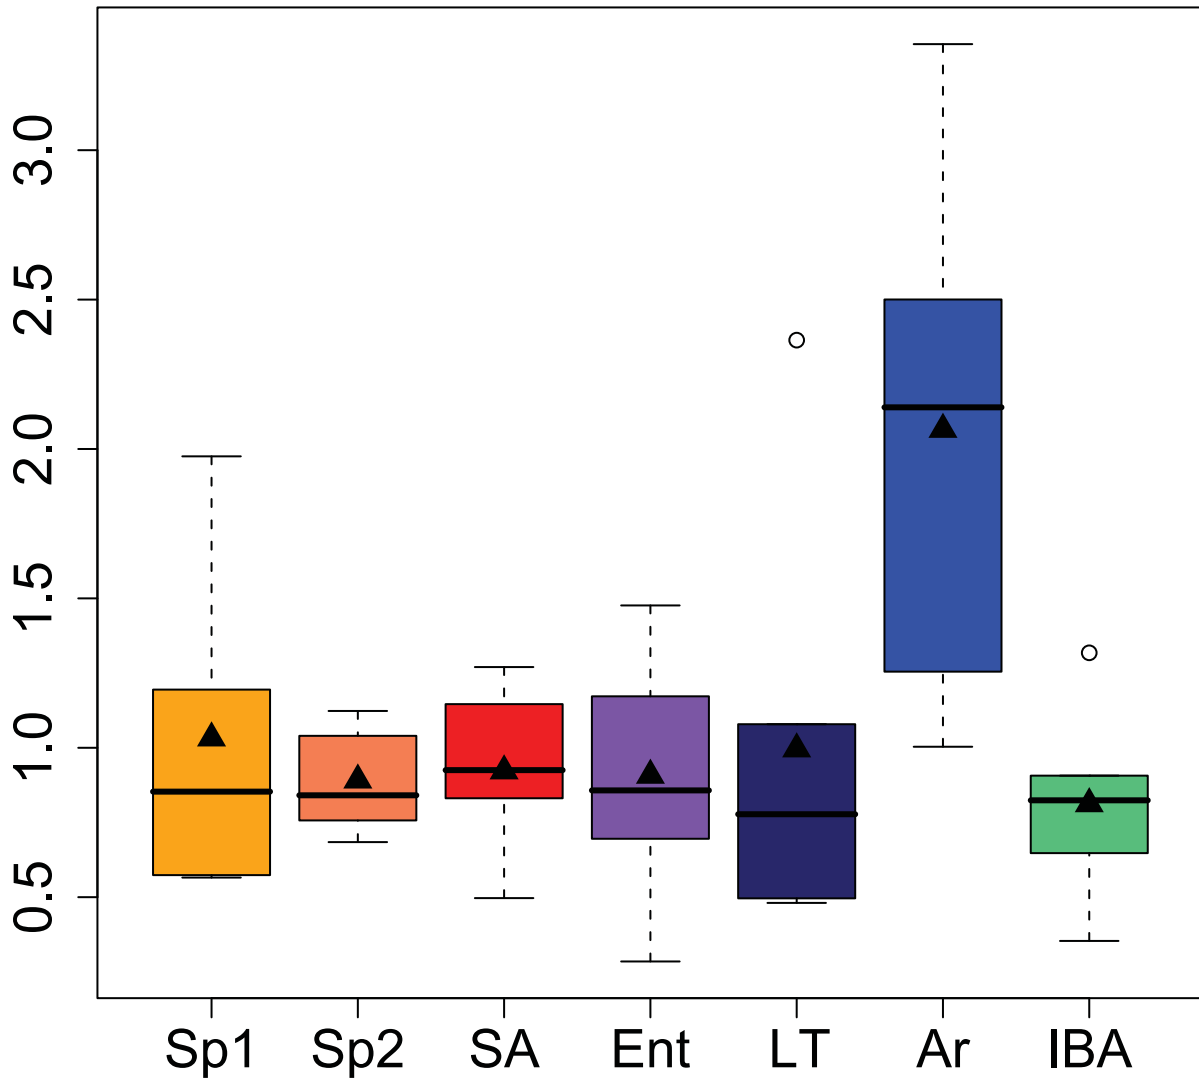

palmitate (16:0)

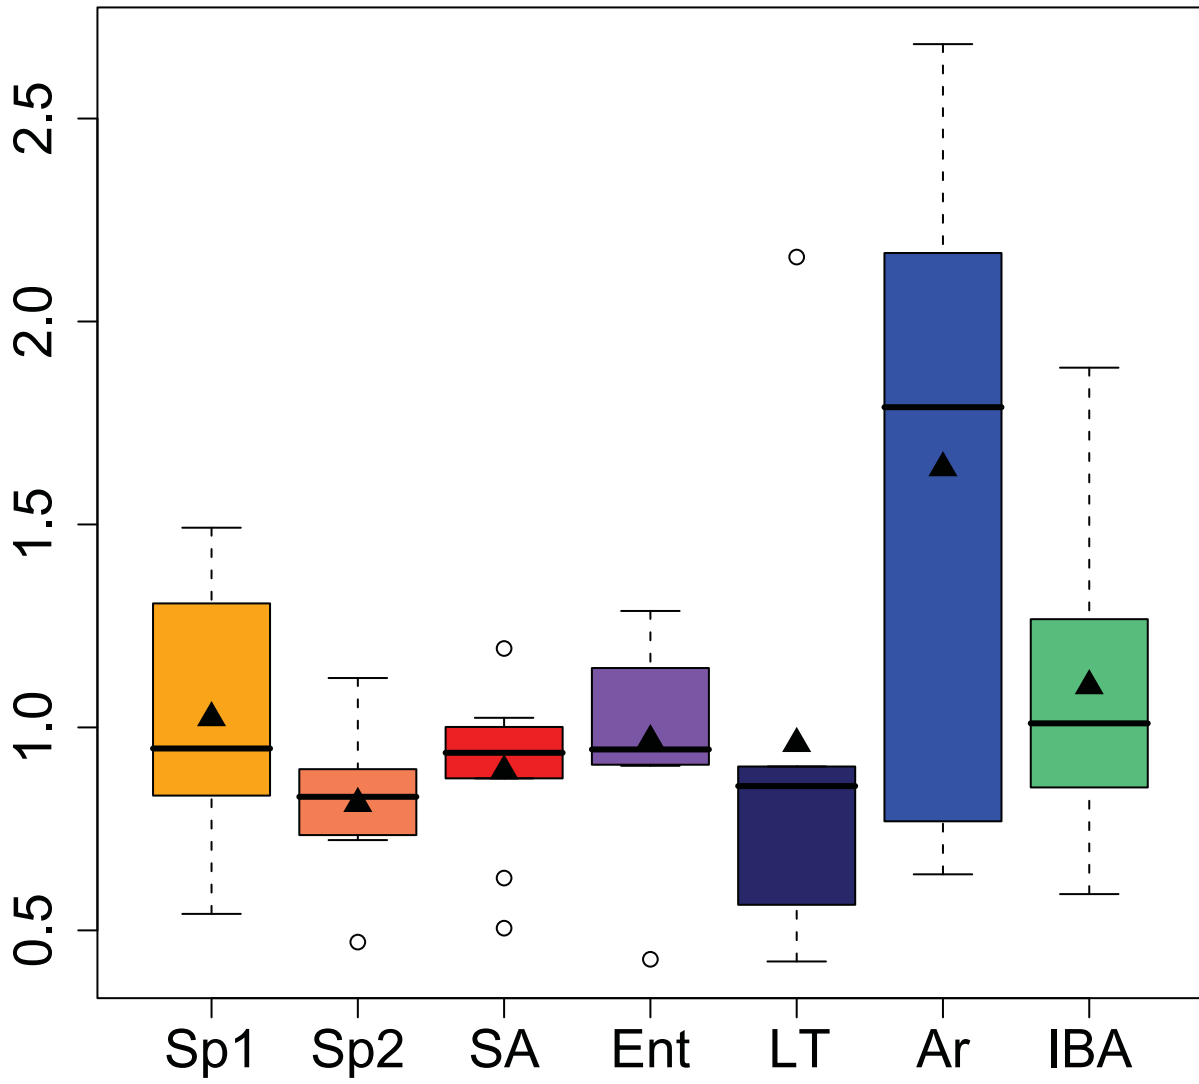

stearate (18:0)

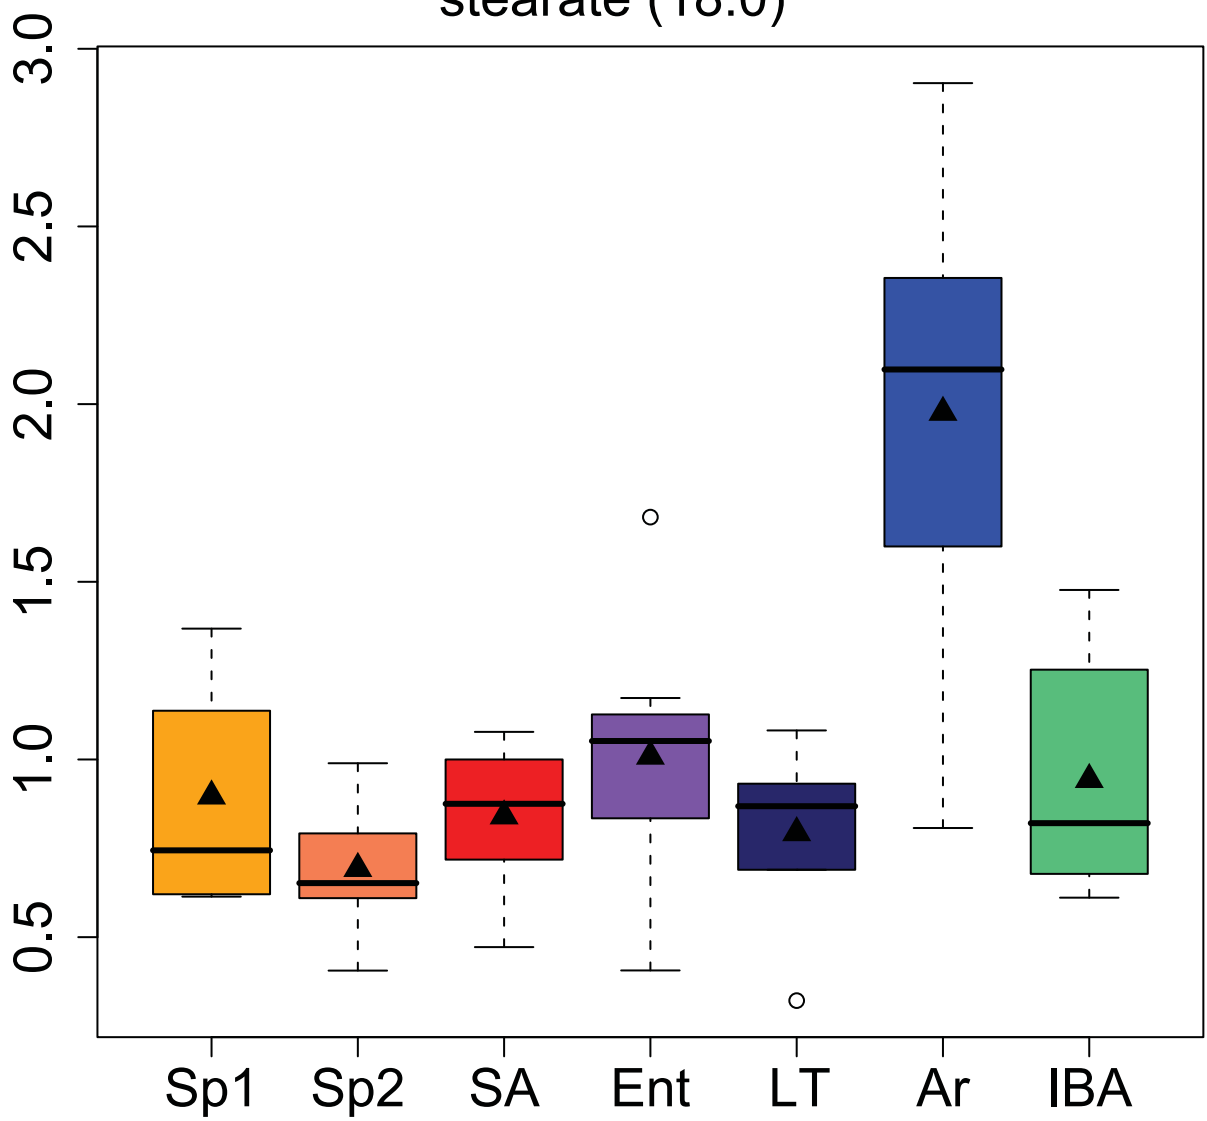

# methyl-palmitate

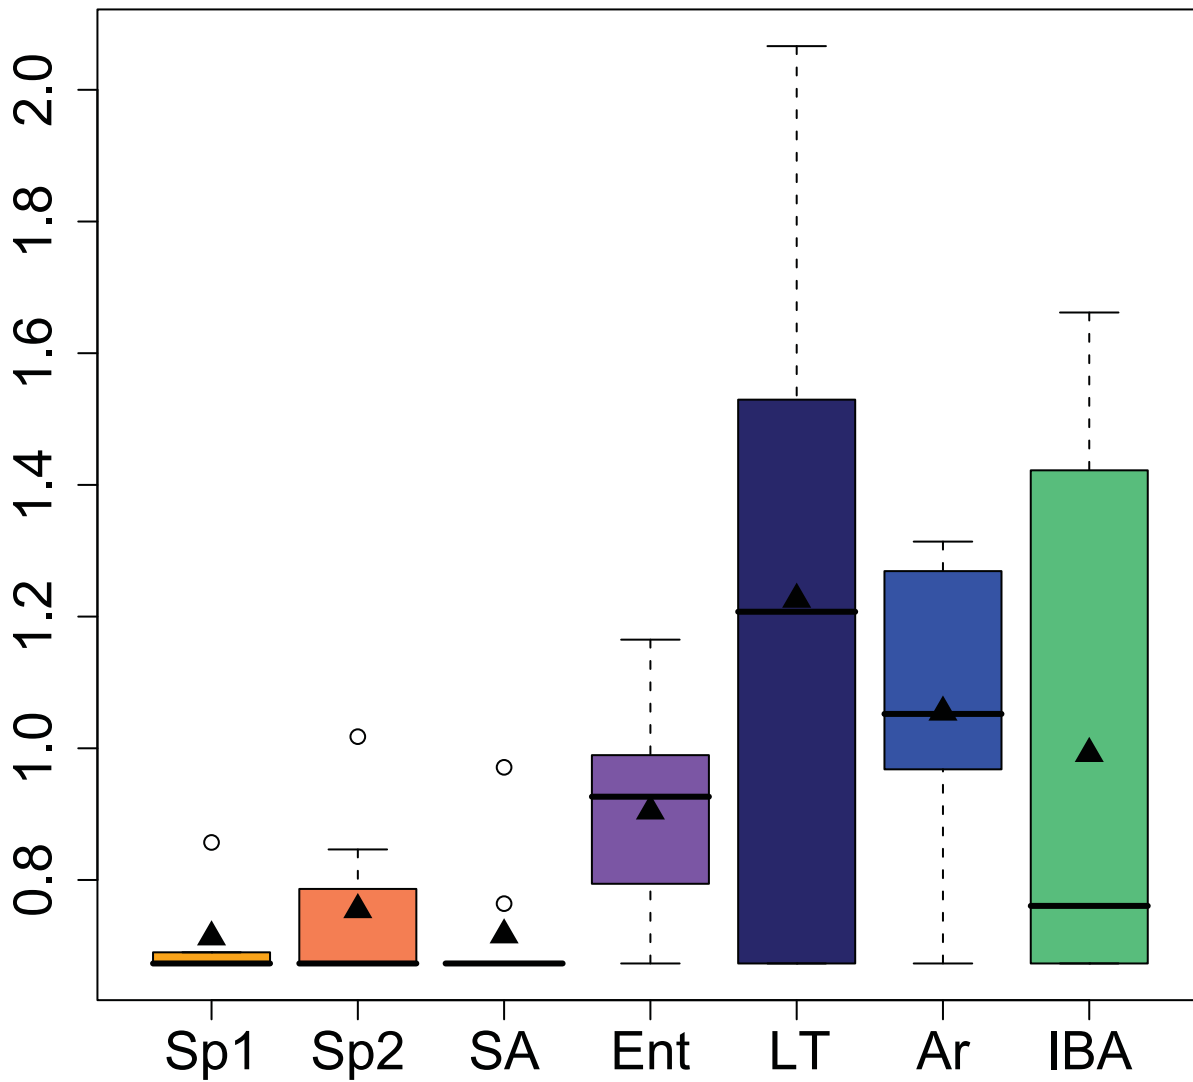

# 2-hydroxypalmitate

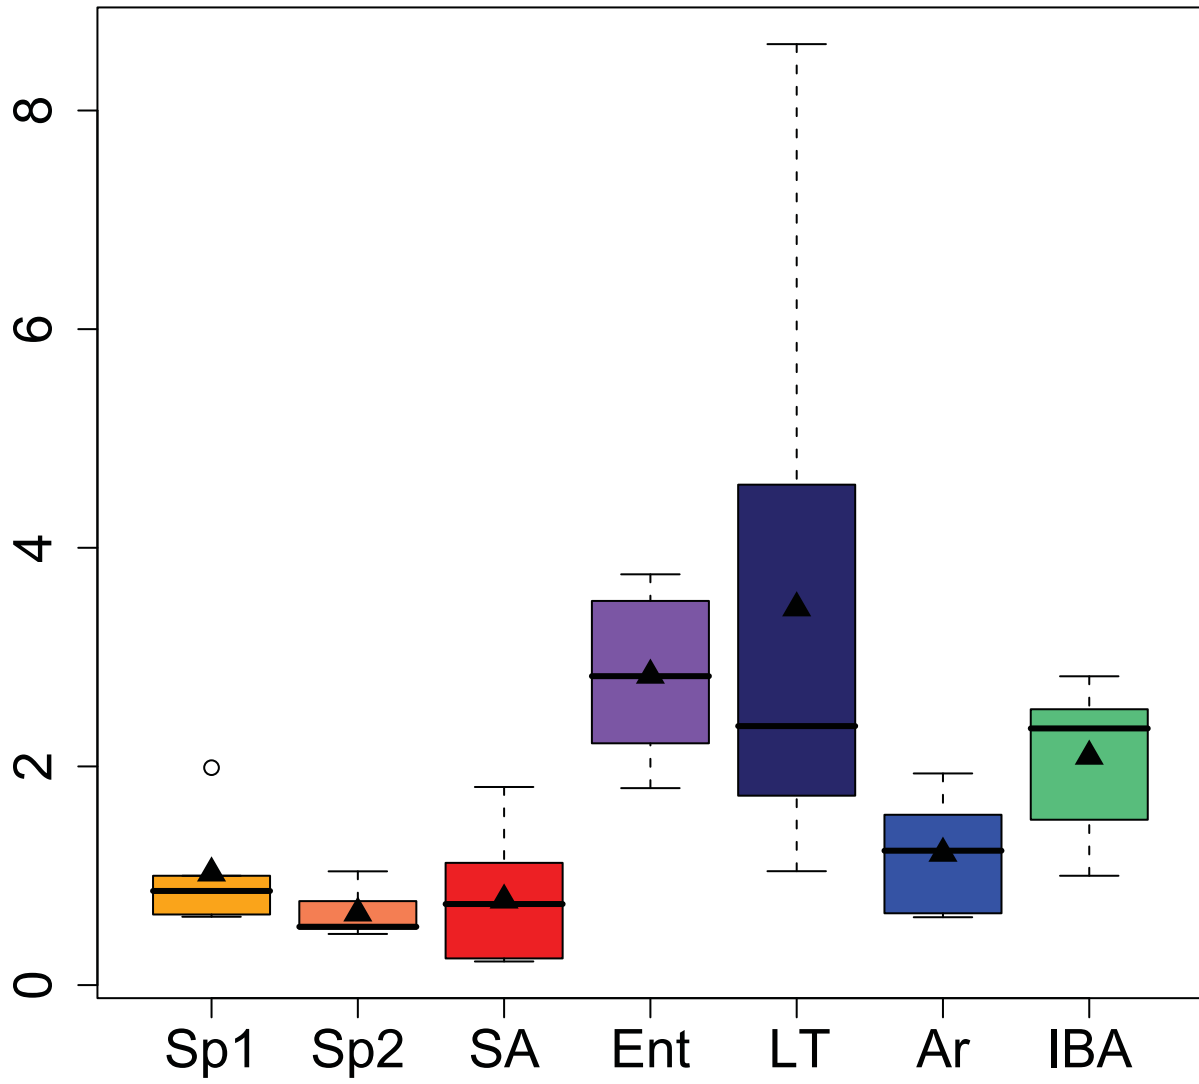



# 2-hydroxystearate

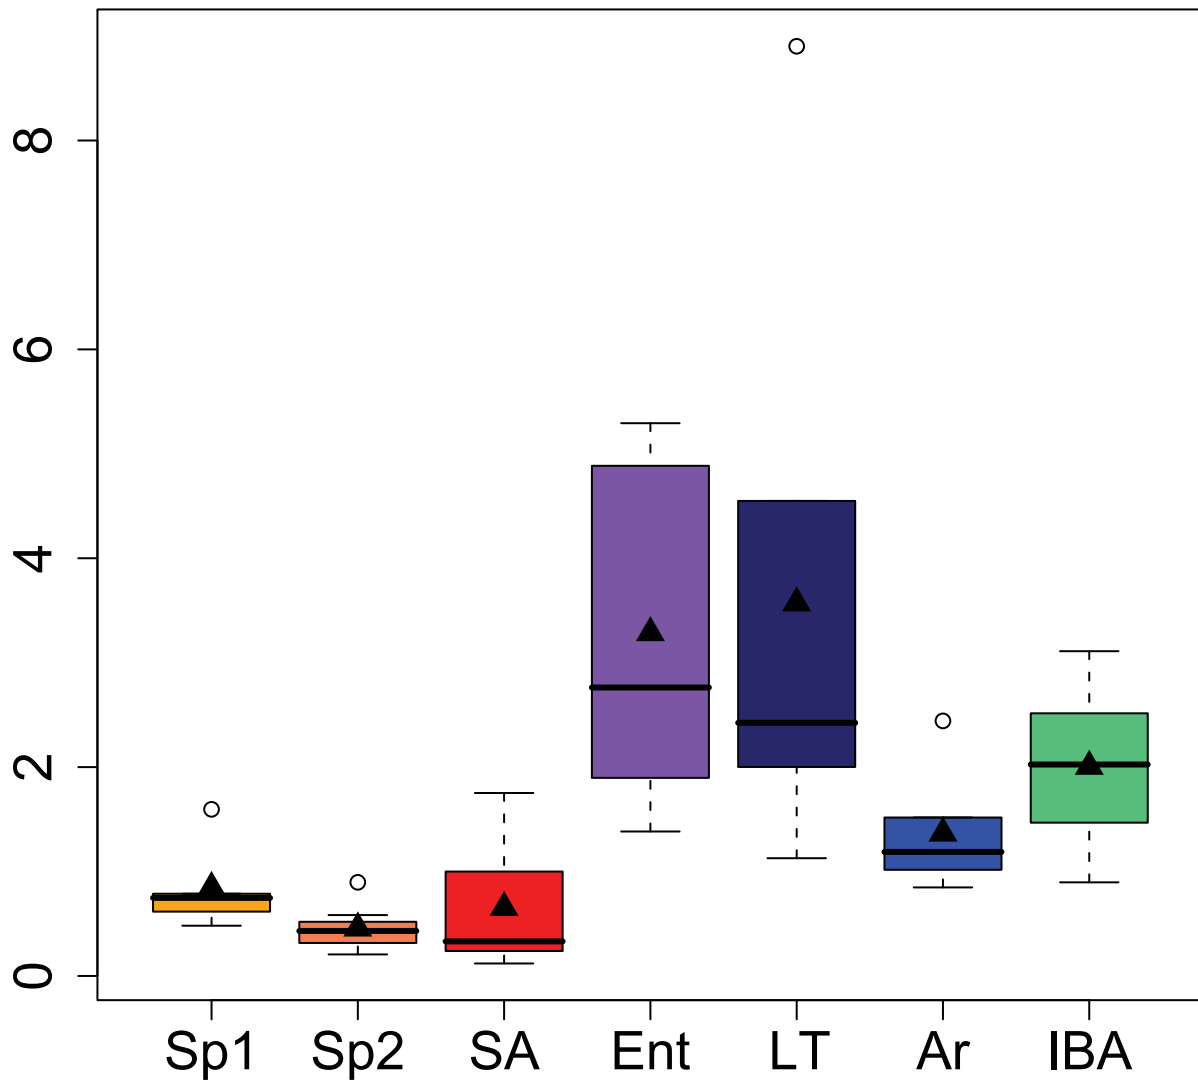

### 3-hydroxydecanoate

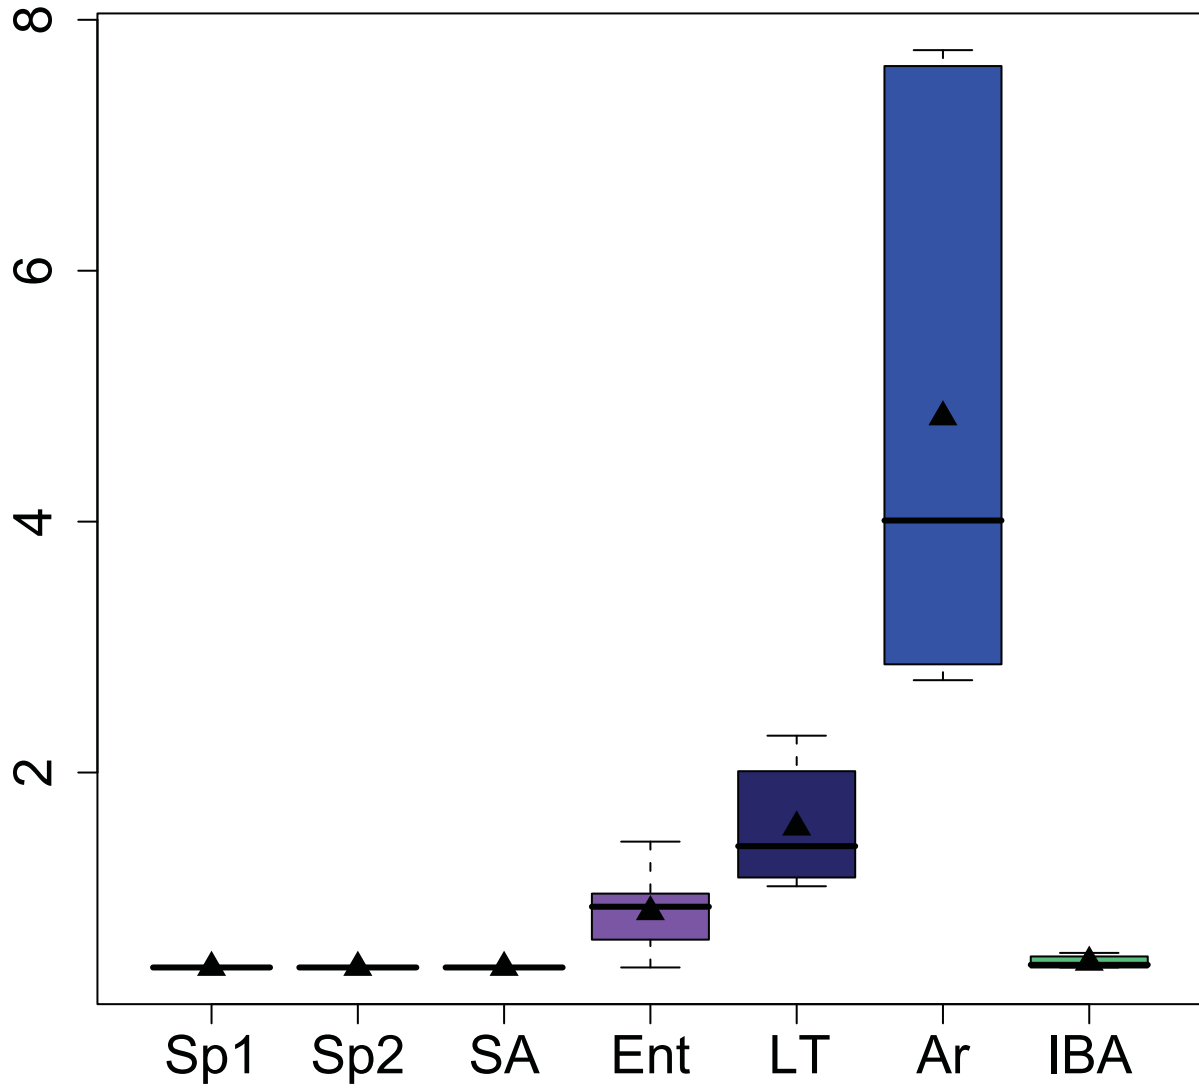

# heptanoate (7:0)

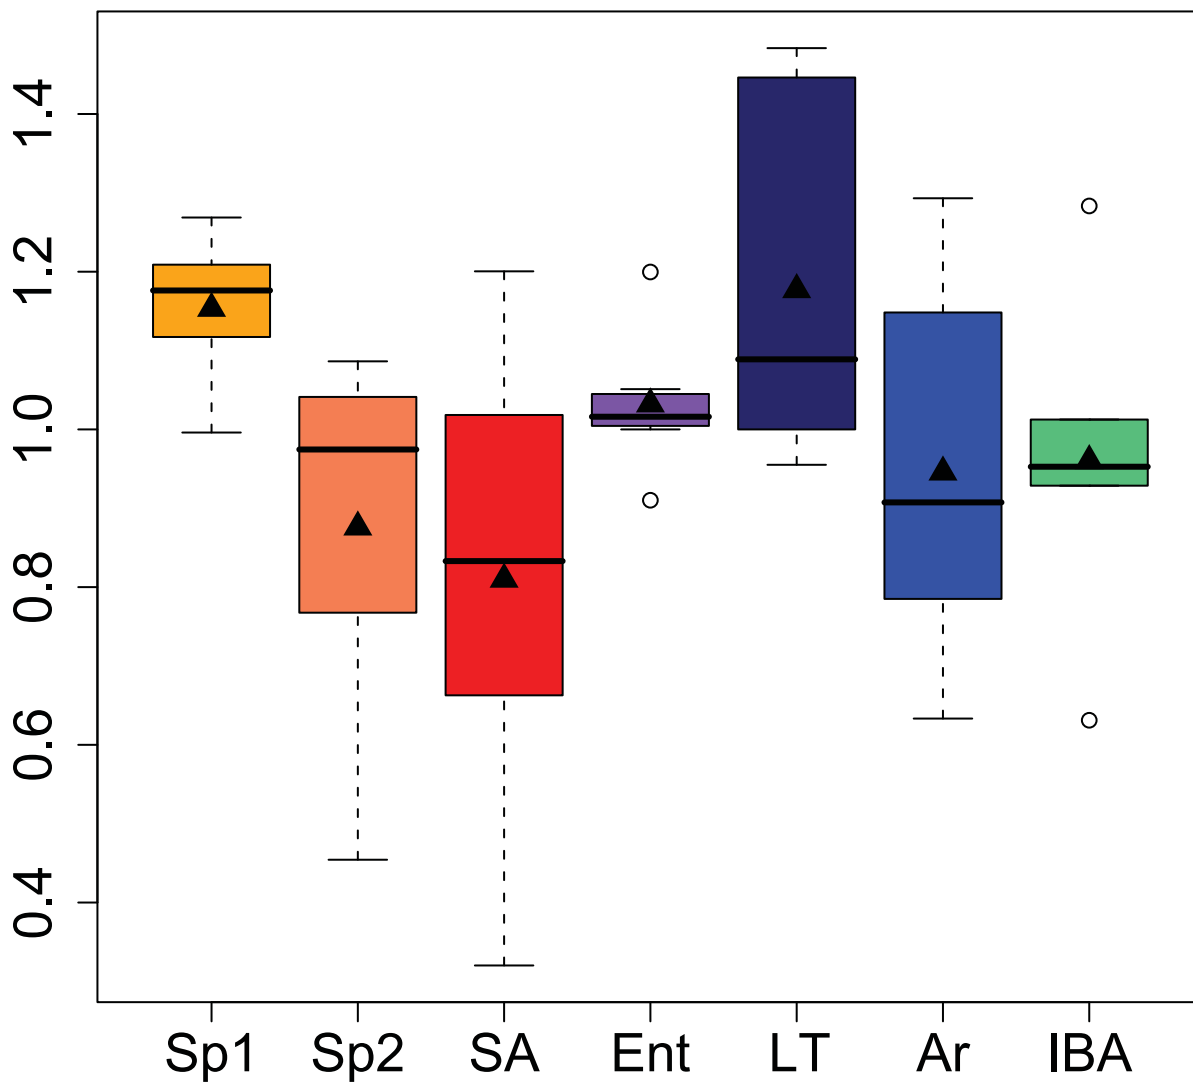

margarate (17:0)

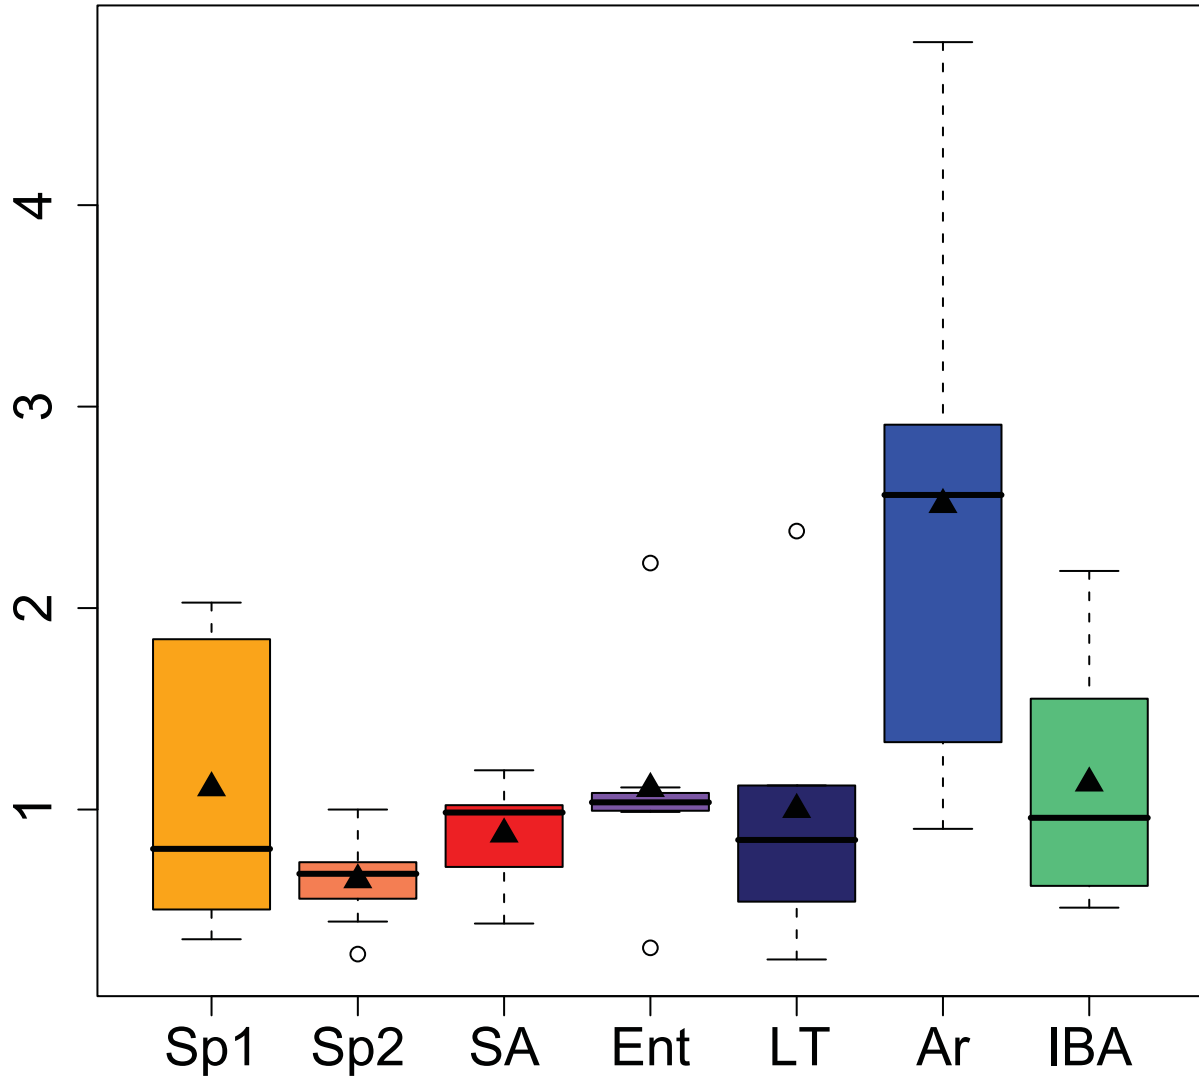

pelargonate (9:0)

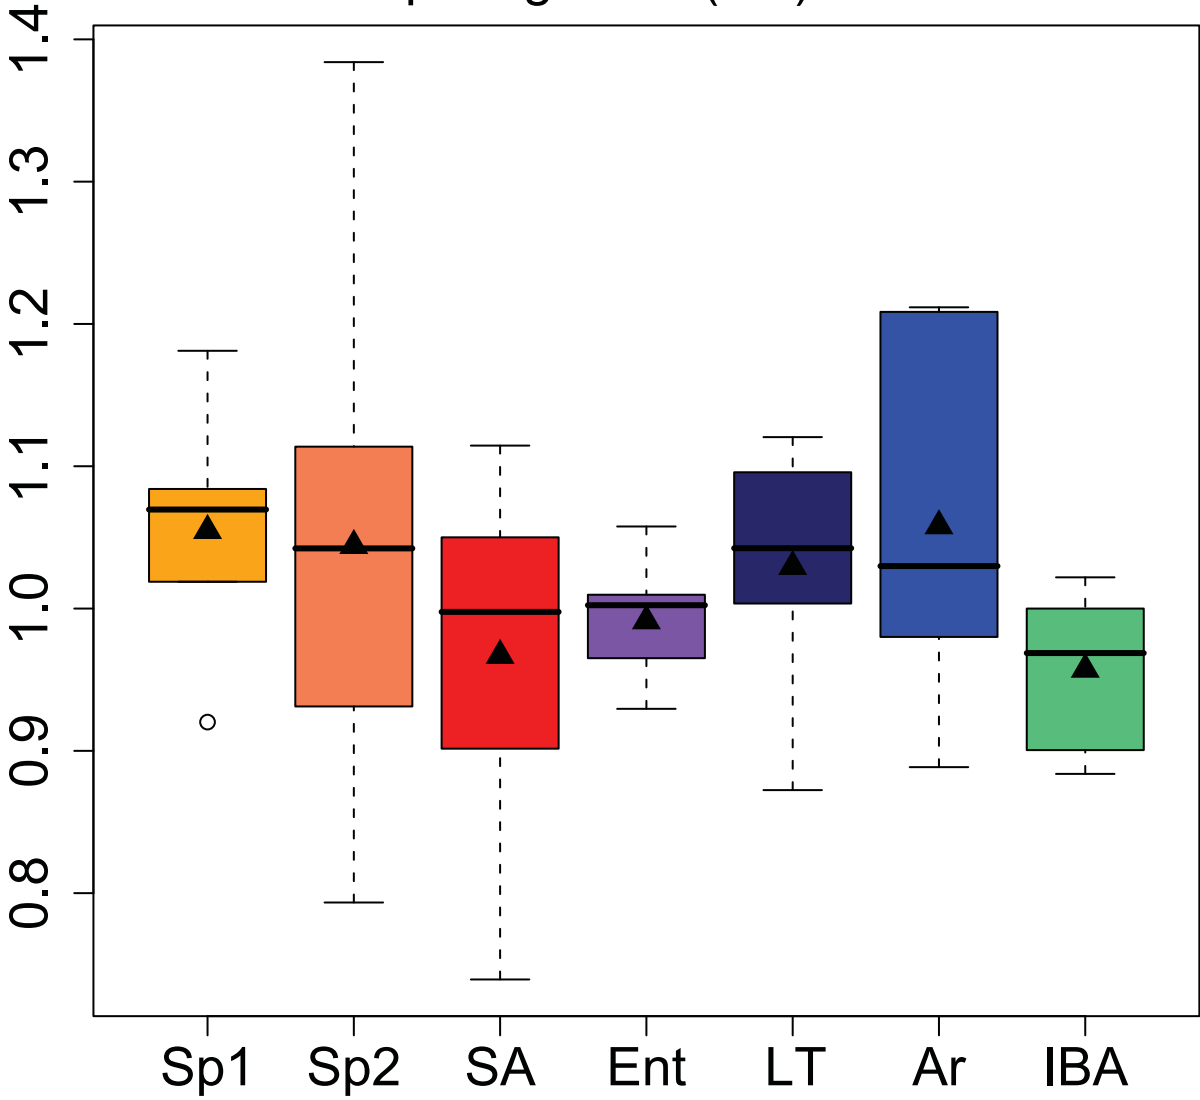

# undecanoate (11:0)

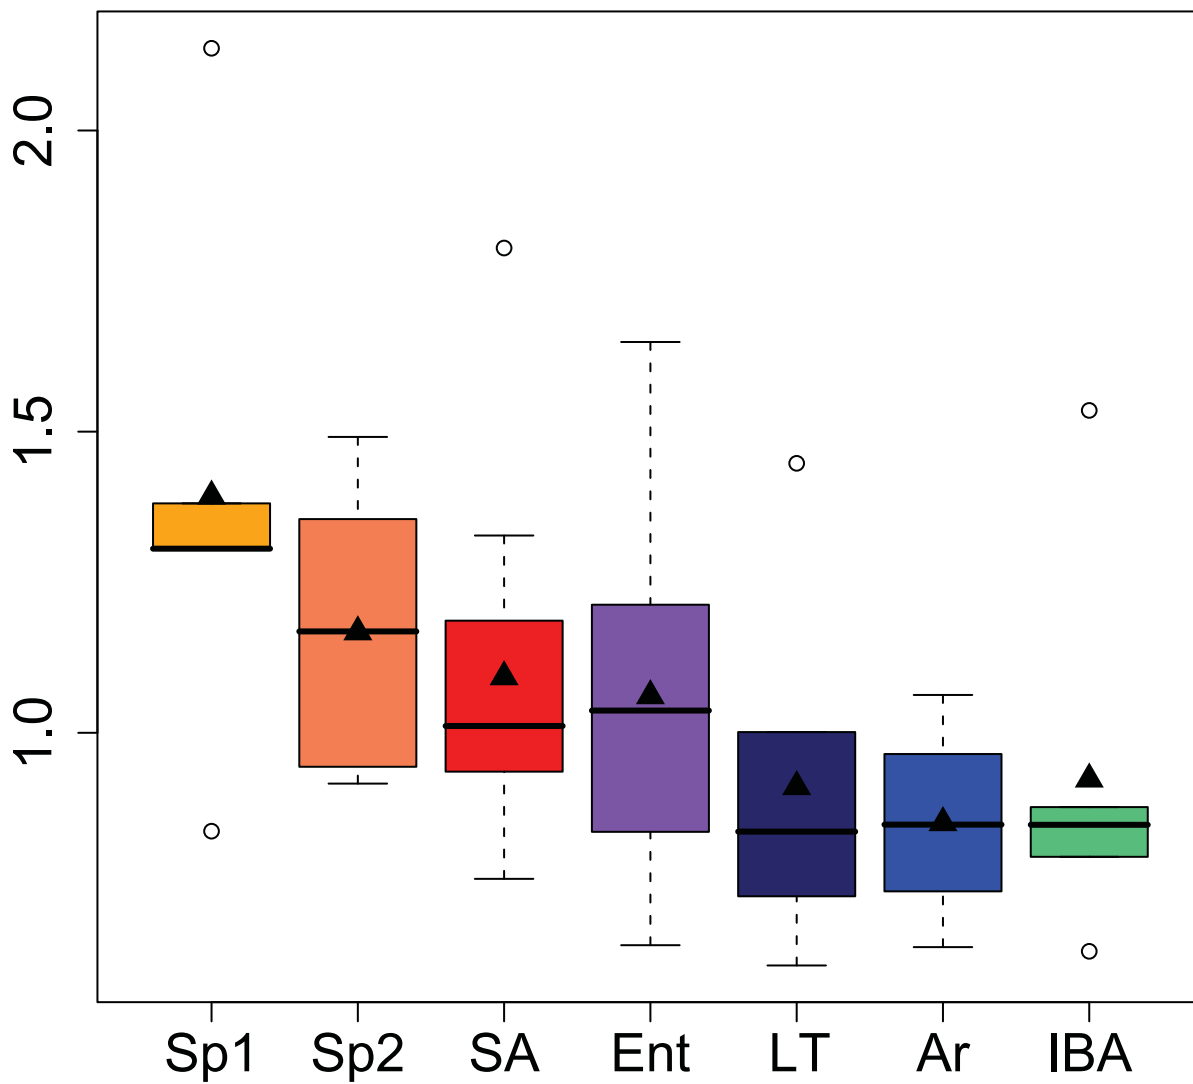

# valerate

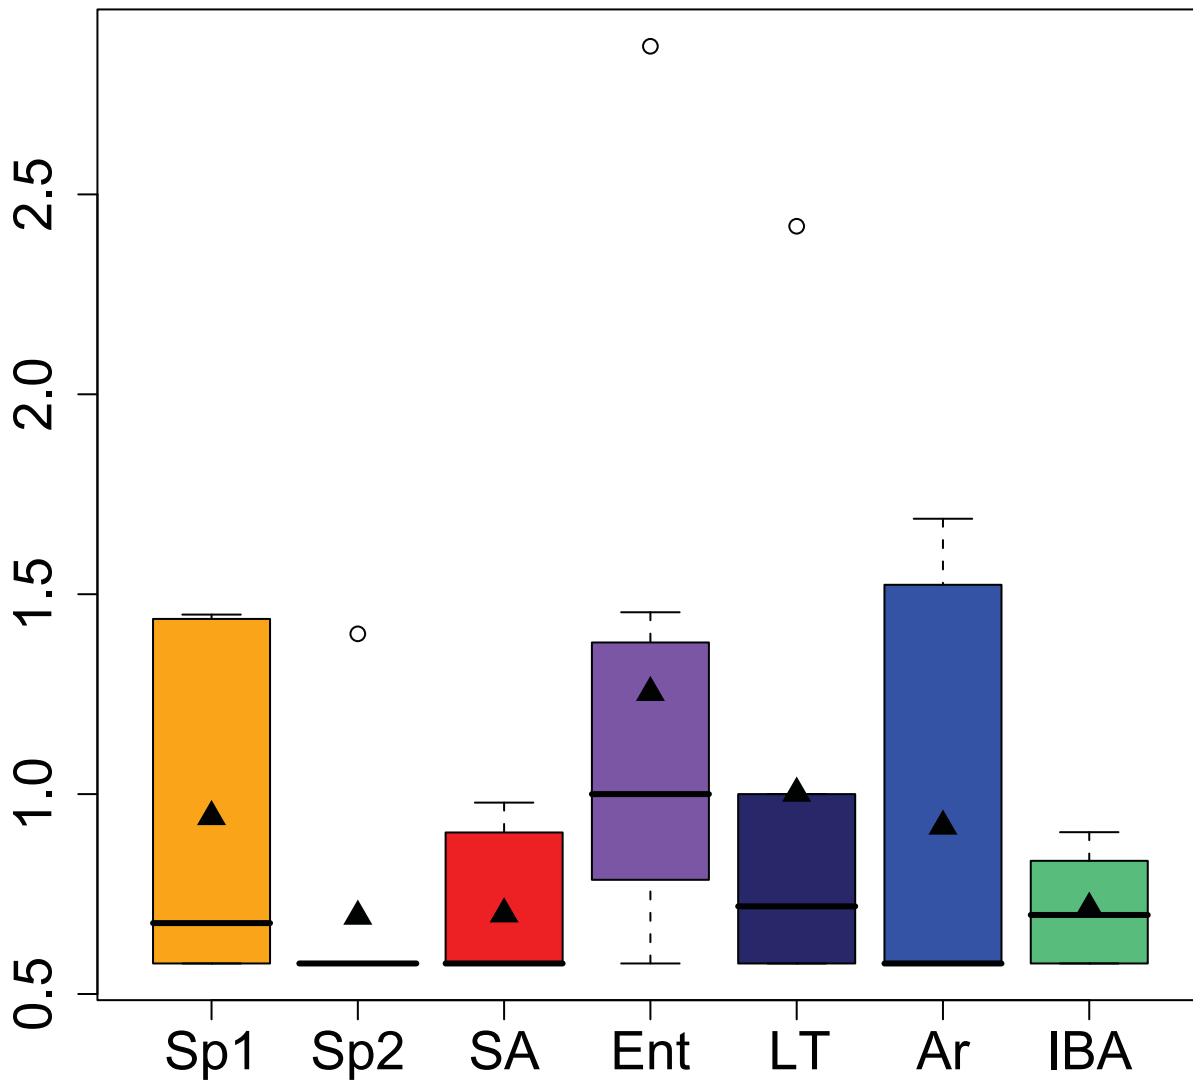

# 1,3-dipalmitoylglycerol

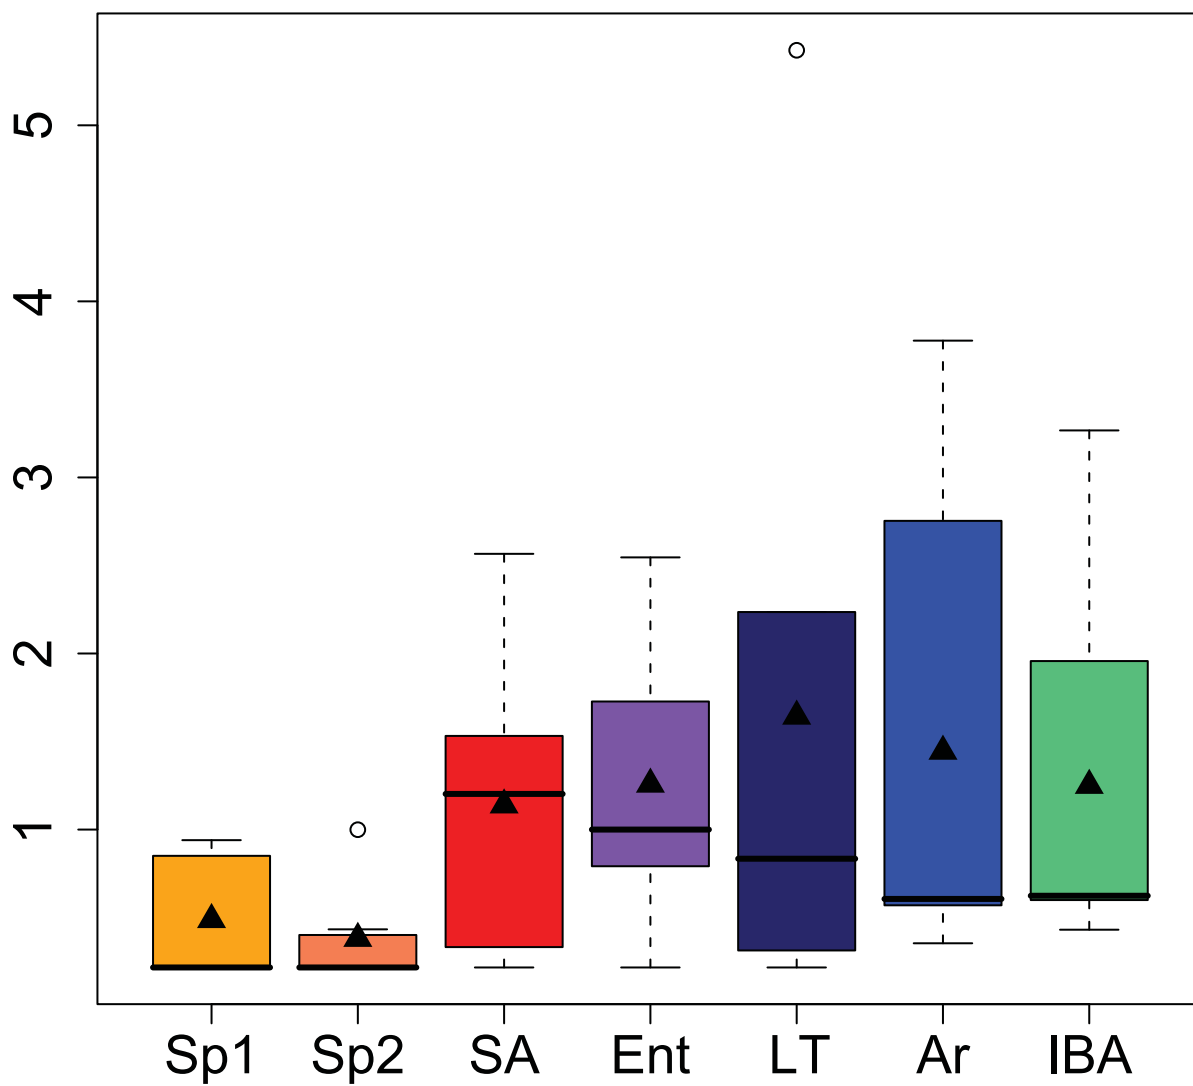



1-arachidonoylglycerophosphocholine\*

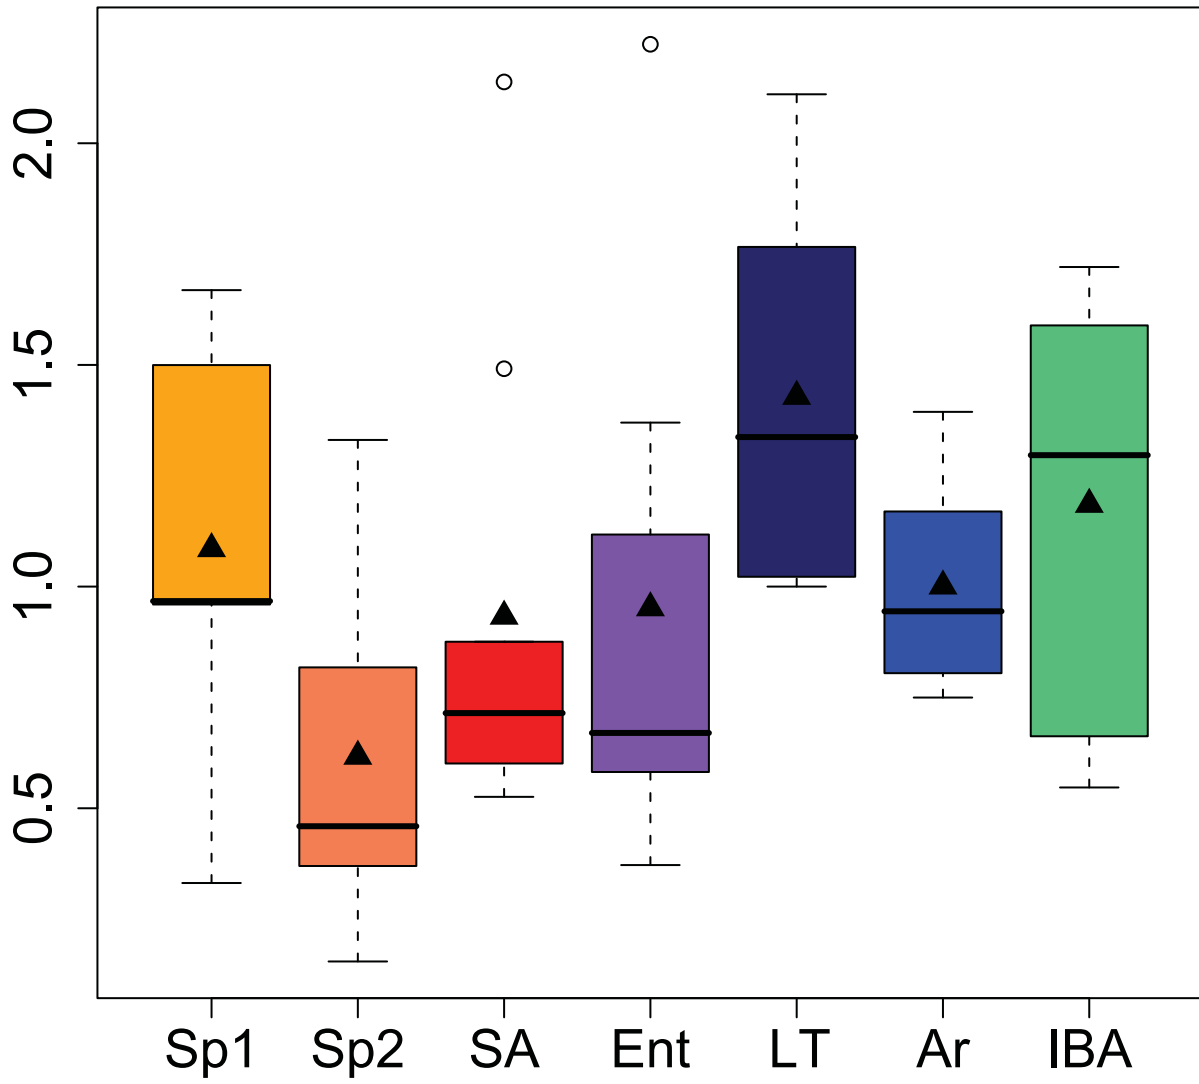

# 1-arachidonoylglycerophosphoethanolamine-

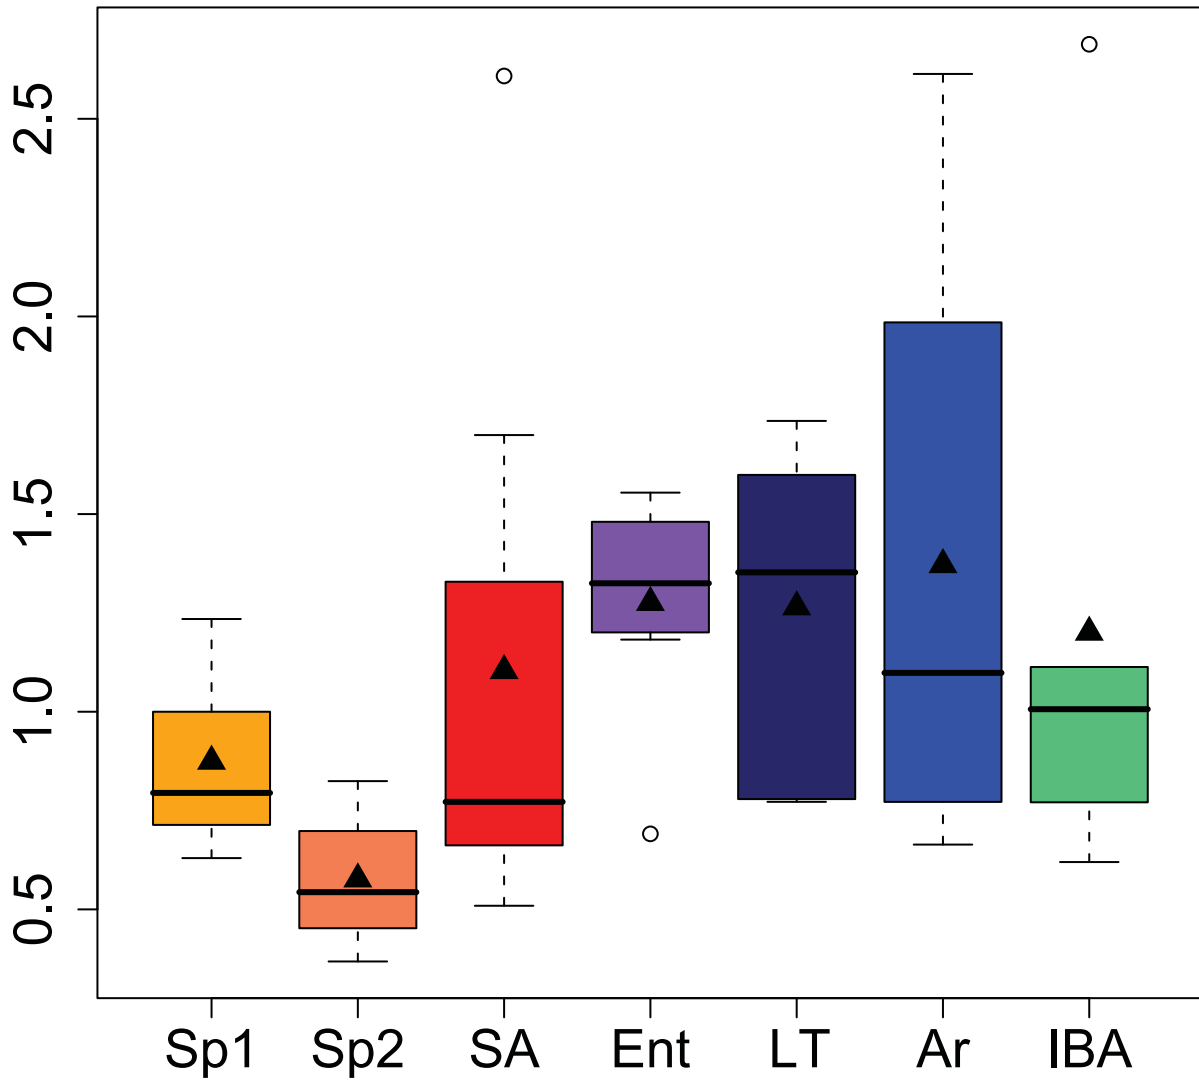

# 1-arachidonoylglycerophosphoinositol-

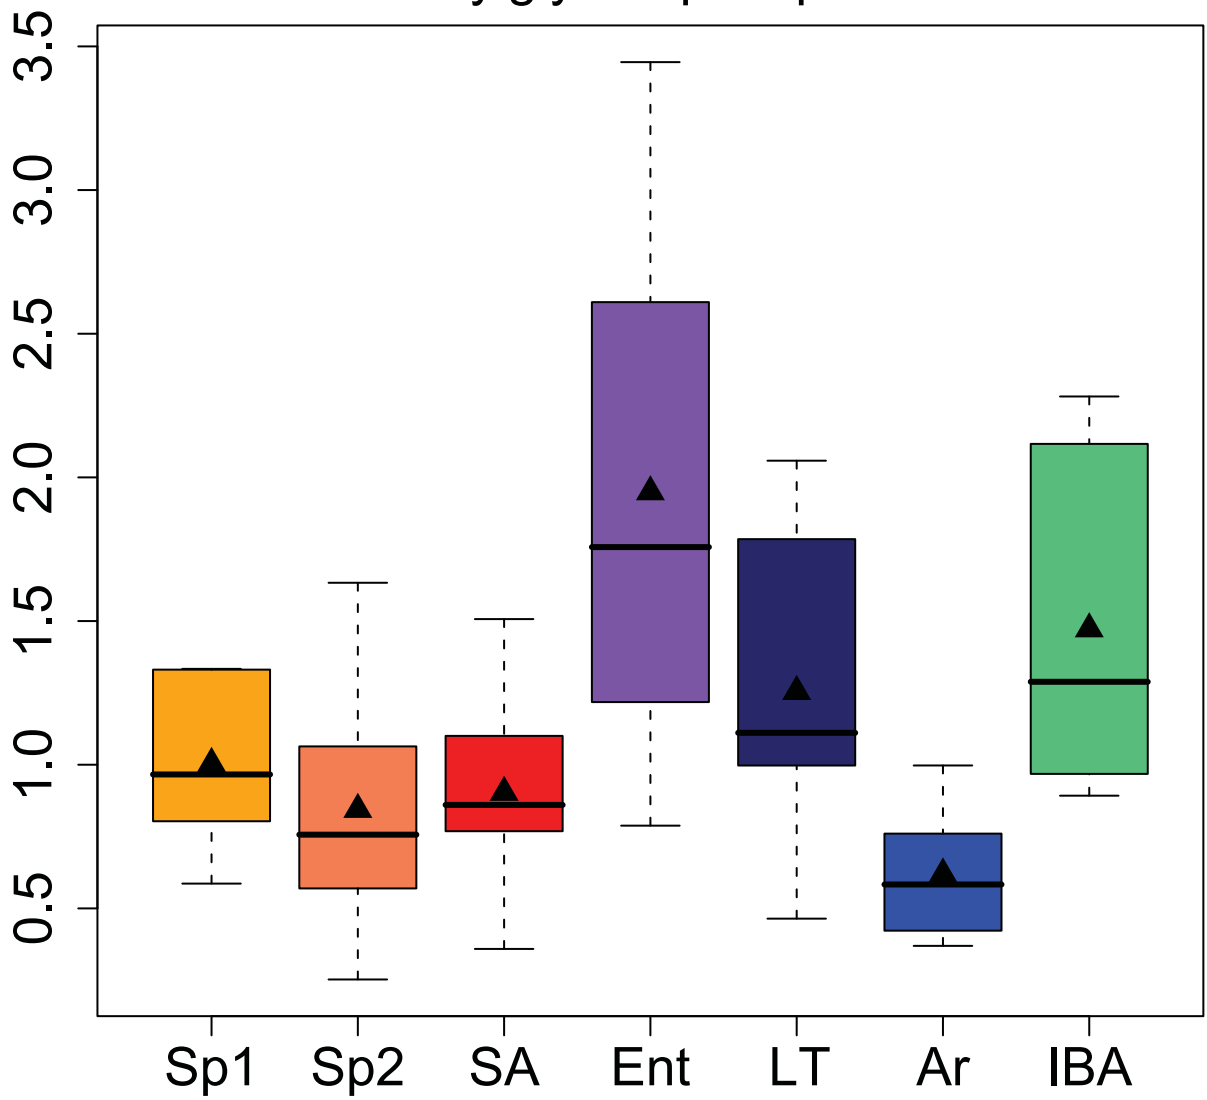

# 1-arachidoylglycerophosphocholine

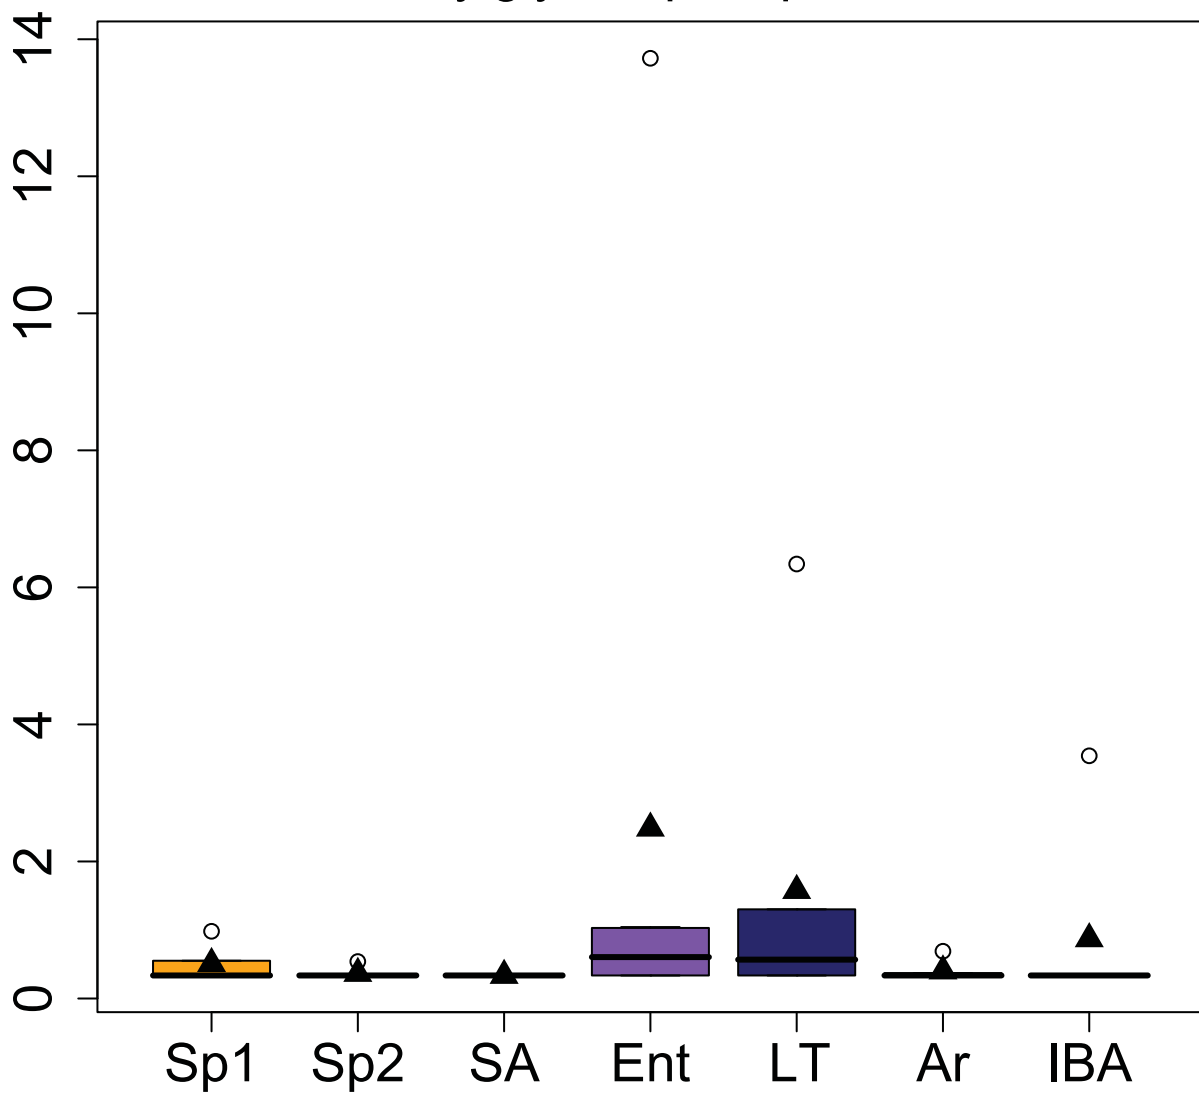

# 1-docosaenoylglycerophosphocholine-

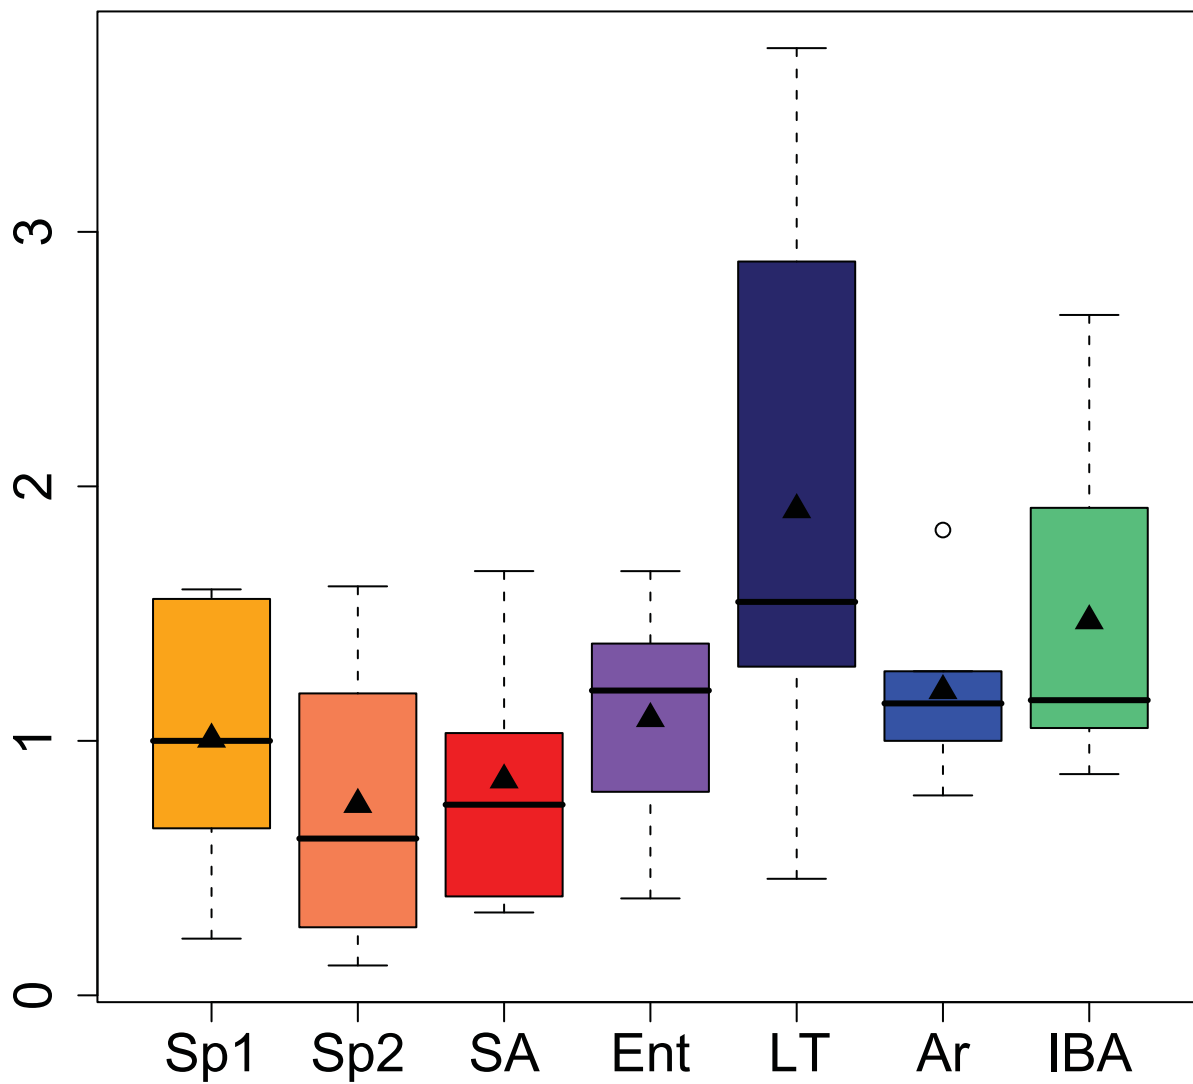

# 1-eicosatrienoylglycerophosphocholine\*

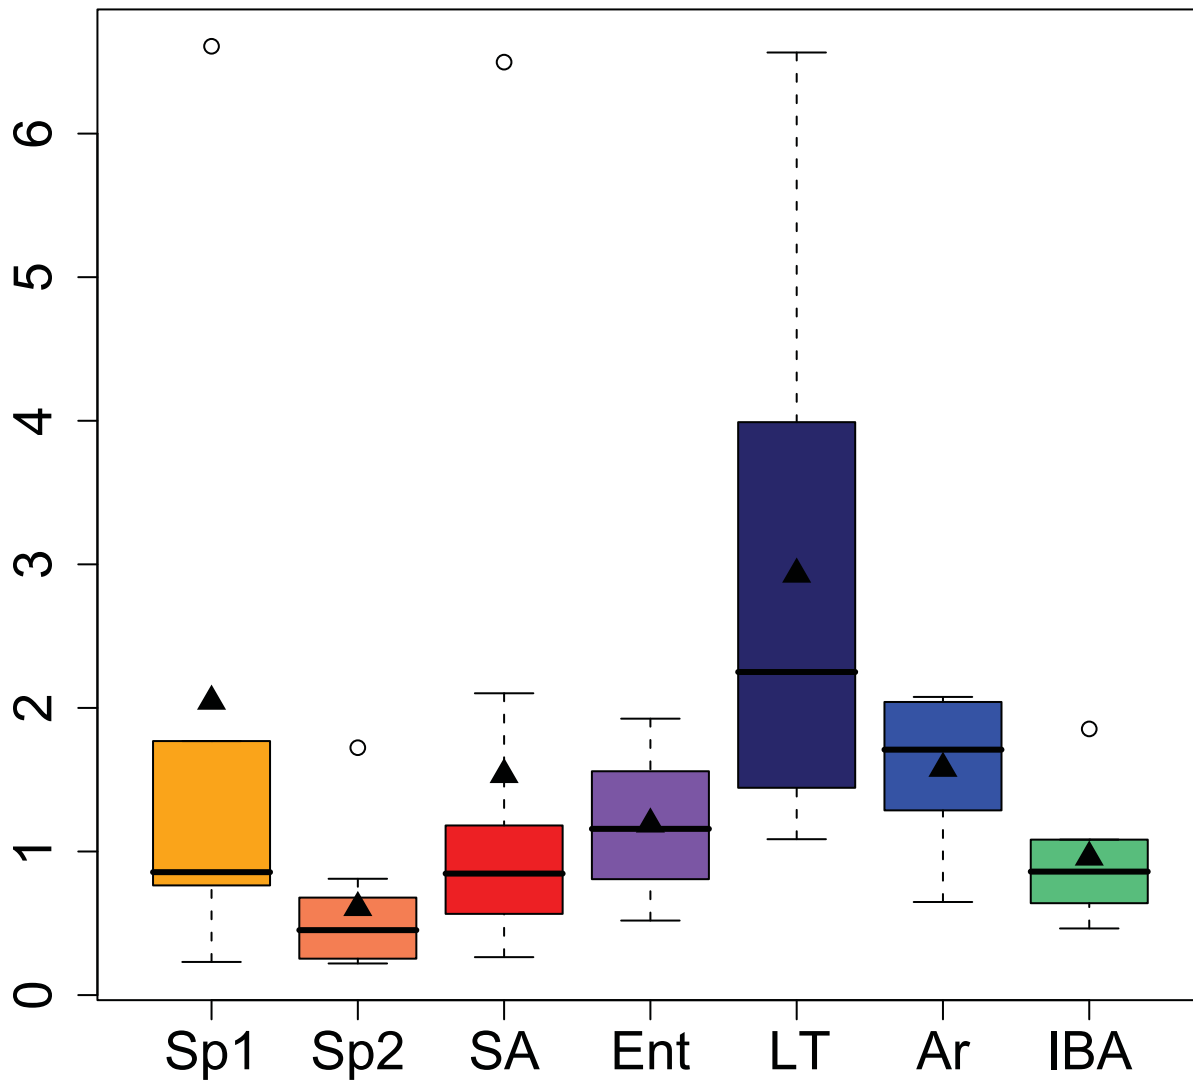

# 1-heptadecanoylglycerophosphocholine

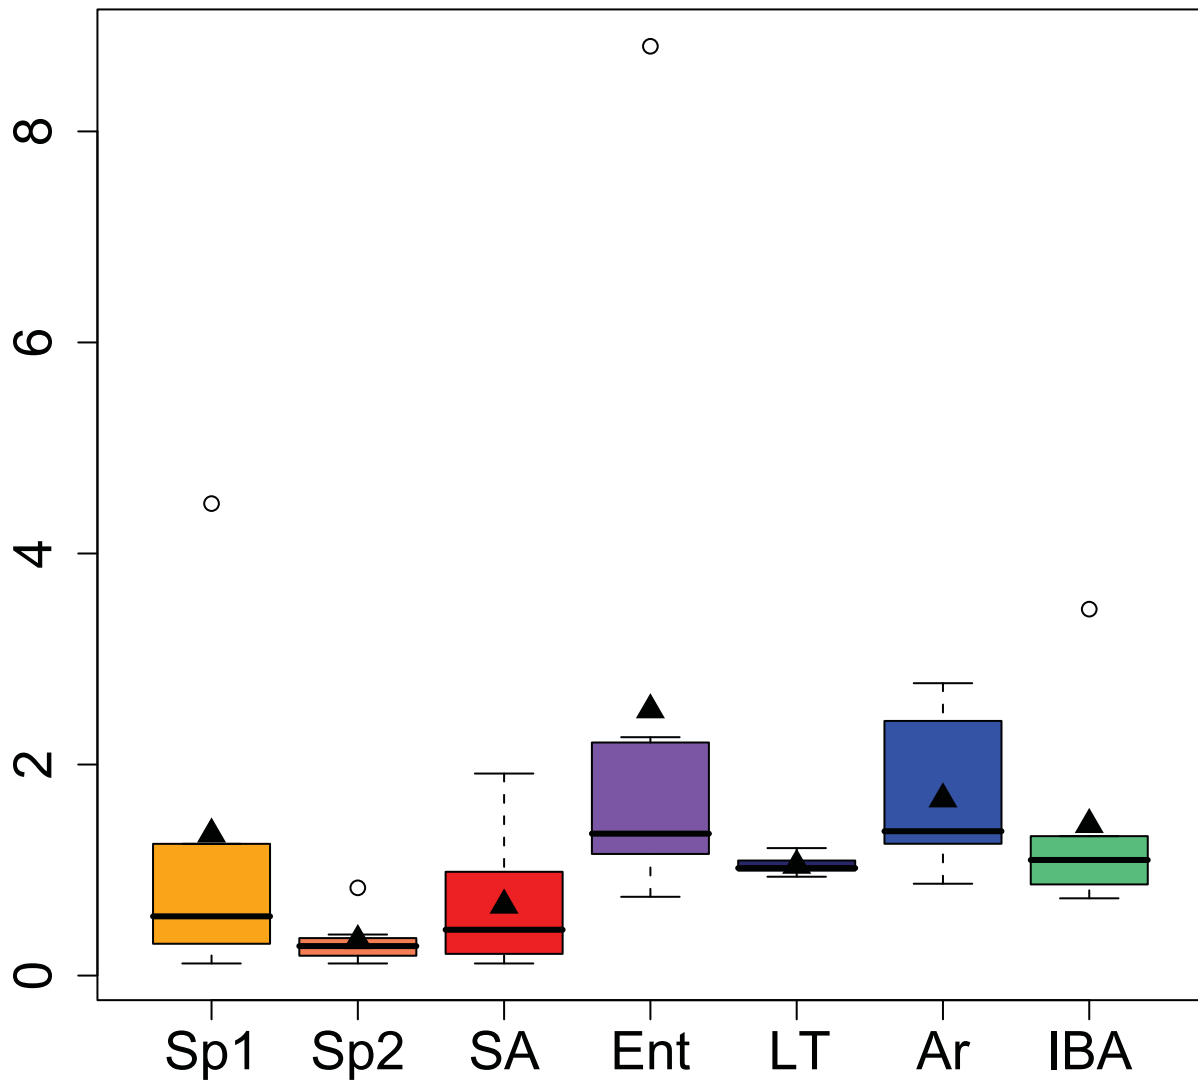

# 1-linoleoylglycerophosphocholine

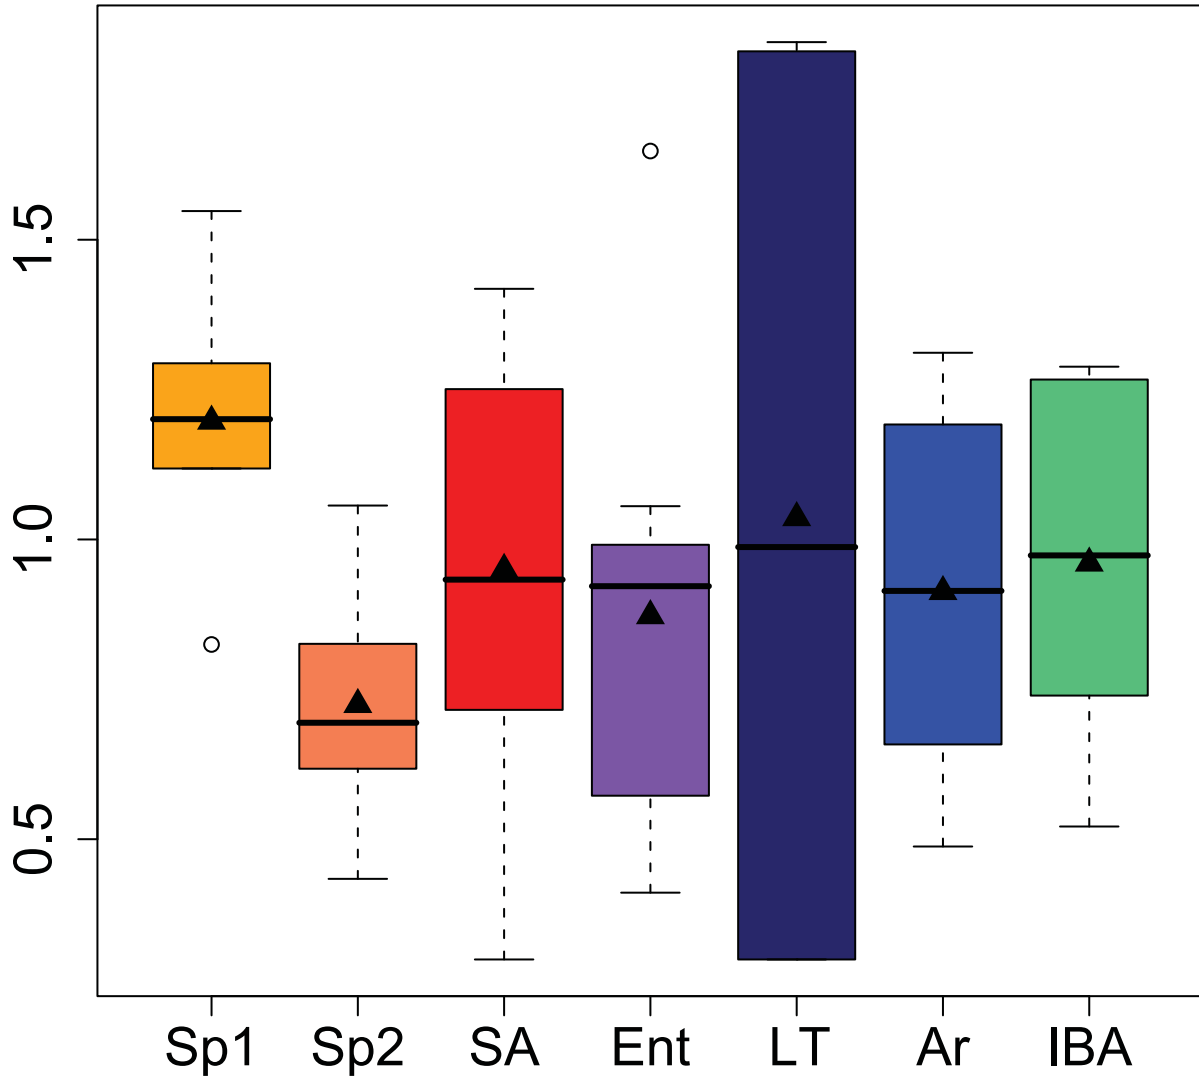



# 1-myristoylglycerophosphocholine

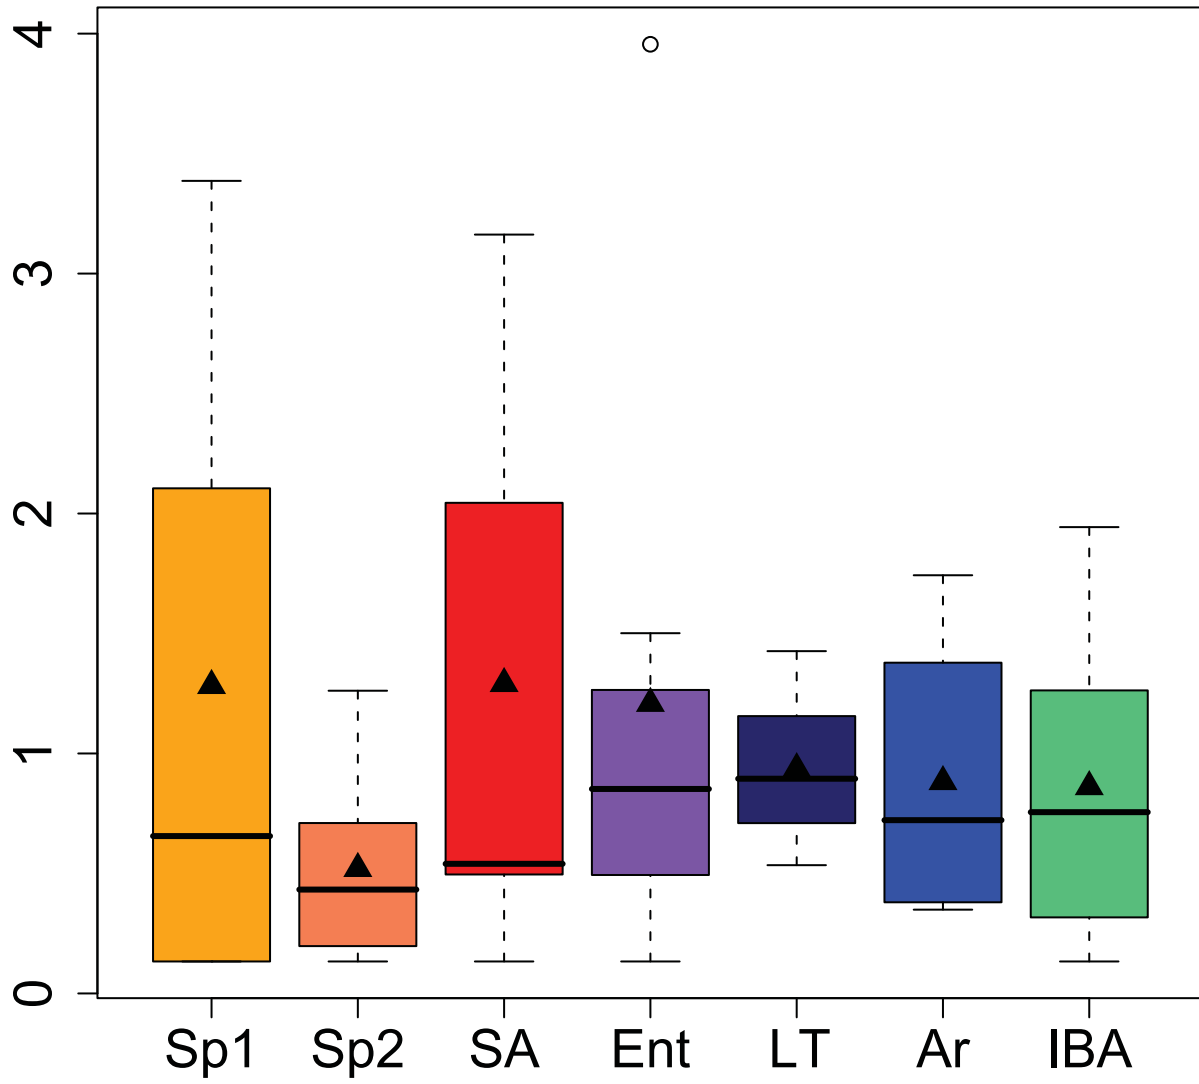

# 1-oleoylglycerophosphocholine

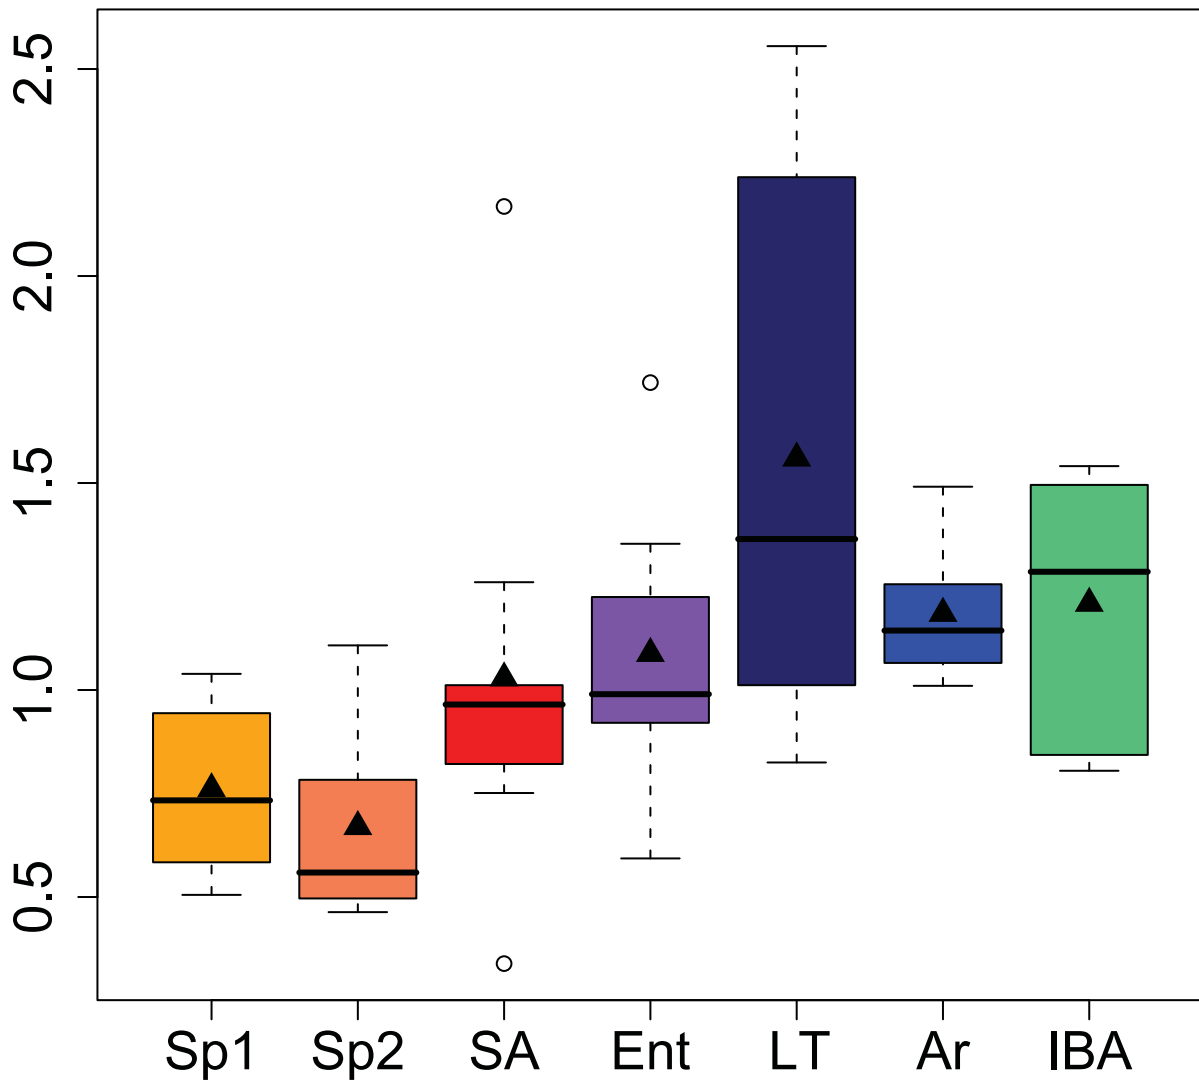

# 1-oleoylglycerophosphoethanolamine

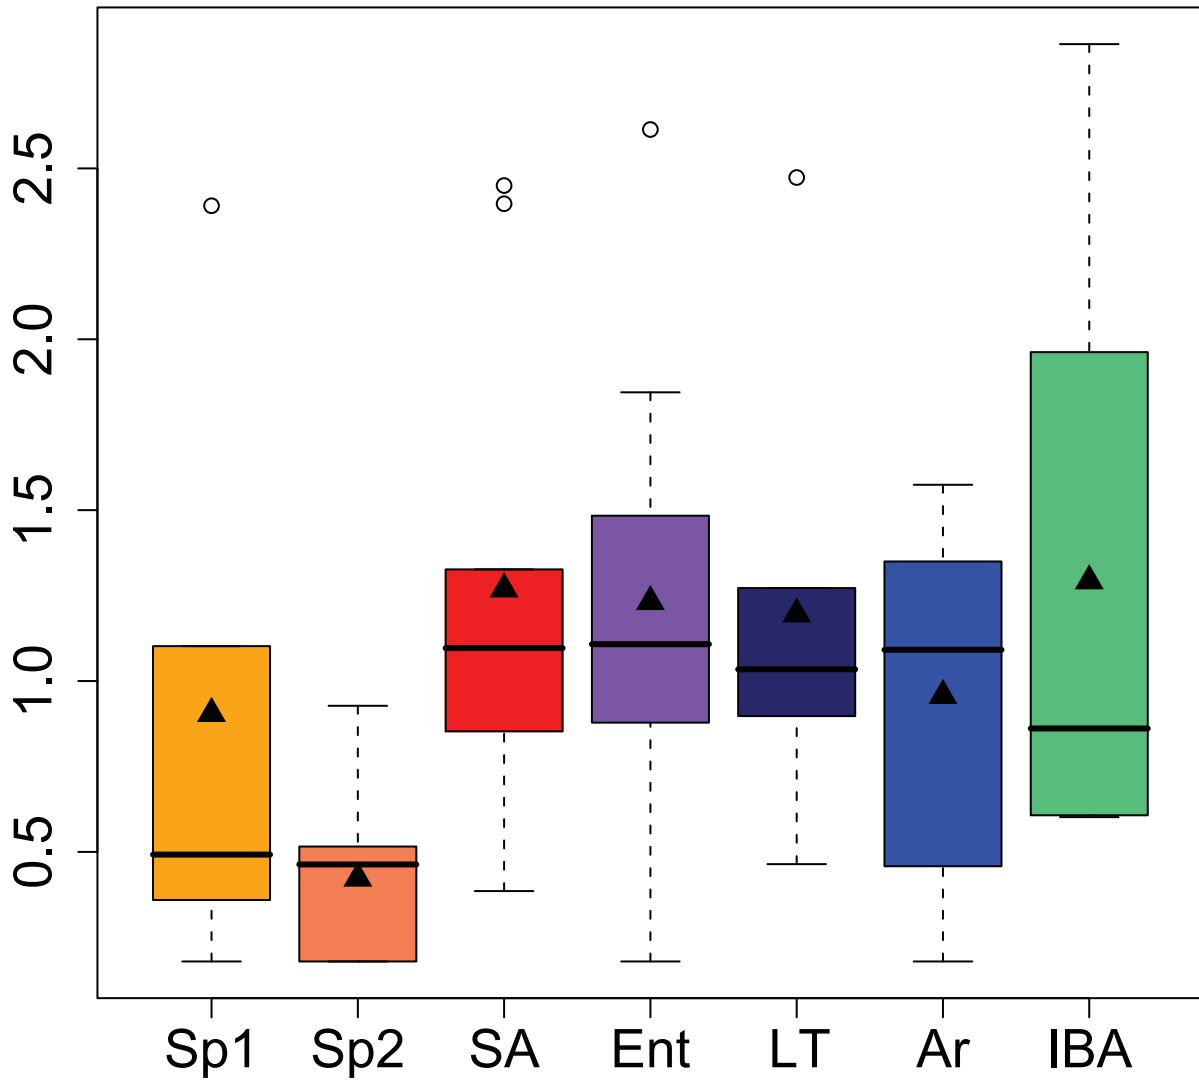

# 1-palmitoleoylglycerophosphocholine\*

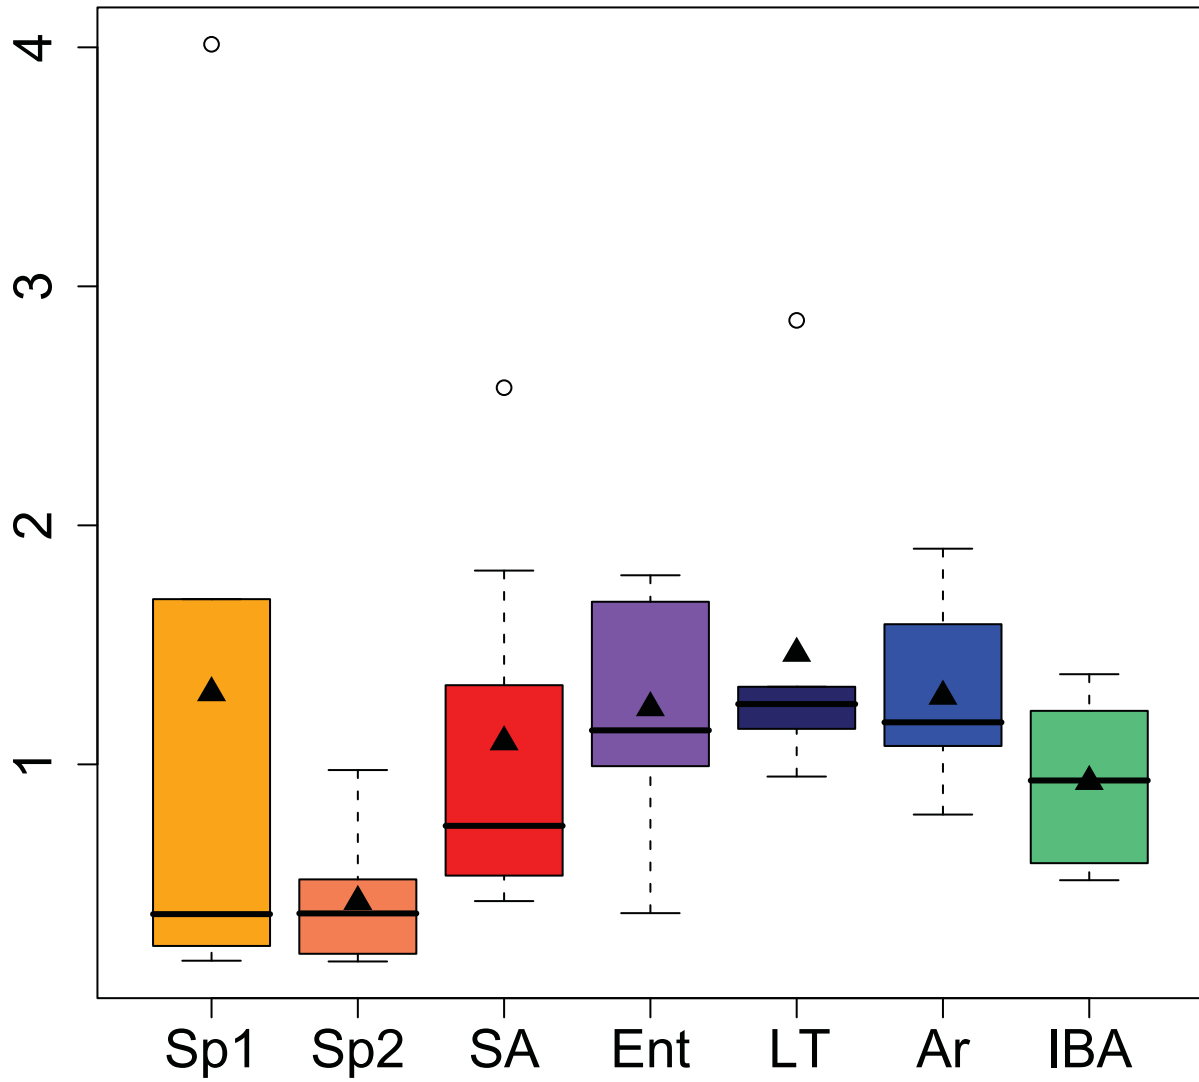

# 1-palmitoylglycerophosphocholine

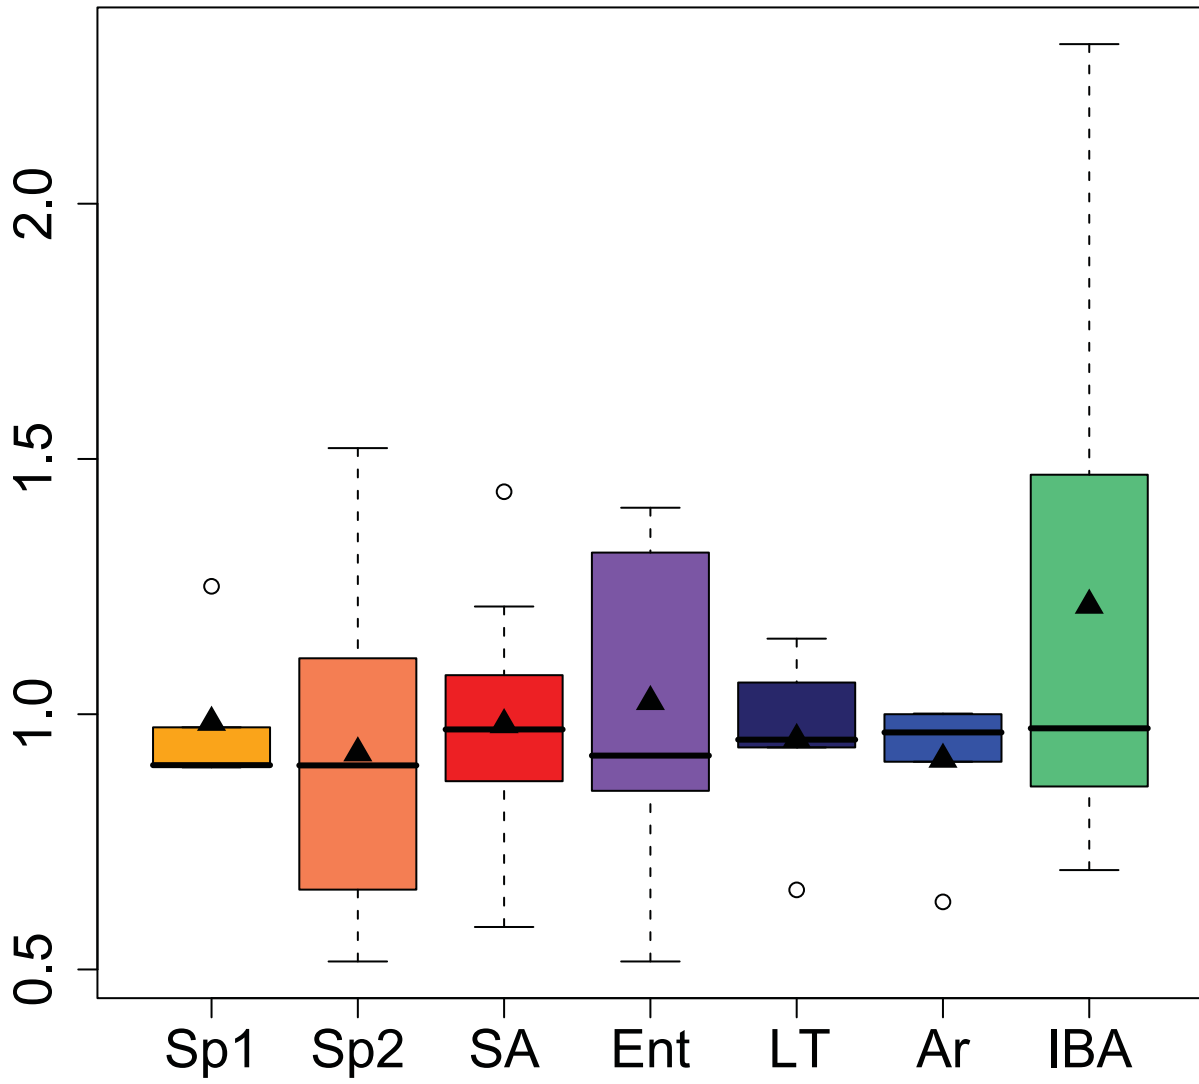

# 1-palmitoylglycerophosphoethanolamine

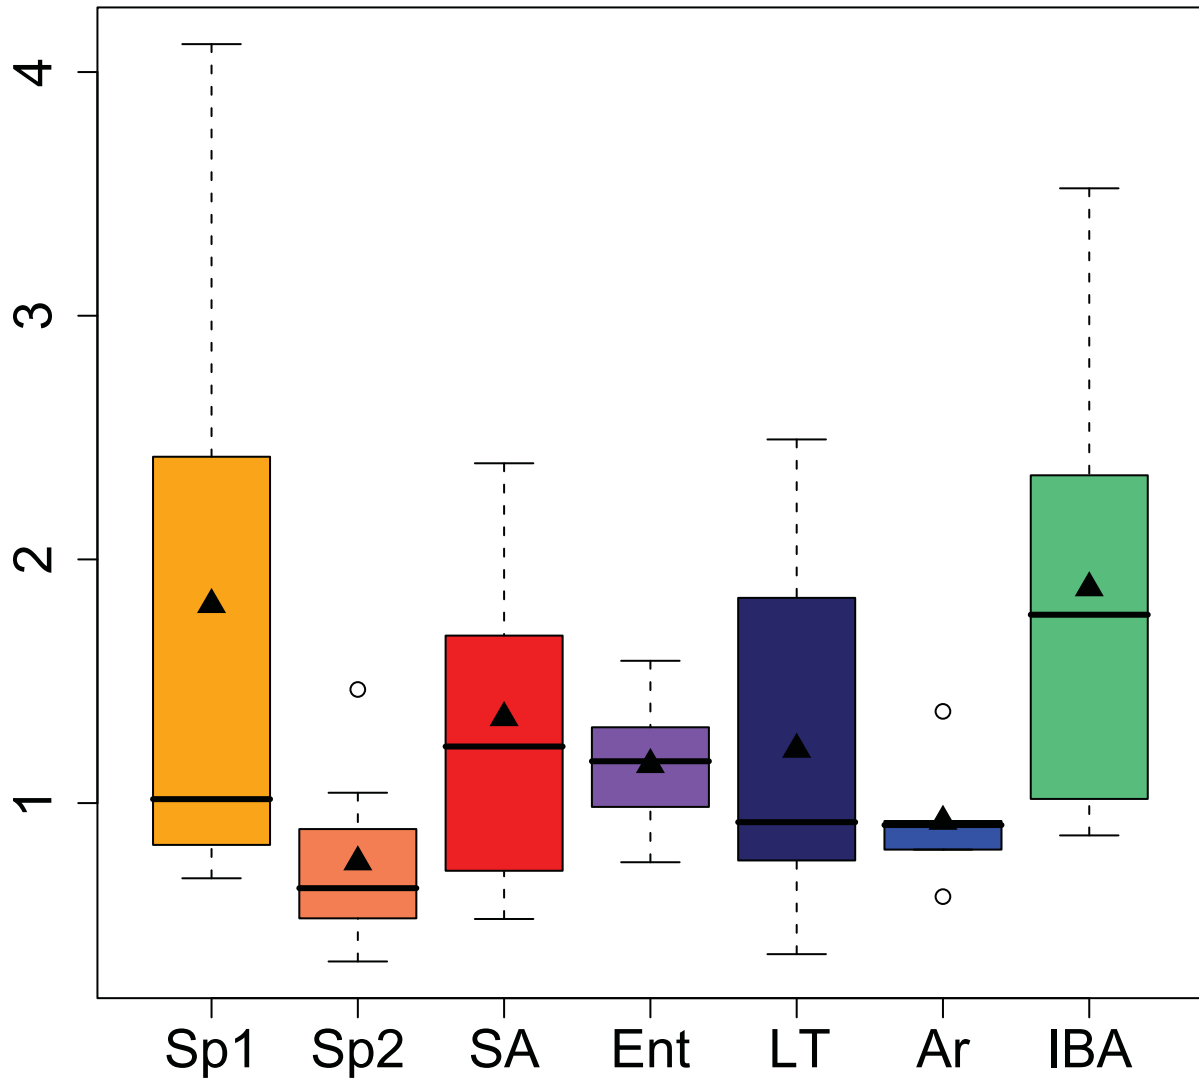

# 1-palmitoylglycerophosphoinositol-

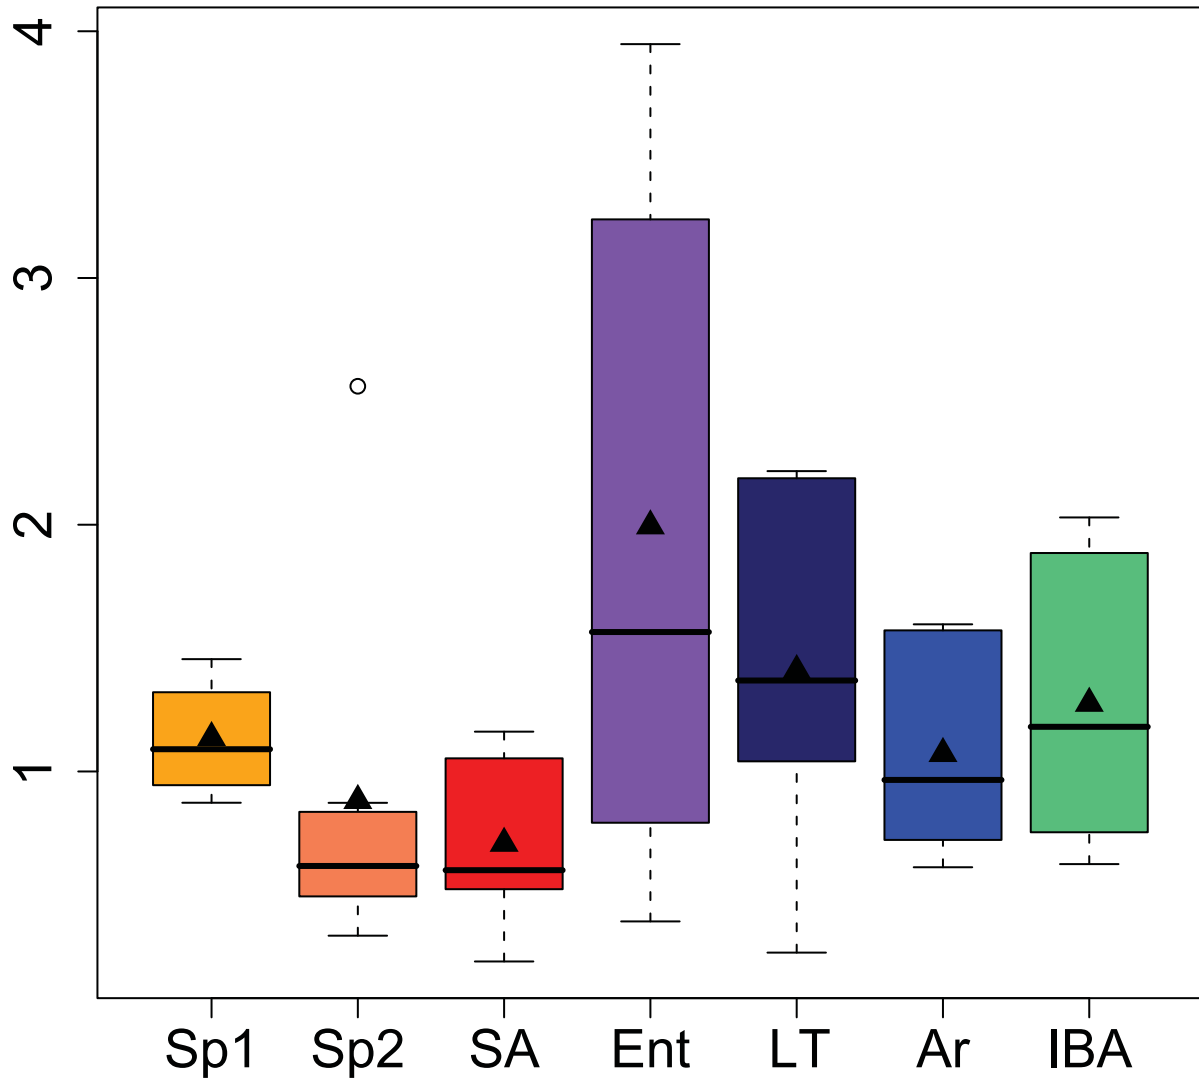

# 1-stearoylglycerophosphocholine

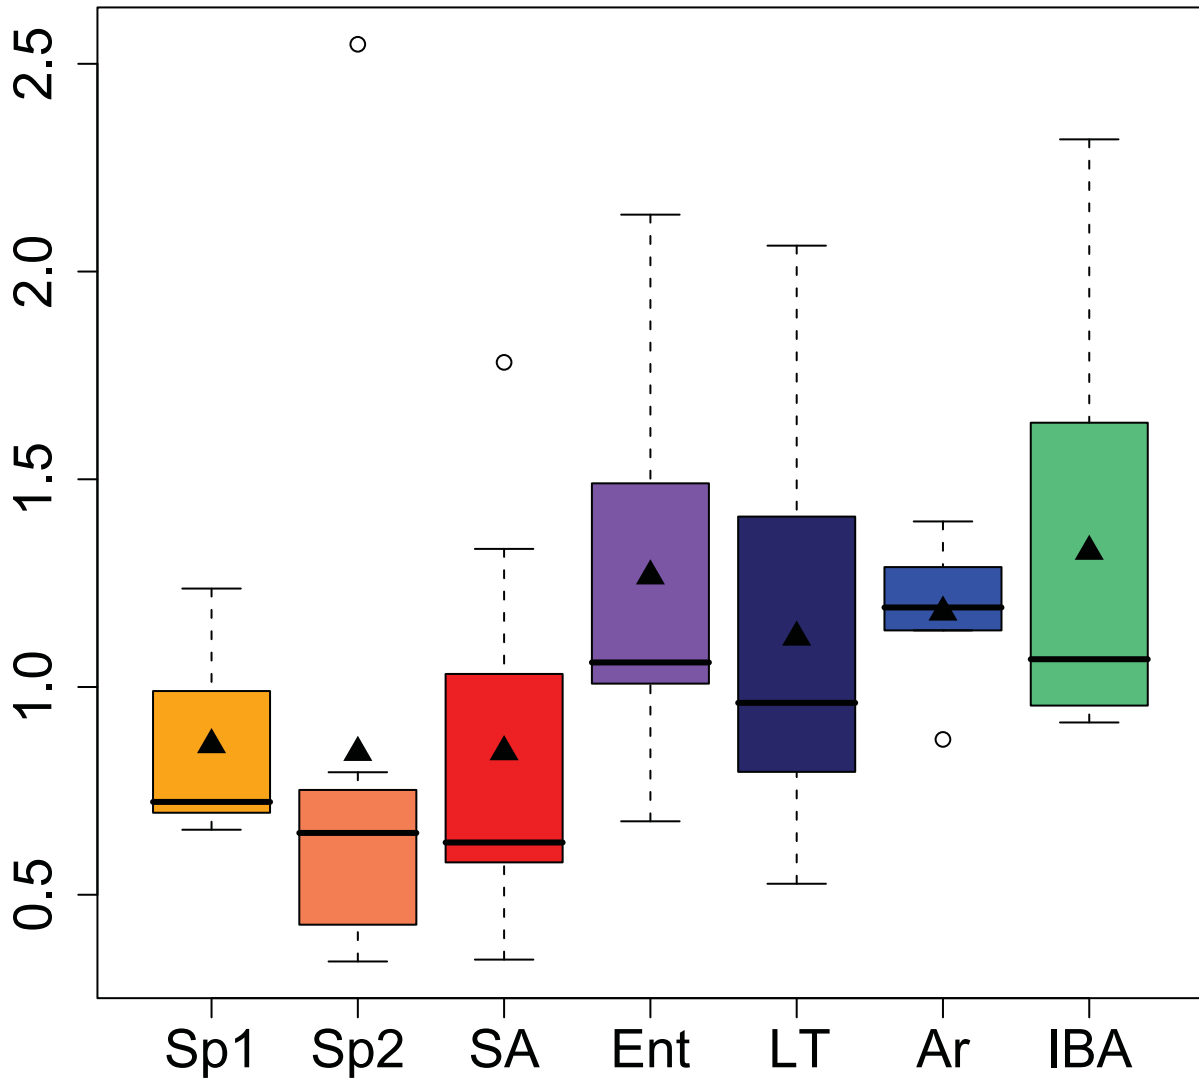



# 1-stearoylglycerophosphoethanolamine

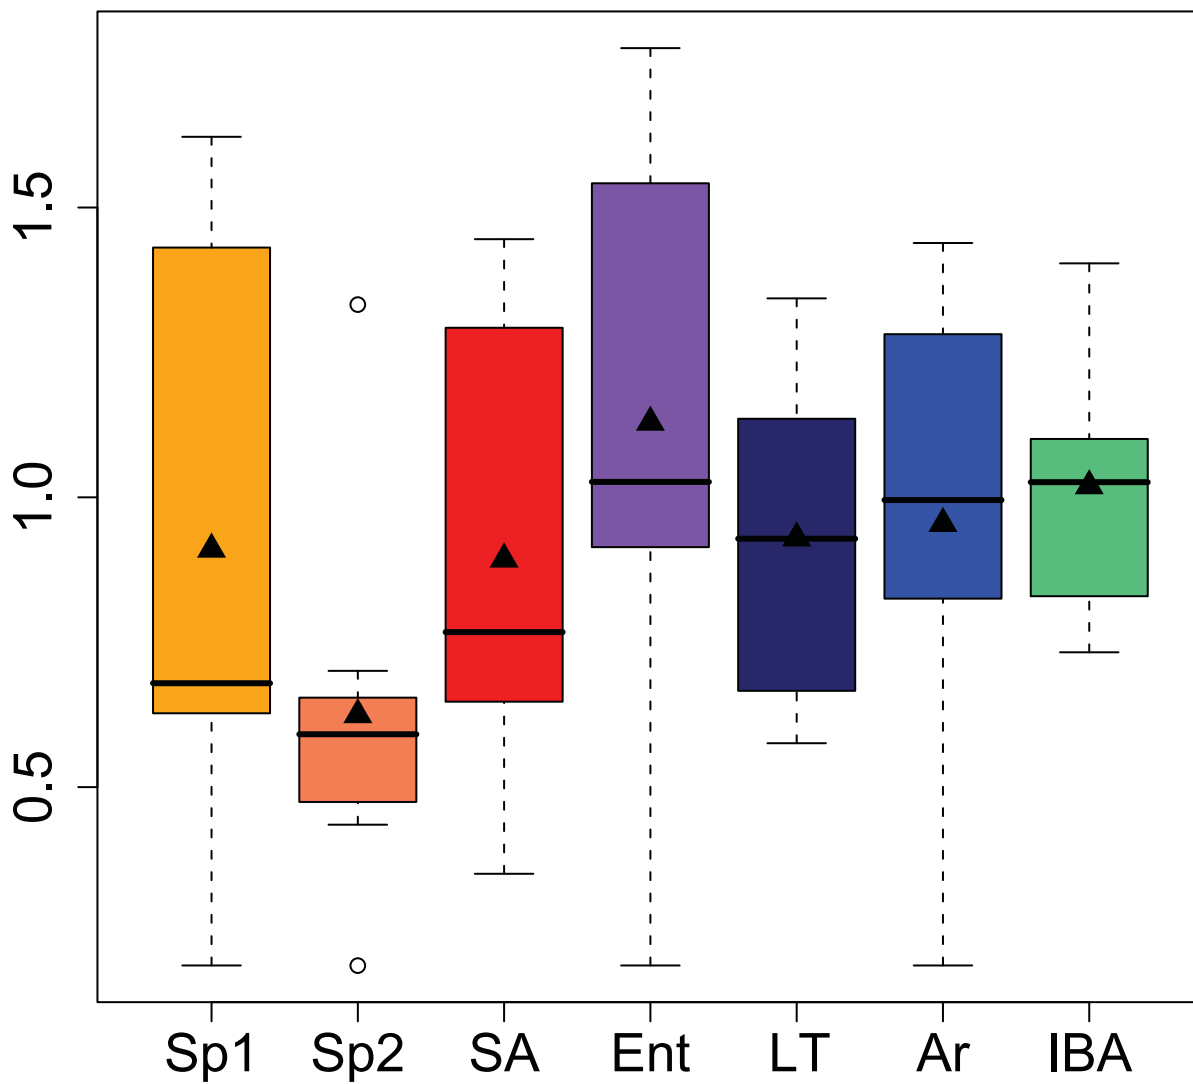

# 1-stearoylglycerophosphoinositol

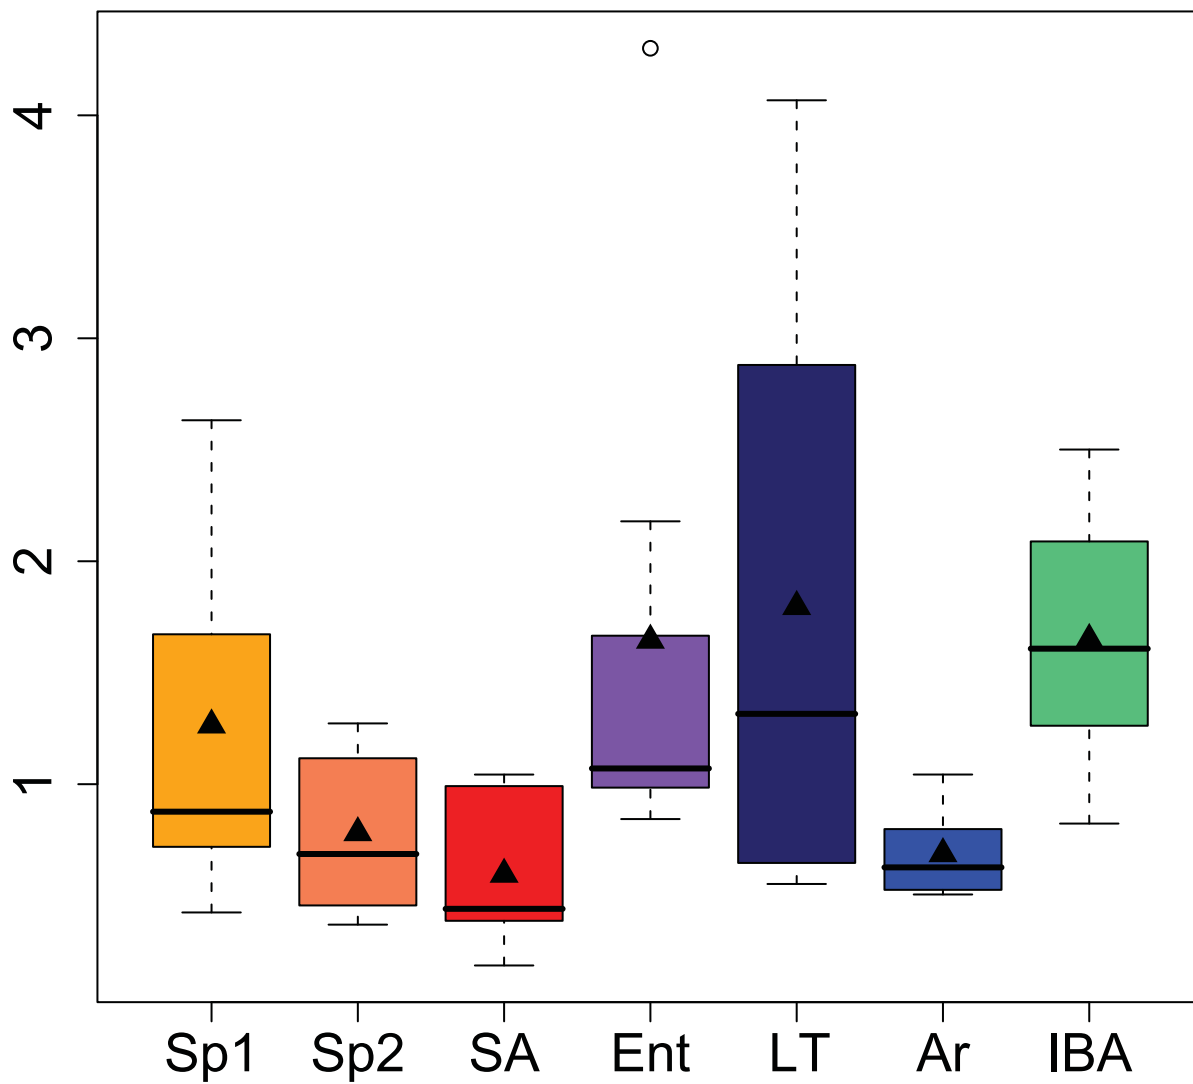

2-arachidonoylglycerophosphocholine\*

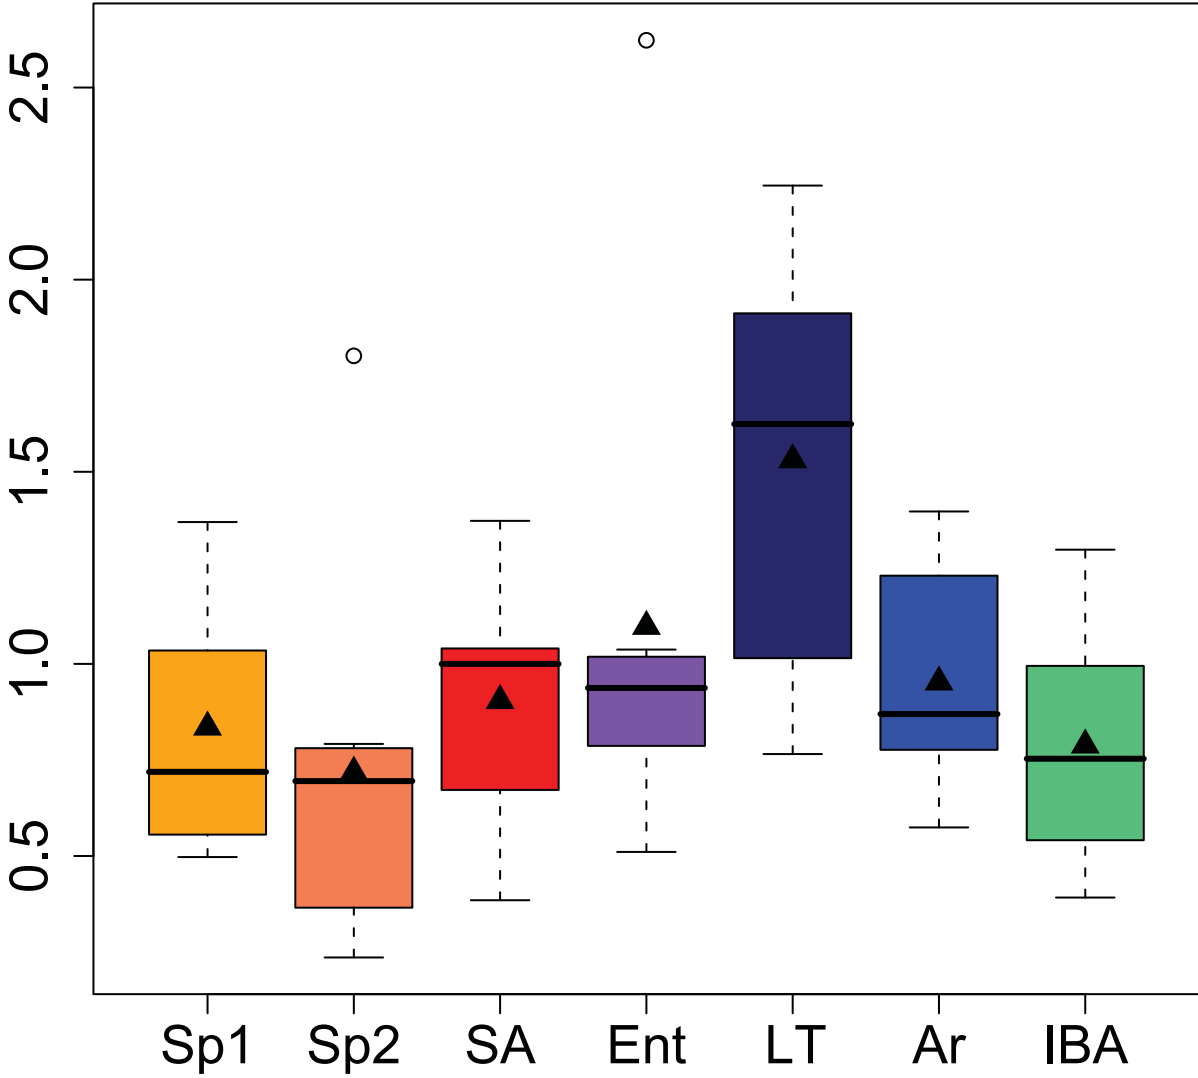

# 2-arachidonoylglycerophosphoethanolamine-

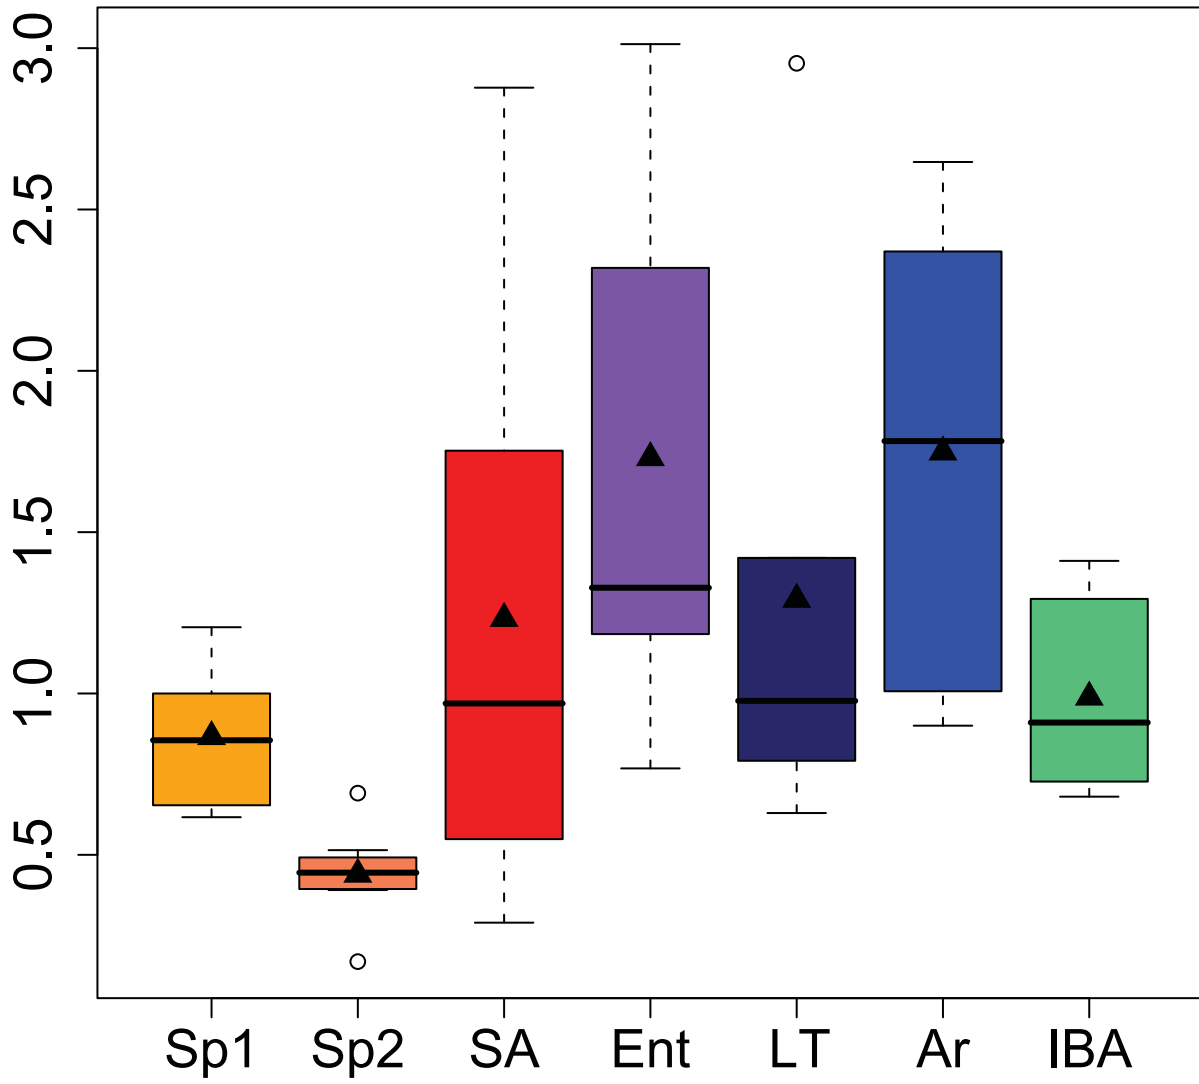

2-linoleoylglycerophosphocholine\*

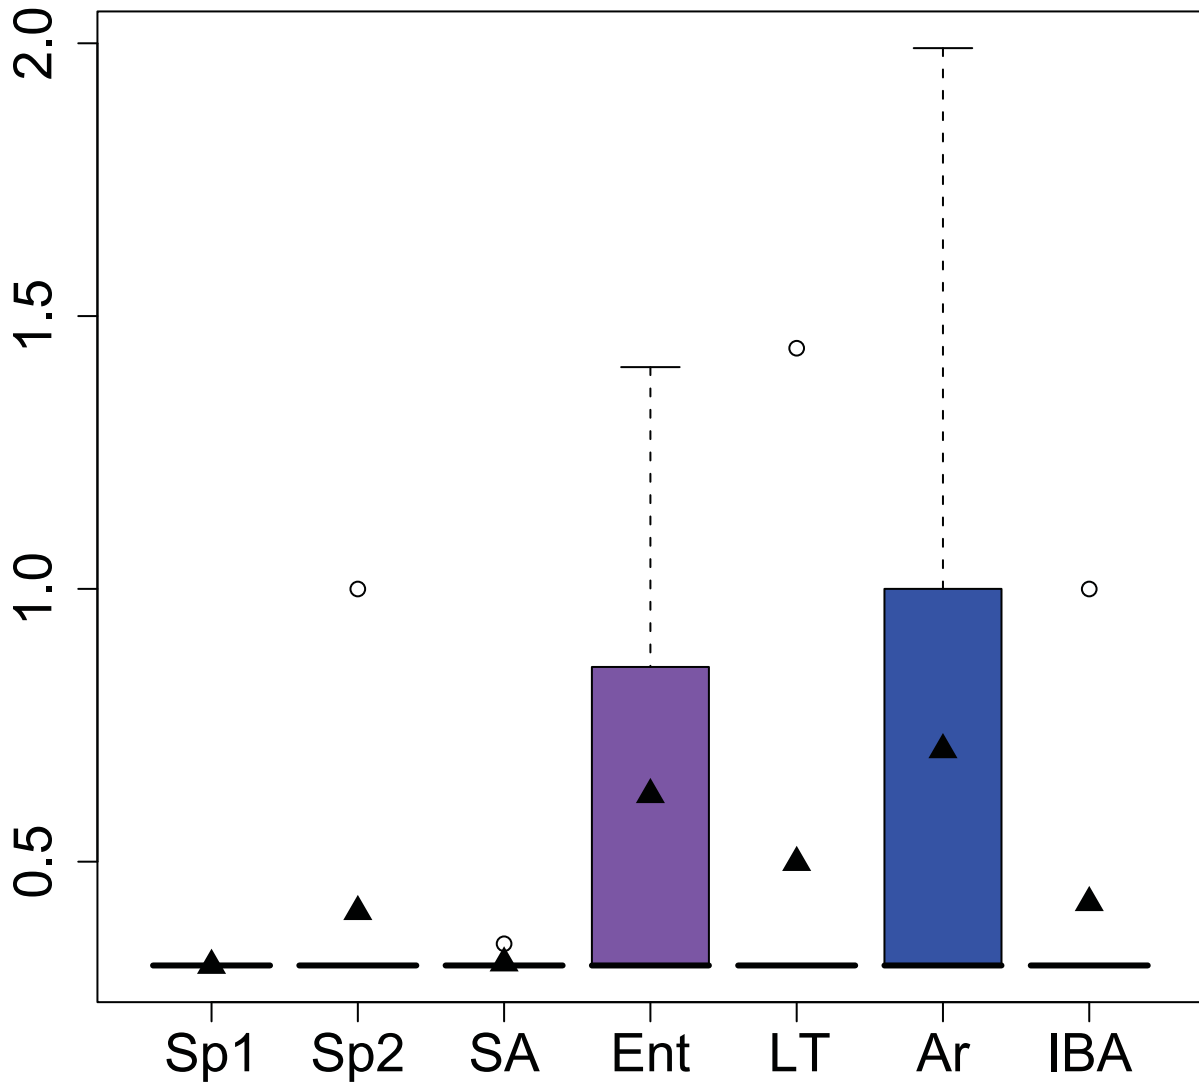

# 2-oleoylglycerophosphocholine\*

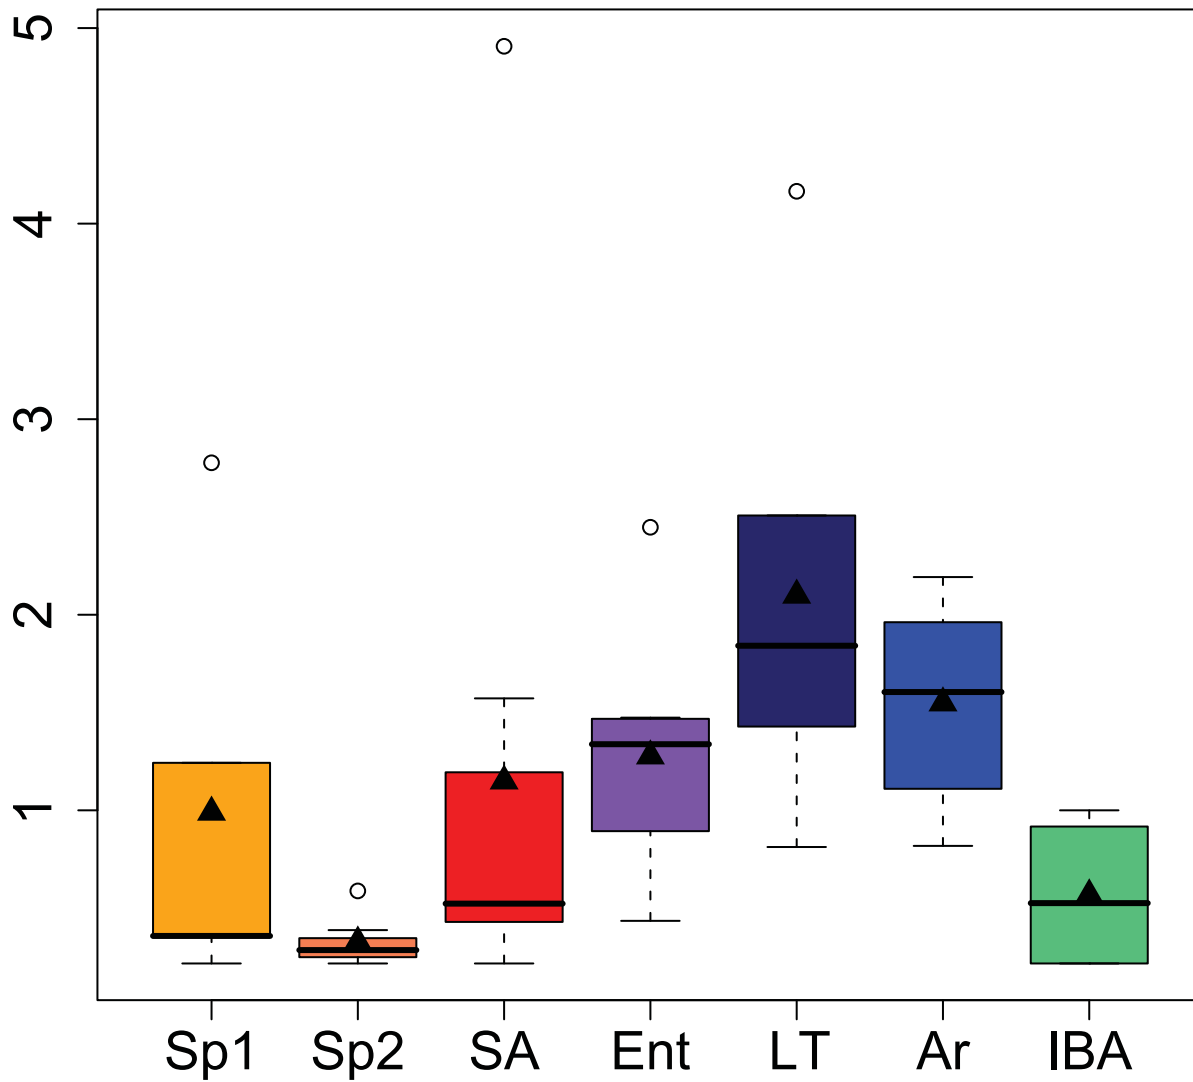

## 2-oleoylglycerophosphoethanolamine-

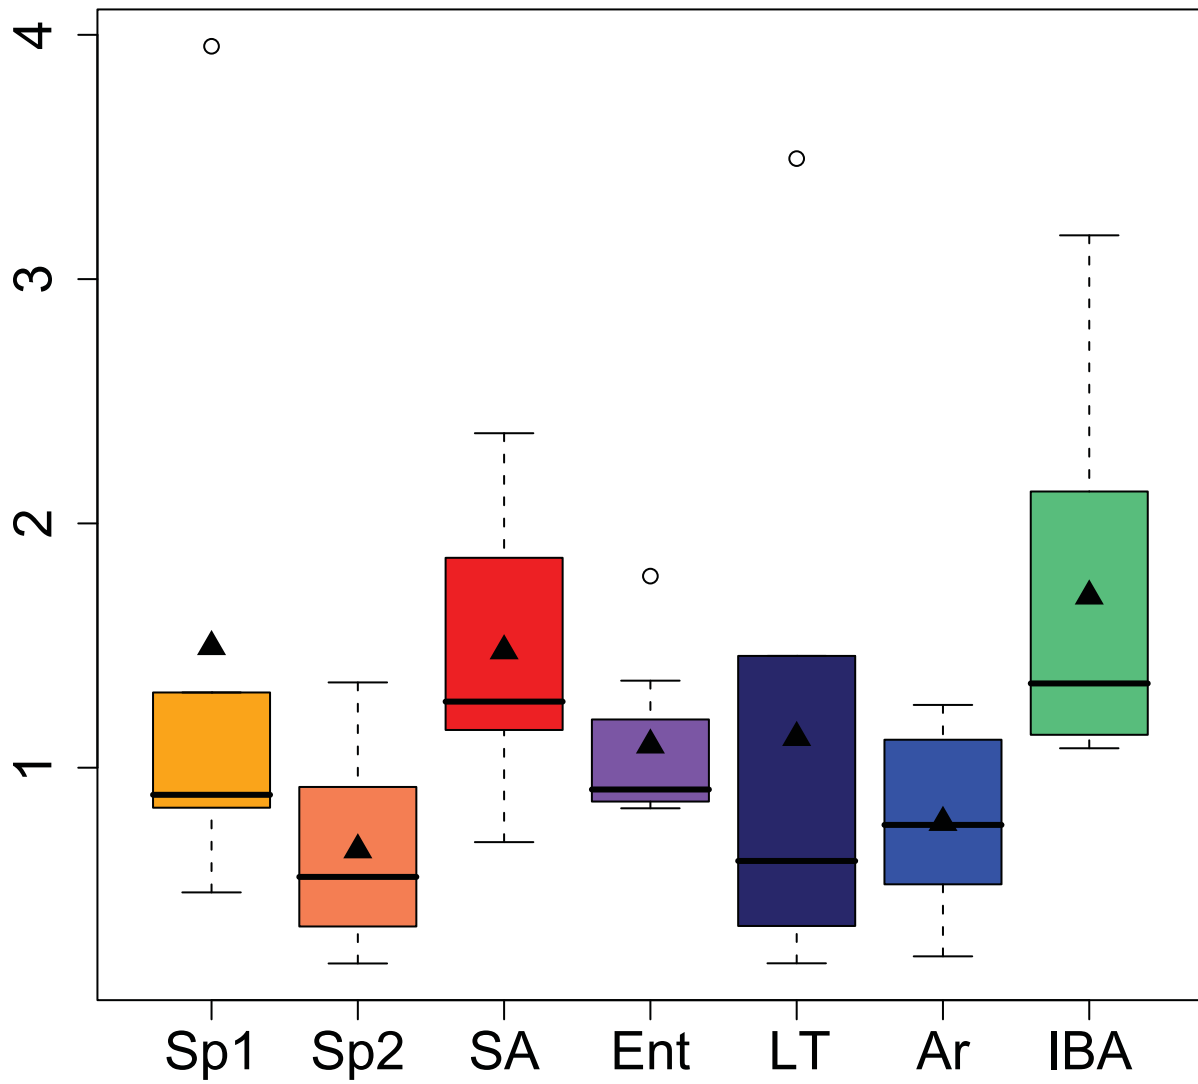

# 2-palmitoylglycerophosphocholine\*

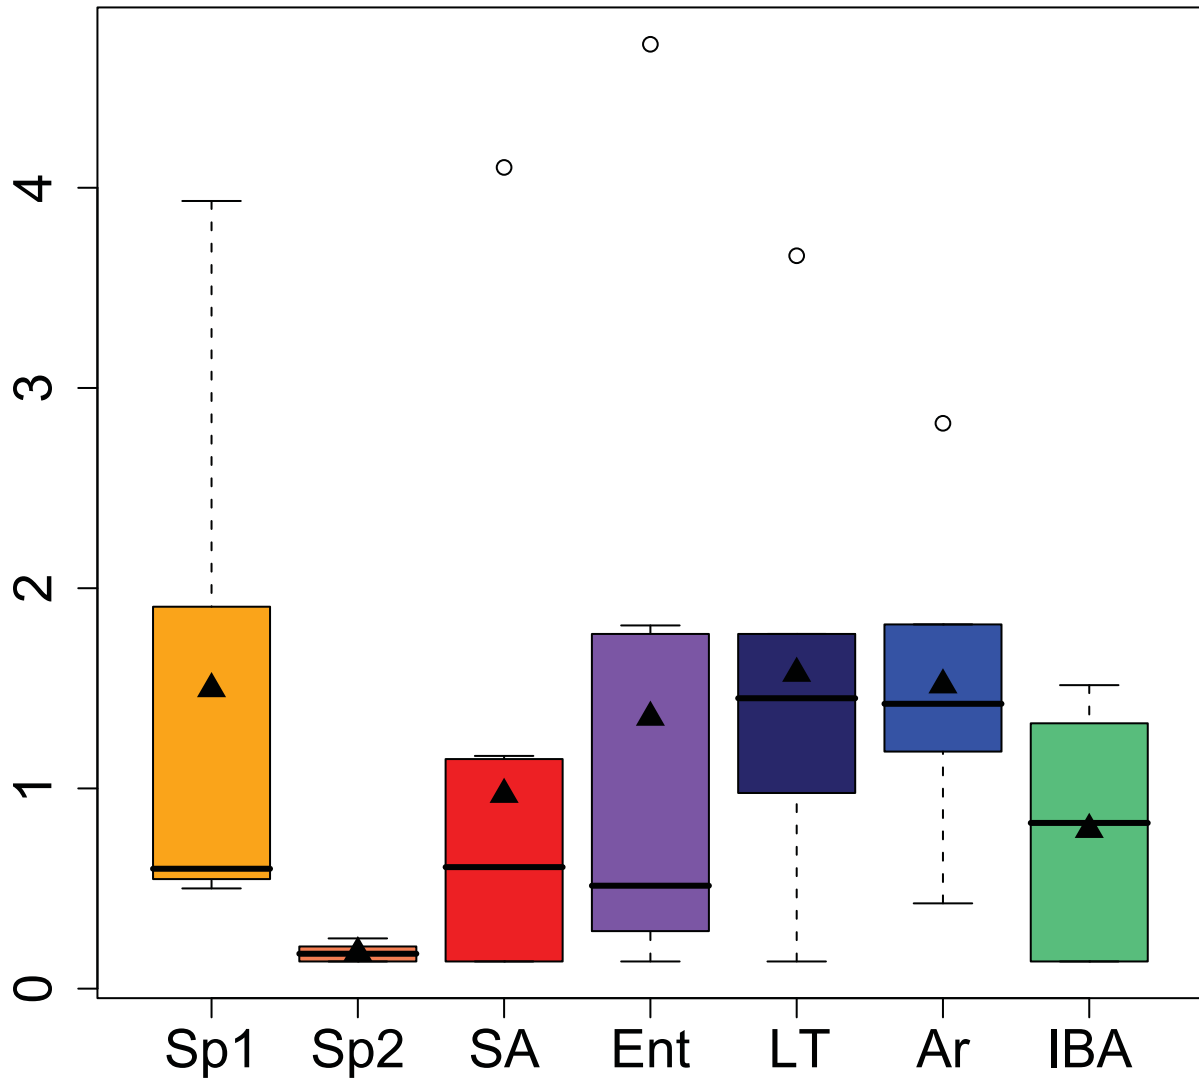



2-palmitoylglycerophosphoethanolamine-

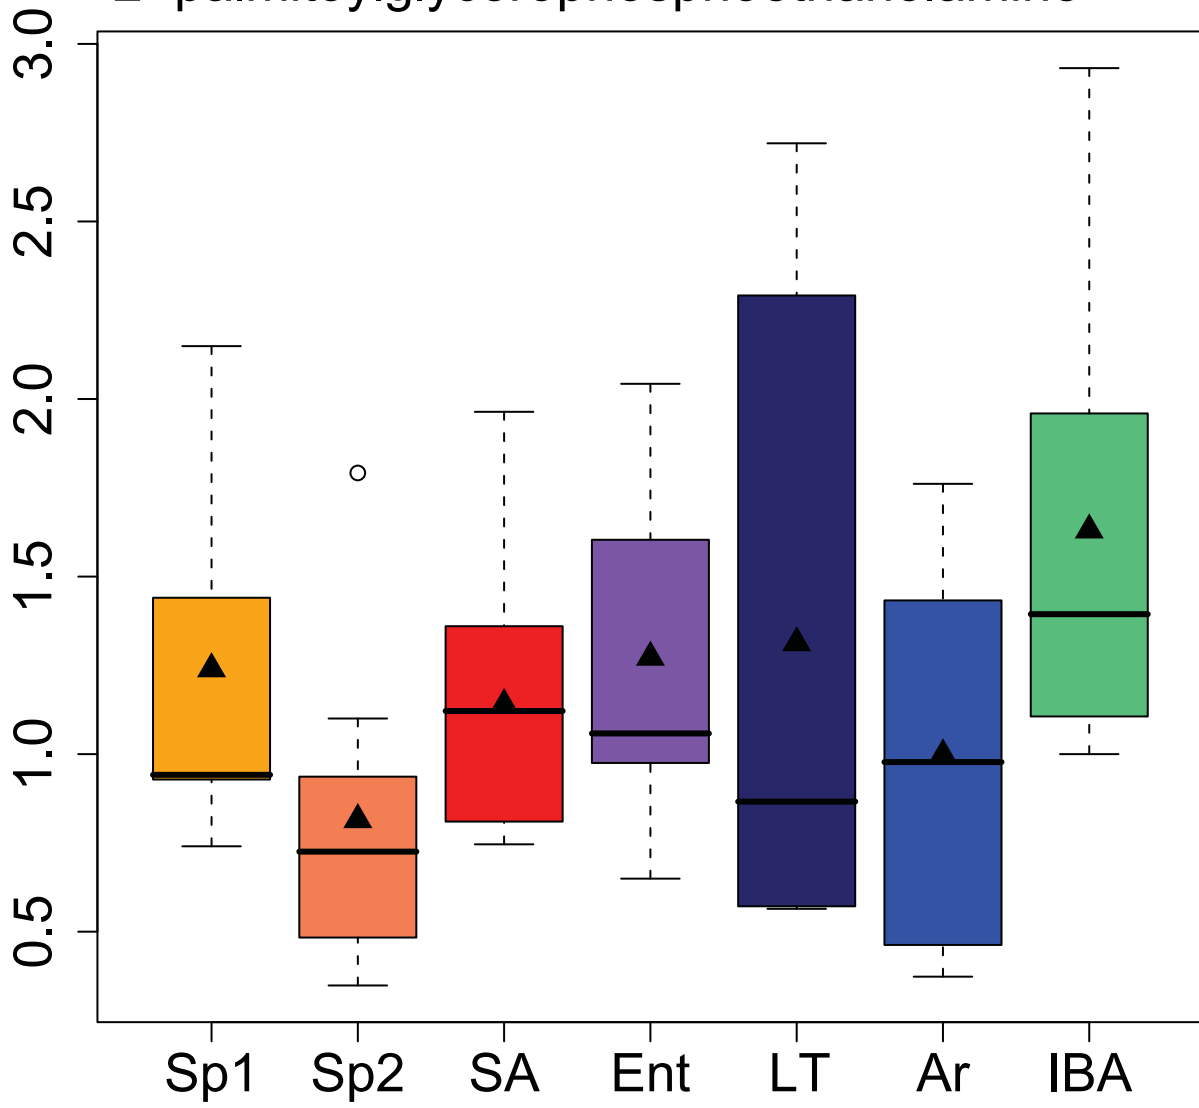

# 2-stearoylglycerophosphocholine\*

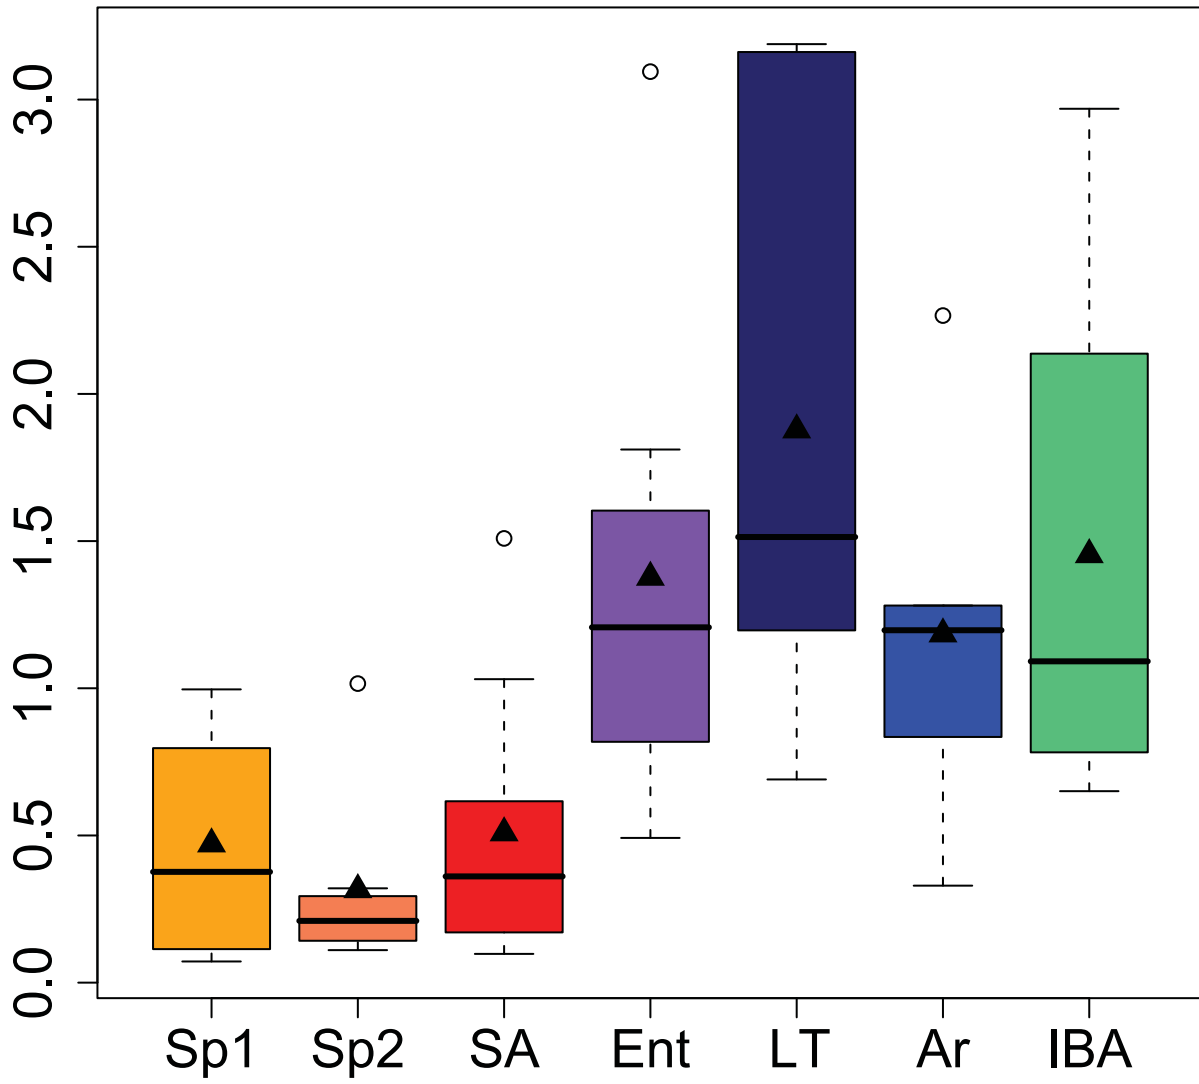

# choline

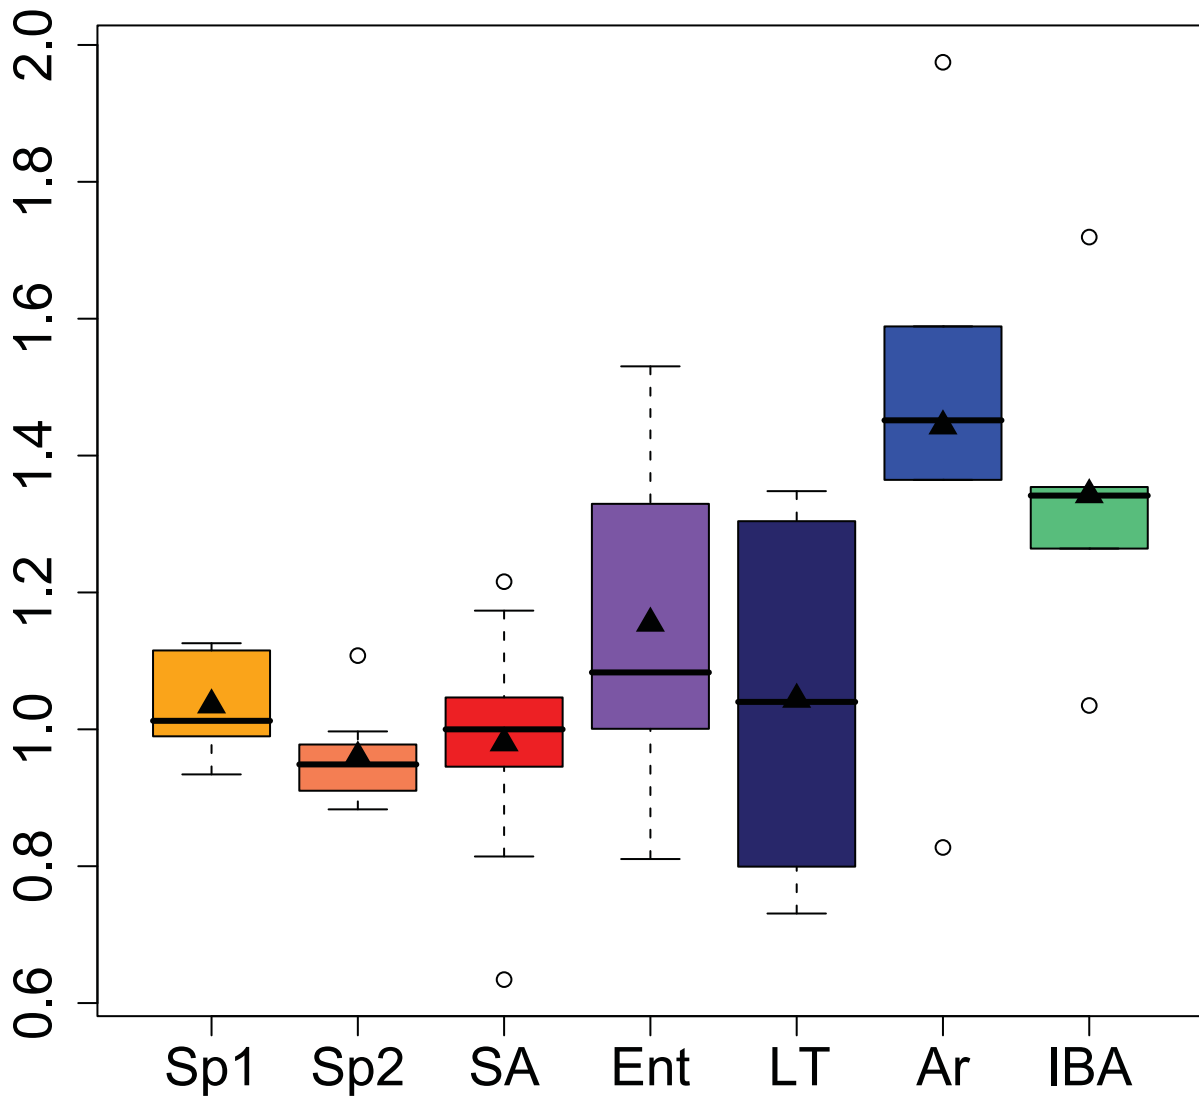

# diisopropanolamine

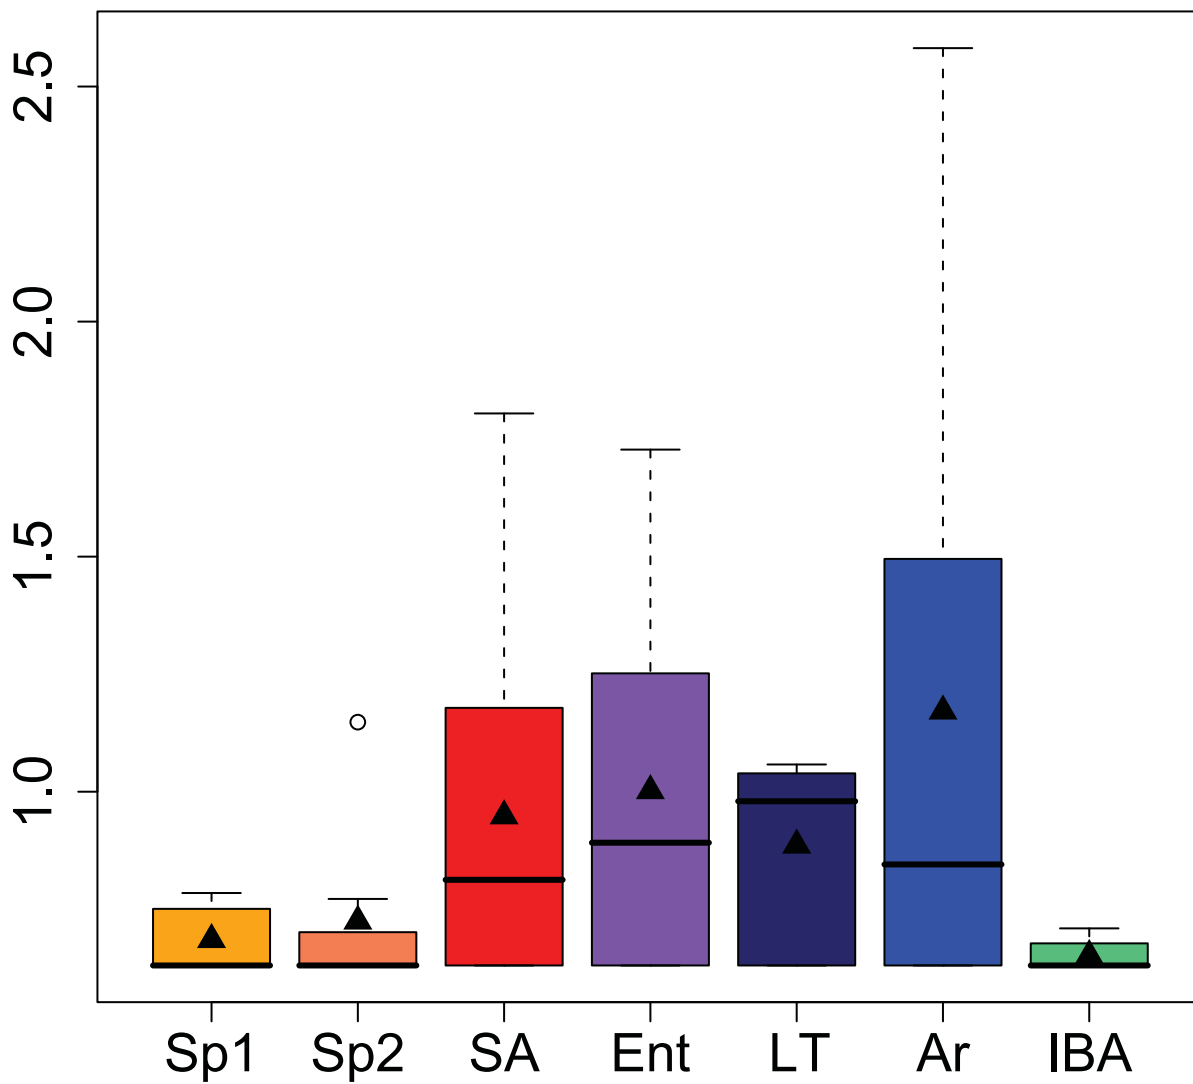

# glycerol

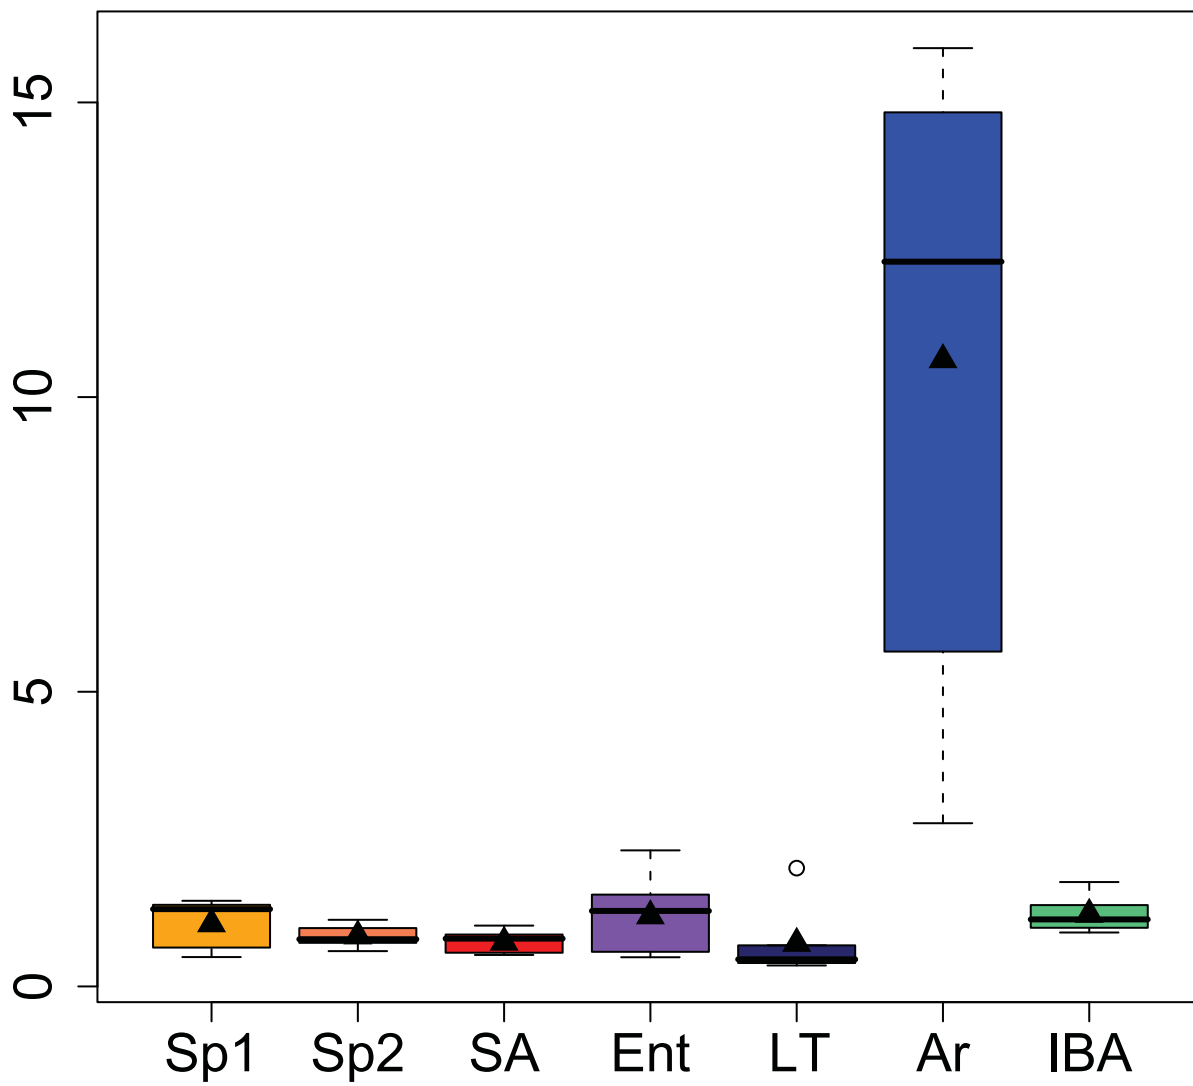

# glycerol 3-phosphate (G3P)

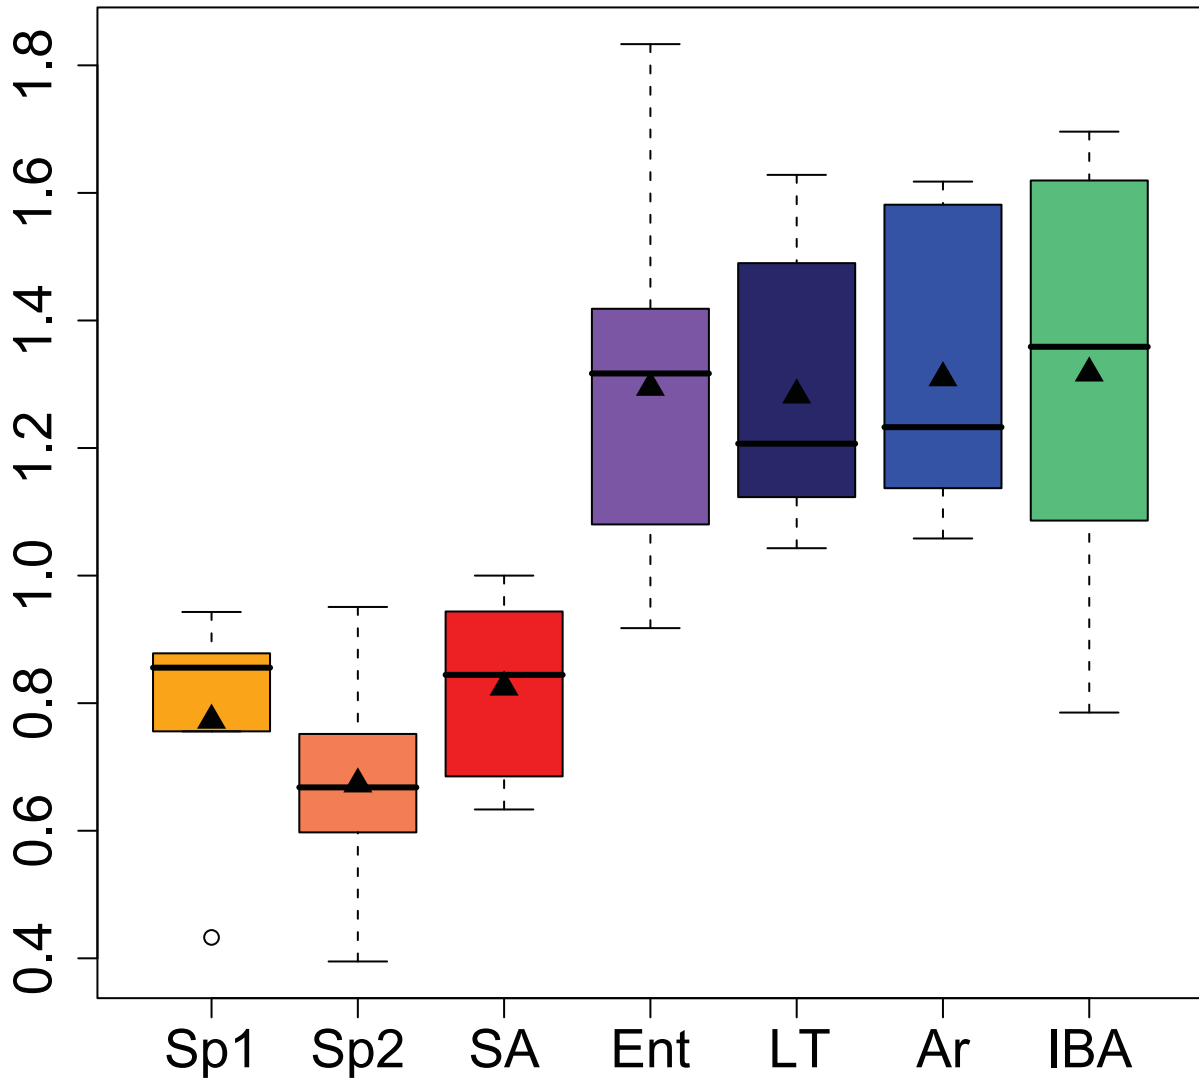

# glycerophosphorylcholine (GPC)

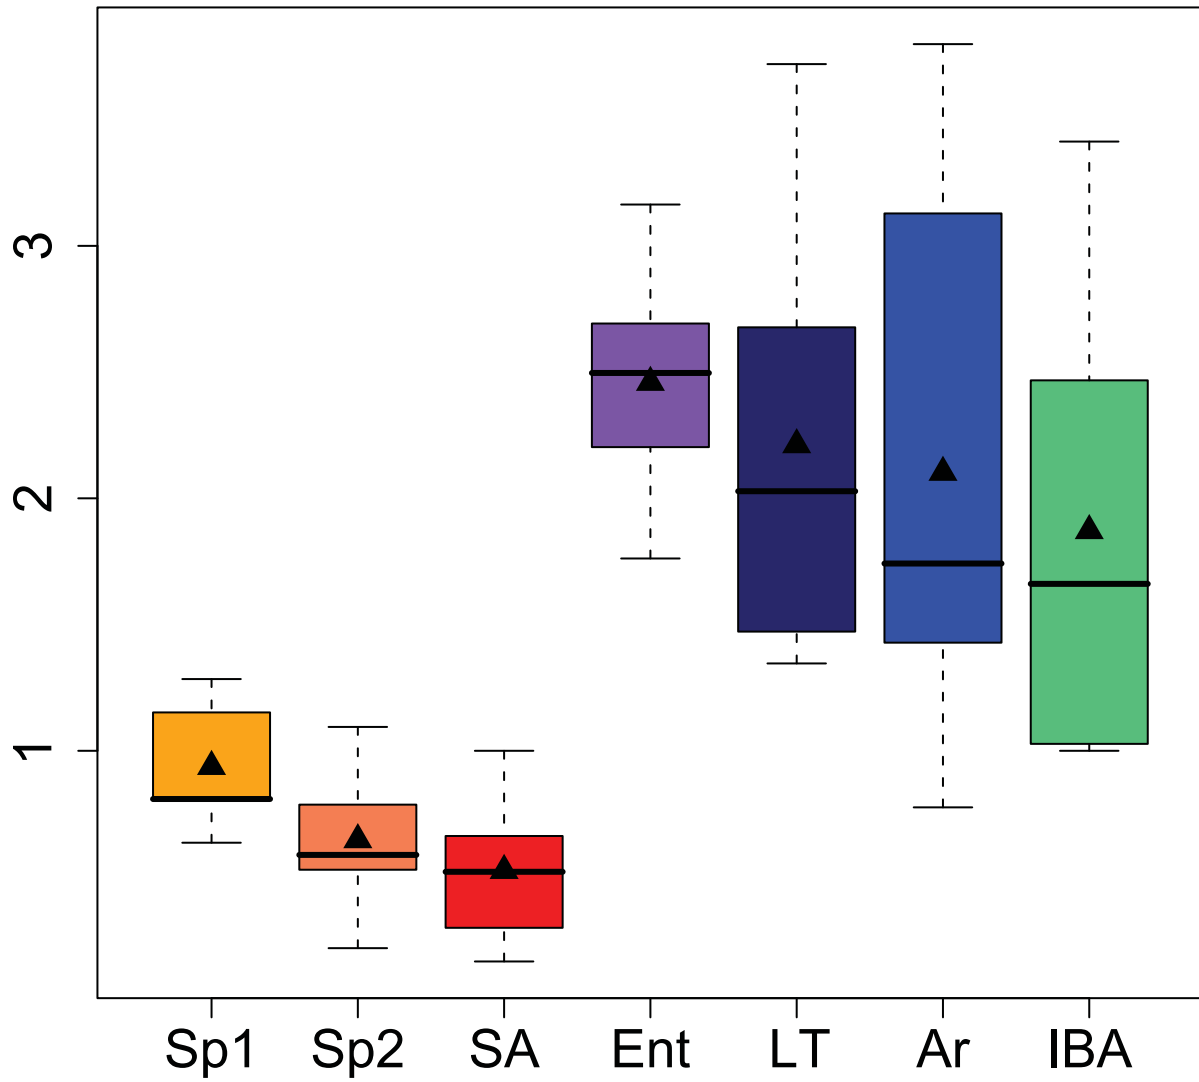

# inositol-1-phosphate (I1P)

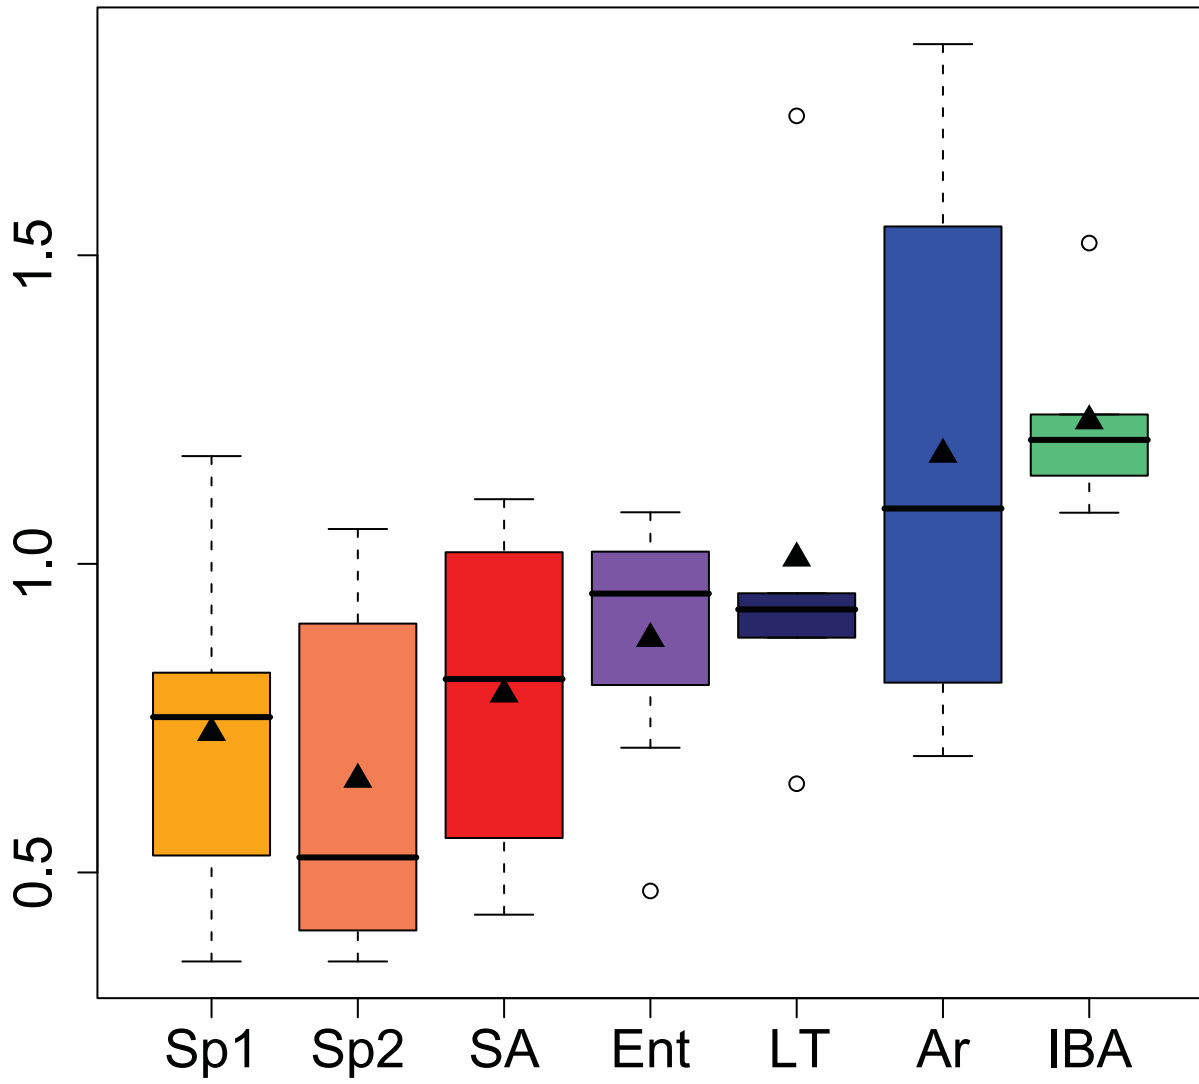



# myo-inositol

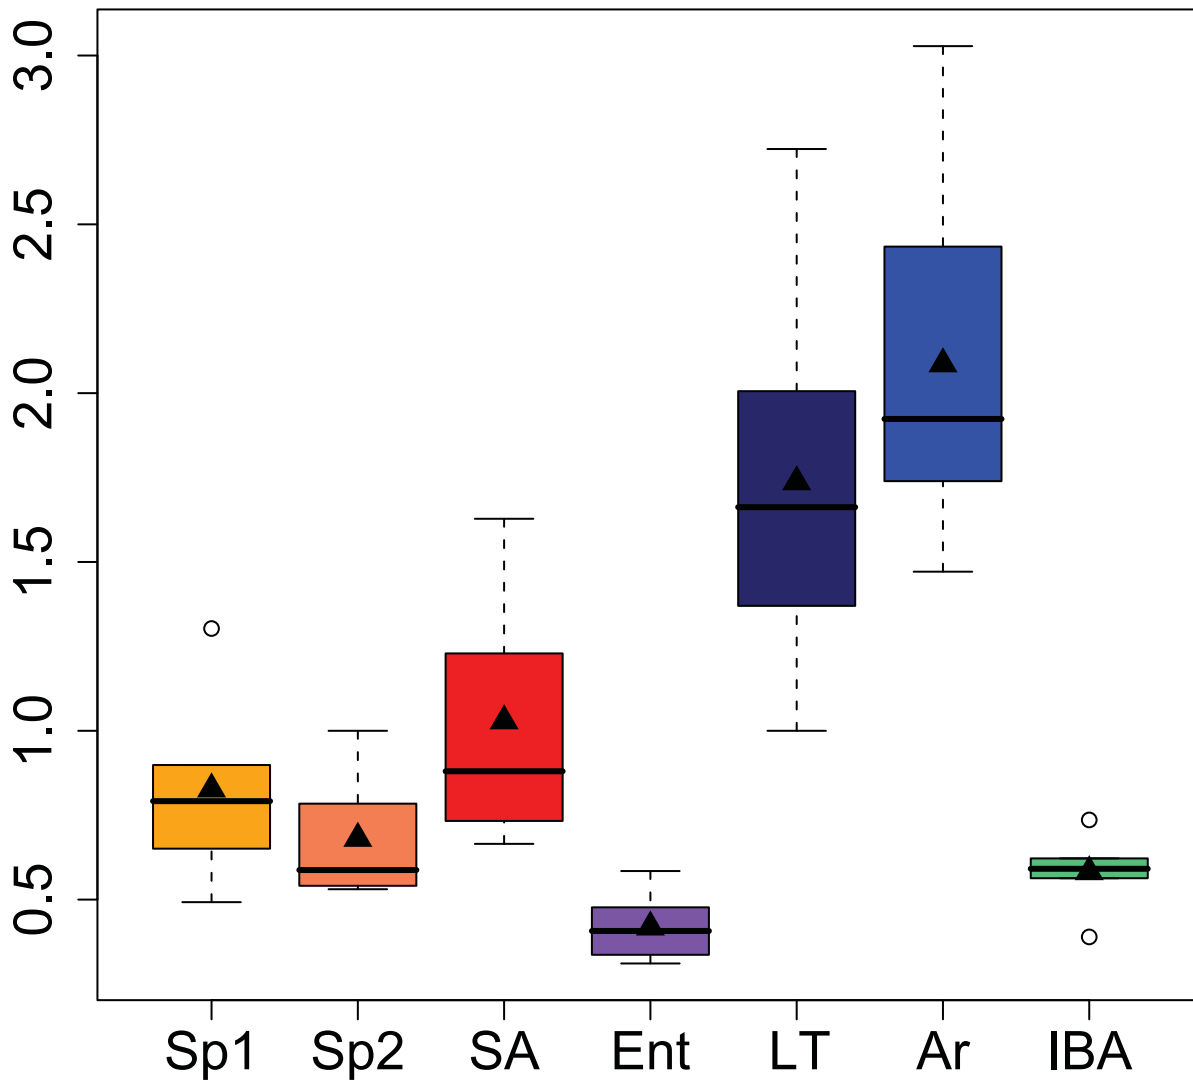

# scyllo-inositol

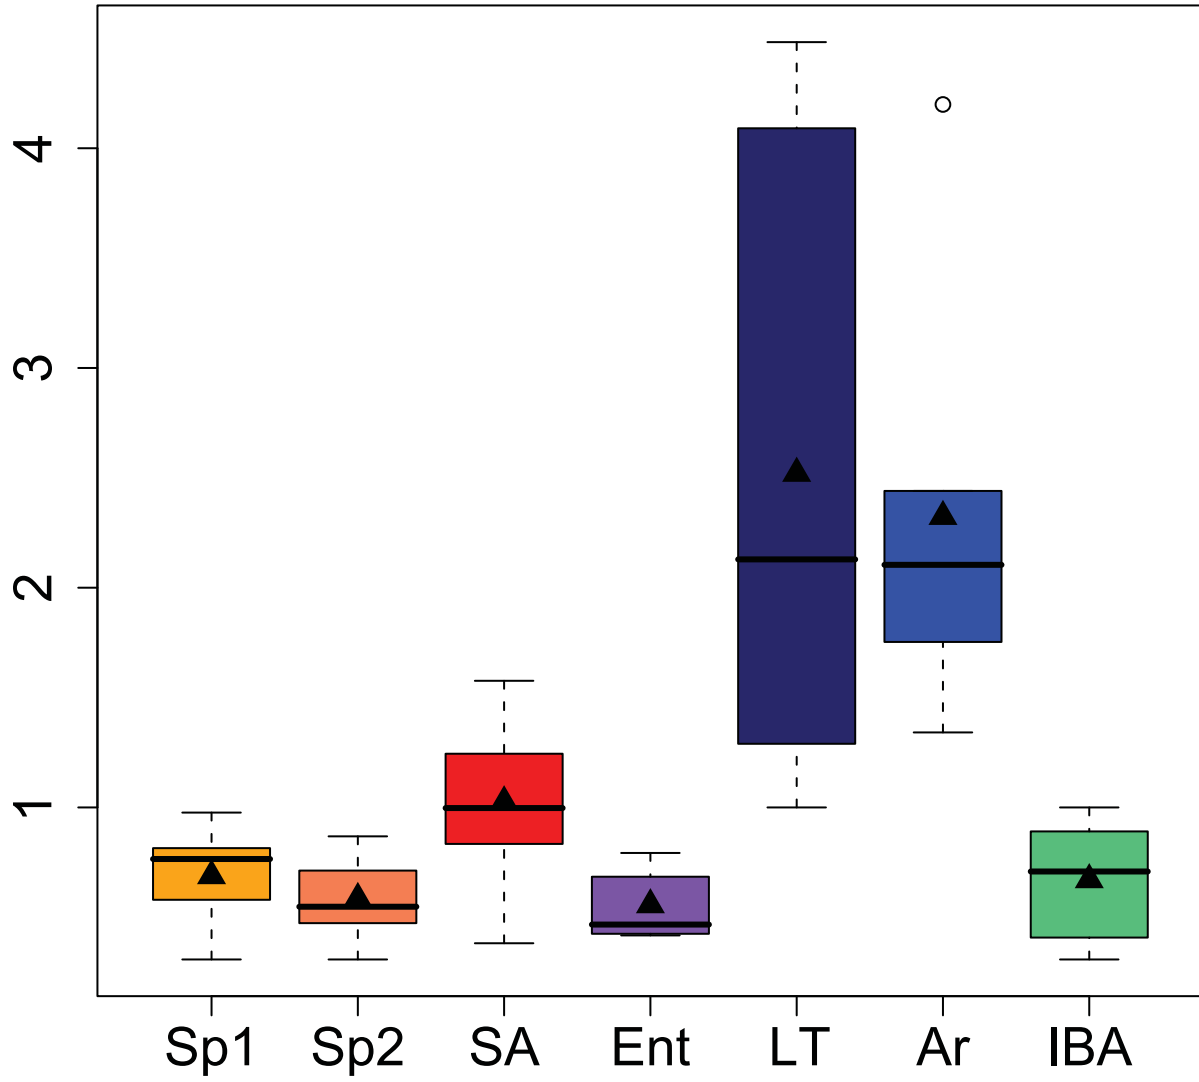

### 3-hydroxybutyrate (BHBA)

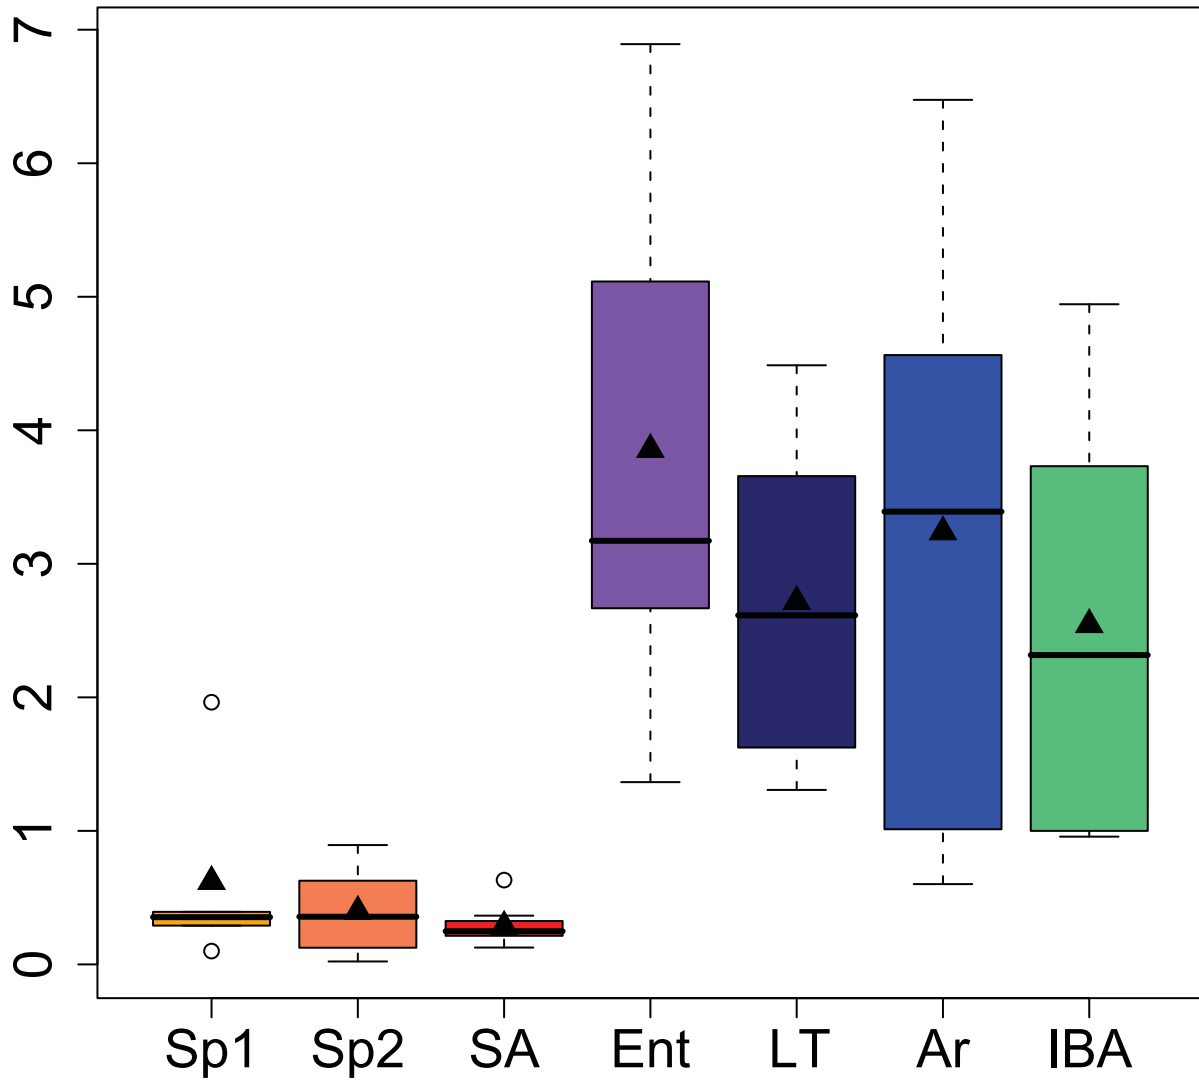

acetoacetate

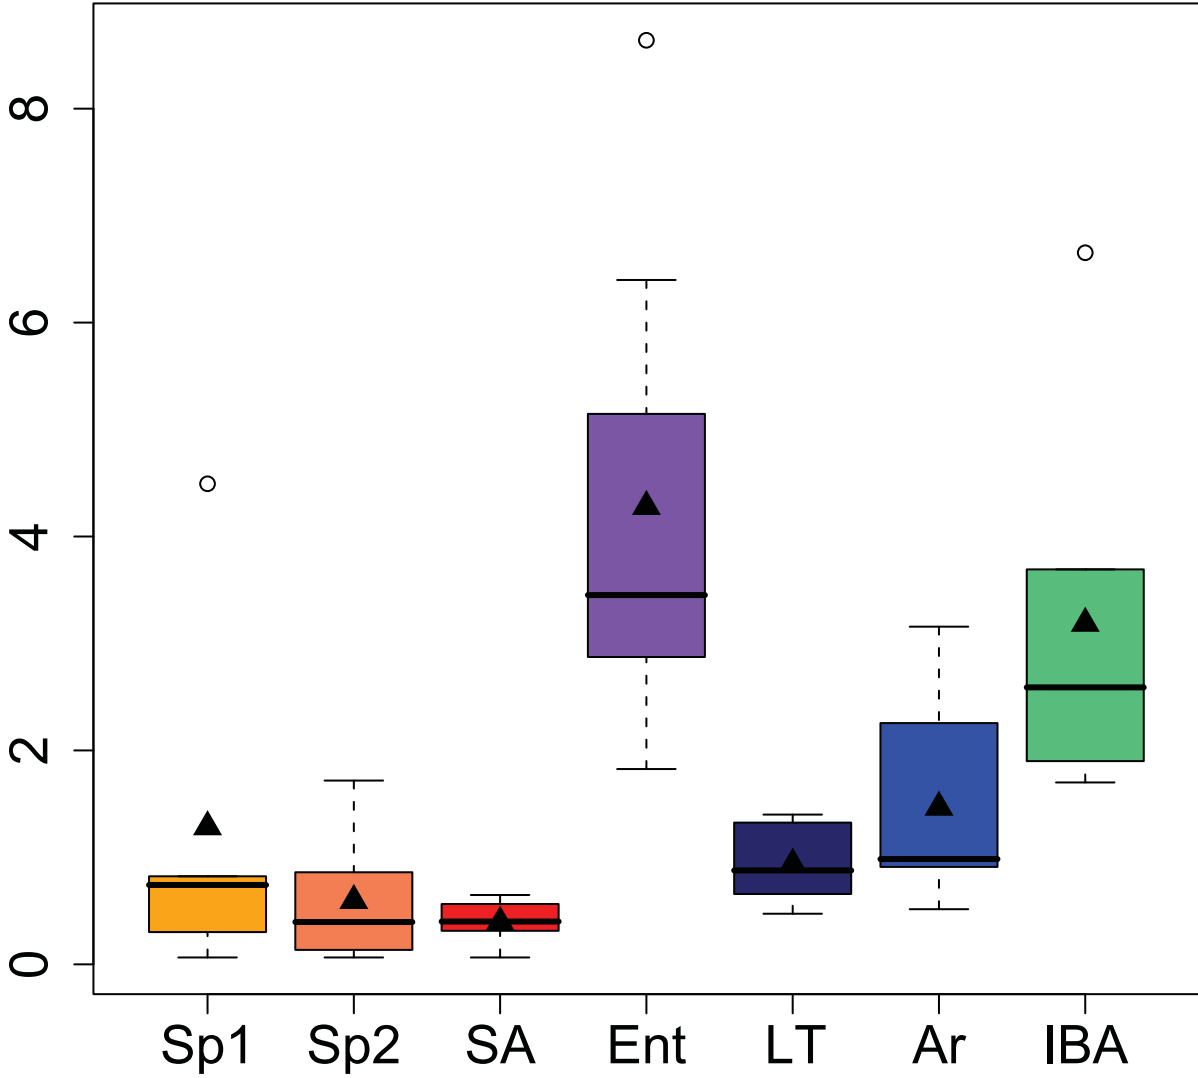

# 1-linoleoylglycerol (1-monolinolein)

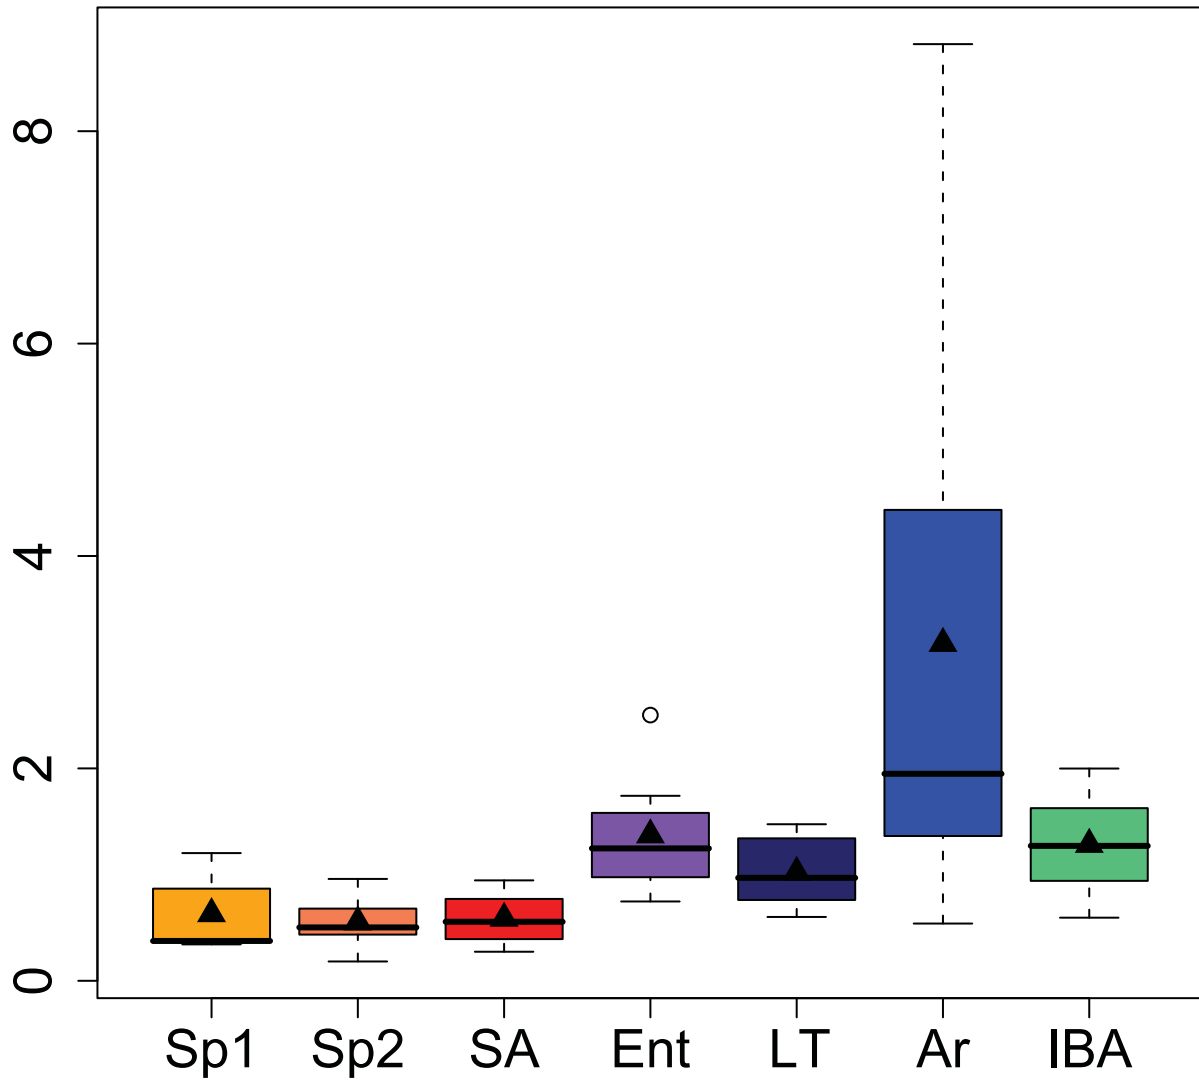

# 1-oleoylglycerol-1-monoolein-

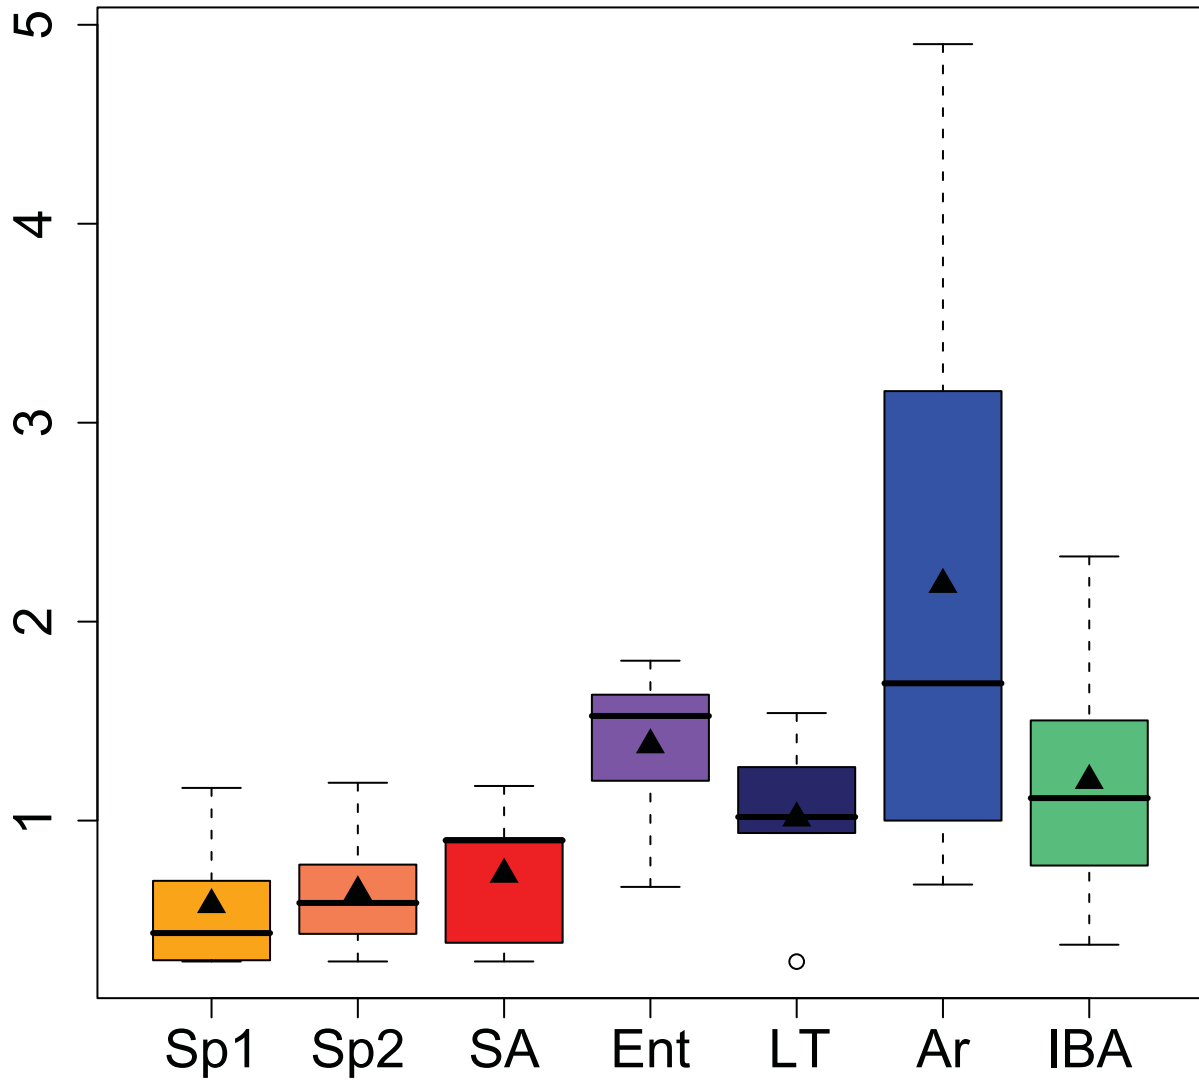

# 1-palmitoylglycerol (1-monopalmitin)

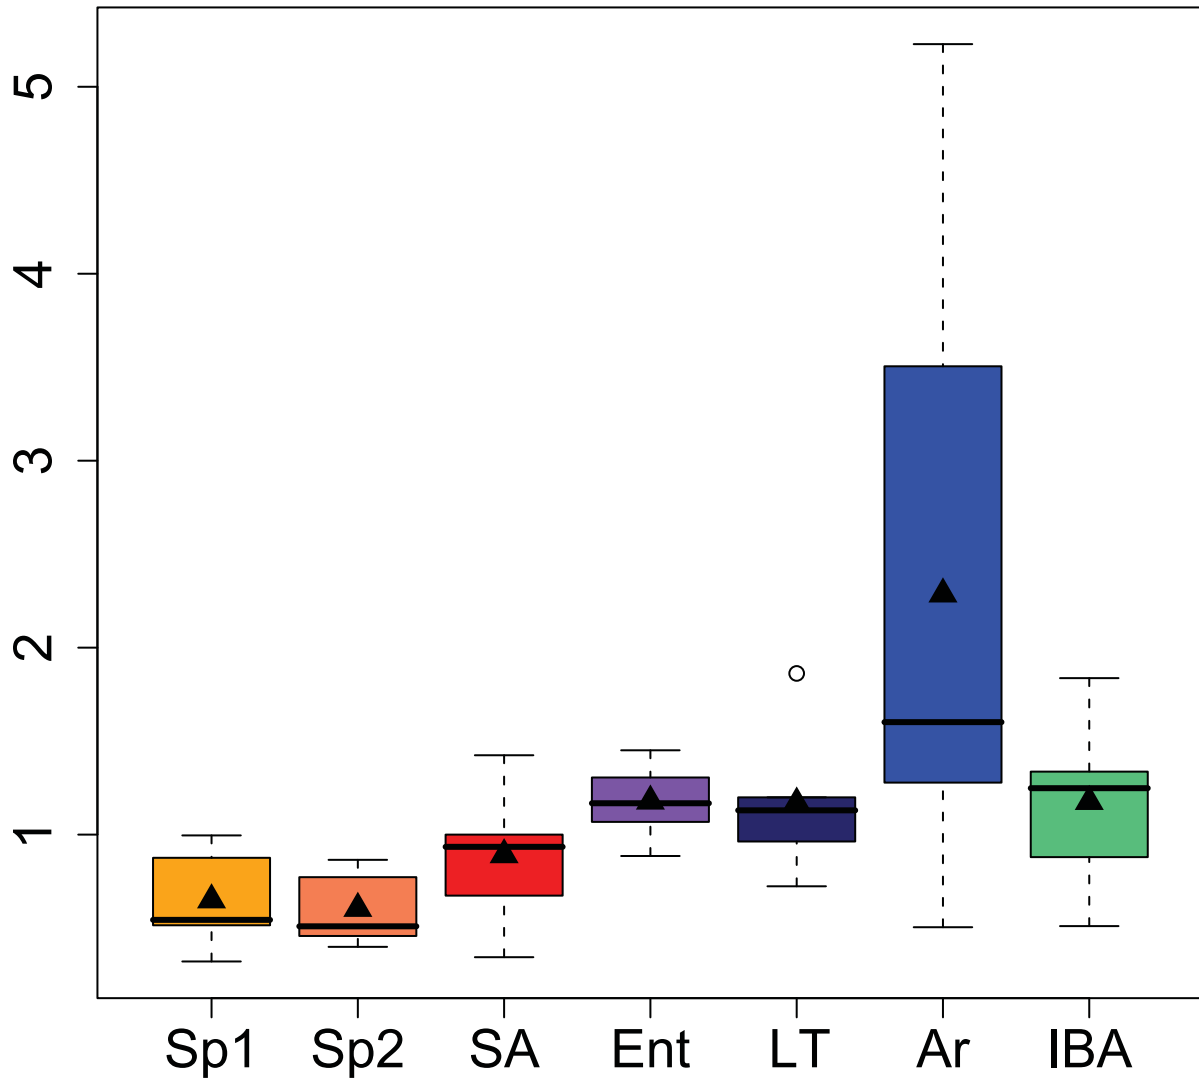

# 1-stearoylglycerol-1-monostearin-

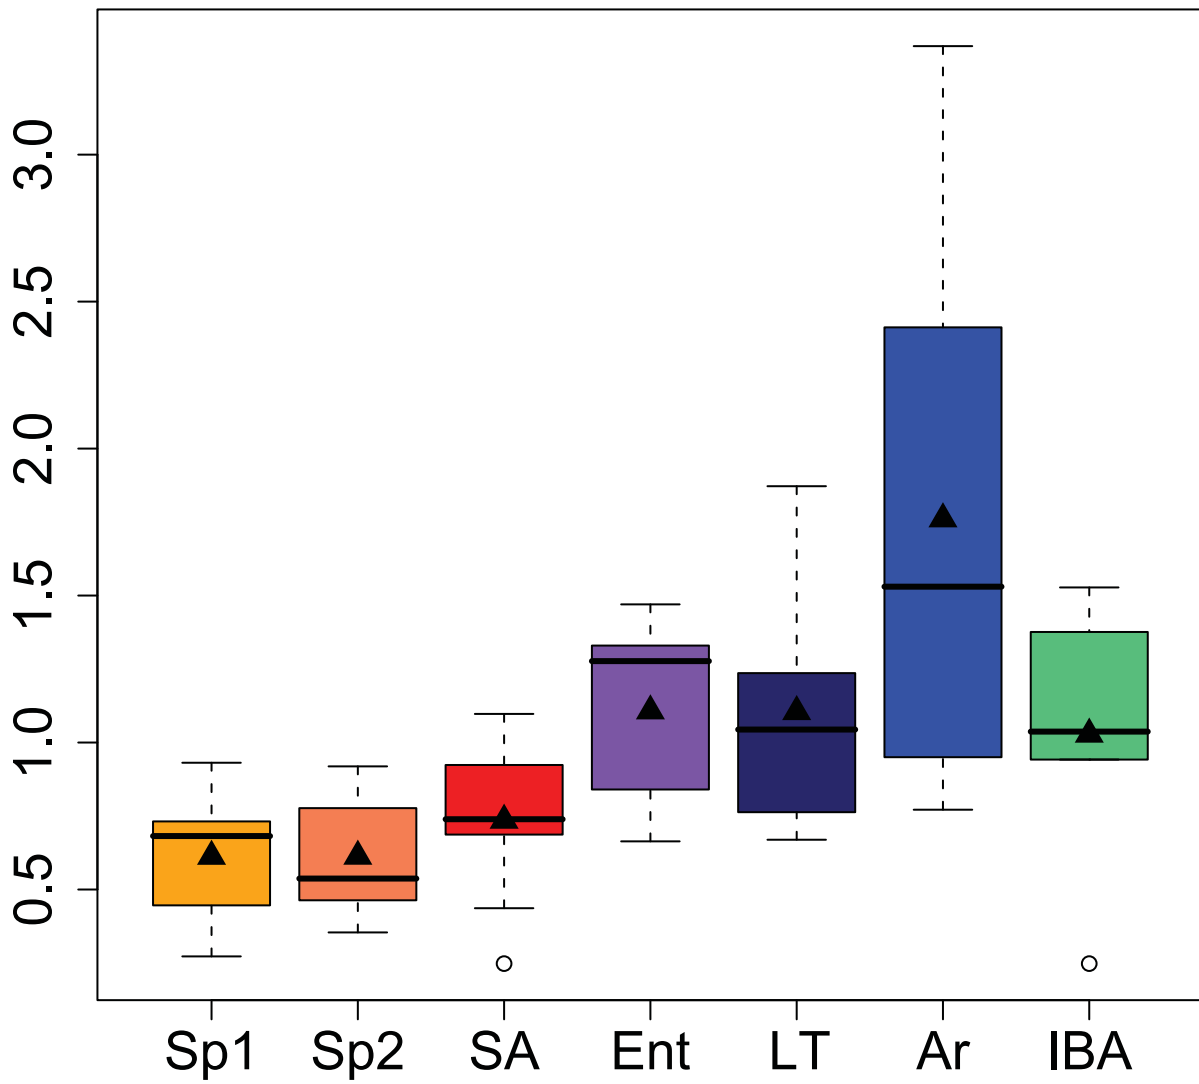



# 2-linoleoylglycerol-2-monolinolein-

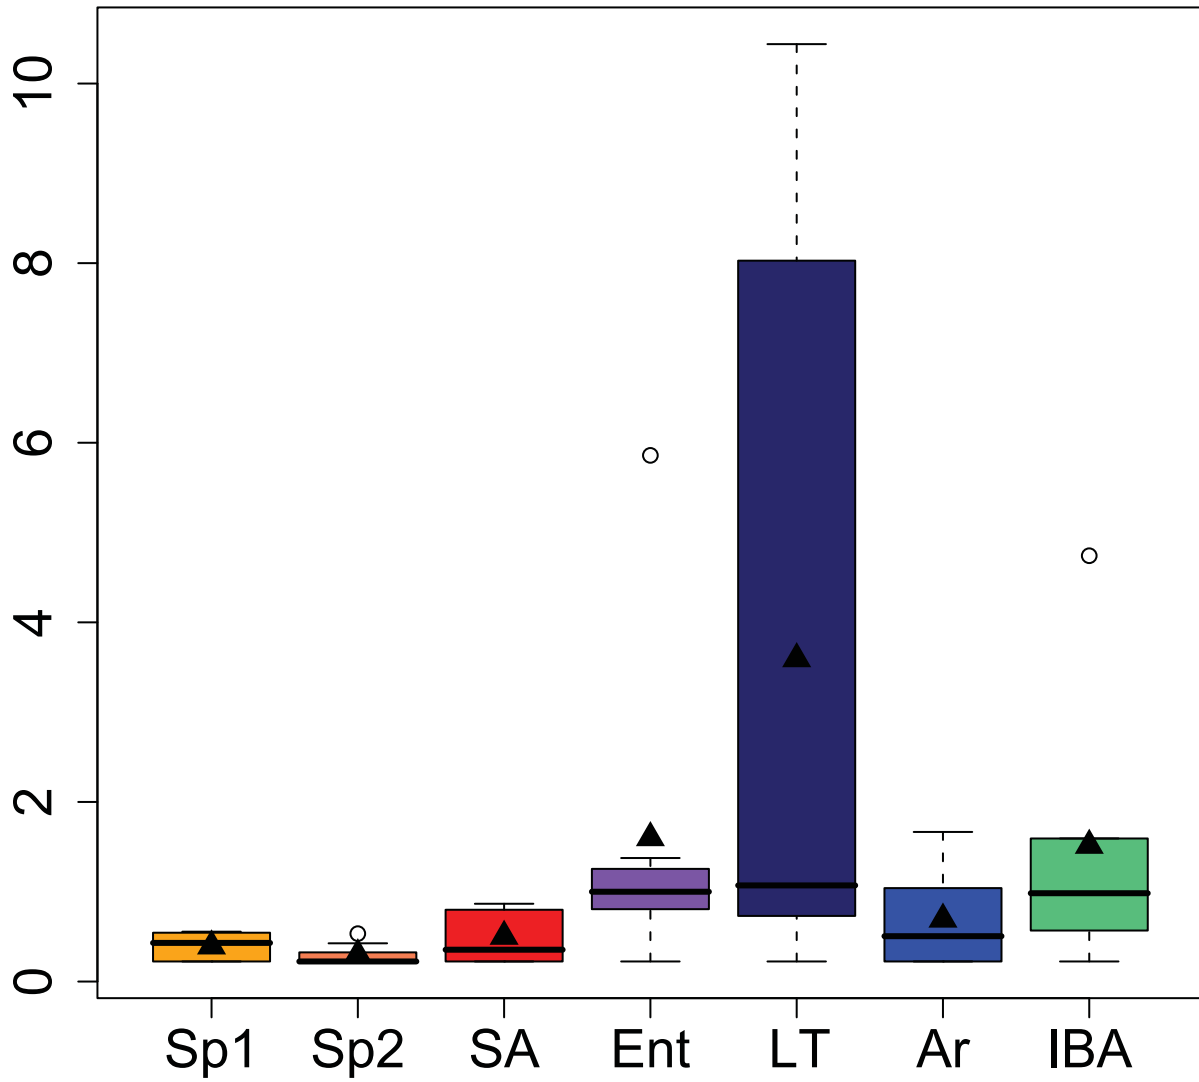

# 7-beta-hydroxycholesterol

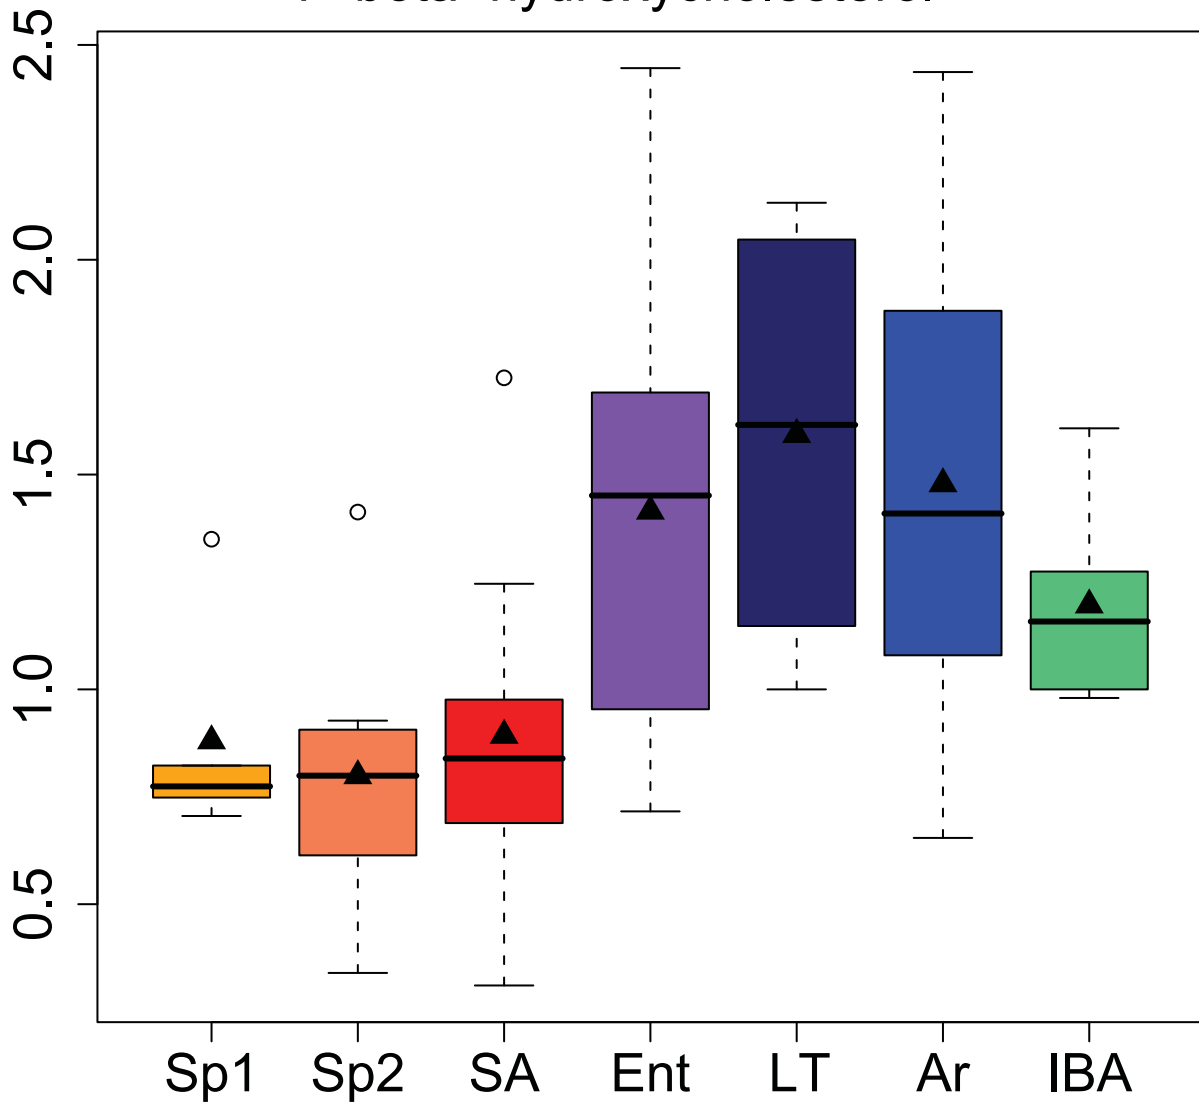

# androsterone sulfate

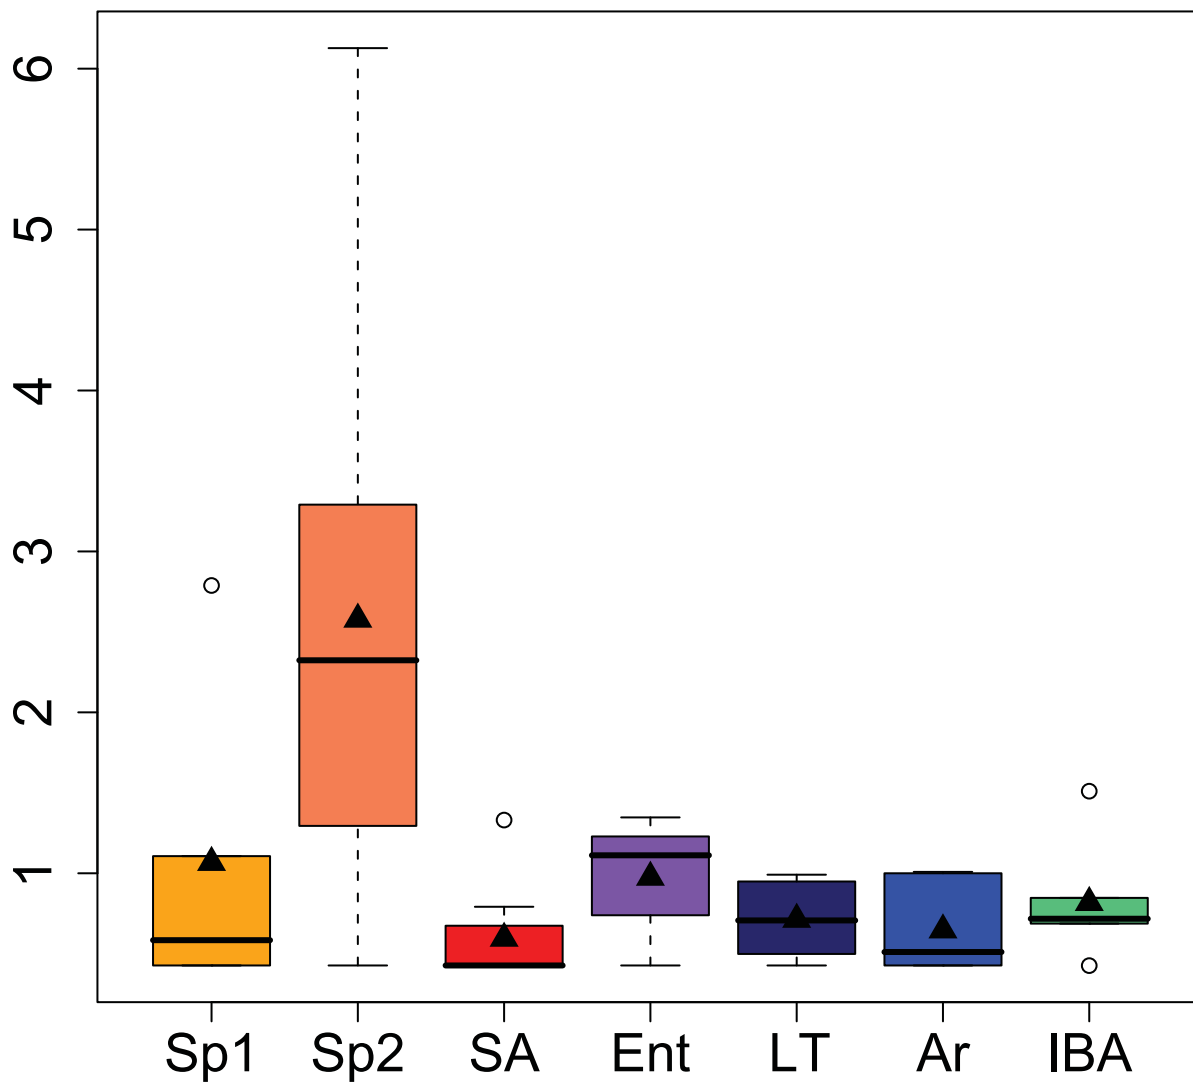

# beta-sitosterol

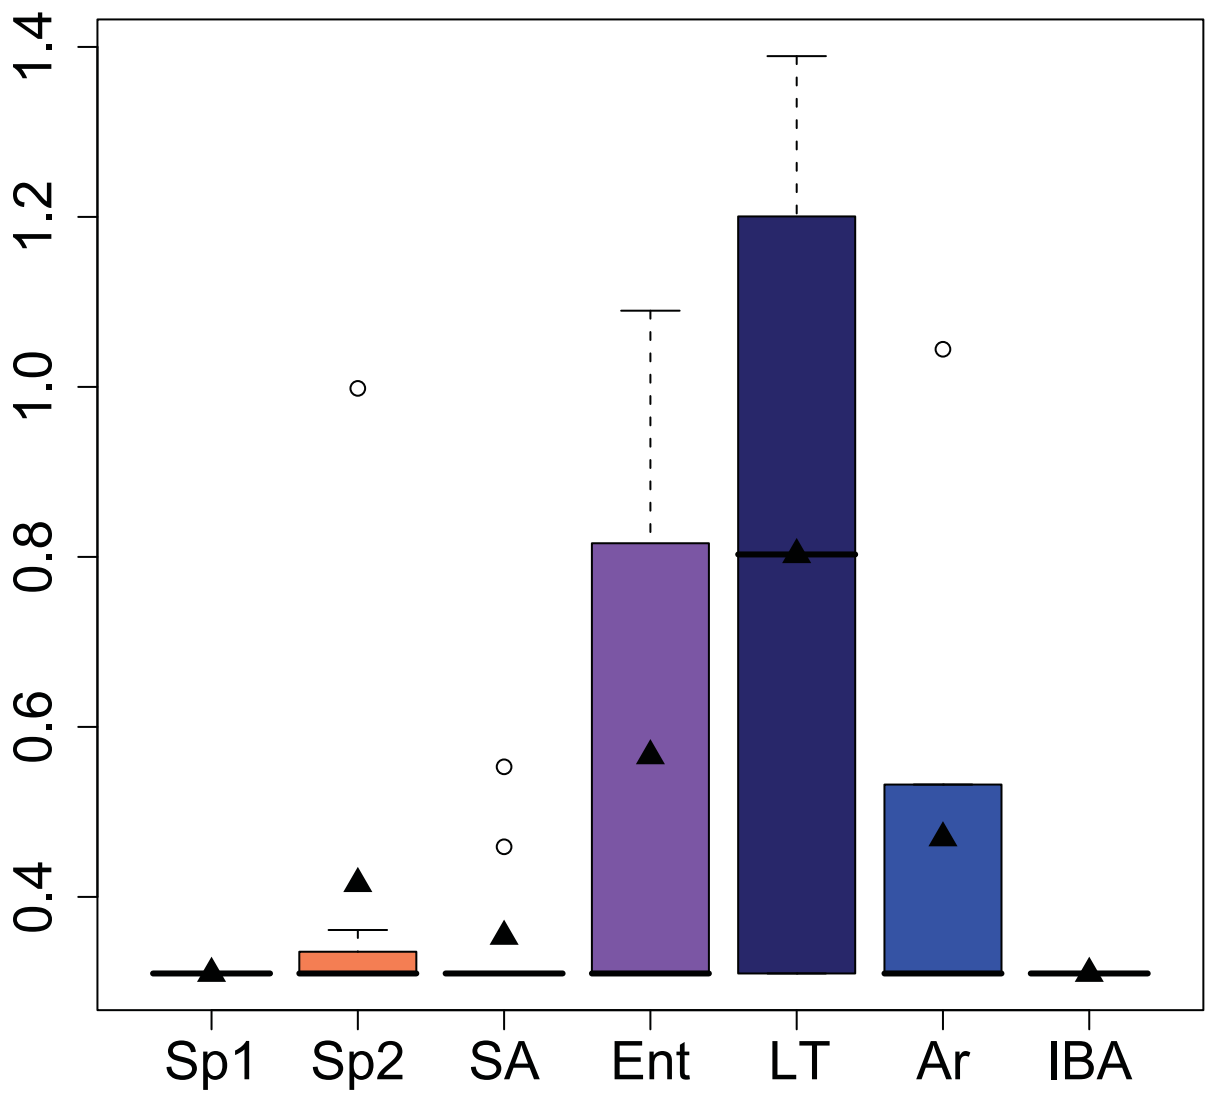

# cholesterol

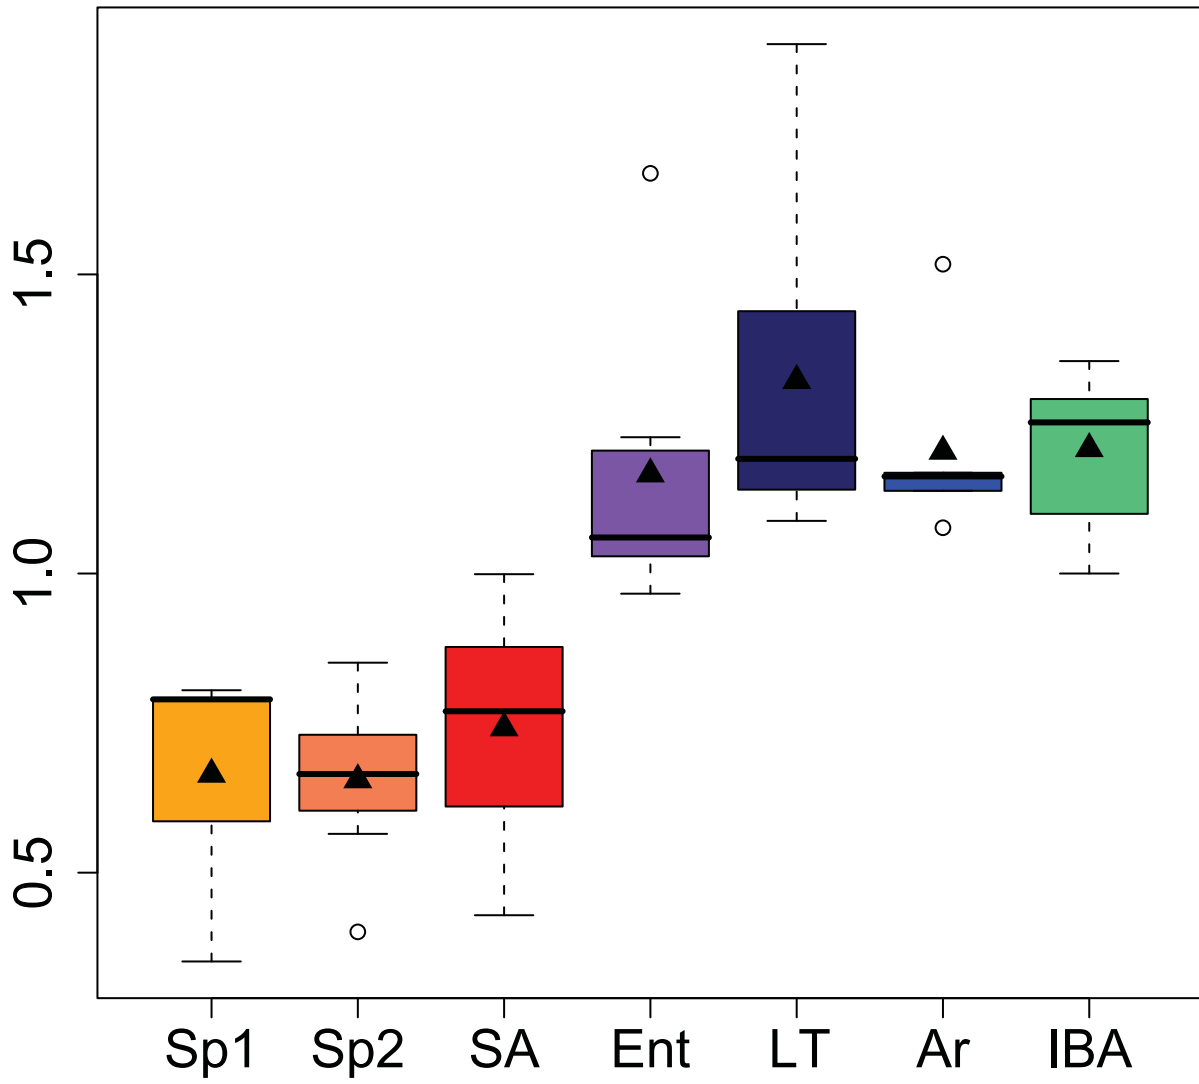

# inosine

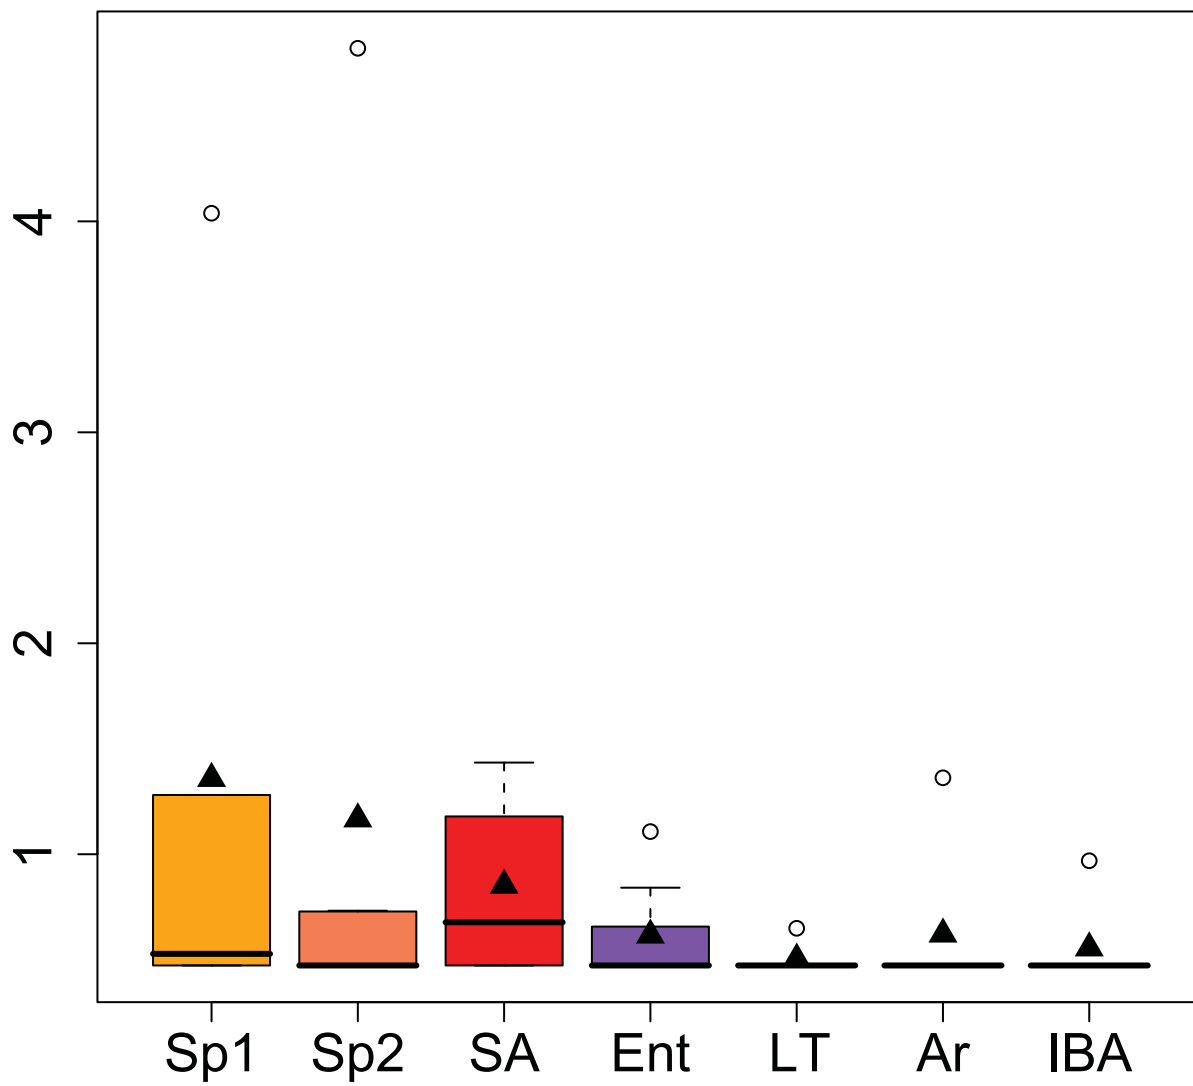

# xanthine

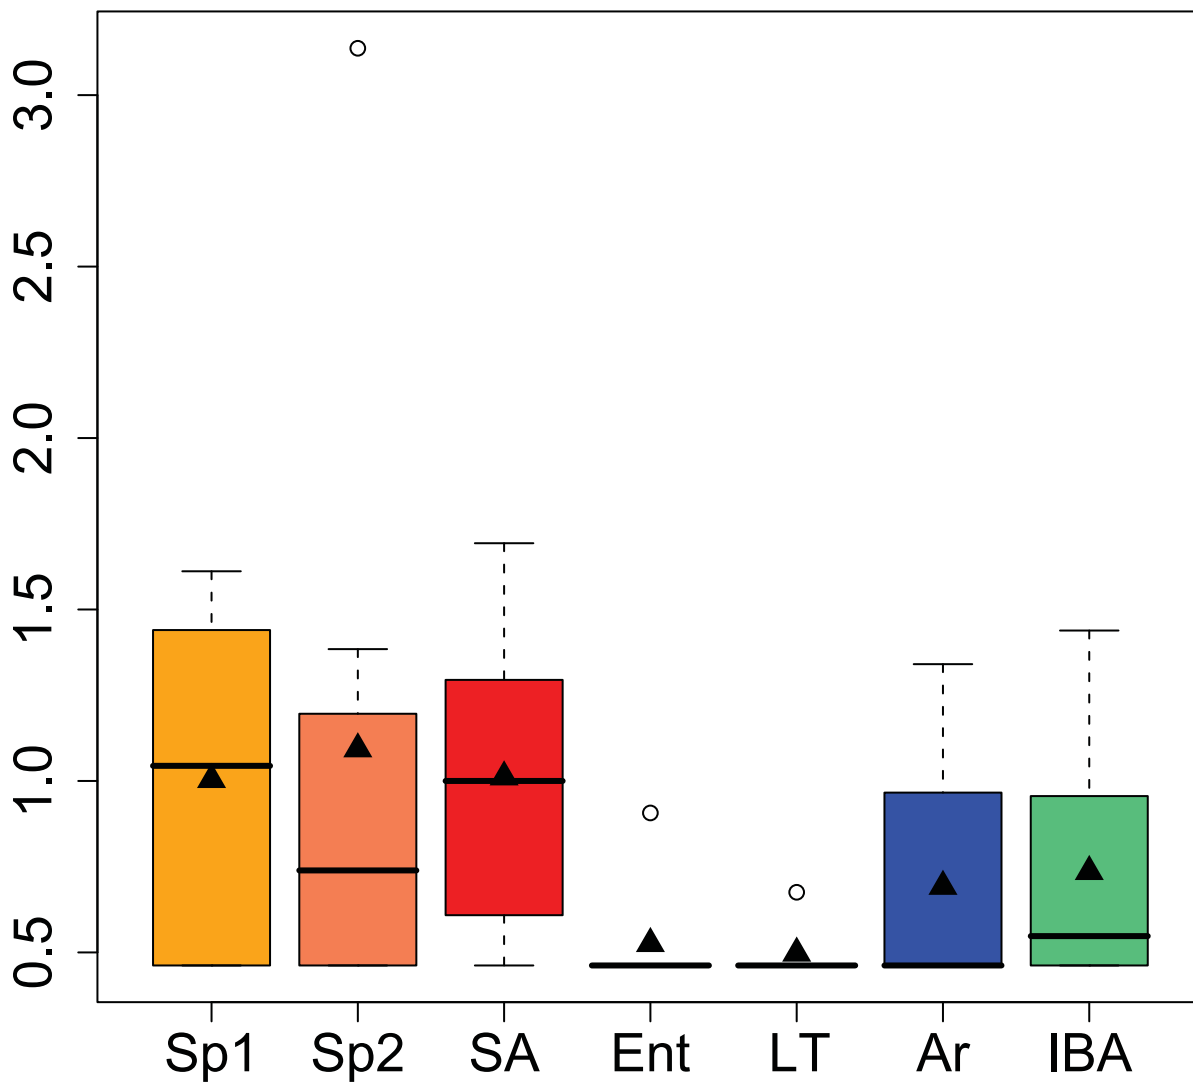

# adenosine

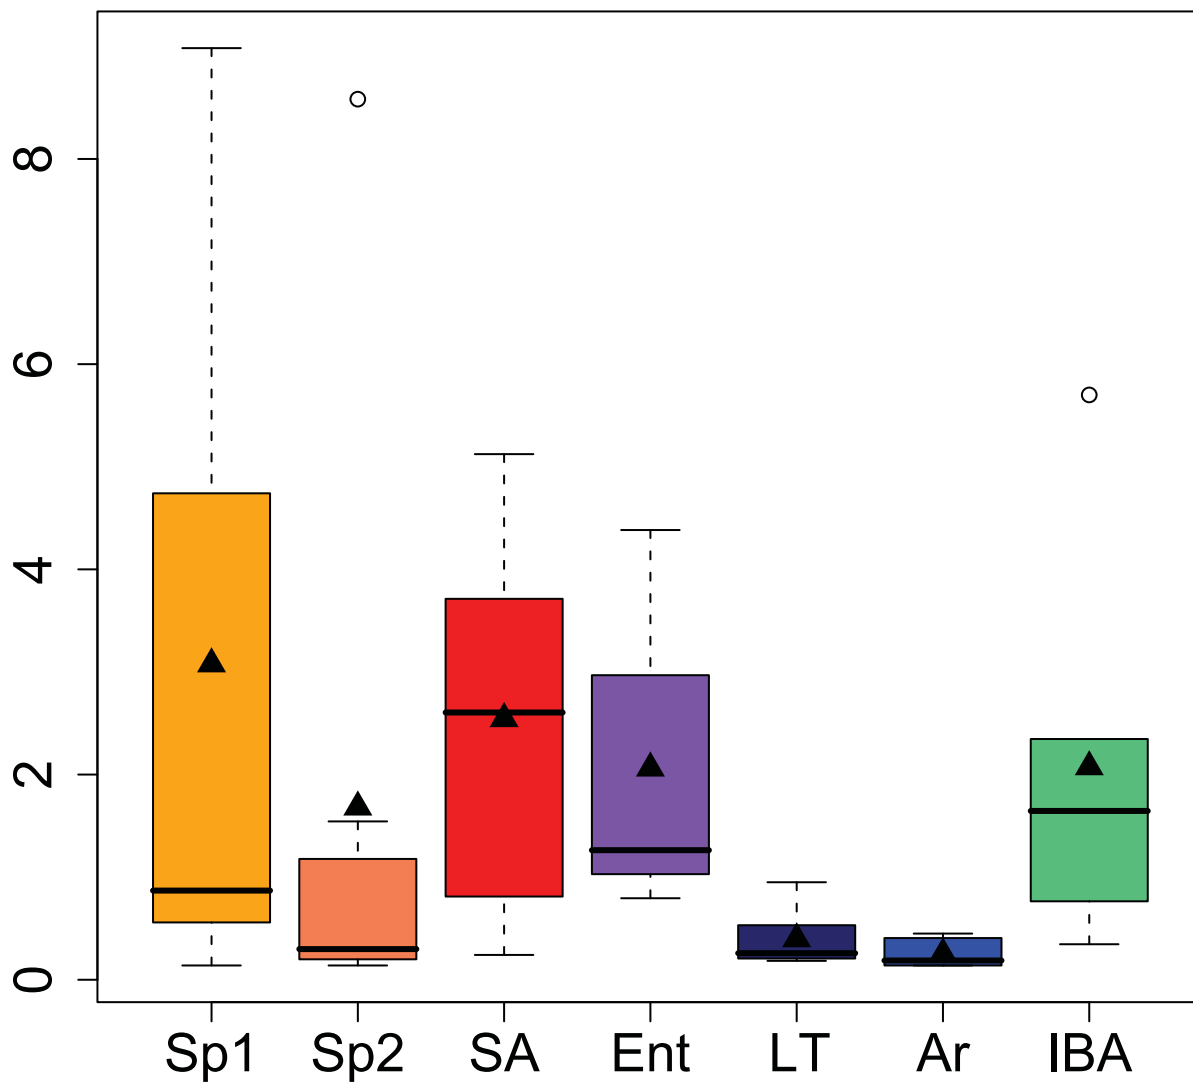



adenosine 5'-monophosphate (AMP)

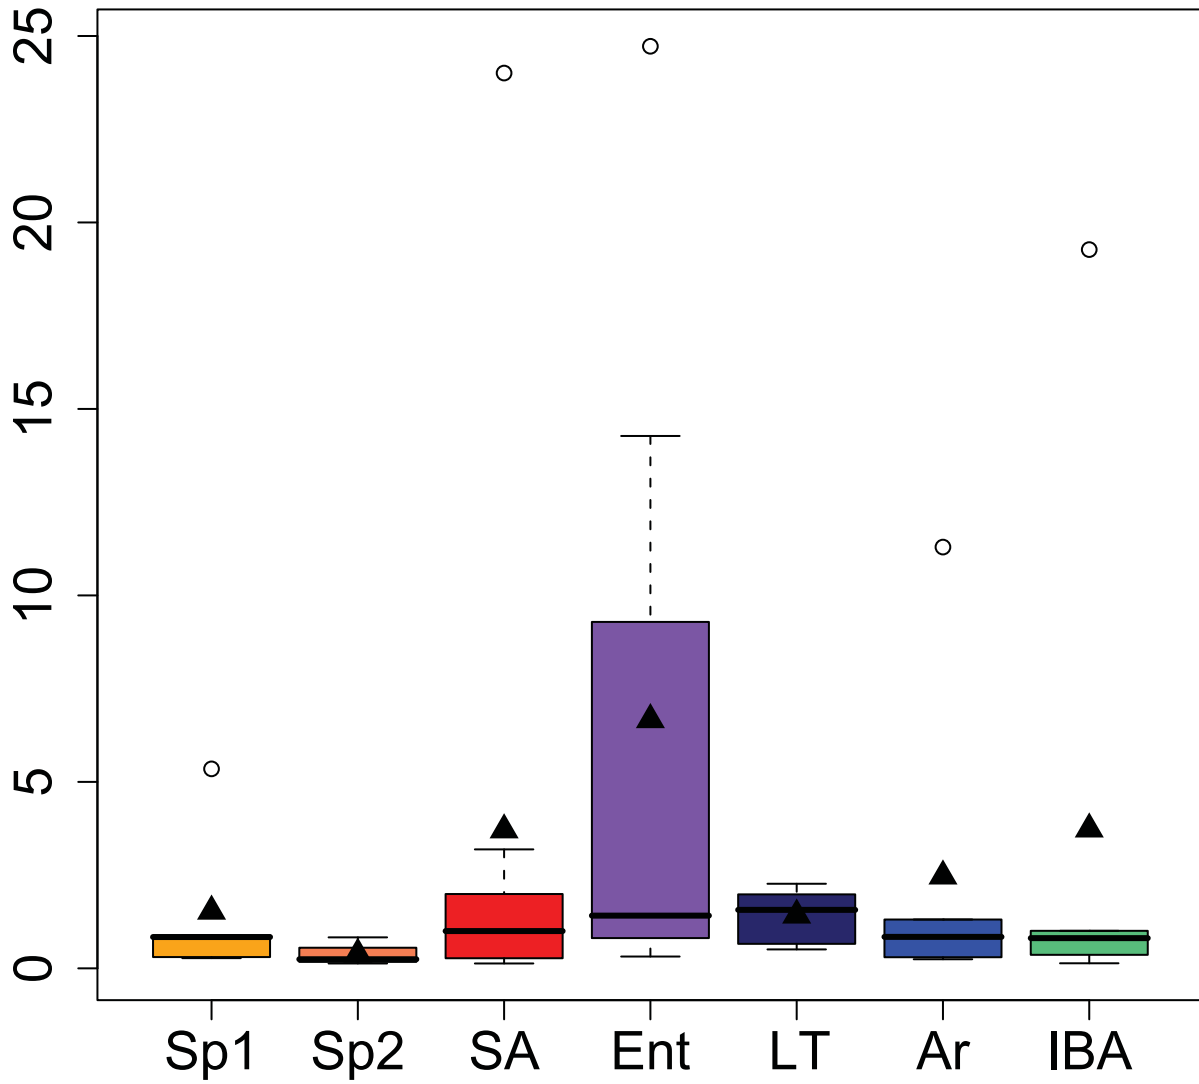

# allantoin

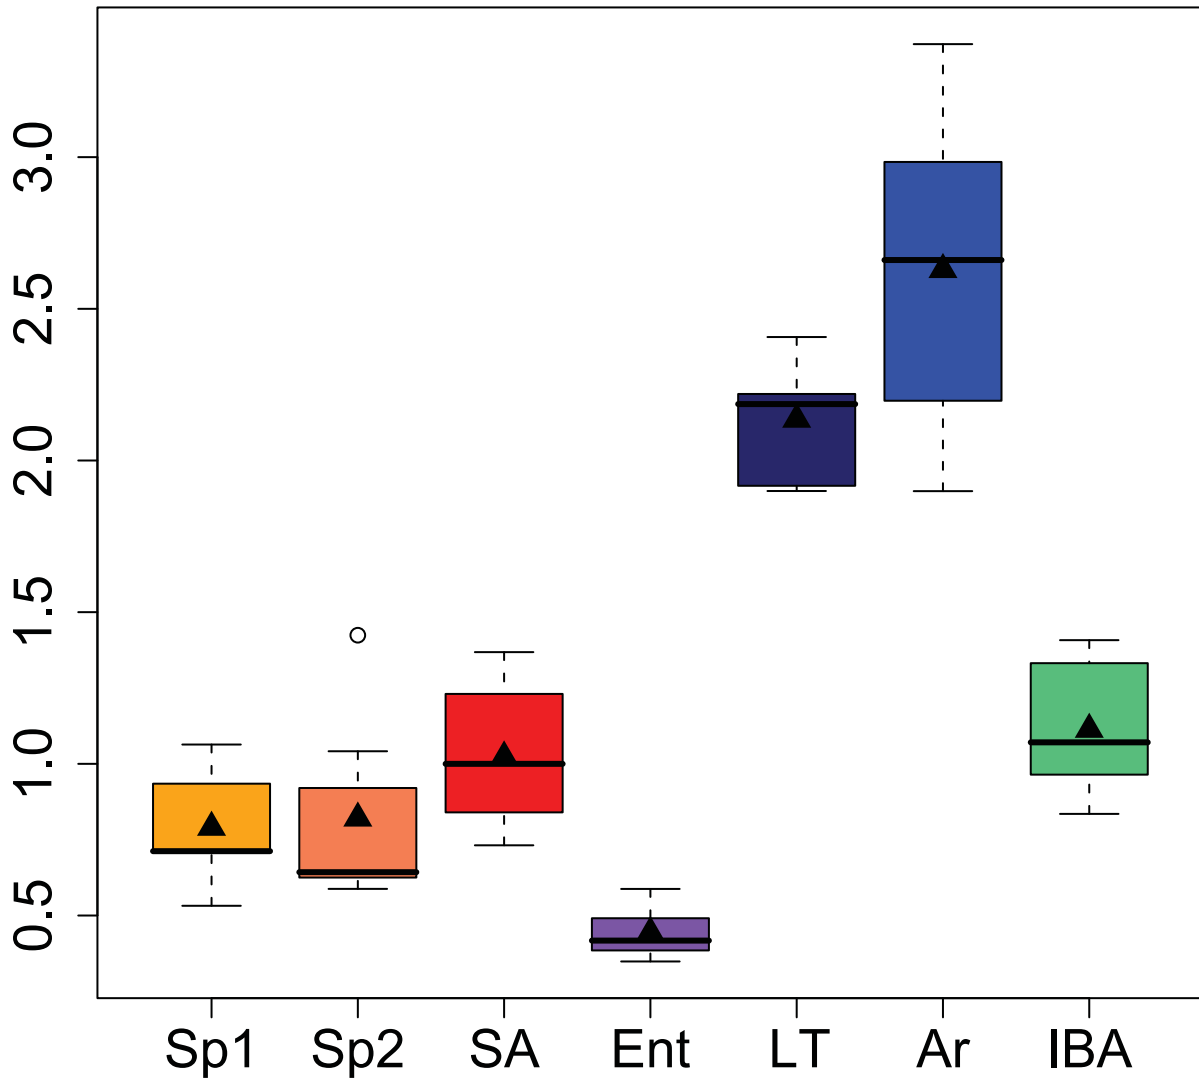

# urate

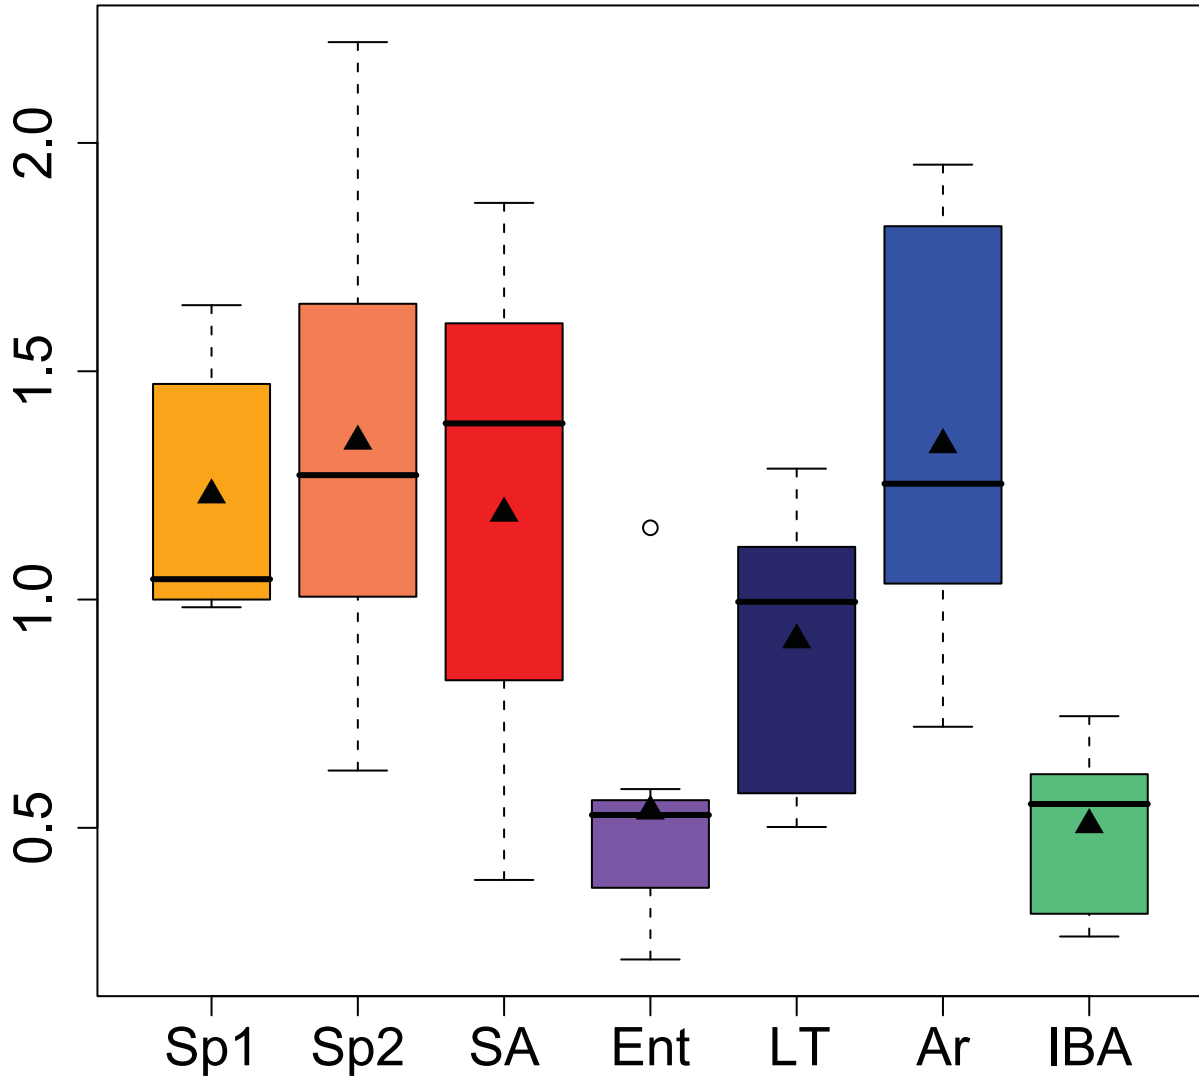

# glutamylvaline

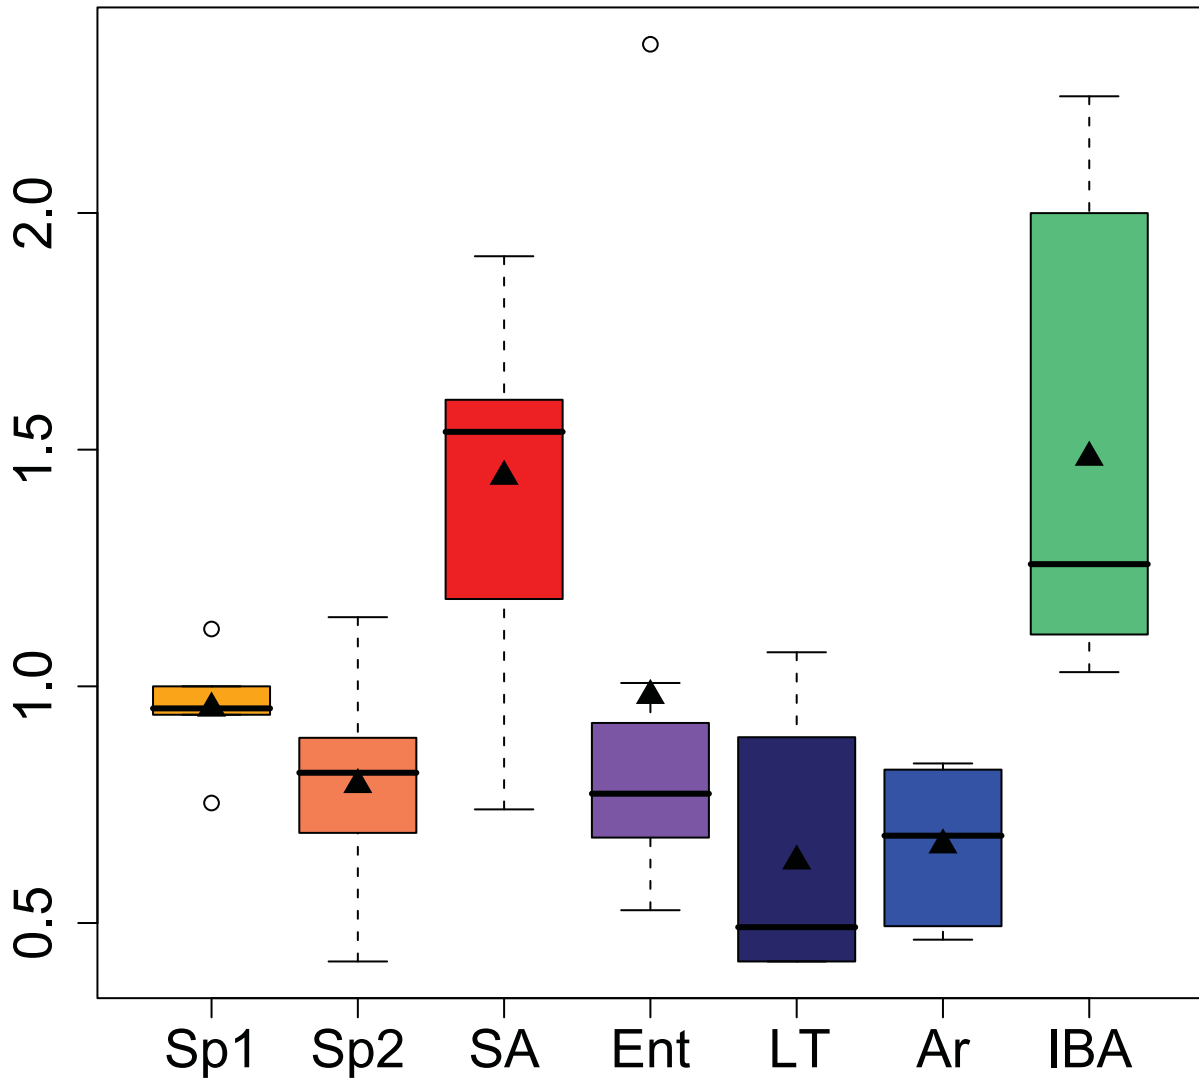

# glycylproline

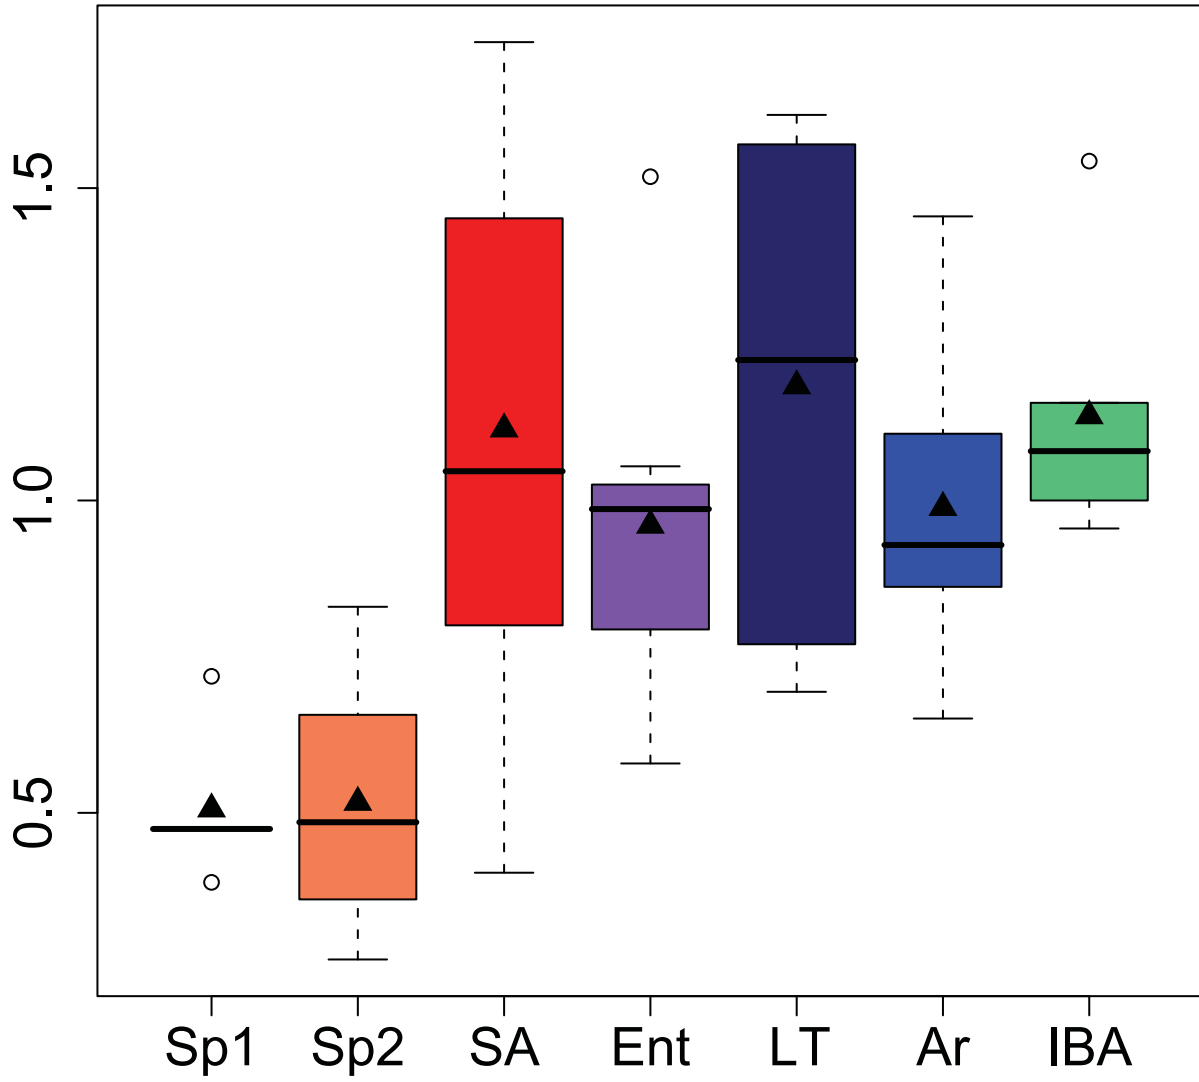

# pro-hydroxy-pro

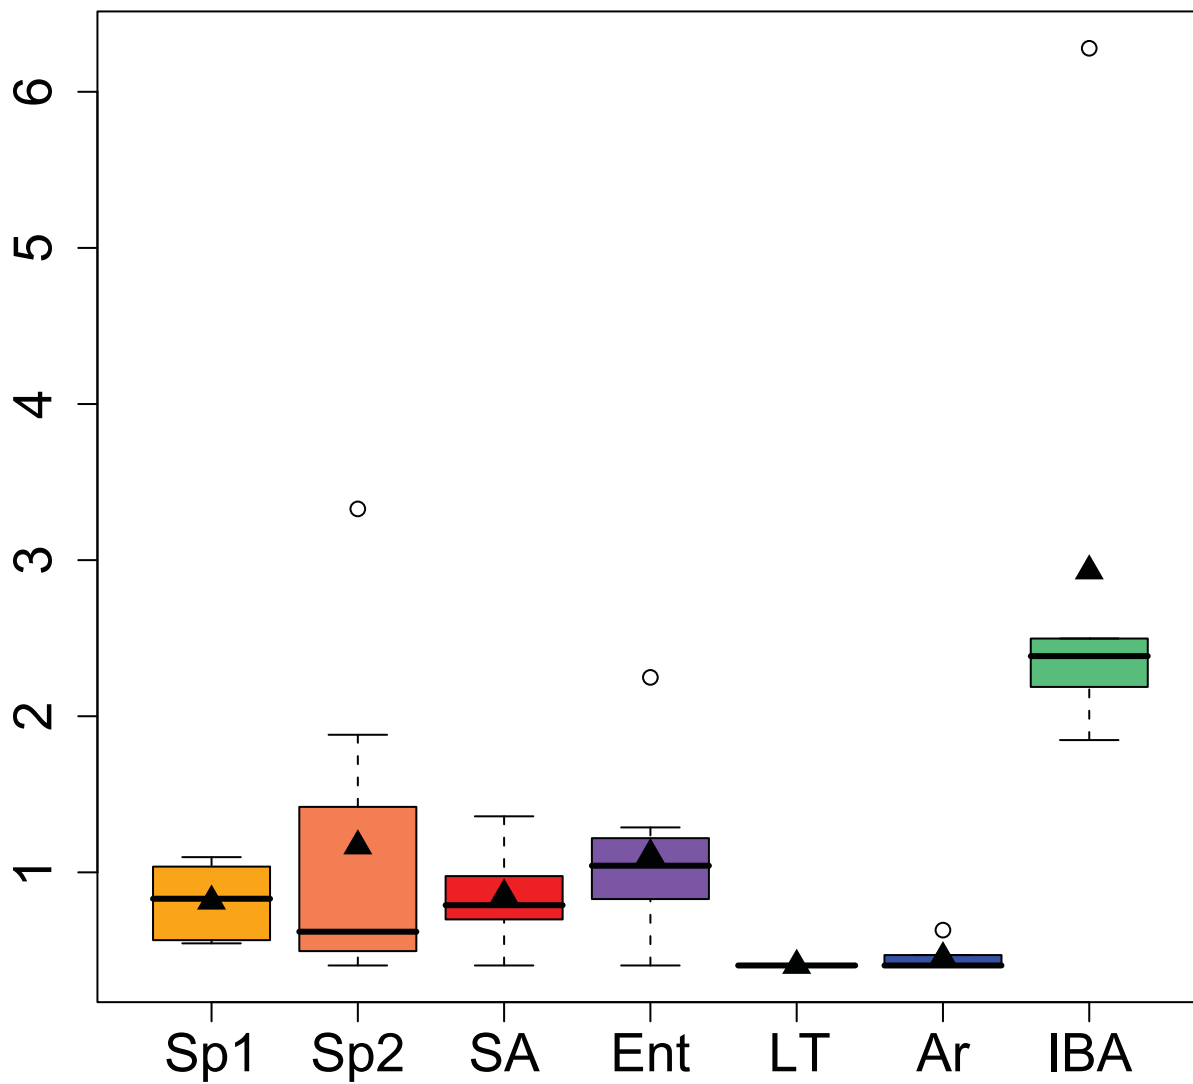

# gamma-glutamylglutamine

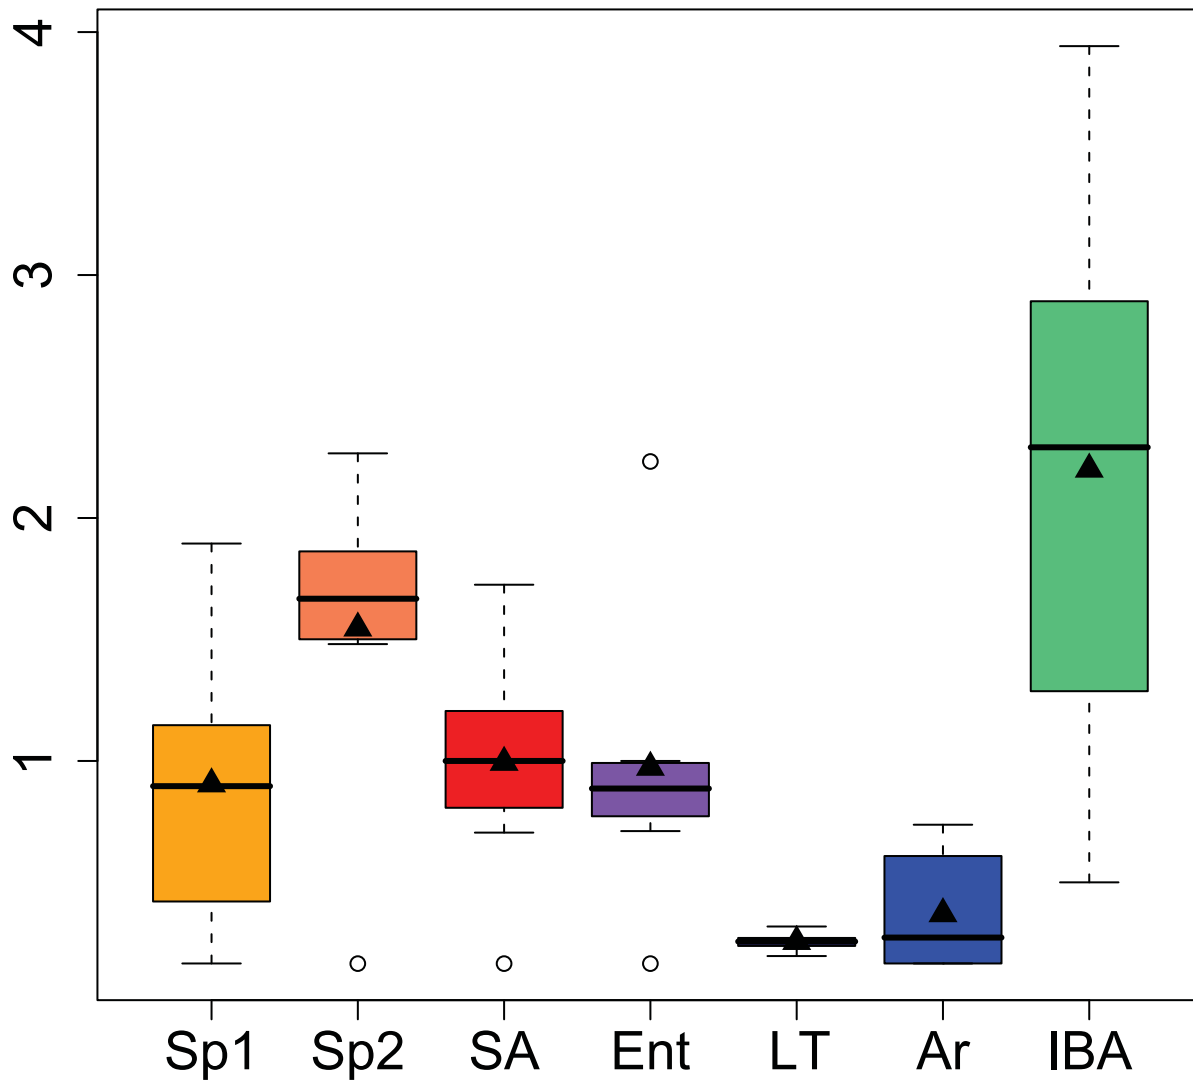

gamma-glutamylisoleucine\*

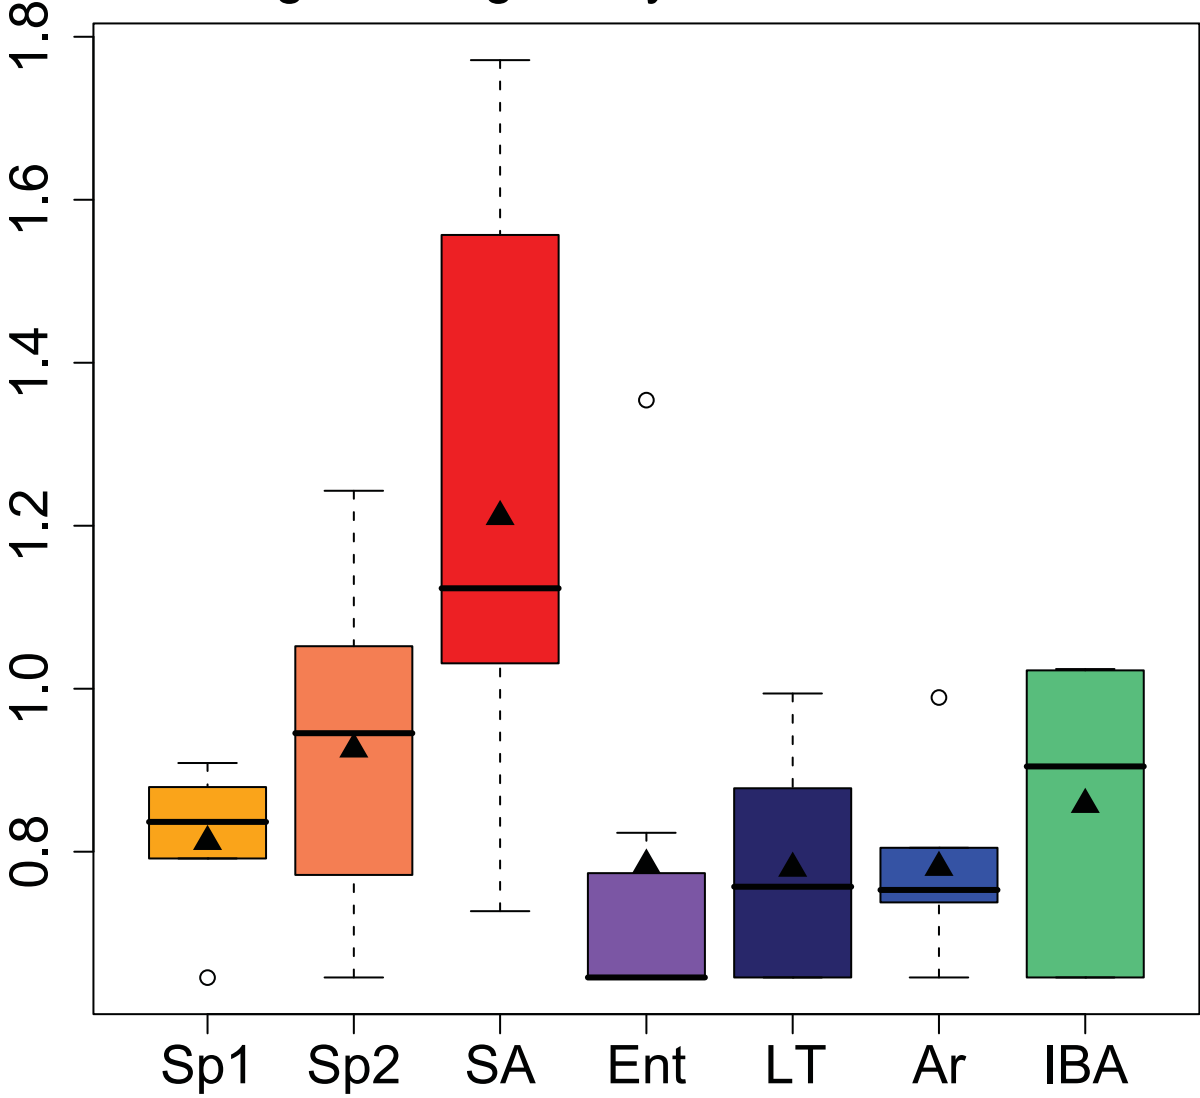



# gamma-glutamylleucine

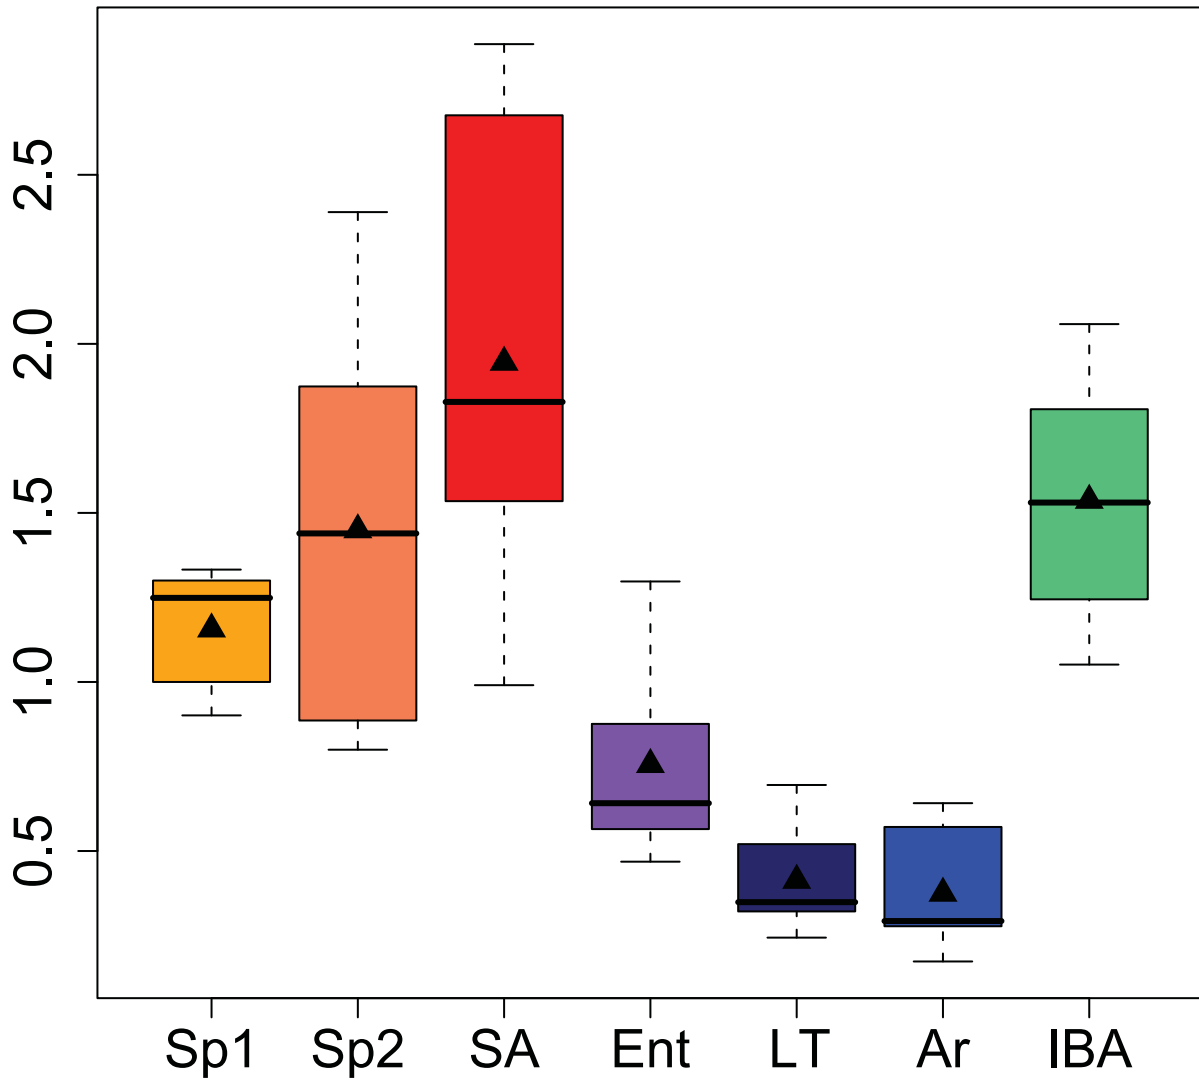

# gamma-glutamylmethionine\*

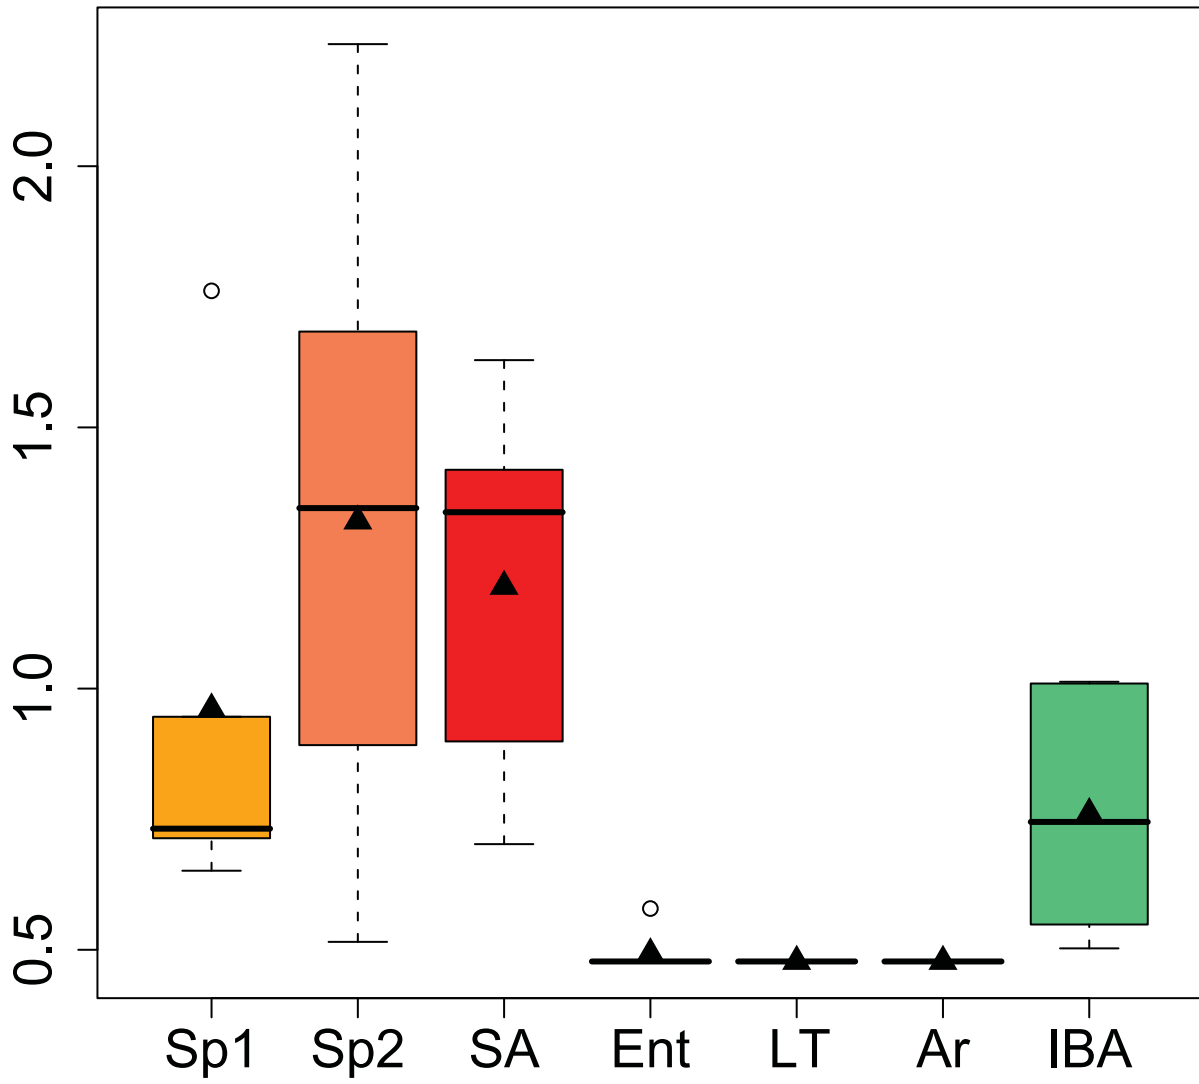

# gamma-glutamylphenylalanine

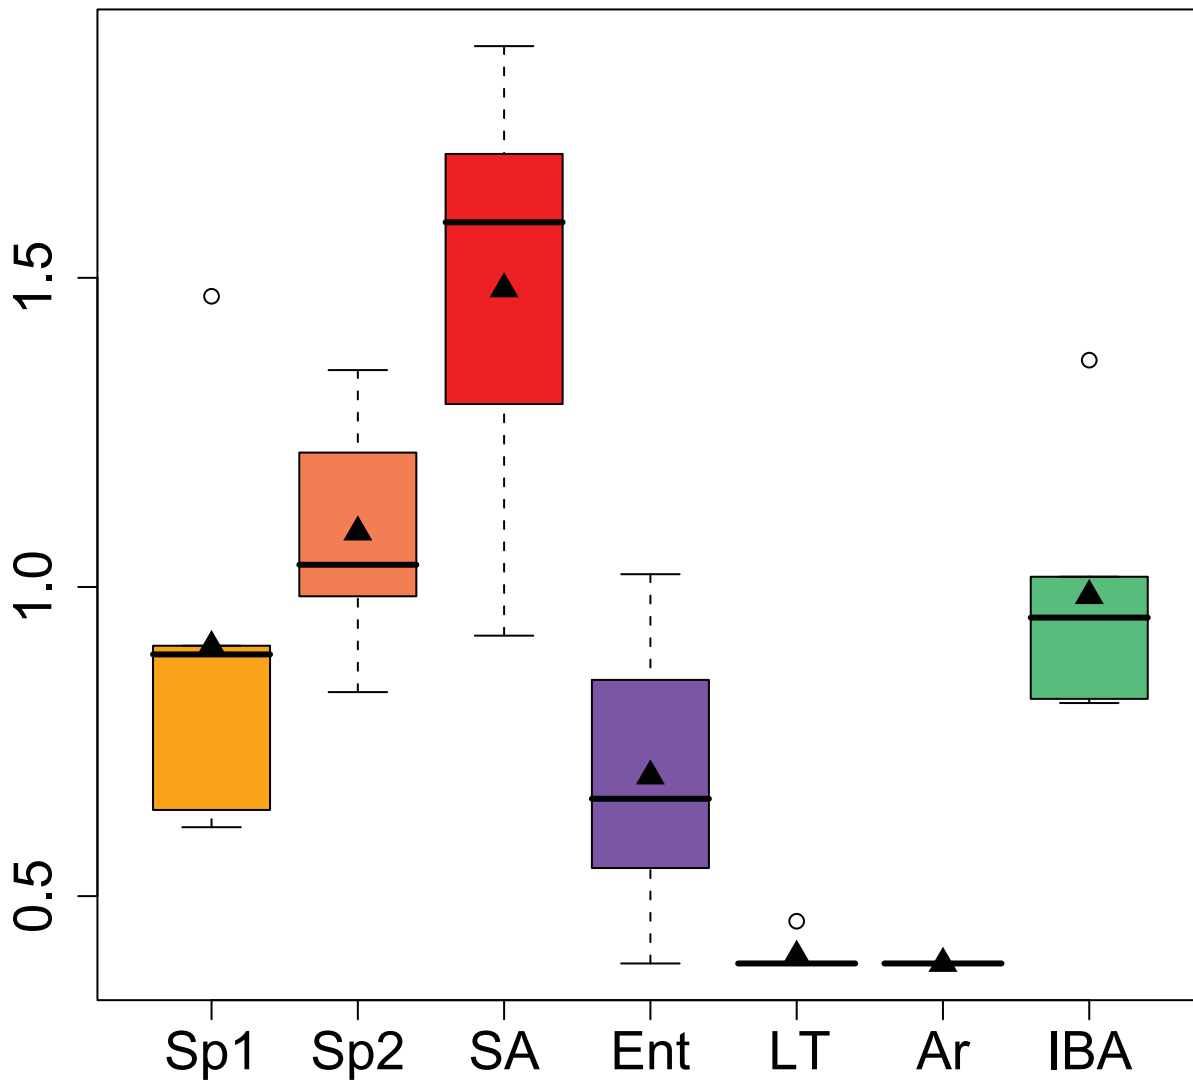

gamma-glutamylthreonine\*

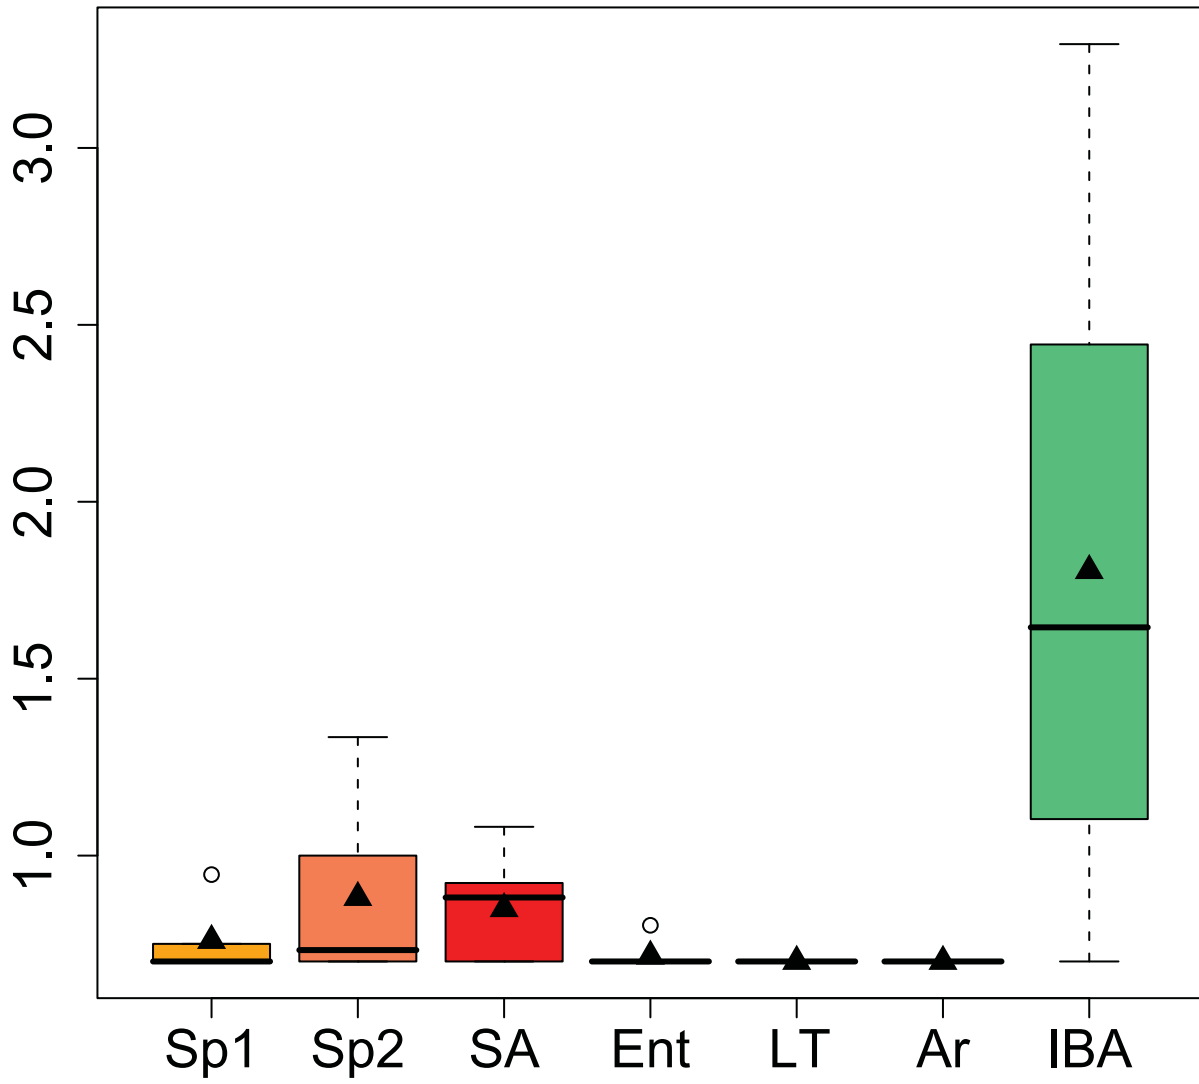

# gamma-glutamyltryptophan

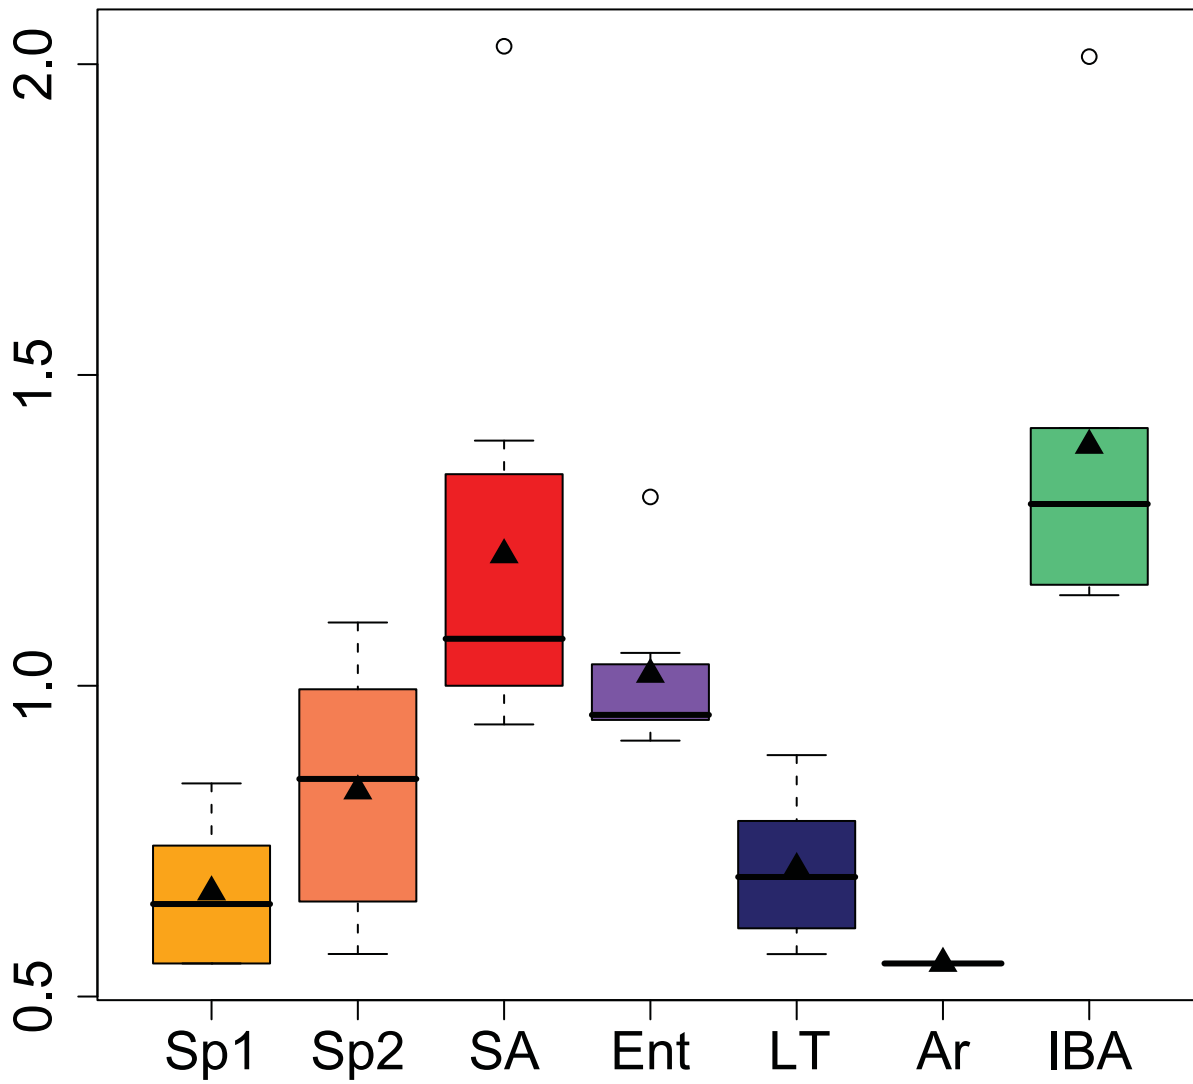

# gamma-glutamyltyrosine

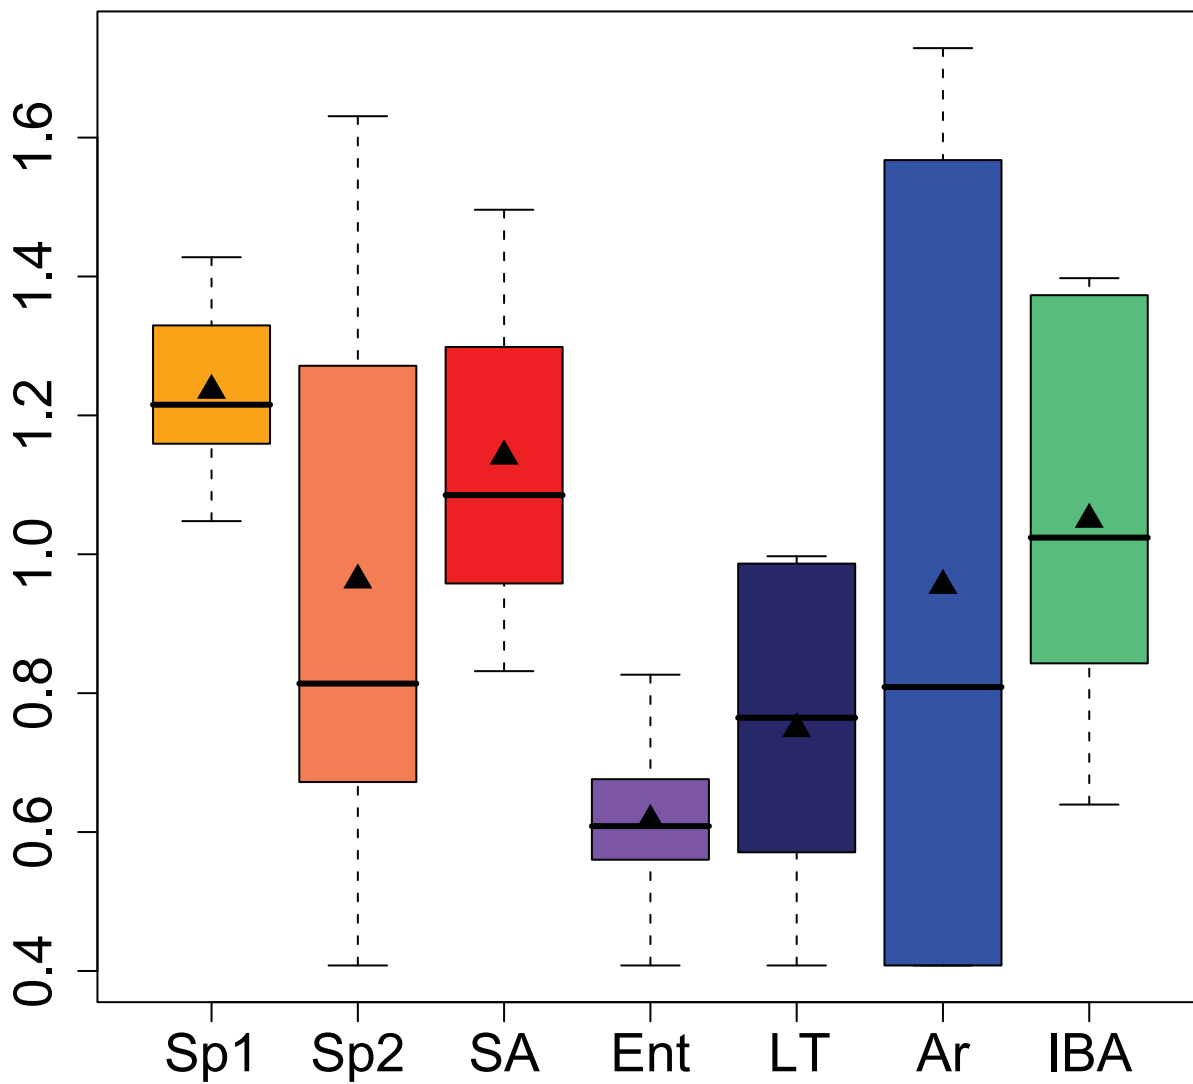

# catechol-sulfate

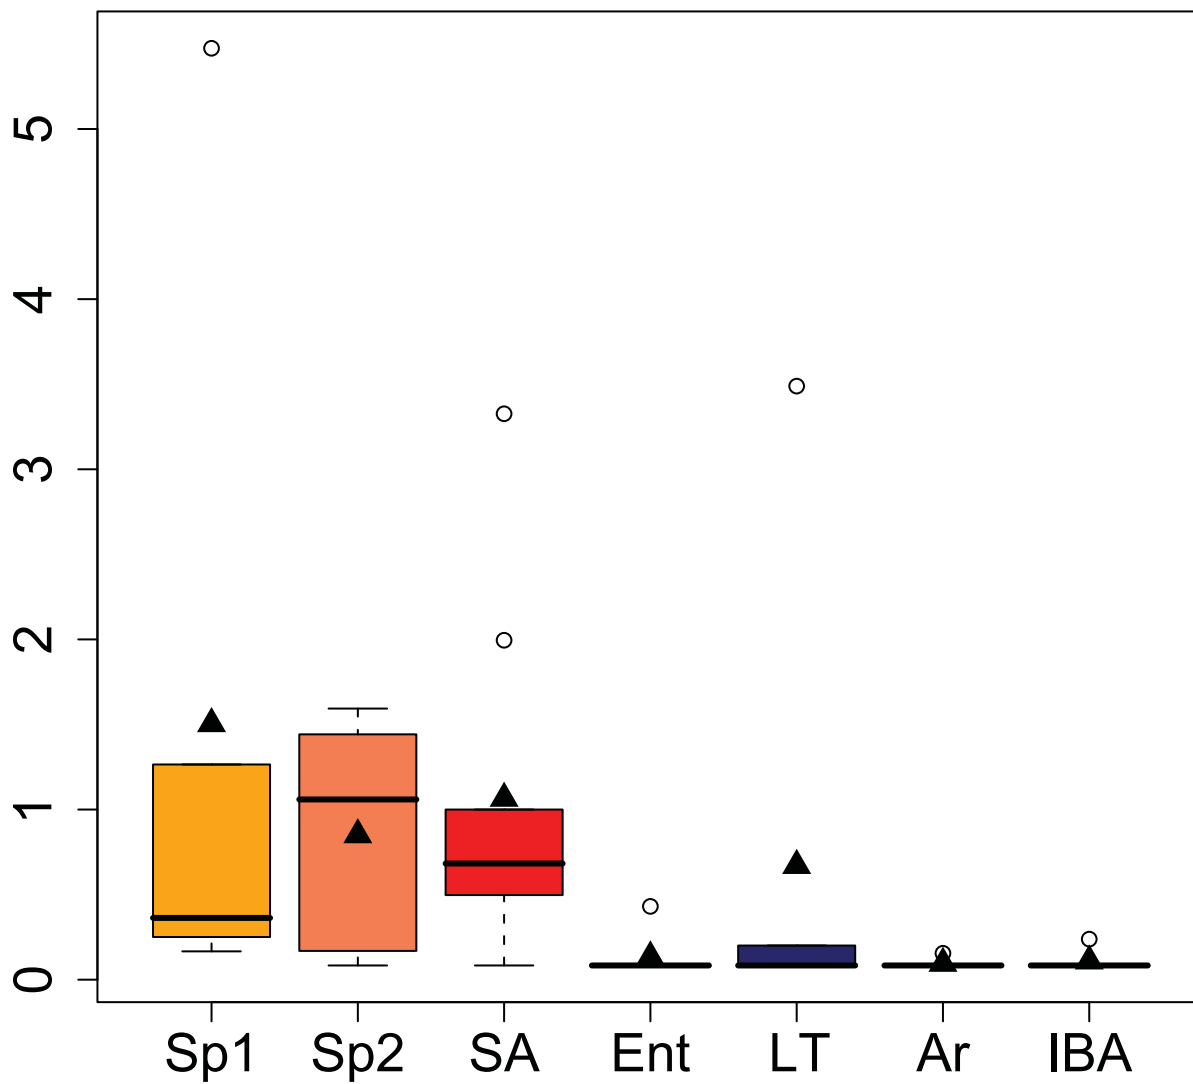

# hippurate

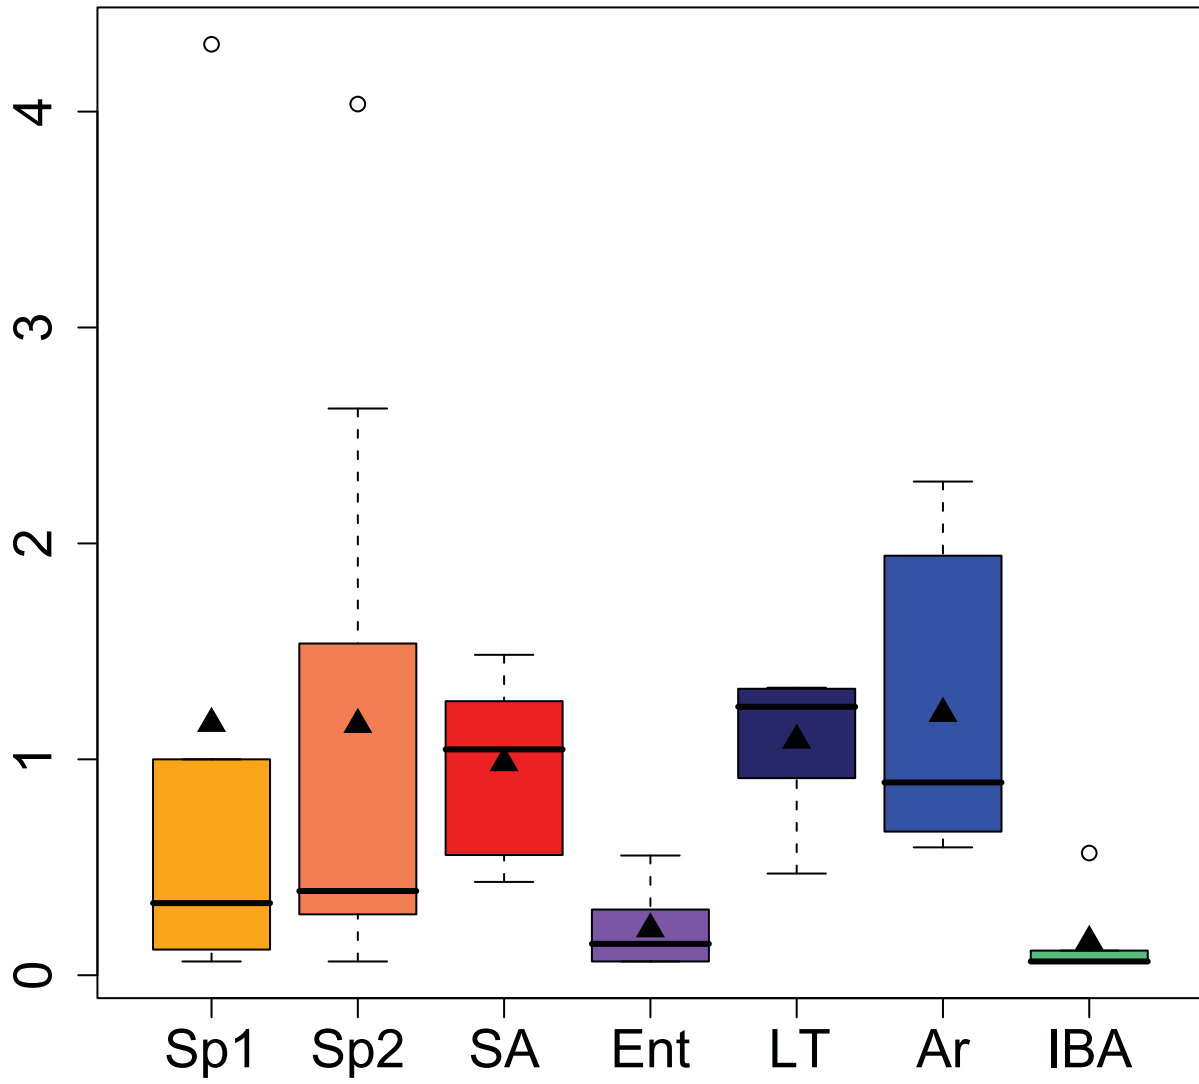



glycerol 2-phosphate

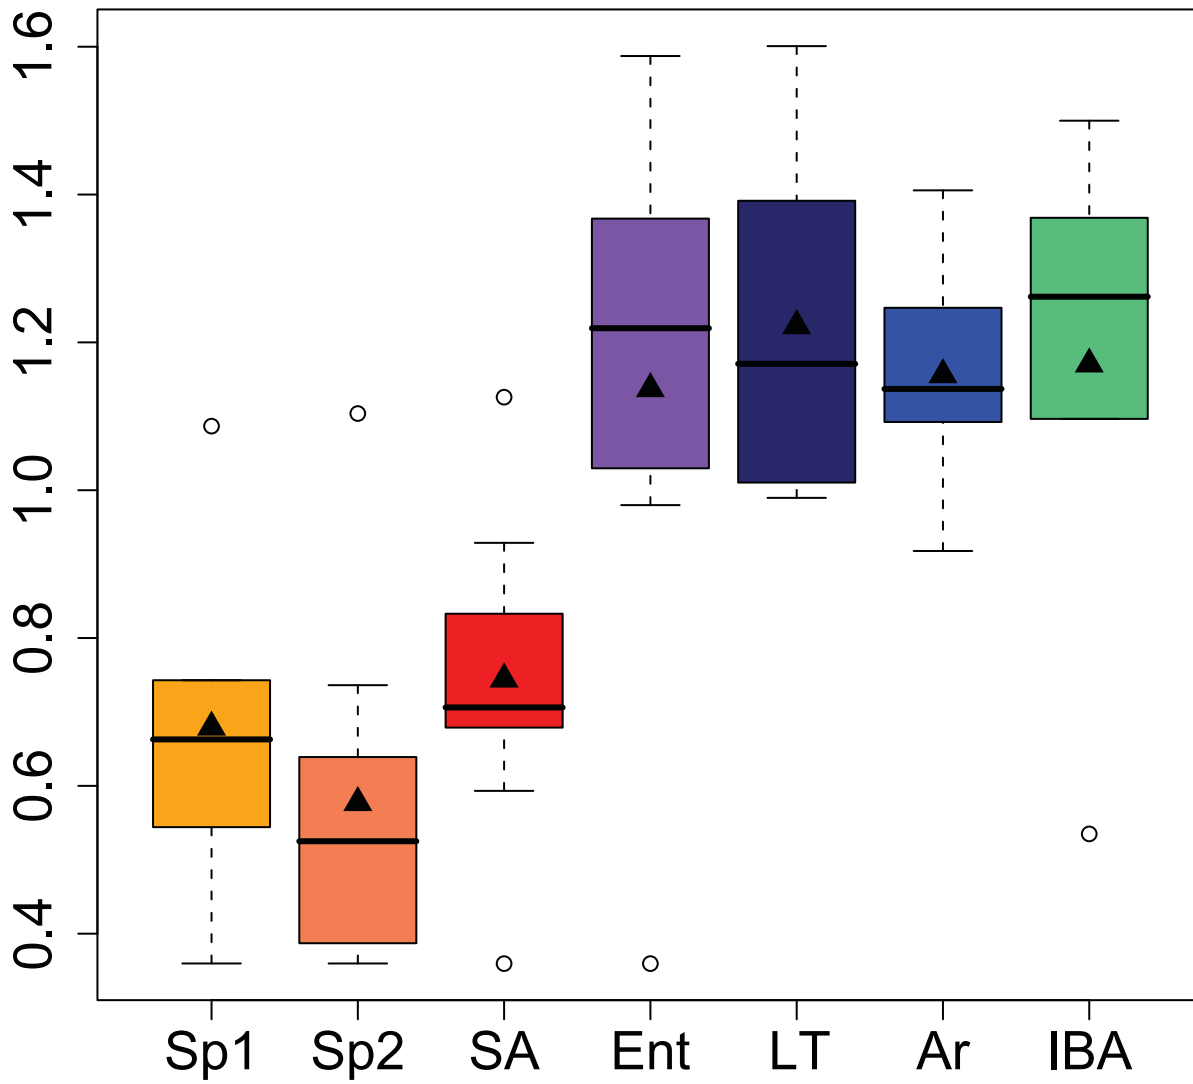

# phenol sulfate

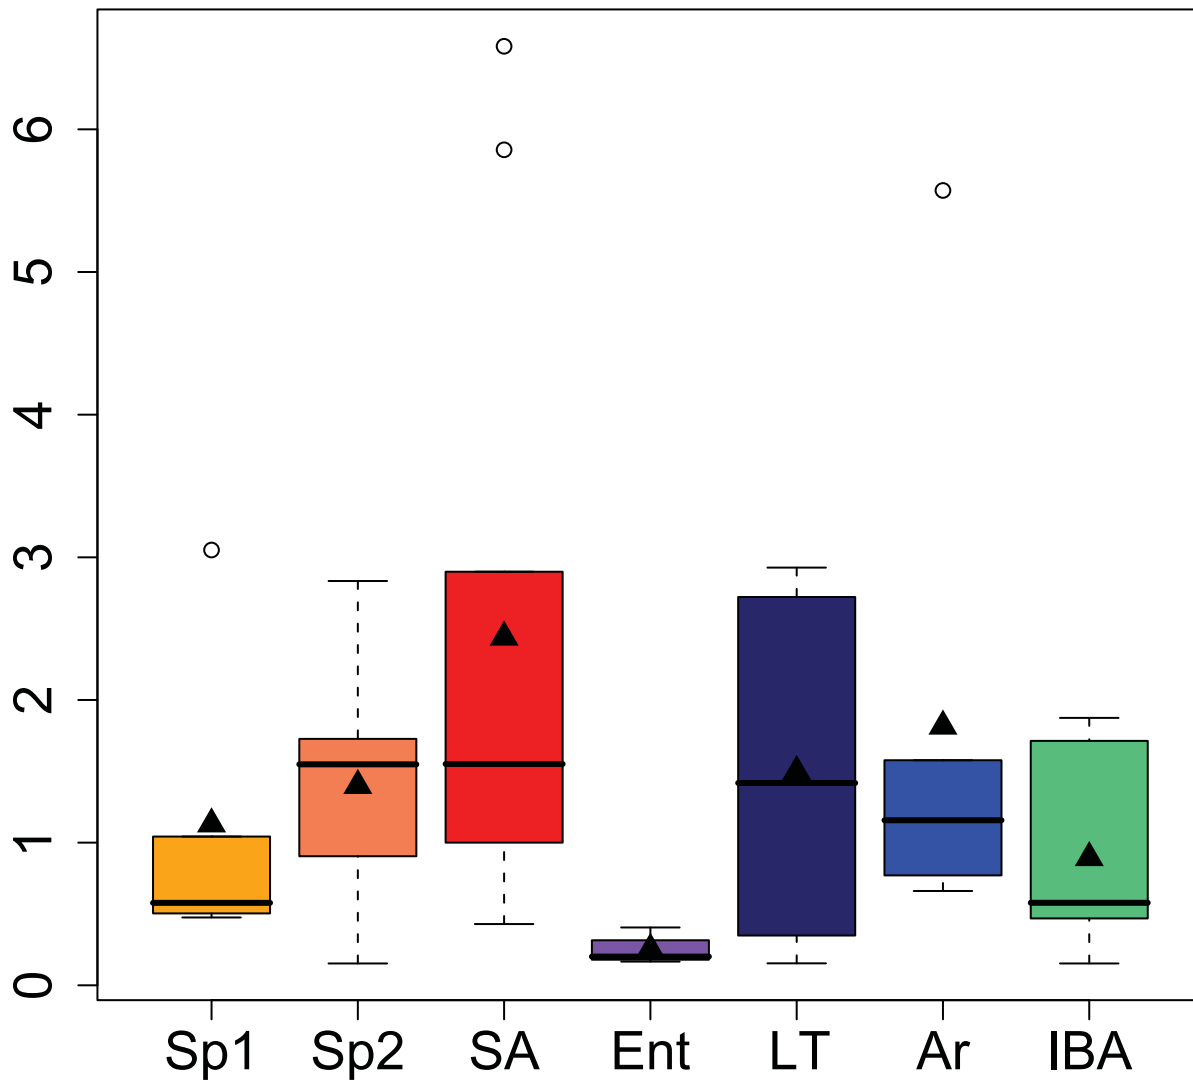

### 3-phenylpropionate (hydrocinnamate)

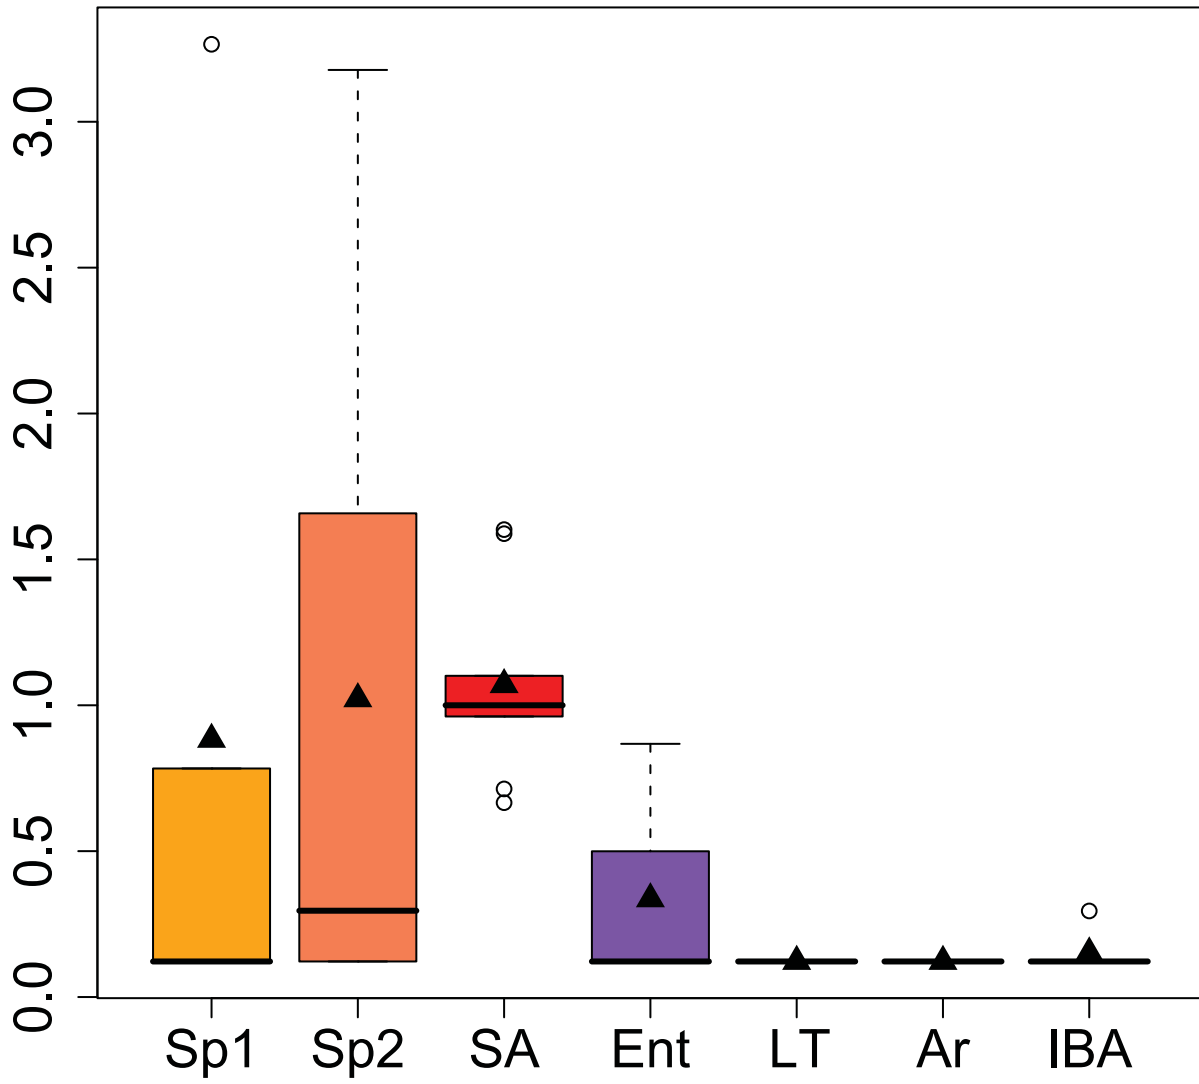



quinate

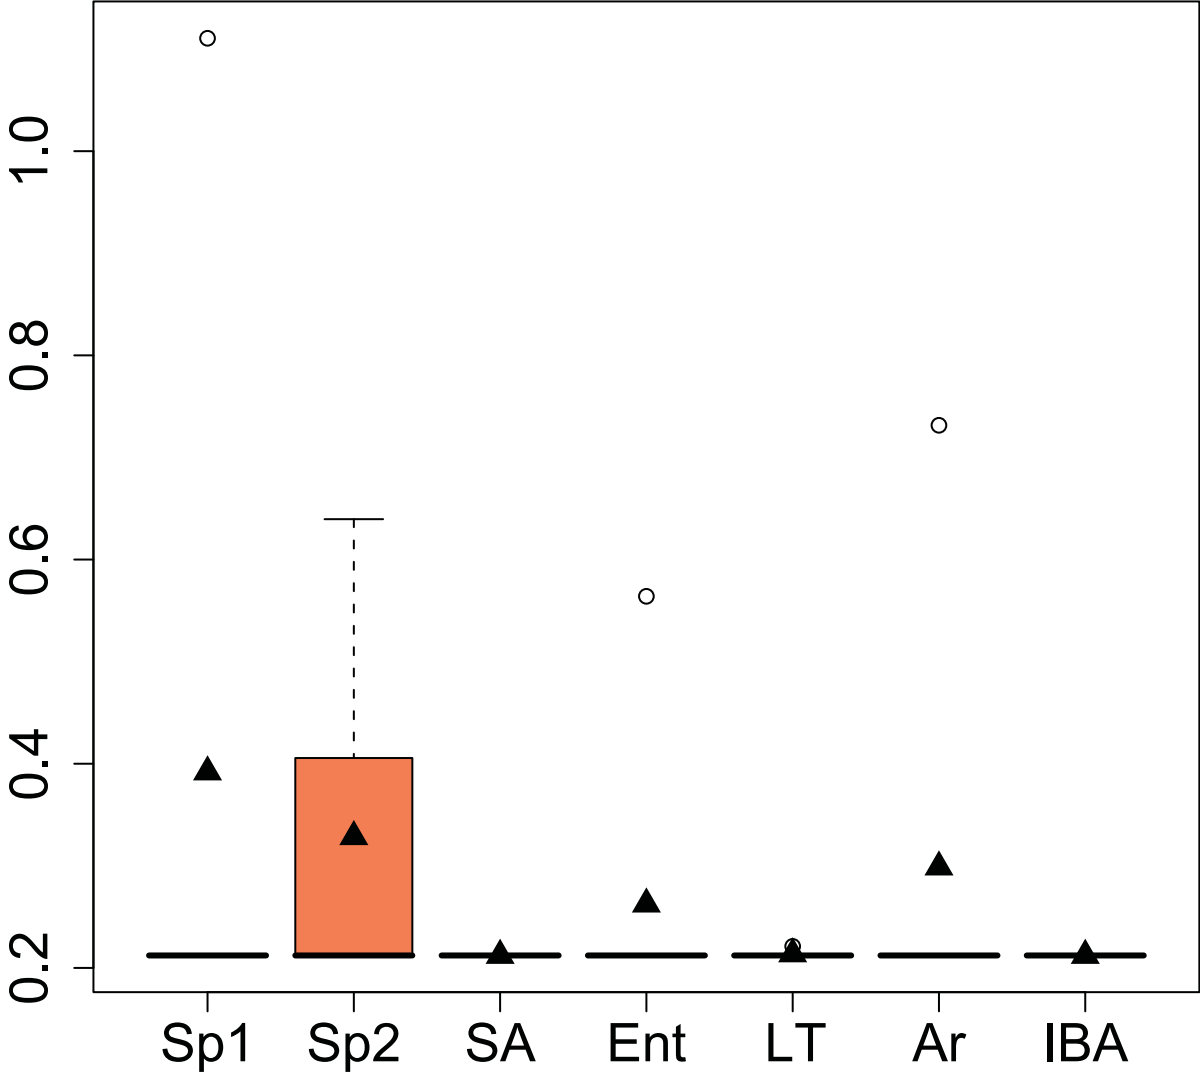

# erythritol

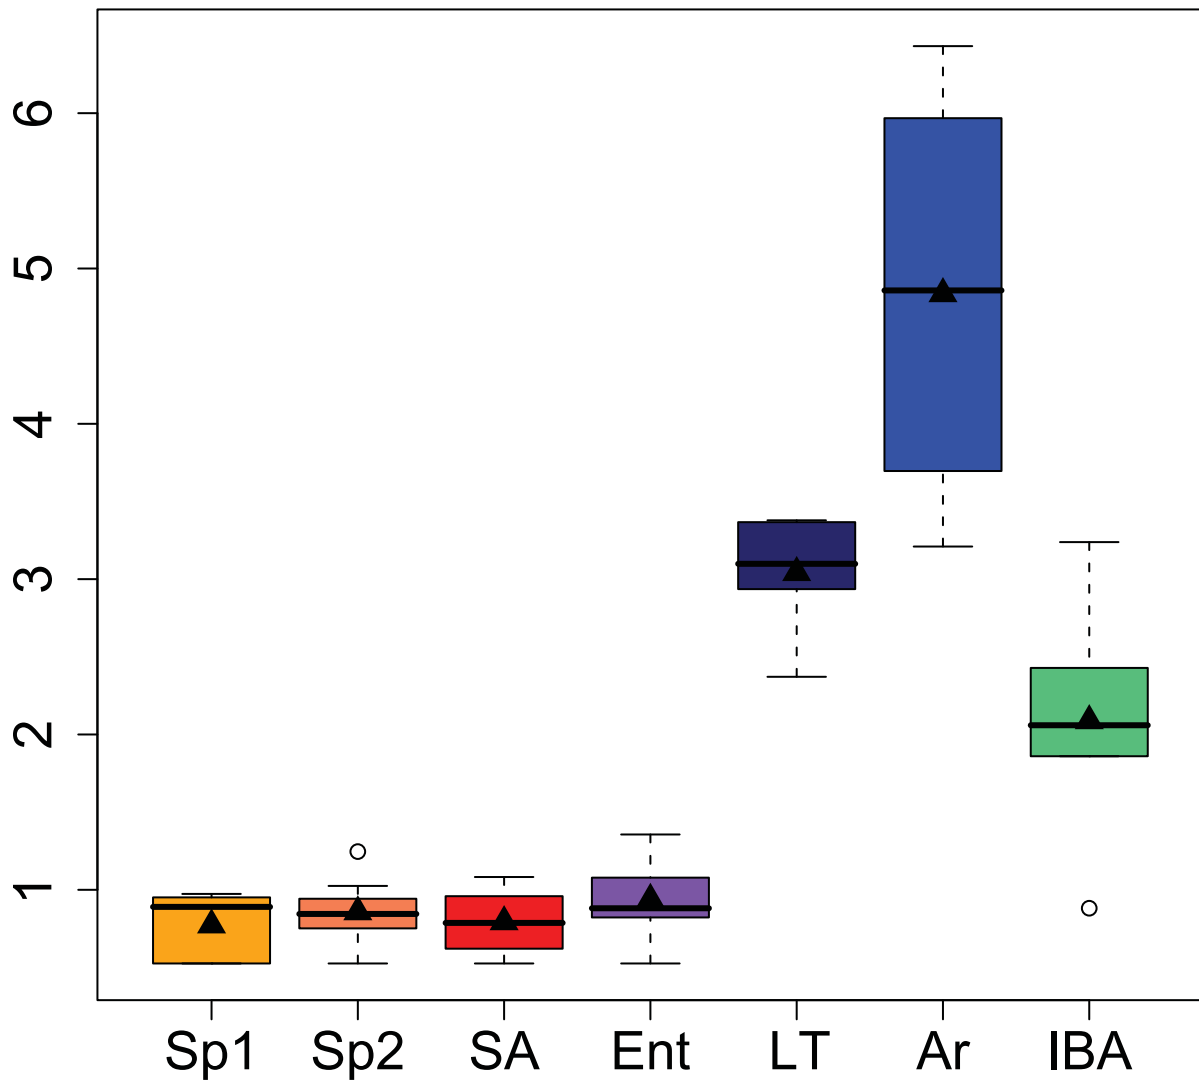

galactarate (mucic acid)

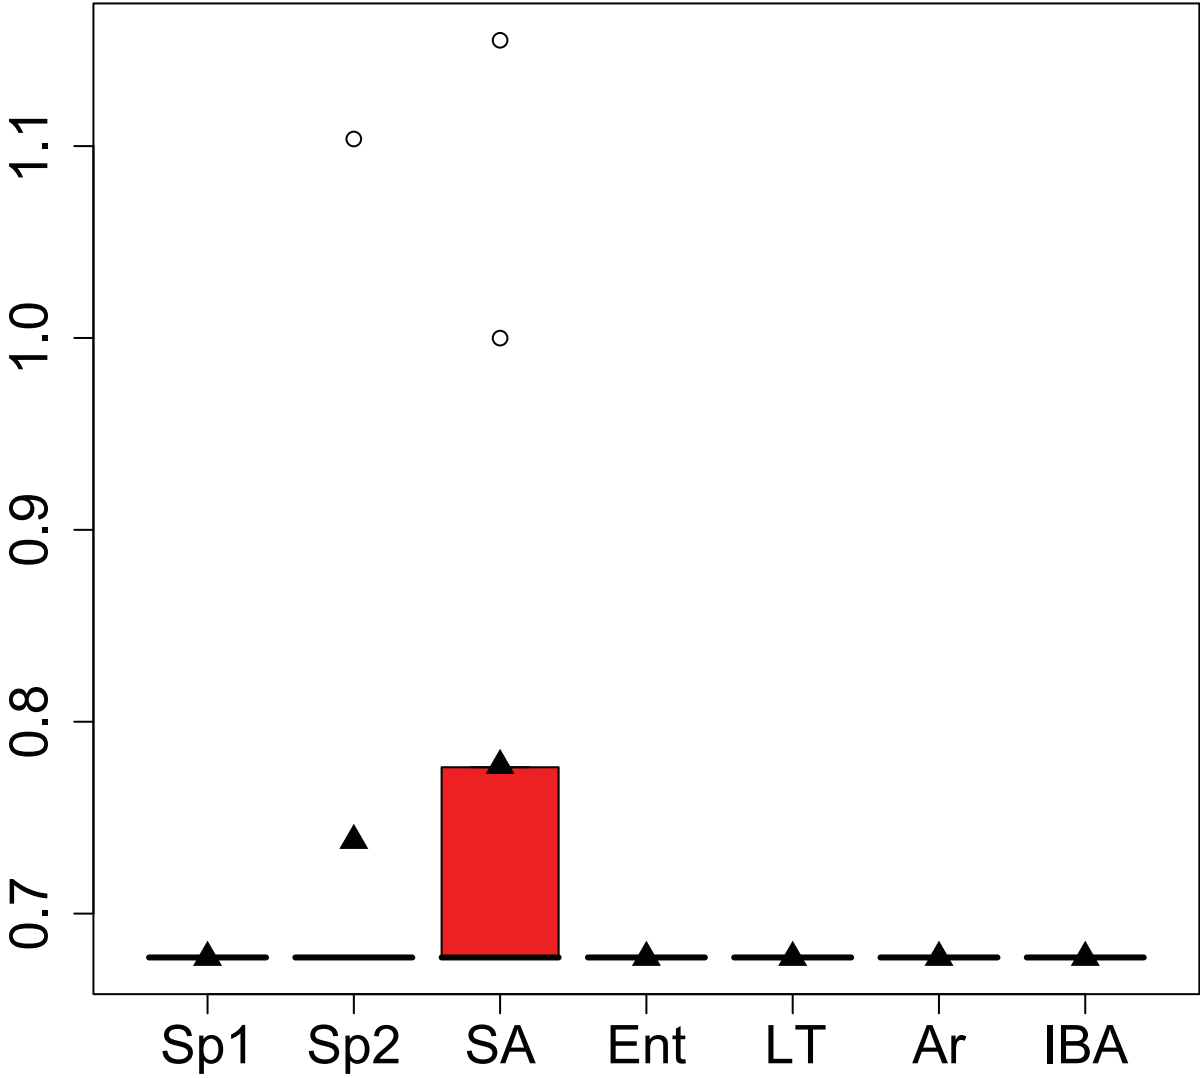

Supplement: figS2.pdf [file figS2.pdf]
