# Supplementary material
Source: PubMed Central journal article supplement (PMC3132838)

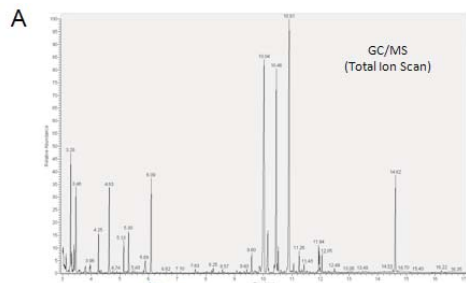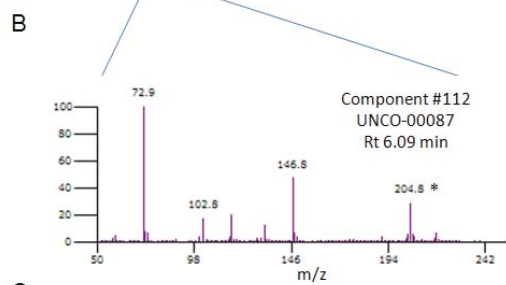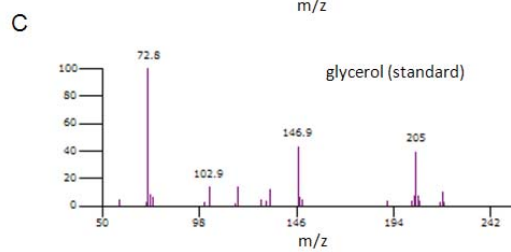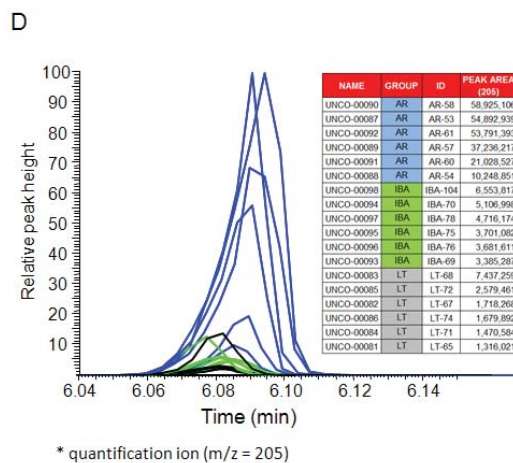

Figure S1

Supplement: figS1.pdf [file figS1.pdf]
